# Supplementary material for: Physiological and Biochemical Characteristics of Rainbow Trout with Severe, Moderate and Asymptomatic Course of Vibrio anguillarum Infection
Source: MDPI journal article supplement (doi:10.3390/ani12192642), 2022-10-01
Supplement: s1 [file s1]

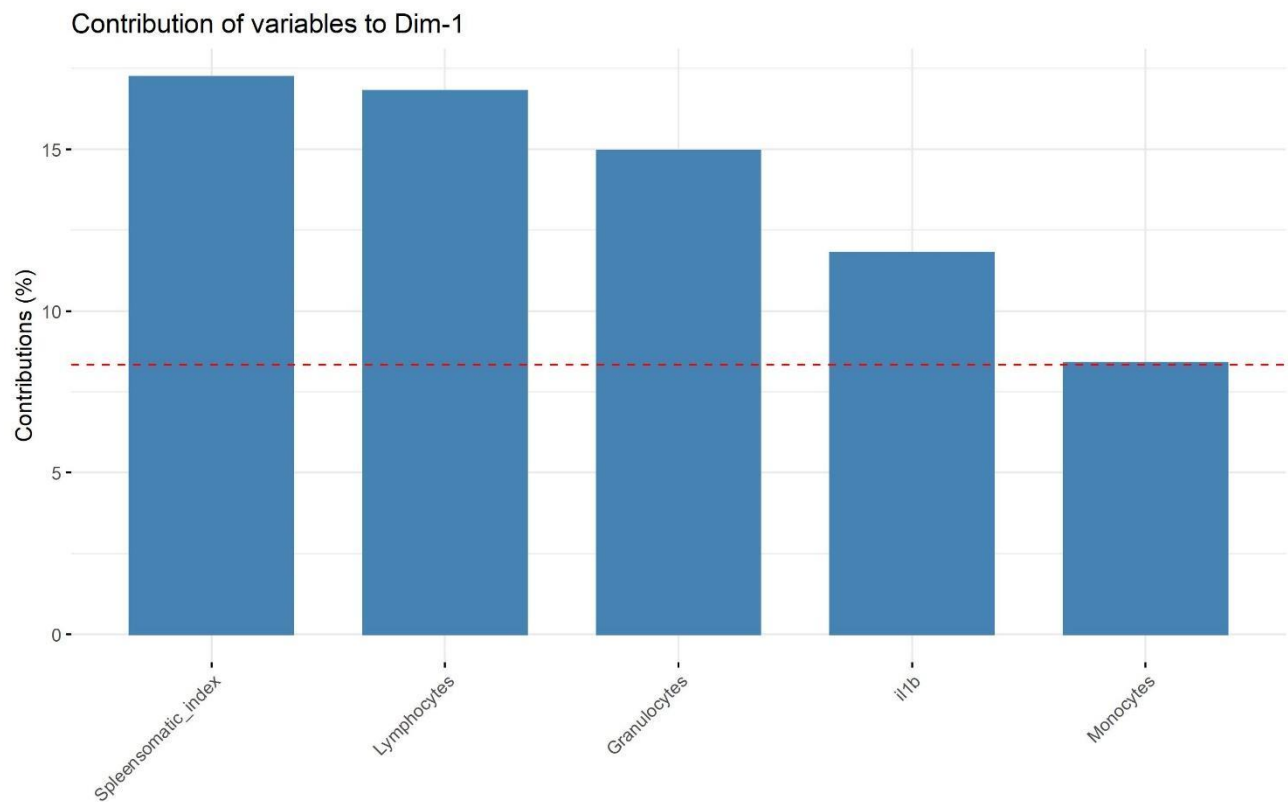

**Figure S1.** Contribution of variables to dimension 1 in the principal component analysis of the measured morphophysiological parameters and biomarkers of immune response of rainbow trout collected in the fish farm during a vibriosis outbreak.



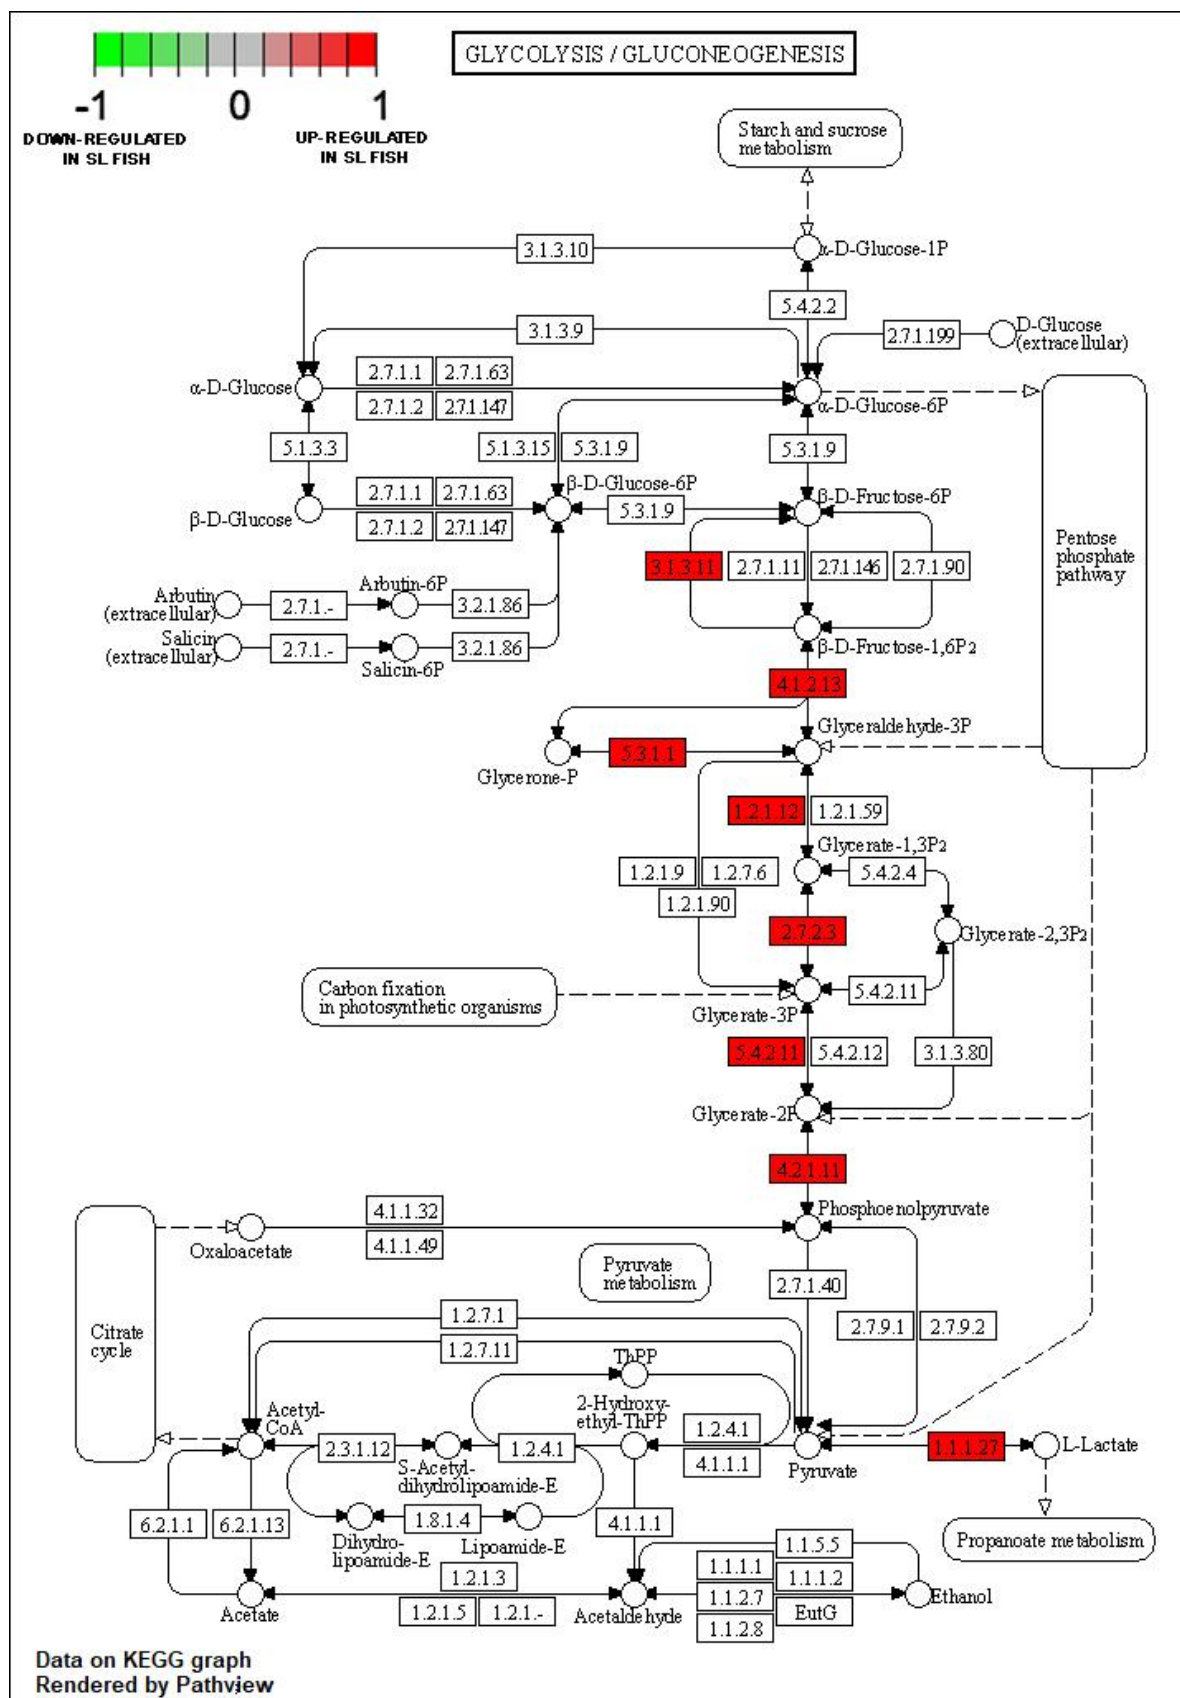

**Figure S3.** Reconstruction of the glycolysis/gluconeogenesis KEGG pathway (ko00010) in severely affected (SL) trout compared to other fish in the fish farm during a vibriosis outbreak.
