# Supplementary material for: Physiological and Biochemical Characteristics of Rainbow Trout with Severe, Moderate and Asymptomatic Course of Vibrio anguillarum Infection
Source: Animals (Basel). 2022 Oct 1;12(19):2642. doi: 10.3390/ani12192642 (PMC9559680; doi:10.3390/ani12192642)
Supplement: Supplementary file 1 [file animals-12-02642-s001.zip › SupplementaryTable S1.xlsx]

## Sheet: Table S1.1
Table S1.1. Description of the sampling site (fish farm).
№ cage	Location	Date	Water temperature, °C	Dissolved oxygen, mg/L	Salinity, ‰	Origin of fish batch	Age	Number of fish in the cage, pcs.	Weight of fish in a cage, tons	Average weight of fish in the cage, kg	Feed manufacturer	Feed	Feed composition	Comments
3	White Sea (67°14' N, 32°39' E)	2020-08-05	16.3	9.6	12-14	trout farm "Priladozh'e"	2+	3036	5.816	1.916	Raisioaqua, Finland	"Hercules" № 7	Protein - 36%; Crude Lipid - 35%; Cellulose - 1,1 %; Ash - 4,5%	The fish overwintered in fresh water
4	White Sea (67°14' N, 32°39' E)	2020-08-05	16.3	9.6	12-14	trout farm "Priladozh'e"	2+	2696	5.227	1.939	Raisioaqua, Finland	"Hercules" № 7	Protein - 36%; Crude Lipid - 35%; Cellulose - 1,1 %; Ash - 4,5%	The fish overwintered in fresh water
5	White Sea (67°14' N, 32°39' E)	04.08-05.08.2020	16.3	9.6	12-14	trout farm "Priladozh'e"	2+	3091	5.889	1.905	Raisioaqua, Finland	"Hercules" № 7	Protein - 36%; Crude Lipid - 35%; Cellulose - 1,1 %; Ash - 4,5%	The fish overwintered in fresh water
9	White Sea (67°14' N, 32°39' E)	2020-08-05	16.3	9.6	12-14	trout farm "Priladozh'e"	2+	3100	5.483	1.769	Raisioaqua, Finland	"Hercules" № 7	Protein - 36%; Crude Lipid - 35%; Cellulose - 1,1 %; Ash - 4,5%	The fish overwintered in fresh water

## Sheet: Table S1.2
Table S1.2. Ichthyopathological examination of collected rainbow trout.
*representative photos are available in the repository https://doi.org/10.6084/m9.figshare.17169380
Fish groups: AS - asymptomatic, IP - with infectious process, SL - with severe lesions
n.d. - not determined
№ Fish	21	22	23	24	25	26	27	28	29	30	31	32	33	34	35	36	37	38	39
Fish group Organ	AS	AS	AS	IP	IP	AS	SL	SL	IP	IP	IP	SL	IP	IP	IP	SL	SL	SL	IP
Сage number	5	5	5	3	4	4	3	4	4	3	5	3	3	3	3	3	9	9	9
Behavior	swim actively, maintain balance	swim actively, maintain balance	swim actively, maintain balance	swim actively, maintain balance	swim actively, maintain balance	swim actively, maintain balance	swim actively, maintain balance	swim actively, maintain balance	swim actively, maintain balance	swim actively, maintain balance	swim actively, maintain balance	swim actively, maintain balance	swim actively, maintain balance	swim actively, maintain balance	swim actively, maintain balance	swim actively, maintain balance	swim actively, maintain balance	swim actively, maintain balance	swim actively, maintain balance
Age	2+	2+	2+	2+	2+	2+	2+	2+	2+	2+	2+	2+	2+	2+	2+	2+	2+	2+	2+
Weight, g	1426	1940	1218	1895	887.5	1995	1865	2080	1270	1380	2215	2030	2140	2585	2045	2330	1480	2325	1220
Length (AB), cm	43.6	48.9	42.2	45.4	44.7	48.1	46.1	49.4	41.9	45.4	48.2	49.9	47.1	54.2	46.8	48.9	44	50.4	40.4
Integument	normal	normal	normal	swelling on the head	hemorrhagic skin lesions	normal	deep ulcer, missing eye, hemorrhagic skin lesions	furuncle-like swelling of the back, exudate is released upon opening, , hemorrhagic skin lesions	rectum prolapse, hemorrhagic skin lesions around the anus	hemorrhagic skin lesions	normal	swelling on the back, hemorrhagic skin lesions	normal	small hemorages on the skin	hemorrhagic skin lesions	hemorrhagic skin lesions	massive hemorrhagic skin lesions, ulcer, severe destruction of the anus	deep ulcer on the head, swelling in the eye, hemorrhagic lesions on the body	hemorrhagic skin lesions
Ulcers	-	-	-	+	-	-	+	+	-	-	-	-	-	-	-	-	+	+	-
Swellings	-	swollen anus	-	-	-	-	-	+	+	-	-	+	-	-	-	-	-	-	-
Hemorrhagic skin lesions	-	-	-	-	+	-	+	+	+	+	-	+	-	+	+	+	+	+	+
Fins	normal	partial necrosis of the caudal fin	partial necrosis of the ventral, dorsal, caudal, anal fins, hemorrhage on the pelvic fin	partial necrosis of the ventral, caudal fins	partial necrosis of the ventral, caudal fins	partial necrosis of the caudal fin	partial necrosis of the ventral, pelvic, caudal fin	partial necrosis of the ventral fin	normal	partial necrosis of the ventral, pelvic fin, necrosis of the caudal fin	partial necrosis of the ventral fin, necrosis of the caudal fin	partial necrosis of the ventral, caudal fin	partial necrosis of the ventral, caudal fin	partial necrosis of the pectoral and pelvic fins	normal	normal	partial necrosis of the caudal, anal fin	normal	partial necrosis of the caudal fin
Gills	normal	normal	normal	normal	normal	normal	blisters on the operculums	normal	normal	normal	normal	normal	normal	normal	normal	normal	normal	normal	normal
Liver	normal	normal	hyperemia	pale appearance	normal	normal	hyperemia	normal	hemorrhages	hyperemia	small foci of hemorrhage, pale appearance, dark edge of the liver	dark edge of the liver	small foci of hemorrhage, dark edge of the liver	pale appearance	pale appearance, small foci of hemorrhage	dark edge of the liver	dark edge of the liver	small foci of hemorrhage, dark edge of the liver	foci of haemorrhages
Liver weight, g	13.11	17.59	11.27	19.02	6.93	27.12	26.48	30.52	14.17	18.7	21.88	21.49	25.59	29.47	24.04	26.83	19.37	30.57	n.d.
Spleen	normal	normal	normal	normal	normal	normal	normal	enlarged	normal	normal	normal	enlarged	normal	enlarged	normal	enlarged	enlarged	enlarged	normal
Spleen weight, g	2.54	4.69	2.1	4.2	3.49	6.28	14.95	13.36	4.7	2.85	4.83	13.55	6.92	13.25	2.7	20.26	9.68	17.42	n.d.
Muscles	normal	normal	normal	normal	normal	normal	normal	normal	normal	normal	normal	normal	normal	normal	normal	normal	hemorrhages	normal	normal
Visceral fat	normal	normal	normal	normal	normal	normal	a lot of visceral fat	normal	normal	normal	normal	normal	normal	normal	normal	normal	normal	normal	normal
Abdomen	normal	normal	normal	normal	normal	normal	normal	fluid in the peritoneum	swollen organs	normal	normal	normal	normal	normal	normal	normal	normal	normal	normal
Kidney	normal	normal	normal	normal	normal	normal	normal	normal	normal	normal	normal	normal	normal	normal	normal	normal	normal	normal	normal
Gastrointestinal tract	normal	normal	normal	normal	yellow soft lumps in the intestinal lumen	hyperemia of the intestinal walls	normal	the intestine is inflamed, yellow soft lumps in the intestinal lumen	hyperemia of the intestinal walls	empty stomach	normal	normal	normal	nematode in the stomach	hyperemia of the intestinal walls	the intestine is inflamed, filled with mucus	normal	normal	normal
Pyloric caeca	normal	normal	normal	normal	normal	normal	normal	normal	normal	normal	normal	normal	normal	normal	normal	normal	normal	normal	normal
Anus	normal	bulging anus	normal	bulging anus	normal	bulging anus	bulging anus	normal	rectum prolapse, hemorrhagic skin lesions around the anus	normal	bulging anus	hyperemia, bulging anus	hyperemia, bulging anus	normal	normal	hyperemia, bulging anus	ulcer, severe destruction of the anus	bulging anus	normal
Heart	normal	normal	normal	normal	normal	normal	normal	normal	normal	normal	normal	normal	normal	normal	normal	normal	normal	normal	normal
Swim bladder	normal	normal	normal	fluid in their swim bladder	normal	normal	normal	normal	normal	normal	normal	normal	normal	normal	normal	normal	normal	normal	normal
Hepatosomatic index	0.919355	0.906701	0.925287	1.00369	0.780845	1.3594	1.41984	1.46731	1.11575	1.35507	0.98781	1.05862	1.19579	1.14004	1.17555	1.1515	1.30878	1.31484	n.d.
Spleensomatic index	0.178121	0.241753	0.172414	0.221636	0.393239	0.314787	0.801609	0.642308	0.370079	0.206522	0.218059	0.667488	0.323364	0.512573	0.132029	0.869528	0.654054	0.749247	n.d.

## Sheet: Table S1.3
Table S1.3. Ichthyopathology score* of collected rainbow trout.
*1 point - normal; 2 points - not normal; 3 points - pathological
Fish groups: AS - asymptomatic, IP - with infectious process, SL - with severe lesions
№ Fish	21	22	23	24	25	26	27	28	29	30	31	32	33	34	35	36	37	38	39
Fish group Organ	AS	AS	AS	IP	IP	AS	SL	SL	IP	IP	IP	SL	IP	IP	IP	SL	SL	SL	IP
Fins	1	2	2	2	2	2	2	2	1	3	3	2	2	2	1	1	2	1	2
Integument	1	1	1	3	3	1	3	3	3	3	1	3	1	2	3	3	3	3	1
Gills	1	1	1	1	1	1	1	1	1	1	1	1	1	1	1	1	1	1	1
Liver	1	1	1	1	1	1	1	1	3	1	3	2	3	1	3	2	2	3	3
Spleen	1	1	1	1	1	1	1	2	1	1	1	2	1	2	1	2	2	2	1
Muscles	1	1	1	1	1	1	1	1	1	1	1	1	1	1	1	1	3	1	1
Visceral fat	1	1	1	1	1	1	2	1	1	1	1	1	1	1	1	1	1	1	1
Kidney	1	1	1	1	1	1	1	1	1	1	1	1	1	1	1	1	1	1	1
Gastrointestinal tract	1	1	1	1	2	2	1	3	2	1	1	1	1	2	2	3	1	1	1
Swim bladder	1	1	1	2	1	1	1	1	1	1	1	1	1	1	1	1	1	1	1
Anus	1	2	1	2	1	2	1	1	3	1	2	3	3	1	1	3	3	2	1
Total	11	13	12	16	15	14	15	17	18	15	16	18	16	15	16	19	20	17	14

## Sheet: Table S1.4
Table S1.4. Evaluation of a blood smear of collected rainbow trout.
Fish groups: AS - asymptomatic, IP - with infectious process, SL - with severe lesions
n.d. - not determined
№ Fish	21	22	23	26	24	25	29	30	31	33	34	35	39	27	28	32	36	37	38
Fish group Blood cells	AS	AS	AS	AS	IP	IP	IP	IP	IP	IP	IP	IP	IP	SL	SL	SL	SL	SL	SL
Erythrocytes, % of total blood cells	93.57	81.58	92.94	97	93.27	97.69	n.d.	94.81	94.72	92.4	94.63	93.9	95.42	96.66	97.03	97.52	97.09	97.09	95.42
Leucocytes, % of total blood cells	6.43	18.42	7.06	3	6.73	2.31	n.d.	5.19	5.28	7.6	5.37	6.1	4.58	3.34	2.97	2.48	2.91	2.91	4.58
Thrombocytes, % of total blood cells	0.66	0.53	0.44	0.56	1.45	0.33	n.d.	0.99	0.6	0.82	2.3	0.7	0.38	0.76	0	0.83	0.39	0	0.38
Granulocytes, % of total leucocytes	2.25303	11.7943	2.26586	0	0	16.6667	n.d.	29.2857	6.41026	3.09735	25.0814	4.25926	18.0952	29.4574	24.9158	12.7273	53.9683	41.5808	68.0952
Monocytes, % of total leucocytes	0	1.45333	0	0	0	0	n.d.	0	0	0	0	0	0	0	5.05051	0	0	41.5808	9.04762
Lymphocytes, % of total leucocytes	97.747	86.8083	97.7341	100	99.8106	83.3333	n.d.	70.4762	93.3761	96.9027	74.9186	95.5556	81.9048	70.5426	70.0337	87.8788	46.4286	16.8385	22.619

## Sheet: Table S1.5-S1.6
Table S1.5. Primers used for gene expression analysis in rainbow trout.
gene	Sequence 5'–3'	NCBI accession number	Product size, b.p.	Annealing temperature, °С	Reference
bact (ß-actin)	FW:CCGGCCGCGACCTCACAGACTAC RV:CGGCCGTGGTGGTGAAGCTGTAAC	AJ438158	73	58	Salem et al., 2007, doi: 10.1186/1471-2164-8-328
il1b (interleukin-1 beta)	FW:ACCGAGTTCAAGGACAAGGA RV:CATTCATCAGGACCCAGCAC	AJ223954	181	58	Kim, Austin, 2006, doi: 10.1016/j.vetimm.2006.08.015.
il8 (interleukin-8)	FW:TGTCGTTGTGCTCCTGG RV:CCTGACCGCTCTTGCTC	NM_001124362.1	197	58	Tongsri et al., 2020, doi: 10.1016/j.fsi.2020.01.044
tgfb (transforming growth factor beta)	FW:CACTGGCTACTTTGCTAACTACTG RV:GCTCCACCTTGTGTTGTCTCC	X99303	191	58	Own design
Table S1.6. The level of expression of immune-related genes in the spleen of rainbow trout.
Fish groups: AS - asymptomatic, IP - with infectious process, SL - with severe lesions
№ Fish	21	22	23	26	24	25	29	30	31	33	34	35	39	27	28	32	36	37	38
Fish group Gene	AS	AS	AS	AS	IP	IP	IP	IP	IP	IP	IP	IP	IP	SL	SL	SL	SL	SL	SL
Il1b, 2^(Ct il1b-Ct bact)	0.00564977	0.000584812	0.00564977	0.00102497	0.00185333	0.00373372	0.000718867	0.00838029	0.00756583	0.000618334	0.000760324	0.00176456	0.00276525	0.0618519	0.258657	0.560363	0.303955	0.428584	0.012731
Il8, 2^(Ct il8-Ct bact)	0.00569794	0.00529518	0.00569794	0.000425755	0.0043736	0.00716716	0.000521616	0.00193797	0.00199514	0.00237517	0.000393068	0.00610071	0.00473709	0.0657269	0.32415	1.14727	0.194539	0.455047	0.0477876
tgfb, 2^(Ct tgfb-Ct bact)	0.0209845	0.0203849	0.0209845	0.00594368	0.0215841	0.0158647	0.00637368	0.0143347	0.0565637	0.0346119	0.0169391	0.0420973	0.0548427	0.0219209	0.0181557	0.0523846	0.0150394	0.047102	0.097153
