# Supplementary material for: Physiological and Biochemical Characteristics of Rainbow Trout with Severe, Moderate and Asymptomatic Course of Vibrio anguillarum Infection
Source: Animals (Basel). 2022 Oct 1;12(19):2642. doi: 10.3390/ani12192642 (PMC9559680; doi:10.3390/ani12192642)
Supplement: Supplementary file 1 [file animals-12-02642-s001.zip › SupplementaryTable S2.xlsx]

## Sheet: Table S2.1.
Table S2.1. LFQ intensity of identified Oncorhynchus mykiss proteins (raw data)*.
* Mass-spectra are available via ProteomeXchange with identifier PXD031356. Project Name: The Proteomic Characteristics of Rainbow Trout Blood with Severe, Moderate and Asymptomatic course of Vibrio anguillarum infection
Majority protein IDs	Peptide counts (all)	Peptide counts (razor+unique)	Peptide counts (unique)	Number of proteins	Peptides	Razor + unique peptides	Unique peptides	Peptides 21	Peptides 21_20210616195233	Peptides 21_20210616212341	Peptides 22	Peptides 22_20210617012729	Peptides 22_20210617025835	Peptides 23	Peptides 23_20210617070219	Peptides 23_20210617083325	Peptides 25	Peptides 25_20210617123707	Peptides 25_20210617140811	Peptides 26	Peptides 26_20210617181155	Peptides 26_20210617194301	Peptides 27	Peptides 27_20210617234643	Peptides 27_20210618011749	Peptides 28	Peptides 28_20210618052129	Peptides 28_20210618065235	Peptides 29	Peptides 29_20210618105615	Peptides 29_20210618122721	Peptides 32	Peptides 32_20210618163102	Peptides 32_20210618180212	Peptides 33	Peptides 33_20210618220555	Peptides 33_20210618233701	Peptides 36	Peptides 36_20210619034041	Peptides 36_20210619051148	Peptides 37	Peptides 37_20210619091530	Peptides 37_20210619104636	Peptides 38	Peptides 38_20210619202506	Peptides 38_20210619215612	Peptides 39	Peptides 39_20210620015952	Peptides 39_20210620033058
sp|O13008|FABPH_ONCMY Fatty acid-binding protein, heart OS=Oncorhynchus mykiss OX=8022 GN=fabp3 PE=2 SV=3	8;2;1	8;2;1	7;2;0	3	8	8	7	1	1	1	1	1	1	1	1	1	1	1	1	1	1	1	4	7	6	3	2	2	1	1	1	1	1	1	1	1	1	2	2	2	1	0	0	0	0	0	1	1	1
sp|O57523|APA11_ONCMY Apolipoprotein A-I-1 OS=Oncorhynchus mykiss OX=8022 PE=2 SV=1	44;4	44;4	33;4	2	44	44	33	18	21	20	15	15	15	19	19	22	20	17	17	19	18	19	38	39	40	22	18	20	20	18	20	15	15	16	20	20	19	18	17	17	17	19	16	15	16	16	15	16	16
sp|P02141|HBB4_ONCMY Hemoglobin subunit beta-4 OS=Oncorhynchus mykiss OX=8022 GN=hbb4 PE=1 SV=3	17;5;1	1;0;0	1;0;0	3	17	1	1	11	11	12	10	10	10	11	11	11	11	11	11	11	11	11	7	7	7	9	10	9	10	11	10	10	11	10	10	10	9	10	9	9	11	11	11	10	10	9	7	8	8
sp|P02142|HBB1_ONCMY Hemoglobin subunit beta-1 OS=Oncorhynchus mykiss OX=8022 GN=hbb1 PE=1 SV=1	16;1	1;0	1;0	2	16	1	1	11	11	11	9	9	9	9	10	10	9	9	10	10	10	10	4	6	7	6	7	7	9	8	9	9	9	8	8	8	6	8	9	9	8	9	9	10	8	8	6	7	6
sp|P06350|H1_ONCMY Histone H1 OS=Oncorhynchus mykiss OX=8022 PE=1 SV=2	5	5	4	1	5	5	4	4	4	5	2	2	3	2	1	2	3	4	2	1	1	1	0	0	0	1	2	2	2	1	2	1	1	1	0	0	0	1	1	1	0	1	1	1	2	1	0	0	1
sp|P0DMV4|ITLN_ONCMY Intelectin OS=Oncorhynchus mykiss OX=8022 GN=itln PE=1 SV=1	8;2	8;2	7;2	2	8	8	7	0	1	1	1	1	1	0	0	1	2	2	2	3	2	2	2	2	3	5	5	5	3	2	2	4	4	4	4	4	3	6	6	5	3	1	1	4	3	3	1	1	1
sp|P11941|LYSC2_ONCMY Lysozyme C II OS=Oncorhynchus mykiss OX=8022 PE=1 SV=2;tr|A0A060WSJ7|A0A060WSJ7_ONCMY Lysozyme OS=Oncorhynchus mykiss OX=8022 GN=GSONMT00021084001 PE=3 SV=1;tr|A0A060WS79|A0A060WS79_ONCMY Lysozyme OS=Oncorhynchus mykiss OX=8022 GN=GSO	8;5;4;1	8;5;4;1	8;5;4;1	4	8	8	8	2	3	3	2	2	1	1	1	1	3	5	5	4	5	5	6	6	6	5	6	6	2	2	2	5	5	5	3	3	3	5	5	5	5	5	5	4	4	4	3	5	3
sp|P14527|HBA4_ONCMY Hemoglobin subunit alpha-4 OS=Oncorhynchus mykiss OX=8022 GN=hba4 PE=1 SV=1	14;1;1	3;0;0	0;0;0	3	14	3	0	10	9	10	7	7	6	7	8	9	10	10	10	8	8	7	6	4	5	6	5	4	7	7	9	7	6	7	6	5	4	7	7	6	7	10	10	8	7	6	4	5	5
sp|P24774|RET4A_ONCMY Retinol-binding protein 4-A OS=Oncorhynchus mykiss OX=8022 GN=rbp4a PE=1 SV=2;tr|Q90Y51|Q90Y51_ONCMY Retinol-binding protein OS=Oncorhynchus mykiss OX=8022 GN=RBP PE=2 SV=1;tr|Q8JIZ4|Q8JIZ4_ONCMY Retinol binding protein (Fragment) OS=	4;4;3	1;1;1	1;1;1	3	4	1	1	3	3	1	1	1	1	1	2	2	0	0	0	1	2	1	0	0	0	1	0	0	1	2	2	1	0	0	1	2	2	1	1	1	2	2	2	0	0	0	2	1	1
sp|P26352|TYB12_ONCMY Thymosin beta-12 OS=Oncorhynchus mykiss OX=8022 PE=1 SV=2	5	5	2	1	5	5	2	1	1	1	1	1	1	1	1	1	1	1	1	1	1	1	4	4	4	1	0	1	1	1	1	1	1	1	1	0	1	1	1	1	1	1	1	1	1	1	1	1	1
sp|P62797|H4_ONCMY Histone H4 OS=Oncorhynchus mykiss OX=8022 PE=1 SV=2	7;1	7;1	7;1	2	7	7	7	5	5	5	4	5	5	5	5	5	7	6	5	3	3	4	2	2	2	2	2	1	2	4	3	3	1	0	1	1	1	1	1	2	1	1	2	3	3	4	0	0	0
sp|P69069|H2B_ONCMY Histone H2B OS=Oncorhynchus mykiss OX=8022 PE=1 SV=2;tr|A0A060W7W3|A0A060W7W3_ONCMY Histone domain-containing protein OS=Oncorhynchus mykiss OX=8022 GN=GSONMT00069098001 PE=3 SV=1	4;3;1	4;3;1	4;3;1	3	4	4	4	3	2	2	2	1	2	2	3	2	1	2	2	1	1	1	1	1	1	1	1	1	2	2	1	1	1	1	1	1	1	1	1	1	1	1	1	1	1	1	1	1	1
sp|P84234|H32_ONCMY Histone H3.2 OS=Oncorhynchus mykiss OX=8022 PE=1 SV=2;tr|A0A060YRQ4|A0A060YRQ4_ONCMY Histone domain-containing protein OS=Oncorhynchus mykiss OX=8022 GN=GSONMT00017648001 PE=3 SV=1;tr|C1BGV2|C1BGV2_ONCMY Histone H3 OS=Oncorhynchus mykis	2;2;1;1;1;1;1;1;1	2;2;1;1;1;1;1;1;1	2;2;1;1;1;1;1;1;1	9	2	2	2	0	2	0	2	1	1	1	1	1	1	1	1	1	1	0	0	0	0	1	0	1	1	1	1	0	0	1	0	0	0	0	0	1	0	1	0	1	1	1	1	0	0
sp|P86431|PRVB1_ONCMY Parvalbumin beta 1 OS=Oncorhynchus mykiss OX=8022 PE=1 SV=1	2	1	1	1	2	1	1	1	1	1	0	0	0	0	0	0	0	0	0	0	0	0	0	0	0	2	2	2	0	0	0	2	2	2	0	0	0	1	1	1	0	0	0	0	0	0	0	0	0
sp|P98093|CO3_ONCMY Complement C3 (Fragment) OS=Oncorhynchus mykiss OX=8022 GN=c3 PE=1 SV=1	122;1;1	122;1;1	43;1;0	3	122	122	43	56	61	58	49	52	57	59	64	59	62	64	62	64	62	64	85	89	85	68	68	66	52	51	51	56	55	57	59	64	61	66	62	60	51	61	62	55	63	57	58	58	60
sp|Q91195|CYT_ONCMY Cystatin OS=Oncorhynchus mykiss OX=8022 PE=2 SV=1;tr|A0A060VN46|A0A060VN46_ONCMY Cystatin domain-containing protein OS=Oncorhynchus mykiss OX=8022 GN=GSONMT00077770001 PE=4 SV=1	5;5	5;5	5;5	2	5	5	5	1	1	1	0	1	1	0	0	0	0	0	0	0	0	1	2	2	1	0	0	0	0	0	0	0	1	1	0	0	0	0	0	0	0	0	0	0	0	0	0	0	0
sp|Q92093|VIT_ONCMY Vitellogenin OS=Oncorhynchus mykiss OX=8022 GN=vtg1 PE=1 SV=1	63;6;6;5	63;6;6;5	63;6;6;5	4	63	63	63	5	5	5	0	0	0	33	33	34	0	0	0	36	33	36	12	14	13	0	0	0	35	25	27	29	26	26	41	41	45	5	7	5	31	29	29	10	10	12	0	0	0
tr|A0A060PQD5|A0A060PQD5_ONCMY Complement C1q-like factor (Fragment) OS=Oncorhynchus mykiss OX=8022 GN=C1QL PE=2 SV=1	4	1	1	1	4	1	1	0	0	0	0	0	0	0	0	0	1	1	0	1	1	1	1	2	2	2	2	1	1	1	1	1	1	1	1	1	0	1	1	1	1	1	1	1	2	2	0	0	0
tr|A0A060VM28|A0A060VM28_ONCMY Prothrombin OS=Oncorhynchus mykiss OX=8022 GN=GSONMT00064112001 PE=3 SV=1;tr|Q5NKF9|Q5NKF9_ONCMY Prothrombin OS=Oncorhynchus mykiss OX=8022 PE=2 SV=1;tr|Q91218|Q91218_ONCMY Thrombin (Fragment) OS=Oncorhynchus mykiss OX=8022 G	26;24;13	26;24;13	7;6;2	3	26	26	7	13	14	13	12	11	11	11	13	13	12	13	13	14	13	14	15	16	18	11	12	11	13	12	13	10	10	12	12	13	14	14	13	14	12	12	12	10	11	10	12	12	12
tr|A0A060VM33|A0A060VM33_ONCMY Metalloendopeptidase OS=Oncorhynchus mykiss OX=8022 GN=GSONMT00064123001 PE=4 SV=1;tr|C1BI03|C1BI03_ONCMY Metalloendopeptidase OS=Oncorhynchus mykiss OX=8022 GN=HCE23 PE=2 SV=1;tr|C1BH58|C1BH58_ONCMY Metalloendopeptidase OS=O	6;5;5;1	6;5;5;1	6;5;5;1	4	6	6	6	0	0	0	0	0	0	0	0	1	0	1	1	1	1	0	1	1	1	2	3	3	1	0	0	3	2	2	0	0	0	2	5	4	0	0	0	0	0	0	0	0	1
tr|A0A060VMQ9|A0A060VMQ9_ONCMY PKS_ER domain-containing protein OS=Oncorhynchus mykiss OX=8022 GN=GSONMT00076602001 PE=3 SV=1	2	2	2	1	2	2	2	0	0	0	0	0	0	0	0	0	0	0	0	0	0	0	0	0	0	0	0	0	0	0	0	0	0	0	0	0	0	0	0	0	1	0	1	0	0	0	0	0	1
tr|A0A060VN69|A0A060VN69_ONCMY Peptidase M12B domain-containing protein OS=Oncorhynchus mykiss OX=8022 GN=GSONMT00078934001 PE=4 SV=1	2	2	2	1	2	2	2	1	1	0	0	0	0	0	0	0	0	0	0	0	0	0	0	0	0	0	0	0	0	0	0	0	0	0	0	0	0	0	0	0	0	0	0	0	0	0	0	0	0
tr|A0A060VPV7|A0A060VPV7_ONCMY Uncharacterized protein OS=Oncorhynchus mykiss OX=8022 GN=GSONMT00066494001 PE=3 SV=1;tr|A0A060VMC6|A0A060VMC6_ONCMY Uncharacterized protein OS=Oncorhynchus mykiss OX=8022 GN=GSONMT00070913001 PE=3 SV=1	1;1	1;1	1;1	2	1	1	1	0	0	0	0	0	0	0	1	0	0	0	0	1	1	1	1	1	1	0	1	0	0	0	1	1	0	1	0	0	0	1	0	0	0	0	1	1	0	0	0	0	0
tr|A0A060VQZ6|A0A060VQZ6_ONCMY Uncharacterized protein OS=Oncorhynchus mykiss OX=8022 GN=GSONMT00070223001 PE=4 SV=1	4	4	2	1	4	4	2	0	0	0	0	0	0	0	0	0	0	0	0	0	0	0	0	0	0	0	0	0	0	0	0	0	0	0	3	3	3	0	0	0	1	0	0	0	0	0	0	0	0
tr|A0A060VR48|A0A060VR48_ONCMY Uncharacterized protein OS=Oncorhynchus mykiss OX=8022 GN=GSONMT00070222001 PE=4 SV=1;tr|A0A060WW90|A0A060WW90_ONCMY Uncharacterized protein OS=Oncorhynchus mykiss OX=8022 GN=GSONMT00017587001 PE=4 SV=1	1;1	1;1	1;1	2	1	1	1	0	0	0	0	0	0	0	0	0	0	0	0	0	0	0	0	0	0	0	0	0	0	0	0	0	0	0	0	0	0	0	0	0	0	0	0	0	0	0	0	0	0
tr|A0A060VTV1|A0A060VTV1_ONCMY A2M_recep domain-containing protein OS=Oncorhynchus mykiss OX=8022 GN=GSONMT00077637001 PE=4 SV=1	18	4	4	1	18	4	4	6	8	6	5	5	5	6	8	7	7	6	5	6	7	7	10	10	10	9	8	8	6	5	5	6	5	5	8	8	6	8	8	6	5	8	8	4	6	4	6	4	6
tr|A0A060VUA9|A0A060VUA9_ONCMY Triosephosphate isomerase OS=Oncorhynchus mykiss OX=8022 GN=GSONMT00077680001 PE=3 SV=1;tr|Q70I40|Q70I40_ONCMY Triosephosphate isomerase (Fragment) OS=Oncorhynchus mykiss OX=8022 GN=tpi PE=3 SV=1;tr|A0A060PJH1|A0A060PJH1_ONCM	13;10;8;2;2	13;10;8;2;2	1;1;1;0;0	5	13	13	1	4	5	4	3	2	2	0	0	1	0	1	0	1	2	0	7	7	8	8	10	10	3	4	4	8	9	9	1	0	1	5	6	5	2	1	1	4	4	3	1	1	1
tr|A0A060VUI9|A0A060VUI9_ONCMY Peptidyl-prolyl cis-trans isomerase OS=Oncorhynchus mykiss OX=8022 GN=GSONMT00078004001 PE=3 SV=1	2	2	2	1	2	2	2	0	0	0	0	0	0	0	0	0	0	0	0	0	0	0	0	0	0	0	0	0	0	0	0	0	0	0	0	0	0	0	1	0	0	0	0	0	0	0	0	0	0
tr|A0A060VVE5|A0A060VVE5_ONCMY Fructose-bisphosphate aldolase OS=Oncorhynchus mykiss OX=8022 GN=GSONMT00078591001 PE=3 SV=1	20	7	7	1	20	7	7	4	5	4	2	2	3	1	1	1	0	0	0	0	1	1	9	11	11	12	14	12	1	0	1	14	13	11	0	0	1	7	6	5	0	0	0	5	5	3	0	0	0
tr|A0A060VVF4|A0A060VVF4_ONCMY Transgelin OS=Oncorhynchus mykiss OX=8022 GN=GSONMT00078604001 PE=3 SV=1;tr|A0A060WCS8|A0A060WCS8_ONCMY Transgelin OS=Oncorhynchus mykiss OX=8022 GN=GSONMT00068273001 PE=3 SV=1	2;2	2;2	2;2	2	2	2	2	0	0	0	0	0	0	1	0	1	0	0	0	0	0	0	0	0	0	1	1	1	0	0	0	0	0	0	0	0	0	0	0	0	0	0	0	0	0	0	0	0	0
tr|A0A060VWC6|A0A060VWC6_ONCMY Uncharacterized protein OS=Oncorhynchus mykiss OX=8022 GN=GSONMT00064251001 PE=3 SV=1	13	13	13	1	13	13	13	7	7	8	4	4	4	5	6	5	0	0	0	7	8	7	4	4	4	0	0	0	7	5	5	4	6	4	10	8	9	5	6	5	2	2	2	6	7	4	6	6	5
tr|A0A060VWF6|A0A060VWF6_ONCMY Uncharacterized protein OS=Oncorhynchus mykiss OX=8022 GN=GSONMT00079314001 PE=4 SV=1	2	2	2	1	2	2	2	0	0	0	0	0	0	0	0	0	0	0	0	0	0	0	0	0	0	0	0	0	0	0	0	0	0	0	0	0	0	0	1	1	0	0	0	0	0	0	0	0	0
tr|A0A060VWJ5|A0A060VWJ5_ONCMY Uncharacterized protein OS=Oncorhynchus mykiss OX=8022 GN=GSONMT00064895001 PE=3 SV=1	1	1	1	1	1	1	1	0	0	0	0	0	0	0	0	0	0	0	0	0	0	1	1	1	1	1	0	1	0	0	0	1	1	1	0	0	0	1	1	0	0	0	0	0	0	0	0	0	0
tr|A0A060VWT1|A0A060VWT1_ONCMY Uncharacterized protein OS=Oncorhynchus mykiss OX=8022 GN=GSONMT00079455001 PE=4 SV=1	1	1	1	1	1	1	1	0	0	0	0	0	0	0	0	0	0	0	0	0	0	0	0	1	1	1	1	1	0	0	0	0	0	0	0	0	0	1	0	1	0	0	0	0	0	0	0	0	0
tr|A0A060VWW1|A0A060VWW1_ONCMY Uncharacterized protein OS=Oncorhynchus mykiss OX=8022 GN=GSONMT00072225001 PE=3 SV=1;sp|Q5QT17|LEG1H_ONCMY Protein LEG1 homolog OS=Oncorhynchus mykiss OX=8022 GN=leg1 PE=2 SV=1	10;10	10;10	8;8	2	10	10	8	5	7	7	5	5	5	4	4	4	4	6	5	5	5	4	5	6	5	4	5	5	5	6	6	4	5	4	4	4	6	5	6	6	6	6	5	3	5	3	6	5	5
tr|A0A060VX60|A0A060VX60_ONCMY Uncharacterized protein OS=Oncorhynchus mykiss OX=8022 GN=GSONMT00080167001 PE=4 SV=1	3;1	3;1	3;1	2	3	3	3	0	0	0	0	0	0	0	0	0	0	0	0	0	0	0	0	0	0	1	1	1	0	0	0	0	2	3	0	0	0	0	0	0	0	0	0	0	0	0	0	0	0
tr|A0A060VXZ0|A0A060VXZ0_ONCMY Prothrombin OS=Oncorhynchus mykiss OX=8022 GN=GSONMT00080766001 PE=3 SV=1	26	9	8	1	26	9	8	13	13	12	11	9	10	10	14	13	13	12	13	14	13	15	13	14	16	10	11	11	15	12	14	8	11	12	15	15	16	16	16	16	12	10	10	10	11	10	13	11	13
tr|A0A060VY25|A0A060VY25_ONCMY Creatine kinase OS=Oncorhynchus mykiss OX=8022 GN=GSONMT00080405001 PE=3 SV=1;tr|C1BGT5|C1BGT5_ONCMY Creatine kinase OS=Oncorhynchus mykiss OX=8022 GN=KCRT PE=2 SV=1;tr|C1BGR4|C1BGR4_ONCMY Creatine kinase OS=Oncorhynchus myki	2;1;1;1;1	1;1;1;1;1	1;1;1;1;1	5	2	1	1	0	0	0	0	0	0	0	0	0	0	0	0	0	0	0	1	1	1	2	2	2	0	0	0	1	1	1	0	0	0	0	1	2	0	0	0	0	0	0	0	0	0
tr|A0A060VY79|A0A060VY79_ONCMY TGF_BETA_2 domain-containing protein OS=Oncorhynchus mykiss OX=8022 GN=GSONMT00070211001 PE=3 SV=1;tr|C0KIY1|C0KIY1_ONCMY Anti-mullerian hormone (Fragment) OS=Oncorhynchus mykiss OX=8022 PE=4 SV=1	2;1	2;1	2;1	2	2	2	2	0	0	0	0	0	0	0	0	0	0	0	0	0	0	0	0	0	0	0	0	0	0	0	0	0	0	0	1	1	1	0	0	0	0	0	0	0	0	0	0	0	0
tr|A0A060VZ82|A0A060VZ82_ONCMY FERM domain-containing protein OS=Oncorhynchus mykiss OX=8022 GN=GSONMT00081106001 PE=4 SV=1	7;3;3;3;2;2;2;2;1	7;3;3;3;2;2;2;2;1	2;0;0;0;0;0;0;0;1	9	7	7	2	1	1	0	1	2	1	1	1	1	0	0	1	0	1	0	0	2	1	4	3	3	0	0	0	1	2	1	0	0	0	2	3	1	0	0	0	0	0	0	0	0	0
tr|A0A060VZ90|A0A060VZ90_ONCMY Myosin motor domain-containing protein OS=Oncorhynchus mykiss OX=8022 GN=GSONMT00077452001 PE=3 SV=1;tr|A0A060XMV6|A0A060XMV6_ONCMY Uncharacterized protein OS=Oncorhynchus mykiss OX=8022 GN=GSONMT00017263001 PE=3 SV=1	3;3;1	3;3;1	3;3;1	3	3	3	3	0	0	0	0	0	0	0	0	1	0	0	0	0	0	0	0	0	0	0	0	0	0	0	0	0	0	0	0	0	0	0	0	0	0	0	0	0	0	0	0	0	0
tr|A0A060VZH2|A0A060VZH2_ONCMY Anaphylatoxin-like domain-containing protein OS=Oncorhynchus mykiss OX=8022 GN=GSONMT00077638001 PE=4 SV=1	42	21	20	1	42	21	20	15	14	13	11	10	11	15	18	19	15	20	16	19	18	18	19	20	20	25	26	25	15	17	16	18	19	22	17	21	20	23	24	26	19	19	18	13	13	12	12	14	15
tr|A0A060W0I1|A0A060W0I1_ONCMY Uncharacterized protein OS=Oncorhynchus mykiss OX=8022 GN=GSONMT00082017001 PE=4 SV=1	7	1	1	1	7	1	1	3	2	2	2	2	2	1	2	1	1	4	3	4	3	4	2	5	3	2	4	3	3	4	4	4	5	3	3	4	5	2	3	3	3	2	2	5	5	5	5	6	6
tr|A0A060W0P5|A0A060W0P5_ONCMY 2,3-bisphosphoglycerate 3-phosphatase OS=Oncorhynchus mykiss OX=8022 GN=GSONMT00082558001 PE=3 SV=1	2	2	2	1	2	2	2	0	1	0	0	0	0	0	1	0	0	2	1	0	1	1	0	0	0	0	0	1	0	0	0	0	1	0	0	0	1	0	0	0	0	0	0	0	0	0	0	0	0
tr|A0A060W1F1|A0A060W1F1_ONCMY Uncharacterized protein OS=Oncorhynchus mykiss OX=8022 GN=GSONMT00077640001 PE=4 SV=1	31	4	4	1	31	4	4	16	17	15	15	15	16	17	16	18	17	17	18	16	17	18	26	27	26	21	21	20	16	17	17	17	15	15	18	19	20	17	17	17	14	17	18	16	18	16	17	15	16
tr|A0A060W1M5|A0A060W1M5_ONCMY Uncharacterized protein OS=Oncorhynchus mykiss OX=8022 GN=GSONMT00077952001 PE=3 SV=1	9;3;3;3	9;3;3;3	9;3;3;3	4	9	9	9	0	0	0	0	0	0	0	0	0	0	0	0	0	0	0	0	0	0	5	1	2	0	0	0	6	7	8	0	0	0	0	0	0	0	0	0	0	0	0	0	0	0
tr|A0A060W1N4|A0A060W1N4_ONCMY C-type lectin domain-containing protein OS=Oncorhynchus mykiss OX=8022 GN=GSONMT00064360001 PE=4 SV=1	4	4	4	1	4	4	4	3	2	1	1	0	1	2	2	2	1	2	2	1	1	1	0	1	0	2	2	2	2	2	2	2	2	2	2	2	1	2	2	2	1	2	2	0	0	0	0	0	0
tr|A0A060W2D4|A0A060W2D4_ONCMY Uncharacterized protein OS=Oncorhynchus mykiss OX=8022 GN=GSONMT00065258001 PE=4 SV=1	1	1	1	1	1	1	1	0	0	0	0	0	0	0	0	0	0	0	0	0	0	0	1	1	1	1	1	1	0	0	0	0	0	0	0	0	0	1	1	1	0	1	1	0	0	0	0	0	0
tr|A0A060W2L1|A0A060W2L1_ONCMY Olfactomedin-like domain-containing protein OS=Oncorhynchus mykiss OX=8022 GN=GSONMT00080021001 PE=4 SV=1	8	8	8	1	8	8	8	4	4	4	2	2	2	3	3	3	3	3	2	2	3	3	4	4	5	3	3	3	4	3	3	3	3	3	2	3	3	3	3	2	3	3	3	2	1	2	3	3	3
tr|A0A060W2S2|A0A060W2S2_ONCMY Uncharacterized protein OS=Oncorhynchus mykiss OX=8022 GN=GSONMT00078608001 PE=3 SV=1;sp|O57524|APA12_ONCMY Apolipoprotein A-I-2 OS=Oncorhynchus mykiss OX=8022 PE=2 SV=1	38;38	27;27	27;27	2	38	27	27	17	18	20	15	13	15	17	15	18	13	13	13	16	17	17	31	35	34	21	20	21	20	18	18	15	15	15	18	17	18	16	15	15	15	18	17	14	15	14	14	15	15
tr|A0A060W2U3|A0A060W2U3_ONCMY Lipocln_cytosolic_FA-bd_dom domain-containing protein OS=Oncorhynchus mykiss OX=8022 GN=GSONMT00065215001 PE=3 SV=1;sp|P24775|RET4B_ONCMY Retinol-binding protein 4-B OS=Oncorhynchus mykiss OX=8022 GN=rbp4b PE=1 SV=2	5;4	5;4	1;1	2	5	5	1	4	5	4	2	2	1	1	2	3	2	1	1	3	3	3	0	1	1	3	2	2	1	2	2	1	2	2	2	3	2	3	2	3	2	2	2	2	2	2	1	0	0
tr|A0A060W3H4|A0A060W3H4_ONCMY DUF1943 domain-containing protein OS=Oncorhynchus mykiss OX=8022 GN=GSONMT00080479001 PE=4 SV=1	21	21	21	1	21	21	21	8	7	7	1	0	0	1	3	3	4	0	2	2	2	3	0	0	0	1	1	0	0	0	0	1	2	0	3	6	4	1	1	1	0	1	0	0	1	0	1	0	5
tr|A0A060W405|A0A060W405_ONCMY Bulb-type lectin domain-containing protein OS=Oncorhynchus mykiss OX=8022 GN=GSONMT00065826001 PE=4 SV=1	1	1	1	1	1	1	1	0	0	0	0	0	0	0	0	0	0	0	0	0	0	0	1	1	1	0	0	0	0	0	0	0	0	0	0	0	0	0	0	0	0	0	0	0	0	0	0	0	0
tr|A0A060W451|A0A060W451_ONCMY Aldo_ket_red domain-containing protein OS=Oncorhynchus mykiss OX=8022 GN=GSONMT00079627001 PE=3 SV=1;tr|A0A060WRU1|A0A060WRU1_ONCMY Aldo_ket_red domain-containing protein OS=Oncorhynchus mykiss OX=8022 GN=GSONMT00043865001 PE	3;3;3;3	3;3;3;3	3;3;3;3	4	3	3	3	0	0	0	0	0	0	0	0	0	0	0	0	0	0	0	1	1	0	2	1	0	0	0	0	1	0	2	0	0	0	1	0	1	0	0	0	0	0	0	0	0	0
tr|A0A060W471|A0A060W471_ONCMY IF rod domain-containing protein OS=Oncorhynchus mykiss OX=8022 GN=GSONMT00081031001 PE=4 SV=1;tr|A0A060XRR9|A0A060XRR9_ONCMY IF rod domain-containing protein OS=Oncorhynchus mykiss OX=8022 GN=GSONMT00000651001 PE=3 SV=1;tr|Q	2;2;2;2;2;2;2;1;1;1;1;1;1;1;1;1;1;1;1;1;1;1;1	2;2;2;2;2;2;2;1;1;1;1;1;1;1;1;1;1;1;1;1;1;1;1	2;2;2;2;2;2;2;1;1;1;1;1;1;1;1;1;1;1;1;1;1;1;1	23	2	2	2	0	0	0	0	0	0	0	0	0	0	0	0	0	0	0	0	0	0	0	0	0	0	0	0	0	0	0	0	0	0	0	0	0	0	0	0	0	0	0	0	0	0
tr|A0A060W4G2|A0A060W4G2_ONCMY Adenosine aminohydrolase OS=Oncorhynchus mykiss OX=8022 GN=GSONMT00079936001 PE=3 SV=1;tr|Q90YG3|Q90YG3_ONCMY Putative adenosine deaminase (Fragment) OS=Oncorhynchus mykiss OX=8022 PE=2 SV=1	3;2;1	3;2;1	3;2;1	3	3	3	3	0	0	0	0	0	0	0	0	0	0	0	0	0	0	0	0	0	0	3	2	1	0	0	0	0	1	1	0	0	0	0	1	1	0	0	0	0	0	0	0	0	0
tr|A0A060W6J8|A0A060W6J8_ONCMY Uncharacterized protein OS=Oncorhynchus mykiss OX=8022 GN=GSONMT00068092001 PE=4 SV=1	5	4	4	1	5	4	4	0	0	0	0	0	0	0	0	0	1	1	2	1	1	1	1	2	1	5	5	4	2	2	2	1	1	2	2	0	2	2	1	1	1	1	1	1	1	1	1	0	2
tr|A0A060W748|A0A060W748_ONCMY LRRCT domain-containing protein OS=Oncorhynchus mykiss OX=8022 GN=GSONMT00068091001 PE=4 SV=1	8	8	7	1	8	8	7	2	3	4	2	3	2	4	3	3	4	4	3	3	4	3	4	7	6	5	5	5	2	3	3	3	3	3	3	4	4	5	5	5	3	3	2	4	4	3	2	2	4
tr|A0A060W754|A0A060W754_ONCMY Vitellogenin domain-containing protein OS=Oncorhynchus mykiss OX=8022 GN=GSONMT00068098001 PE=4 SV=1	52;3	52;3	46;3	2	52	52	46	34	31	31	33	34	34	25	25	26	8	11	9	19	23	22	0	2	1	3	1	1	28	34	29	11	9	8	33	26	27	3	6	4	24	24	27	9	10	9	23	22	28
tr|A0A060W7E7|A0A060W7E7_ONCMY Vitellogenin domain-containing protein OS=Oncorhynchus mykiss OX=8022 GN=GSONMT00068102001 PE=4 SV=1	109	109	109	1	109	109	109	63	70	66	19	16	14	33	29	29	0	0	0	46	48	44	21	22	29	10	6	4	27	28	24	14	17	13	41	40	42	19	19	18	26	24	20	3	2	3	48	45	60
tr|A0A060W7L7|A0A060W7L7_ONCMY Catalase OS=Oncorhynchus mykiss OX=8022 GN=GSONMT00082031001 PE=3 SV=1;tr|A0A060X782|A0A060X782_ONCMY Catalase OS=Oncorhynchus mykiss OX=8022 GN=GSONMT00034062001 PE=3 SV=1;tr|A0A060X7X5|A0A060X7X5_ONCMY Catalase OS=Oncorhync	8;4;4	8;4;4	8;4;4	3	8	8	8	1	1	1	0	0	0	1	1	1	1	3	2	1	1	1	0	0	0	0	0	0	1	1	0	1	1	0	0	0	0	0	0	0	1	1	1	0	0	0	0	0	0
tr|A0A060W7T7|A0A060W7T7_ONCMY Uncharacterized protein OS=Oncorhynchus mykiss OX=8022 GN=GSONMT00069049001 PE=4 SV=1	30	17	17	1	30	17	17	11	12	13	7	7	6	9	10	11	9	11	10	13	13	14	11	11	11	11	14	10	11	13	14	11	10	9	14	12	12	11	11	11	11	10	9	10	9	10	9	11	9
tr|A0A060W8B1|A0A060W8B1_ONCMY Apple domain-containing protein OS=Oncorhynchus mykiss OX=8022 GN=GSONMT00069048001 PE=4 SV=1	4	3	3	1	4	3	3	0	0	0	1	0	0	2	1	1	1	1	0	2	2	2	0	0	0	3	3	3	1	2	2	2	1	2	0	3	1	3	3	3	2	1	1	1	0	1	1	0	1
tr|A0A060W8B4|A0A060W8B4_ONCMY Peroxiredoxin-5 OS=Oncorhynchus mykiss OX=8022 GN=GSONMT00069383001 PE=3 SV=1	3	3	3	1	3	3	3	0	0	0	0	0	0	0	0	0	0	0	0	0	0	0	0	0	0	0	0	0	0	0	0	0	0	0	0	0	0	0	0	0	0	0	0	0	0	0	0	0	0
tr|A0A060W8D1|A0A060W8D1_ONCMY Clusterin OS=Oncorhynchus mykiss OX=8022 GN=GSONMT00069078001 PE=3 SV=1;tr|Q5NDK4|Q5NDK4_ONCMY Clusterin OS=Oncorhynchus mykiss OX=8022 PE=2 SV=2;tr|A5CVD6|A5CVD6_ONCMY Clusterin (Fragment) OS=Oncorhynchus mykiss OX=8022 GN=c	5;5;3	3;3;2	3;3;2	3	5	3	3	1	2	1	0	0	0	1	0	2	0	0	1	1	0	0	0	0	0	0	0	0	0	0	0	0	1	0	3	3	2	0	1	0	3	1	1	0	0	0	0	0	0
tr|A0A060W8G0|A0A060W8G0_ONCMY Uncharacterized protein OS=Oncorhynchus mykiss OX=8022 GN=GSONMT00068796001 PE=3 SV=1;tr|A0A060X0I2|A0A060X0I2_ONCMY Uncharacterized protein OS=Oncorhynchus mykiss OX=8022 GN=GSONMT00054284001 PE=3 SV=1	5;3;2;2;2;1;1;1;1;1;1	5;3;2;2;2;1;1;1;1;1;1	5;3;2;2;2;1;1;1;1;1;1	11	5	5	5	0	0	0	0	0	0	0	0	0	0	0	0	0	0	0	0	0	0	4	4	5	0	0	0	1	1	1	0	0	0	1	0	0	0	0	0	0	0	0	0	0	0
tr|A0A060W8K8|A0A060W8K8_ONCMY Peptidase_M14 domain-containing protein OS=Oncorhynchus mykiss OX=8022 GN=GSONMT00082634001 PE=3 SV=1	1	1	1	1	1	1	1	1	0	1	0	0	0	1	1	1	1	1	1	1	1	0	0	0	0	1	1	1	1	1	1	1	1	1	1	1	1	1	1	1	0	1	0	0	0	0	0	0	0
tr|A0A060W917|A0A060W917_ONCMY Uncharacterized protein OS=Oncorhynchus mykiss OX=8022 GN=GSONMT00069475001 PE=4 SV=1	12	12	12	1	12	12	12	9	8	7	7	8	5	7	9	7	7	7	4	7	8	7	6	6	6	8	7	6	10	6	10	7	6	6	7	10	10	7	6	7	8	7	7	5	5	5	6	6	6
tr|A0A060WA91|A0A060WA91_ONCMY Uncharacterized protein OS=Oncorhynchus mykiss OX=8022 GN=GSONMT00070095001 PE=4 SV=1;tr|A0A060XE32|A0A060XE32_ONCMY Uncharacterized protein OS=Oncorhynchus mykiss OX=8022 GN=GSONMT00038343001 PE=4 SV=1	4;2;1	4;2;1	4;2;1	3	4	4	4	0	0	0	0	0	0	0	0	0	0	0	0	0	0	0	0	0	0	0	0	1	0	0	0	1	2	2	0	0	0	0	0	0	0	0	0	0	0	0	0	0	0
tr|A0A060WA97|A0A060WA97_ONCMY Adenosylhomocysteinase OS=Oncorhynchus mykiss OX=8022 GN=GSONMT00070359001 PE=3 SV=1	7;2	7;2	7;2	2	7	7	7	0	0	0	0	0	0	1	0	1	1	0	0	0	0	0	1	1	2	1	2	2	0	0	0	0	1	0	0	0	0	0	1	1	3	0	3	0	0	0	1	0	0
tr|A0A060WAF6|A0A060WAF6_ONCMY Phosphoglycerate mutase OS=Oncorhynchus mykiss OX=8022 GN=GSONMT00070484001 PE=3 SV=1	8;2	2;1	1;0	2	8	2	1	1	1	2	0	0	0	0	0	0	0	0	0	0	0	0	1	2	1	4	6	7	1	1	0	7	6	6	0	0	0	6	4	3	0	0	0	0	0	2	0	0	0
tr|A0A060WAQ6|A0A060WAQ6_ONCMY Uncharacterized protein OS=Oncorhynchus mykiss OX=8022 GN=GSONMT00070448001 PE=3 SV=1	17;1;1;1;1	17;1;1;1;1	3;0;0;0;0	5	17	17	3	4	3	3	3	3	2	5	4	5	4	5	4	6	6	5	7	5	8	10	9	7	8	7	7	6	6	6	6	6	6	7	9	9	5	4	5	11	9	9	7	6	6
tr|A0A060WAZ9|A0A060WAZ9_ONCMY CD44 antigen OS=Oncorhynchus mykiss OX=8022 GN=GSONMT00071040001 PE=4 SV=1	2	2	2	1	2	2	2	1	1	2	1	1	1	1	1	2	2	1	1	1	1	1	0	1	1	1	0	1	2	2	2	2	2	2	2	2	1	2	2	2	2	2	1	1	1	1	1	0	0
tr|A0A060WB67|A0A060WB67_ONCMY Uncharacterized protein OS=Oncorhynchus mykiss OX=8022 GN=GSONMT00065892001 PE=3 SV=1	4;1	4;1	2;0	2	4	4	2	0	0	0	0	0	0	0	0	0	0	0	0	0	0	0	0	0	0	3	3	0	0	0	0	1	2	3	0	0	0	0	0	0	0	0	0	0	0	0	0	0	0
tr|A0A060WBC8|A0A060WBC8_ONCMY Uncharacterized protein OS=Oncorhynchus mykiss OX=8022 GN=GSONMT00070758001 PE=3 SV=1	1	1	1	1	1	1	1	0	0	0	0	0	0	0	0	0	0	0	1	0	0	0	1	0	1	0	0	0	0	0	0	1	1	1	0	0	0	1	0	1	0	0	0	0	0	0	0	0	0
tr|A0A060WBS5|A0A060WBS5_ONCMY Leukotriene A(4) hydrolase OS=Oncorhynchus mykiss OX=8022 GN=GSONMT00071290001 PE=3 SV=1;tr|A0A060WJD0|A0A060WJD0_ONCMY Leukotriene A(4) hydrolase OS=Oncorhynchus mykiss OX=8022 GN=GSONMT00002164001 PE=3 SV=1	1;1	1;1	1;1	2	1	1	1	0	0	0	0	0	0	0	0	0	0	0	0	0	0	0	0	0	0	1	1	0	0	0	0	0	0	0	0	0	0	0	1	1	0	0	0	0	0	0	0	0	0
tr|A0A060WC08|A0A060WC08_ONCMY Phosphoglycerate kinase OS=Oncorhynchus mykiss OX=8022 GN=GSONMT00071424001 PE=3 SV=1	13	13	4	1	13	13	4	2	2	1	0	0	0	0	0	0	0	0	0	0	0	0	4	4	5	6	5	8	0	0	0	11	10	8	0	0	0	4	4	3	0	0	0	1	0	0	0	0	0
tr|A0A060WC68|A0A060WC68_ONCMY Lipocln_cytosolic_FA-bd_dom domain-containing protein OS=Oncorhynchus mykiss OX=8022 GN=GSONMT00071670001 PE=3 SV=1	3	3	3	1	3	3	3	1	1	1	0	0	0	1	1	1	1	1	1	1	1	1	1	1	1	1	1	1	1	1	1	1	1	1	1	1	1	1	1	1	1	0	1	0	0	1	2	1	2
tr|A0A060WCH3|A0A060WCH3_ONCMY DUF1943 domain-containing protein OS=Oncorhynchus mykiss OX=8022 GN=GSONMT00068100001 PE=4 SV=1	21	21	13	1	21	21	13	16	17	17	13	14	14	10	11	11	6	6	5	9	10	11	2	1	2	0	1	0	14	15	13	2	2	2	14	12	12	5	3	4	13	11	12	2	5	3	10	13	12
tr|A0A060WCI5|A0A060WCI5_ONCMY Uncharacterized protein OS=Oncorhynchus mykiss OX=8022 GN=GSONMT00066783001 PE=3 SV=1	10	8	8	1	10	8	8	7	5	6	4	4	5	4	5	3	5	6	6	7	7	7	0	0	1	7	7	7	4	3	6	3	2	3	7	6	6	4	5	4	6	5	5	4	5	2	5	3	5
tr|A0A060WCU1|A0A060WCU1_ONCMY Apolipoprotein M OS=Oncorhynchus mykiss OX=8022 GN=GSONMT00071962001 PE=3 SV=1	3	3	3	1	3	3	3	1	0	1	1	1	1	2	2	0	1	1	1	1	1	1	0	0	0	1	0	0	2	1	2	0	0	0	1	1	1	0	1	1	1	1	1	1	1	1	1	1	1
tr|A0A060WCY0|A0A060WCY0_ONCMY Carboxylic ester hydrolase OS=Oncorhynchus mykiss OX=8022 GN=GSONMT00068494001 PE=3 SV=1	16	16	16	1	16	16	16	9	8	9	6	6	8	8	7	8	8	5	7	7	5	7	9	6	7	9	7	7	9	6	8	7	7	7	9	9	9	8	7	7	7	7	5	7	7	6	7	7	7
tr|A0A060WD93|A0A060WD93_ONCMY Uncharacterized protein OS=Oncorhynchus mykiss OX=8022 GN=GSONMT00067362001 PE=3 SV=1	2	2	2	1	2	2	2	0	0	0	0	0	0	0	0	0	0	0	0	0	0	0	0	0	0	0	0	0	0	0	1	1	0	0	0	0	0	0	0	0	0	0	0	0	0	0	0	0	0
tr|A0A060WDA4|A0A060WDA4_ONCMY Uncharacterized protein OS=Oncorhynchus mykiss OX=8022 GN=GSONMT00068679001 PE=3 SV=1;tr|A0A060WWR8|A0A060WWR8_ONCMY Uncharacterized protein OS=Oncorhynchus mykiss OX=8022 GN=GSONMT00056290001 PE=3 SV=1;tr|A0A060XAU7|A0A060XA	3;3;3;2;1	3;3;3;2;1	3;3;3;2;1	5	3	3	3	0	0	0	0	0	0	0	0	0	0	0	0	0	0	0	0	0	2	3	3	3	0	0	0	1	1	1	0	0	0	1	2	2	0	0	0	0	0	0	0	0	0
tr|A0A060WDJ5|A0A060WDJ5_ONCMY ATP-dependent 6-phosphofructokinase OS=Oncorhynchus mykiss OX=8022 GN=GSONMT00067511001 PE=3 SV=1;tr|A0A060VNK8|A0A060VNK8_ONCMY Uncharacterized protein OS=Oncorhynchus mykiss OX=8022 GN=GSONMT00079753001 PE=4 SV=1;tr|A0A060W	3;2;2	3;2;2	3;2;2	3	3	3	3	0	0	0	0	0	0	0	0	0	0	0	0	0	0	0	0	0	0	0	0	0	0	0	0	0	0	0	0	0	0	0	0	0	0	0	0	0	0	0	0	0	0
tr|A0A060WE68|A0A060WE68_ONCMY Nucleoside diphosphate kinase OS=Oncorhynchus mykiss OX=8022 GN=GSONMT00073564001 PE=3 SV=1	10	10	7	1	10	10	7	5	5	6	4	3	3	2	1	2	1	0	1	0	1	0	5	6	5	5	6	6	1	2	2	8	8	8	2	0	2	4	7	6	2	2	0	2	2	2	1	1	1
tr|A0A060WE89|A0A060WE89_ONCMY Thymosin beta OS=Oncorhynchus mykiss OX=8022 GN=GSONMT00072989001 PE=3 SV=1;sp|P26351|TYB11_ONCMY Thymosin beta-11 OS=Oncorhynchus mykiss OX=8022 PE=1 SV=2;tr|Q9DEQ2|Q9DEQ2_ONCMY Thymosin beta OS=Oncorhynchus mykiss OX=8022 P	5;5;5	2;2;2	2;2;2	3	5	2	2	0	1	0	0	0	0	1	1	1	1	1	1	1	1	0	4	4	4	1	1	1	1	0	0	1	1	1	1	1	1	1	1	1	0	0	0	1	1	1	0	0	0
tr|A0A060WEA8|A0A060WEA8_ONCMY Glucose-6-phosphate isomerase OS=Oncorhynchus mykiss OX=8022 GN=GSONMT00073030001 PE=3 SV=1	9	8	8	1	9	8	8	0	0	1	0	0	1	1	0	0	2	3	2	1	0	1	2	3	2	6	8	6	1	0	1	4	4	5	2	0	1	7	5	6	0	0	0	0	0	0	0	0	0
tr|A0A060WEF7|A0A060WEF7_ONCMY Uncharacterized protein OS=Oncorhynchus mykiss OX=8022 GN=GSONMT00068101001 PE=4 SV=1	7	1	1	1	7	1	1	5	5	4	7	6	7	5	5	5	0	1	1	2	4	4	1	1	0	0	0	0	3	6	6	0	0	0	6	4	5	0	0	0	4	4	4	1	1	1	4	5	5
tr|A0A060WEG5|A0A060WEG5_ONCMY Sulfhydryl oxidase OS=Oncorhynchus mykiss OX=8022 GN=GSONMT00073488001 PE=3 SV=1	3	3	3	1	3	3	3	1	3	2	0	0	0	1	0	0	0	0	0	2	1	2	0	0	0	0	0	1	0	0	0	0	0	0	2	1	2	0	0	0	0	0	1	1	0	0	0	0	0
tr|A0A060WEK7|A0A060WEK7_ONCMY Uncharacterized protein OS=Oncorhynchus mykiss OX=8022 GN=GSONMT00073223001 PE=3 SV=1;tr|A0A060W4G5|A0A060W4G5_ONCMY Uncharacterized protein OS=Oncorhynchus mykiss OX=8022 GN=GSONMT00066265001 PE=3 SV=1	3;2	3;2	3;2	2	3	3	3	0	0	0	0	0	0	0	0	0	0	0	0	0	0	0	0	0	0	2	1	1	0	0	0	2	1	3	0	0	0	0	0	0	0	0	0	0	0	1	0	0	0
tr|A0A060WER0|A0A060WER0_ONCMY Uncharacterized protein OS=Oncorhynchus mykiss OX=8022 GN=GSONMT00073805001 PE=4 SV=1	8	1	1	1	8	1	1	3	1	1	1	1	1	5	5	6	7	7	7	5	5	6	3	5	4	5	5	5	4	4	1	3	5	5	5	7	6	3	2	5	4	3	3	3	2	1	1	2	2
tr|A0A060WFI6|A0A060WFI6_ONCMY ZnMc domain-containing protein OS=Oncorhynchus mykiss OX=8022 GN=GSONMT00074653001 PE=3 SV=1	4	4	4	1	4	4	4	0	0	0	0	0	0	0	0	0	0	0	0	0	0	0	0	0	0	0	0	0	0	0	0	2	0	1	0	0	0	1	2	1	0	0	0	0	0	0	0	0	0
tr|A0A060WFS6|A0A060WFS6_ONCMY Apolipoprotein H OS=Oncorhynchus mykiss OX=8022 GN=GSONMT00070431001 PE=4 SV=1	12	12	7	1	12	12	7	7	6	6	4	5	6	7	5	7	7	6	7	6	5	6	2	2	2	4	5	5	6	6	6	5	6	5	4	5	7	4	4	4	6	5	5	3	3	4	5	5	5
tr|A0A060WFW3|A0A060WFW3_ONCMY Uncharacterized protein OS=Oncorhynchus mykiss OX=8022 GN=GSONMT00069191001 PE=4 SV=1	27	24	3	1	27	24	3	9	8	6	10	8	9	10	8	6	8	7	8	10	7	7	9	10	14	10	10	12	17	18	18	15	16	16	7	6	8	12	14	14	10	8	8	13	15	9	8	9	9
tr|A0A060WGE3|A0A060WGE3_ONCMY Uncharacterized protein OS=Oncorhynchus mykiss OX=8022 GN=GSONMT00074714001 PE=4 SV=1	3	3	3	1	3	3	3	0	0	0	0	0	0	0	0	0	0	0	0	0	0	0	0	0	0	1	1	1	0	0	0	1	3	2	0	0	0	0	0	0	0	0	0	0	0	0	0	0	0
tr|A0A060WGR2|A0A060WGR2_ONCMY L-lactate dehydrogenase OS=Oncorhynchus mykiss OX=8022 GN=GSONMT00071258001 PE=3 SV=1	9	9	2	1	9	9	2	0	0	0	0	0	1	1	1	1	0	0	0	0	0	0	1	3	4	4	4	2	1	0	3	3	3	3	1	0	1	4	4	3	0	0	0	0	0	0	0	0	0
tr|A0A060WGU6|A0A060WGU6_ONCMY Angiotensin 1-10 OS=Oncorhynchus mykiss OX=8022 GN=GSONMT00069777001 PE=3 SV=1	21;7	21;7	21;7	2	21	21	21	8	9	8	9	8	8	10	9	12	10	10	10	8	8	7	14	12	16	15	14	14	9	8	8	10	14	12	9	10	10	13	12	15	11	10	11	10	11	10	8	9	10
tr|A0A060WHC7|A0A060WHC7_ONCMY Clusterin OS=Oncorhynchus mykiss OX=8022 GN=GSONMT00071723001 PE=3 SV=1	11;1	11;1	9;1	2	11	11	9	9	8	10	4	4	5	4	5	5	2	2	3	3	3	2	1	1	2	1	0	0	3	1	1	0	0	0	6	7	7	0	4	1	4	2	1	1	1	0	2	2	2
tr|A0A060WHF0|A0A060WHF0_ONCMY Activation peptide OS=Oncorhynchus mykiss OX=8022 GN=GSONMT00071754001 PE=4 SV=1;tr|Q5DVP8|Q5DVP8_ONCMY Plasminogen OS=Oncorhynchus mykiss OX=8022 GN=plg PE=2 SV=1	36;32	36;32	22;19	2	36	36	22	18	18	19	13	15	14	19	20	18	17	15	17	20	19	18	18	16	18	25	24	22	18	19	17	20	19	17	17	21	19	24	22	23	20	20	19	20	17	19	17	14	14
tr|A0A060WHP8|A0A060WHP8_ONCMY Apolipoprotein H OS=Oncorhynchus mykiss OX=8022 GN=GSONMT00070432001 PE=4 SV=1	3	2	2	1	3	2	2	1	0	1	0	0	0	0	0	0	0	0	0	0	0	0	0	0	0	2	2	1	0	0	0	0	0	0	0	0	0	0	0	1	0	0	0	0	0	0	0	0	0
tr|A0A060WHT8|A0A060WHT8_ONCMY Uncharacterized protein OS=Oncorhynchus mykiss OX=8022 GN=GSONMT00070499001 PE=3 SV=1;tr|Q7T2W9|Q7T2W9_ONCMY Complement protein component C7-1 OS=Oncorhynchus mykiss OX=8022 GN=C7-1 PE=2 SV=1	23;19	23;19	22;18	2	23	23	22	0	0	0	0	0	0	0	0	0	1	0	0	1	1	0	4	7	7	12	16	13	1	0	0	7	7	6	0	0	1	12	14	12	1	1	0	3	3	2	0	0	0
tr|A0A060WI24|A0A060WI24_ONCMY ATP-dependent 6-phosphofructokinase OS=Oncorhynchus mykiss OX=8022 GN=GSONMT00075887001 PE=3 SV=1	2	2	2	1	2	2	2	0	0	0	0	0	0	0	0	0	0	0	0	0	0	0	0	0	0	0	0	1	0	0	0	0	1	0	0	0	0	0	0	0	0	0	0	0	0	0	0	0	0
tr|A0A060WI78|A0A060WI78_ONCMY Uncharacterized protein OS=Oncorhynchus mykiss OX=8022 GN=GSONMT00076185001 PE=4 SV=1	9	4	4	1	9	4	4	6	7	6	4	4	5	4	5	6	4	4	6	6	6	4	2	1	3	4	4	4	7	6	5	5	4	4	6	8	8	3	3	3	6	5	7	3	4	2	3	6	5
tr|A0A060WIC1|A0A060WIC1_ONCMY Antithrombin-III OS=Oncorhynchus mykiss OX=8022 GN=GSONMT00072402001 PE=3 SV=1	13	7	7	1	13	7	7	5	4	4	5	5	7	3	4	2	2	2	4	2	3	2	1	1	1	4	1	4	3	1	2	6	7	6	2	1	2	5	5	6	1	1	2	2	2	2	1	1	2
tr|A0A060WJ48|A0A060WJ48_ONCMY SERPIN domain-containing protein OS=Oncorhynchus mykiss OX=8022 GN=GSONMT00076545001 PE=3 SV=1	3	3	3	1	3	3	3	0	1	1	0	0	0	1	1	0	1	0	1	1	1	0	0	0	0	2	1	1	2	1	1	1	0	2	0	2	0	1	1	1	0	0	1	0	0	0	0	0	0
tr|A0A060WJ96|A0A060WJ96_ONCMY NTR domain-containing protein OS=Oncorhynchus mykiss OX=8022 GN=GSONMT00061487001 PE=4 SV=1	32	32	32	1	32	32	32	9	12	8	21	18	18	17	21	18	22	20	19	17	16	23	12	11	11	13	16	13	17	14	16	19	17	18	11	13	10	15	15	13	17	16	19	14	14	11	16	15	19
tr|A0A060WJB1|A0A060WJB1_ONCMY B30.2/SPRY domain-containing protein OS=Oncorhynchus mykiss OX=8022 GN=GSONMT00061512001 PE=4 SV=1	16	16	16	1	16	16	16	12	11	13	8	9	10	8	8	9	11	11	12	11	11	11	9	10	10	9	8	8	10	10	10	7	6	6	9	8	9	8	7	8	8	10	9	10	9	8	9	11	9
tr|A0A060WJM4|A0A060WJM4_ONCMY Uncharacterized protein OS=Oncorhynchus mykiss OX=8022 GN=GSONMT00073226001 PE=4 SV=1;tr|A0A060WLG4|A0A060WLG4_ONCMY Uncharacterized protein OS=Oncorhynchus mykiss OX=8022 GN=GSONMT00073217001 PE=4 SV=1;tr|A0A060WEK3|A0A060WE	2;1;1;1	2;1;1;1	2;1;1;1	4	2	2	2	0	0	0	0	0	0	0	0	0	0	0	0	0	0	0	0	0	0	1	0	1	0	0	0	0	0	1	0	0	0	0	0	0	0	0	0	0	0	0	0	0	0
tr|A0A060WKF1|A0A060WKF1_ONCMY Uncharacterized protein OS=Oncorhynchus mykiss OX=8022 GN=GSONMT00028424001 PE=3 SV=1;tr|A0A060X7I7|A0A060X7I7_ONCMY Uncharacterized protein OS=Oncorhynchus mykiss OX=8022 GN=GSONMT00046303001 PE=3 SV=1	5;4	2;1	2;1	2	5	2	2	0	0	0	0	0	0	0	0	0	0	0	0	0	0	0	0	0	0	4	1	1	0	0	0	3	3	3	0	0	0	0	0	0	0	0	0	0	0	0	0	0	0
tr|A0A060WKG4|A0A060WKG4_ONCMY Creatine kinase OS=Oncorhynchus mykiss OX=8022 GN=GSONMT00028450001 PE=3 SV=1	18	10	2	1	18	10	2	3	3	2	0	0	0	0	0	0	0	0	0	0	0	0	7	8	7	9	11	10	0	1	0	10	11	12	0	0	0	5	6	6	0	0	0	2	2	1	0	0	0
tr|A0A060WKT8|A0A060WKT8_ONCMY Sulfhydryl oxidase OS=Oncorhynchus mykiss OX=8022 GN=GSONMT00033368001 PE=3 SV=1	2	2	2	1	2	2	2	0	0	0	0	0	0	0	0	0	0	0	0	0	0	0	0	0	0	0	0	0	0	0	0	1	0	0	2	1	1	0	0	0	0	1	1	0	0	0	0	0	0
tr|A0A060WL90|A0A060WL90_ONCMY Uncharacterized protein OS=Oncorhynchus mykiss OX=8022 GN=GSONMT00038976001 PE=4 SV=1;tr|A0A060WUE0|A0A060WUE0_ONCMY Heme oxygenase (biliverdin-producing) OS=Oncorhynchus mykiss OX=8022 GN=GSONMT00059084001 PE=3 SV=1	2;2	2;2	2;2	2	2	2	2	0	0	0	0	0	0	0	0	0	0	0	0	0	0	0	0	0	0	1	2	1	0	0	0	0	0	0	0	0	0	0	0	0	0	0	0	0	0	0	0	0	0
tr|A0A060WLF9|A0A060WLF9_ONCMY Galectin OS=Oncorhynchus mykiss OX=8022 GN=GSONMT00023714001 PE=4 SV=1;tr|Q8QGB1|Q8QGB1_ONCMY Galectin OS=Oncorhynchus mykiss OX=8022 PE=2 SV=1	4;4;1;1;1	4;4;1;1;1	4;4;1;1;1	5	4	4	4	0	0	0	0	0	0	0	0	0	0	0	0	0	0	0	0	0	0	0	0	0	0	0	0	0	0	0	0	0	0	0	1	0	0	0	0	0	0	0	0	0	0
tr|A0A060WLI0|A0A060WLI0_ONCMY Uncharacterized protein OS=Oncorhynchus mykiss OX=8022 GN=GSONMT00015723001 PE=3 SV=1	5	1	1	1	5	1	1	0	0	0	0	0	0	0	0	0	0	0	0	0	0	0	0	0	1	4	3	3	0	0	0	2	1	3	0	0	0	0	0	0	0	0	0	0	0	0	0	0	0
tr|A0A060WMG2|A0A060WMG2_ONCMY 14_3_3 domain-containing protein OS=Oncorhynchus mykiss OX=8022 GN=GSONMT00043199001 PE=3 SV=1;tr|A0A060Y1V1|A0A060Y1V1_ONCMY 14_3_3 domain-containing protein OS=Oncorhynchus mykiss OX=8022 GN=GSONMT00031599001 PE=3 SV=1;sp|Q	4;3;3	2;2;2	2;2;2	3	4	2	2	1	1	1	0	0	1	1	1	1	1	0	1	0	1	1	0	0	0	2	2	2	1	1	1	1	1	2	1	1	0	1	1	1	1	1	1	0	0	0	0	0	0
tr|A0A060WN18|A0A060WN18_ONCMY Uncharacterized protein (Fragment) OS=Oncorhynchus mykiss OX=8022 GN=GSONMT00031645001 PE=3 SV=1	24;5;3	3;0;0	2;0;0	3	24	3	2	20	17	19	15	14	15	15	15	18	14	15	16	15	15	15	11	13	11	11	12	13	13	15	14	13	14	15	16	13	16	13	10	12	16	15	15	11	10	8	13	15	13
tr|A0A060WN38|A0A060WN38_ONCMY A2M_N_2 domain-containing protein OS=Oncorhynchus mykiss OX=8022 GN=GSONMT00031687001 PE=4 SV=1	16	16	10	1	16	16	10	9	10	10	6	6	6	8	9	8	5	6	7	10	10	7	7	6	5	6	6	7	9	8	8	7	8	8	9	10	8	7	5	5	8	7	8	7	6	6	8	7	10
tr|A0A060WN44|A0A060WN44_ONCMY C1q domain-containing protein OS=Oncorhynchus mykiss OX=8022 GN=GSONMT00018332001 PE=4 SV=1	7	7	7	1	7	7	7	0	0	0	0	0	0	0	1	0	1	2	2	1	1	1	4	4	5	4	4	5	0	0	0	2	0	1	0	0	1	2	0	0	0	0	0	2	3	3	0	0	0
tr|A0A060WNE8|A0A060WNE8_ONCMY Coagulation factor III OS=Oncorhynchus mykiss OX=8022 GN=GSONMT00003275001 PE=3 SV=1	1	1	1	1	1	1	1	1	0	0	0	0	0	0	0	0	0	0	0	1	0	0	0	0	0	0	0	0	0	0	0	0	0	0	0	0	1	0	0	0	0	0	0	0	0	0	0	0	0
tr|A0A060WP02|A0A060WP02_ONCMY Uncharacterized protein OS=Oncorhynchus mykiss OX=8022 GN=GSONMT00058366001 PE=4 SV=1	4	4	4	1	4	4	4	1	1	1	0	0	0	1	1	2	2	0	1	0	1	0	0	0	0	0	0	0	0	0	0	1	1	1	2	2	2	1	1	2	0	0	0	0	0	0	0	0	1
tr|A0A060WPI4|A0A060WPI4_ONCMY Uncharacterized protein OS=Oncorhynchus mykiss OX=8022 GN=GSONMT00075505001 PE=3 SV=1;tr|A0A060X1Y3|A0A060X1Y3_ONCMY Uncharacterized protein OS=Oncorhynchus mykiss OX=8022 GN=GSONMT00055129001 PE=3 SV=1;tr|A0A060Z6P8|A0A060Z6	2;2;1;1	2;2;1;1	2;2;1;1	4	2	2	2	0	0	0	0	0	0	0	0	0	0	0	0	0	0	0	0	0	0	0	0	0	0	0	0	0	0	0	0	0	0	0	1	0	0	0	0	0	0	0	0	0	0
tr|A0A060WPL9|A0A060WPL9_ONCMY Uncharacterized protein OS=Oncorhynchus mykiss OX=8022 GN=GSONMT00000306001 PE=4 SV=1	1	1	1	1	1	1	1	1	1	1	0	0	0	1	1	1	1	1	1	1	1	1	0	0	0	1	1	1	1	1	1	0	0	0	1	1	1	0	0	0	1	1	1	0	0	0	1	1	1
tr|A0A060WQM5|A0A060WQM5_ONCMY Anaphylatoxin-like domain-containing protein OS=Oncorhynchus mykiss OX=8022 GN=GSONMT00061490001 PE=4 SV=1	17	17	17	1	17	17	17	4	4	5	10	12	12	10	12	11	12	16	15	12	14	10	3	5	5	12	11	12	9	8	7	11	10	11	6	7	7	11	10	11	11	11	10	5	2	2	8	9	11
tr|A0A060WQP2|A0A060WQP2_ONCMY 4-alpha-glucanotransferase OS=Oncorhynchus mykiss OX=8022 GN=GSONMT00063312001 PE=4 SV=1;tr|A0A060WT58|A0A060WT58_ONCMY 4-alpha-glucanotransferase OS=Oncorhynchus mykiss OX=8022 GN=GSONMT00034361001 PE=4 SV=1	2;2	2;2	2;2	2	2	2	2	0	0	0	0	0	0	0	0	0	0	0	0	0	0	0	0	0	0	0	0	0	0	0	0	0	0	1	0	0	0	0	0	0	0	0	0	0	0	0	0	0	0
tr|A0A060WQS2|A0A060WQS2_ONCMY L-lactate dehydrogenase OS=Oncorhynchus mykiss OX=8022 GN=GSONMT00002192001 PE=3 SV=1	9;3;2;2;1	2;0;0;0;0	2;0;0;0;0	5	9	2	2	0	0	0	0	1	0	1	1	1	0	0	0	0	0	1	1	2	4	4	4	2	1	0	2	3	3	3	1	0	1	5	3	3	0	1	1	0	0	0	0	0	0
tr|A0A060WRB3|A0A060WRB3_ONCMY C-type lectin domain-containing protein OS=Oncorhynchus mykiss OX=8022 GN=GSONMT00024049001 PE=4 SV=1;tr|A0A060WQ03|A0A060WQ03_ONCMY C-type lectin domain-containing protein OS=Oncorhynchus mykiss OX=8022 GN=GSONMT00024047001	3;2;2	3;2;2	3;2;2	3	3	3	3	0	0	0	3	2	2	1	3	2	0	0	0	0	0	1	0	0	0	1	1	2	3	2	3	1	1	1	1	1	1	0	0	0	0	0	0	0	0	1	0	0	0
tr|A0A060WRB4|A0A060WRB4_ONCMY Actin-depolymerizing factor OS=Oncorhynchus mykiss OX=8022 GN=GSONMT00013316001 PE=3 SV=1	14;2	14;2	6;0	2	14	14	6	0	0	0	1	1	2	0	0	1	0	0	0	2	1	1	3	5	4	13	8	12	1	0	1	4	6	5	0	0	0	5	11	8	0	0	0	0	1	0	0	0	0
tr|A0A060WRN4|A0A060WRN4_ONCMY Uncharacterized protein OS=Oncorhynchus mykiss OX=8022 GN=GSONMT00036735001 PE=3 SV=1	1	1	1	1	1	1	1	0	0	0	0	0	0	0	0	0	0	0	0	0	0	0	0	0	0	0	0	1	0	0	0	0	0	0	0	0	0	1	1	1	0	0	0	0	0	0	0	0	0
tr|A0A060WRW9|A0A060WRW9_ONCMY MG1 domain-containing protein OS=Oncorhynchus mykiss OX=8022 GN=GSONMT00061491001 PE=4 SV=1	3	3	3	1	3	3	3	1	1	1	1	1	0	3	3	3	3	3	2	1	1	1	0	1	1	2	1	1	3	0	1	1	3	3	0	0	1	2	3	3	2	1	2	0	0	0	2	1	3
tr|A0A060WRX4|A0A060WRX4_ONCMY C1q domain-containing protein OS=Oncorhynchus mykiss OX=8022 GN=GSONMT00038951001 PE=4 SV=1	3	3	3	1	3	3	3	0	1	0	2	0	1	1	1	1	2	2	2	2	2	3	0	0	0	2	2	3	2	1	1	1	2	1	2	2	2	2	2	3	2	0	1	3	2	3	1	0	0
tr|A0A060WSH2|A0A060WSH2_ONCMY Lipocln_cytosolic_FA-bd_dom domain-containing protein OS=Oncorhynchus mykiss OX=8022 GN=GSONMT00004110001 PE=3 SV=1	3;1	3;1	3;1	2	3	3	3	2	2	2	0	1	1	1	1	0	0	0	0	1	1	1	0	0	0	0	0	0	1	1	0	2	1	1	2	2	2	1	1	1	0	0	1	0	0	0	0	1	0
tr|A0A060WT85|A0A060WT85_ONCMY Uncharacterized protein OS=Oncorhynchus mykiss OX=8022 GN=GSONMT00038941001 PE=4 SV=1	4	4	4	1	4	4	4	1	2	2	2	2	2	1	1	1	1	1	1	2	1	2	0	0	0	1	1	1	1	1	1	1	1	1	1	1	1	1	1	1	2	1	2	1	1	1	1	1	1
tr|A0A060WTP0|A0A060WTP0_ONCMY Myosin motor domain-containing protein OS=Oncorhynchus mykiss OX=8022 GN=GSONMT00017975001 PE=3 SV=1;tr|A0A060YPQ8|A0A060YPQ8_ONCMY Uncharacterized protein OS=Oncorhynchus mykiss OX=8022 GN=GSONMT00056531001 PE=3 SV=1	9;9	3;3	0;0	2	9	3	0	0	0	0	0	0	0	0	0	0	0	0	0	0	0	0	0	0	1	7	4	5	0	0	0	4	4	5	0	0	0	0	0	0	0	0	0	0	0	0	0	0	0
tr|A0A060WUI1|A0A060WUI1_ONCMY Fructose-bisphosphate aldolase OS=Oncorhynchus mykiss OX=8022 GN=GSONMT00043637001 PE=3 SV=1	25;1	25;1	8;1	2	25	25	8	7	8	5	4	3	5	1	1	1	0	0	0	2	1	1	10	11	14	16	17	16	2	2	3	17	17	15	0	0	1	12	10	8	0	0	0	5	6	5	0	0	0
tr|A0A060WUN3|A0A060WUN3_ONCMY Uncharacterized protein OS=Oncorhynchus mykiss OX=8022 GN=GSONMT00031647001 PE=3 SV=1	35	35	12	1	35	35	12	31	27	30	21	19	19	23	22	24	22	24	25	24	22	22	15	17	15	16	17	18	20	23	21	20	21	21	23	20	23	17	15	17	21	21	21	15	15	13	21	23	21
tr|A0A060WUQ0|A0A060WUQ0_ONCMY A2M_recep domain-containing protein OS=Oncorhynchus mykiss OX=8022 GN=GSONMT00031688001 PE=4 SV=1	4	3	1	1	4	3	1	2	3	2	1	1	1	1	2	1	0	0	0	1	1	1	2	2	1	2	2	2	1	1	1	2	1	1	2	2	1	0	1	1	2	2	1	1	1	1	1	1	0
tr|A0A060WUV2|A0A060WUV2_ONCMY Uncharacterized protein OS=Oncorhynchus mykiss OX=8022 GN=GSONMT00017464001 PE=4 SV=1	14;5;4;2	14;5;4;2	6;0;4;0	4	14	14	6	7	6	5	5	5	5	8	7	8	0	0	0	8	8	9	4	4	3	3	0	1	4	1	1	0	0	0	0	2	0	2	2	3	3	2	2	0	0	0	0	0	0
tr|A0A060WV84|A0A060WV84_ONCMY Fructose-bisphosphate aldolase OS=Oncorhynchus mykiss OX=8022 GN=GSONMT00009795001 PE=3 SV=1	15	5	2	1	15	5	2	2	3	2	2	1	2	1	1	1	0	0	0	2	0	0	4	4	5	8	10	11	2	2	3	10	9	8	0	0	1	8	7	6	0	0	0	3	4	4	0	0	0
tr|A0A060WVF8|A0A060WVF8_ONCMY Cadherin-1 OS=Oncorhynchus mykiss OX=8022 GN=GSONMT00017467001 PE=4 SV=1	9	1	1	1	9	1	1	3	3	2	3	3	2	5	4	5	0	0	0	4	4	5	2	1	1	3	0	1	2	0	0	0	0	0	0	1	0	2	1	1	2	1	1	0	0	0	0	0	0
tr|A0A060WVR1|A0A060WVR1_ONCMY Uncharacterized protein OS=Oncorhynchus mykiss OX=8022 GN=GSONMT00017586001 PE=4 SV=1	4	2	2	1	4	2	2	0	0	0	0	0	0	0	0	0	0	0	0	0	0	0	0	0	0	0	0	0	2	0	0	0	0	1	2	2	2	0	1	1	1	0	0	0	0	0	0	0	0
tr|A0A060WW01|A0A060WW01_ONCMY MG3 domain-containing protein OS=Oncorhynchus mykiss OX=8022 GN=GSONMT00031648001 PE=4 SV=1	6	4	4	1	6	4	4	5	5	5	4	3	3	2	4	3	3	4	3	3	4	4	0	0	0	1	3	3	3	4	3	1	2	1	2	3	3	1	2	1	2	3	2	3	3	3	5	3	3
tr|A0A060WWP9|A0A060WWP9_ONCMY Ig-like domain-containing protein OS=Oncorhynchus mykiss OX=8022 GN=GSONMT00063093001 PE=4 SV=1	2	1	1	1	2	1	1	1	0	0	1	1	1	0	0	0	0	0	0	0	0	0	0	0	0	1	1	1	0	0	0	0	0	0	0	0	0	0	0	1	0	0	0	0	0	0	0	0	0
tr|A0A060WWQ3|A0A060WWQ3_ONCMY Uncharacterized protein OS=Oncorhynchus mykiss OX=8022 GN=GSONMT00063099001 PE=4 SV=1	3	2	1	1	3	2	1	2	2	2	2	2	3	2	2	2	1	1	1	1	1	1	2	1	3	2	1	1	3	3	3	1	2	1	2	3	3	3	2	2	2	2	1	1	0	1	1	1	1
tr|A0A060WX05|A0A060WX05_ONCMY Uncharacterized protein OS=Oncorhynchus mykiss OX=8022 GN=GSONMT00034657001 PE=4 SV=1	11	11	2	1	11	11	2	4	3	3	2	2	1	4	6	3	1	2	2	4	3	3	1	1	3	3	4	2	7	3	6	2	2	2	3	7	5	3	5	4	0	0	0	0	0	0	1	1	1
tr|A0A060WX26|A0A060WX26_ONCMY Antithrombin-III OS=Oncorhynchus mykiss OX=8022 GN=GSONMT00053437001 PE=3 SV=1	14	14	8	1	14	14	8	5	6	5	6	4	7	3	2	3	6	8	9	1	2	1	1	1	1	5	5	6	3	1	2	8	6	6	1	2	2	4	3	3	1	1	1	1	1	1	1	1	1
tr|A0A060WX43|A0A060WX43_ONCMY 6-phosphogluconate dehydrogenase, decarboxylating OS=Oncorhynchus mykiss OX=8022 GN=GSONMT00001777001 PE=3 SV=1	10	10	10	1	10	10	10	0	0	0	0	0	0	0	0	0	0	0	0	0	0	0	1	0	1	8	9	9	0	0	0	5	4	4	0	0	0	3	3	4	0	0	0	0	0	0	0	0	0
tr|A0A060WX77|A0A060WX77_ONCMY SERPIN domain-containing protein OS=Oncorhynchus mykiss OX=8022 GN=GSONMT00061635001 PE=3 SV=1	8	8	8	1	8	8	8	6	6	7	4	5	4	3	3	3	2	2	1	1	3	2	1	2	1	5	5	4	3	4	5	4	5	3	5	4	4	5	4	4	3	1	3	2	2	2	5	3	3
tr|A0A060WX95|A0A060WX95_ONCMY Uncharacterized protein OS=Oncorhynchus mykiss OX=8022 GN=GSONMT00029674001 PE=3 SV=1;tr|A0A060VW86|A0A060VW86_ONCMY Uncharacterized protein OS=Oncorhynchus mykiss OX=8022 GN=GSONMT00064195001 PE=3 SV=1;tr|A0A060X559|A0A060X5	5;4;4;3;3;2;1;1;1;1	2;1;2;2;1;1;1;1;1;1	0;0;0;0;0;0;0;0;0;0	10	5	2	0	1	0	0	0	0	0	1	1	0	1	2	1	0	0	0	0	0	0	0	1	0	0	0	0	0	0	0	0	0	0	0	0	0	0	0	0	0	0	0	0	0	0
tr|A0A060WXK2|A0A060WXK2_ONCMY Uncharacterized protein OS=Oncorhynchus mykiss OX=8022 GN=GSONMT00028285001 PE=4 SV=1	19;1	19;1	14;0	2	19	19	14	14	15	14	9	10	12	10	13	13	9	11	11	11	11	12	9	8	9	10	11	11	12	13	10	11	12	13	12	13	14	9	9	11	10	11	12	8	9	7	9	12	9
tr|A0A060WXM9|A0A060WXM9_ONCMY 14_3_3 domain-containing protein OS=Oncorhynchus mykiss OX=8022 GN=GSONMT00012009001 PE=3 SV=1;tr|A0A060XH76|A0A060XH76_ONCMY 14_3_3 domain-containing protein OS=Oncorhynchus mykiss OX=8022 GN=GSONMT00052227001 PE=3 SV=1;sp|Q	4;4;4;1;1;1;1;1;1;1;1;1;1;1	4;4;4;1;1;1;1;1;1;1;1;1;1;1	2;2;2;0;0;0;0;0;0;0;0;0;0;0	14	4	4	2	1	1	1	0	0	1	1	1	1	1	0	1	0	1	1	0	0	0	1	2	2	1	1	1	2	1	1	1	1	0	1	1	1	1	1	1	0	0	0	0	0	0
tr|A0A060WXT1|A0A060WXT1_ONCMY Ig-like domain-containing protein OS=Oncorhynchus mykiss OX=8022 GN=GSONMT00063097001 PE=4 SV=1;tr|A0A060YV49|A0A060YV49_ONCMY Ig-like domain-containing protein OS=Oncorhynchus mykiss OX=8022 GN=GSONMT00026293001 PE=4 SV=1	5;3	5;3	1;0	2	5	5	1	4	4	3	1	1	2	2	3	4	2	3	3	1	1	2	1	1	1	1	1	1	3	4	2	1	3	3	1	4	3	3	4	4	1	1	1	1	2	1	2	2	2
tr|A0A060WYE5|A0A060WYE5_ONCMY CULLIN_2 domain-containing protein OS=Oncorhynchus mykiss OX=8022 GN=GSONMT00003054001 PE=3 SV=1	1	1	1	1	1	1	1	1	1	1	1	1	1	1	1	1	0	1	0	1	1	1	0	0	0	1	0	1	1	0	1	1	1	1	1	1	1	1	1	1	1	1	1	0	0	0	1	1	1
tr|A0A060WYV9|A0A060WYV9_ONCMY Uncharacterized protein OS=Oncorhynchus mykiss OX=8022 GN=GSONMT00063579001 PE=3 SV=1;tr|E0WDA3|E0WDA3_ONCMY Parvalbumin beta-2 OS=Oncorhynchus mykiss OX=8022 GN=pvalb2 PE=2 SV=1	7;6	7;6	1;0	2	7	7	1	3	4	4	1	2	2	0	0	0	0	0	0	0	0	0	0	0	0	3	3	3	0	0	0	6	4	5	0	0	0	3	3	2	0	0	0	0	0	0	0	0	0
tr|A0A060WZ33|A0A060WZ33_ONCMY SRCR domain-containing protein OS=Oncorhynchus mykiss OX=8022 GN=GSONMT00057817001 PE=4 SV=1	1	1	1	1	1	1	1	0	0	0	0	0	0	0	0	0	0	0	0	0	0	0	0	0	0	0	0	0	1	0	0	0	0	0	0	0	0	0	0	0	0	0	0	0	0	0	0	0	0
tr|A0A060WZT4|A0A060WZT4_ONCMY Uncharacterized protein OS=Oncorhynchus mykiss OX=8022 GN=GSONMT00063154001 PE=3 SV=1	1	1	1	1	1	1	1	0	0	0	0	0	0	0	0	0	0	0	0	0	0	0	0	0	0	0	0	0	0	0	0	0	0	0	0	0	0	0	0	1	0	0	0	0	0	0	0	0	0
tr|A0A060WZY4|A0A060WZY4_ONCMY Uncharacterized protein OS=Oncorhynchus mykiss OX=8022 GN=GSONMT00052000001 PE=4 SV=1	5	5	2	1	5	5	2	3	4	3	4	4	5	3	3	3	2	2	2	4	5	4	2	2	2	3	3	2	2	4	3	3	3	4	3	4	4	2	2	2	4	5	4	3	2	2	4	2	2
tr|A0A060X083|A0A060X083_ONCMY Ig-like domain-containing protein OS=Oncorhynchus mykiss OX=8022 GN=GSONMT00053002001 PE=4 SV=1;tr|A0A060X742|A0A060X742_ONCMY Ig-like domain-containing protein OS=Oncorhynchus mykiss OX=8022 GN=GSONMT00053005001 PE=4 SV=1;tr	6;5;4	6;5;4	6;5;4	3	6	6	6	2	2	3	0	1	1	0	0	0	3	2	2	1	1	1	2	3	3	2	2	1	3	4	3	1	1	2	1	2	2	1	3	2	1	1	1	0	0	0	1	2	2
tr|A0A060X095|A0A060X095_ONCMY FXYD domain-containing ion transport regulator OS=Oncorhynchus mykiss OX=8022 GN=GSONMT00043693001 PE=3 SV=1;tr|A0A060XRY8|A0A060XRY8_ONCMY FXYD domain-containing ion transport regulator OS=Oncorhynchus mykiss OX=8022 GN=GSON	2;1	2;1	2;1	2	2	2	2	0	0	1	0	0	0	0	0	0	0	0	0	0	0	0	0	0	0	0	0	0	0	1	1	0	0	0	1	0	0	0	0	0	0	0	0	0	0	0	0	0	0
tr|A0A060X0D1|A0A060X0D1_ONCMY Uncharacterized protein OS=Oncorhynchus mykiss OX=8022 GN=GSONMT00022621001 PE=4 SV=1	17;2	17;2	17;2	2	17	17	17	14	15	14	11	11	8	12	13	11	11	13	11	8	11	11	3	4	3	8	9	8	12	9	12	9	10	8	13	13	13	12	12	11	10	10	10	8	10	7	11	10	12
tr|A0A060X0G1|A0A060X0G1_ONCMY RNAse_Pc domain-containing protein OS=Oncorhynchus mykiss OX=8022 GN=GSONMT00032415001 PE=3 SV=1	3	3	3	1	3	3	3	1	1	2	0	0	1	1	1	1	2	1	1	1	1	1	0	0	0	0	0	0	0	1	0	0	0	0	2	2	1	0	0	0	2	1	1	0	0	0	1	0	0
tr|A0A060X0J4|A0A060X0J4_ONCMY Protein S100 OS=Oncorhynchus mykiss OX=8022 GN=GSONMT00036132001 PE=3 SV=1;tr|A0A060VPB0|A0A060VPB0_ONCMY Protein S100 OS=Oncorhynchus mykiss OX=8022 GN=GSONMT00064289001 PE=3 SV=1	2;2	2;2	2;2	2	2	2	2	0	0	0	1	1	1	1	2	1	1	0	1	1	1	2	0	0	0	0	0	0	1	0	0	0	0	0	1	1	1	0	0	0	1	1	1	0	0	0	1	0	2
tr|A0A060X1M6|A0A060X1M6_ONCMY SelP_N domain-containing protein OS=Oncorhynchus mykiss OX=8022 GN=GSONMT00004853001 PE=4 SV=1;tr|A0A068QM76|A0A068QM76_ONCMY Selenoprotein Pa OS=Oncorhynchus mykiss OX=8022 GN=SelPa PE=2 SV=1	1;1	1;1	1;1	2	1	1	1	1	0	0	0	0	0	0	0	0	0	0	0	0	0	0	0	0	0	0	0	0	0	0	0	0	0	0	0	0	0	0	0	0	0	0	0	0	0	0	0	0	0
tr|A0A060X259|A0A060X259_ONCMY Cholesteryl ester transfer protein OS=Oncorhynchus mykiss OX=8022 GN=GSONMT00026924001 PE=3 SV=1	4	4	4	1	4	4	4	1	2	1	0	0	0	2	2	2	0	0	0	1	1	0	0	0	0	0	0	0	3	2	1	1	2	2	4	2	3	1	3	2	2	1	0	1	1	1	1	0	2
tr|A0A060X2K3|A0A060X2K3_ONCMY Uncharacterized protein OS=Oncorhynchus mykiss OX=8022 GN=GSONMT00025806001 PE=3 SV=1	15	5	3	1	15	5	3	9	9	9	6	5	6	6	6	9	9	9	7	6	9	8	5	6	6	4	4	6	5	7	5	4	7	6	8	7	7	8	7	6	5	6	6	5	5	4	8	7	5
tr|A0A060X2P7|A0A060X2P7_ONCMY Christmas factor OS=Oncorhynchus mykiss OX=8022 GN=GSONMT00027821001 PE=4 SV=1	12	12	12	1	12	12	12	5	4	5	5	5	4	7	6	7	4	3	4	4	4	4	1	2	2	2	4	4	6	6	6	3	3	3	10	8	8	4	3	4	5	4	4	2	3	2	3	1	5
tr|A0A060X309|A0A060X309_ONCMY Integrin beta OS=Oncorhynchus mykiss OX=8022 GN=GSONMT00029381001 PE=3 SV=1	18;3;2	18;3;2	10;0;1	3	18	18	10	12	12	12	8	8	8	7	10	9	4	2	2	5	4	5	3	2	3	4	3	3	6	9	9	9	7	8	9	8	9	8	11	11	3	4	5	4	4	5	7	7	6
tr|A0A060X339|A0A060X339_ONCMY Uncharacterized protein (Fragment) OS=Oncorhynchus mykiss OX=8022 GN=GSONMT00023391001 PE=4 SV=1	11	8	8	1	11	8	8	1	1	1	1	2	1	4	3	5	4	4	3	5	4	4	3	2	2	5	5	6	1	2	2	2	3	2	4	4	3	4	3	2	5	3	4	3	2	2	1	1	1
tr|A0A060X393|A0A060X393_ONCMY Ig-like domain-containing protein OS=Oncorhynchus mykiss OX=8022 GN=GSONMT00063094001 PE=4 SV=1	3	1	1	1	3	1	1	1	1	2	1	1	1	1	2	0	1	1	1	1	1	2	0	0	0	1	0	0	1	1	1	1	1	1	0	0	1	2	2	2	1	1	1	1	1	1	1	2	0
tr|A0A060X3U3|A0A060X3U3_ONCMY Uncharacterized protein OS=Oncorhynchus mykiss OX=8022 GN=GSONMT00016980001 PE=4 SV=1;tr|A4IEA9|A4IEA9_ONCMY Lymphocyte cytosolic protein 1 (Fragment) OS=Oncorhynchus mykiss OX=8022 GN=lcp1 PE=2 SV=1	19;16;2	2;2;0	2;2;0	3	19	2	2	1	1	0	2	1	2	4	3	1	1	4	3	1	2	3	4	6	7	11	8	11	3	3	1	6	4	7	2	2	2	7	10	9	0	1	2	0	0	0	0	0	0
tr|A0A060X4G6|A0A060X4G6_ONCMY RanBD1 domain-containing protein OS=Oncorhynchus mykiss OX=8022 GN=GSONMT00001625001 PE=4 SV=1;tr|A0A060WYX9|A0A060WYX9_ONCMY RanBD1 domain-containing protein OS=Oncorhynchus mykiss OX=8022 GN=GSONMT00017903001 PE=4 SV=1	2;2	2;2	2;2	2	2	2	2	0	0	0	0	0	0	0	0	0	0	1	1	0	0	0	0	0	0	1	1	0	1	0	0	0	1	1	0	0	0	1	0	0	0	0	0	0	0	0	0	0	0
tr|A0A060X4R5|A0A060X4R5_ONCMY C1q domain-containing protein OS=Oncorhynchus mykiss OX=8022 GN=GSONMT00002696001 PE=4 SV=1	5	5	2	1	5	5	2	1	1	1	1	1	1	1	0	1	1	1	1	1	1	1	2	3	3	2	2	1	1	1	1	1	1	1	1	1	1	1	2	1	1	1	1	1	2	2	1	1	1
tr|A0A060X642|A0A060X642_ONCMY 2-phospho-D-glycerate hydro-lyase OS=Oncorhynchus mykiss OX=8022 GN=GSONMT00032562001 PE=3 SV=1;tr|A0A060W8D2|A0A060W8D2_ONCMY 2-phospho-D-glycerate hydro-lyase OS=Oncorhynchus mykiss OX=8022 GN=GSONMT00068745001 PE=3 SV=1;tr	4;2;2;1;1;1	1;1;1;0;0;1	1;1;1;0;0;1	6	4	1	1	1	0	0	0	0	0	1	1	1	1	0	0	0	0	0	1	1	1	3	4	3	1	1	1	1	2	1	1	1	1	1	2	1	1	1	0	1	1	1	0	0	1
tr|A0A060X6N2|A0A060X6N2_ONCMY L-lactate dehydrogenase OS=Oncorhynchus mykiss OX=8022 GN=GSONMT00016404001 PE=3 SV=1	5	3	3	1	5	3	3	0	1	0	0	0	0	0	0	0	0	0	0	0	0	0	0	0	0	2	4	2	0	0	0	3	3	3	0	0	0	0	0	0	0	0	0	0	0	0	0	0	0
tr|A0A060X7H0|A0A060X7H0_ONCMY Uncharacterized protein OS=Oncorhynchus mykiss OX=8022 GN=GSONMT00008615001 PE=4 SV=1	2	2	2	1	2	2	2	0	0	0	0	0	0	0	0	0	0	0	0	0	0	0	0	0	1	0	0	0	0	0	0	0	0	0	0	0	0	0	0	0	0	0	0	0	0	0	0	0	0
tr|A0A060X7H2|A0A060X7H2_ONCMY Creatine kinase OS=Oncorhynchus mykiss OX=8022 GN=GSONMT00046281001 PE=3 SV=1	17	1	1	1	17	1	1	3	3	2	0	0	0	0	0	0	0	0	0	0	0	0	7	8	7	8	9	10	0	1	0	10	11	12	0	0	0	5	6	6	0	0	0	2	2	1	0	0	0
tr|A0A060X7U1|A0A060X7U1_ONCMY Uncharacterized protein OS=Oncorhynchus mykiss OX=8022 GN=GSONMT00055302001 PE=4 SV=1	11	11	7	1	11	11	7	1	2	2	0	0	0	2	2	3	3	2	3	1	2	1	2	3	3	2	2	1	2	2	2	1	1	2	6	5	4	2	4	1	2	2	2	2	2	2	2	2	1
tr|A0A060X840|A0A060X840_ONCMY Uncharacterized protein OS=Oncorhynchus mykiss OX=8022 GN=GSONMT00043621001 PE=3 SV=1	7	1	0	1	7	1	0	3	4	4	1	1	1	0	0	0	0	0	0	0	0	0	0	0	0	3	3	3	0	0	0	6	3	5	0	0	0	3	3	2	0	0	0	0	0	0	0	0	0
tr|A0A060X8D9|A0A060X8D9_ONCMY Olfactomedin-like domain-containing protein OS=Oncorhynchus mykiss OX=8022 GN=GSONMT00063974001 PE=4 SV=1	14	14	14	1	14	14	14	3	4	3	2	2	2	2	3	7	1	3	3	4	2	3	2	4	2	4	5	5	3	3	5	3	3	6	4	7	5	3	3	2	4	4	4	2	1	2	6	3	5
tr|A0A060X8J1|A0A060X8J1_ONCMY GST class-pi (Fragment) OS=Oncorhynchus mykiss OX=8022 GN=GSONMT00033208001 PE=3 SV=1	3	3	2	1	3	3	2	0	0	0	0	0	0	0	0	0	0	0	0	0	0	0	0	0	0	1	2	1	0	0	0	2	2	2	0	0	0	1	1	1	0	0	0	0	0	0	0	0	0
tr|A0A060X8J9|A0A060X8J9_ONCMY L-lactate dehydrogenase OS=Oncorhynchus mykiss OX=8022 GN=GSONMT00025898001 PE=3 SV=1	7	7	5	1	7	7	5	0	0	0	0	0	0	0	0	0	0	0	0	0	0	0	0	1	0	4	5	4	1	0	0	5	6	5	0	0	0	1	1	1	0	0	0	1	1	0	0	0	0
tr|A0A060X8X3|A0A060X8X3_ONCMY Uncharacterized protein OS=Oncorhynchus mykiss OX=8022 GN=GSONMT00027840001 PE=4 SV=1	56;11	5;0	5;0	2	56	5	5	19	19	19	15	16	15	20	21	21	20	22	24	21	21	23	33	36	33	25	23	25	25	23	27	25	30	28	22	22	25	28	28	27	18	19	21	24	22	19	15	14	17
tr|A0A060X952|A0A060X952_ONCMY Uncharacterized protein OS=Oncorhynchus mykiss OX=8022 GN=GSONMT00055315001 PE=4 SV=1;tr|A0A060XGS9|A0A060XGS9_ONCMY Uncharacterized protein OS=Oncorhynchus mykiss OX=8022 GN=GSONMT00058882001 PE=4 SV=1	4;2	4;2	4;2	2	4	4	4	0	0	0	0	0	0	0	0	0	0	0	0	0	1	1	0	0	0	1	0	1	0	0	0	0	1	0	0	0	0	1	1	1	0	2	1	1	0	0	0	0	0
tr|A0A060X960|A0A060X960_ONCMY SERPIN domain-containing protein OS=Oncorhynchus mykiss OX=8022 GN=GSONMT00031536001 PE=3 SV=1	16	16	16	1	16	16	16	7	8	9	6	6	7	5	6	5	7	5	4	7	9	8	4	3	6	11	12	10	2	4	4	6	5	4	5	8	5	10	10	10	7	6	6	6	7	6	1	1	4
tr|A0A060X9D3|A0A060X9D3_ONCMY SERPIN domain-containing protein OS=Oncorhynchus mykiss OX=8022 GN=GSONMT00049721001 PE=3 SV=1;tr|A0A060WQ76|A0A060WQ76_ONCMY SERPIN domain-containing protein OS=Oncorhynchus mykiss OX=8022 GN=GSONMT00060072001 PE=3 SV=1	8;4	8;4	8;4	2	8	8	8	2	3	3	1	1	2	3	4	4	1	4	2	2	3	2	2	2	3	3	5	3	5	3	4	5	4	4	4	4	3	5	6	6	4	2	4	3	3	3	2	1	1
tr|A0A060X9R9|A0A060X9R9_ONCMY Uncharacterized protein OS=Oncorhynchus mykiss OX=8022 GN=GSONMT00063999001 PE=3 SV=1	3;1	3;1	3;1	2	3	3	3	1	2	1	0	1	1	2	1	1	1	1	1	1	1	1	1	1	1	0	1	1	0	1	1	1	1	1	2	1	3	0	1	1	1	1	1	1	1	1	1	0	1
tr|A0A060XA59|A0A060XA59_ONCMY Creatine kinase OS=Oncorhynchus mykiss OX=8022 GN=GSONMT00050693001 PE=3 SV=1	18	2	2	1	18	2	2	3	4	4	0	0	0	0	0	0	0	0	0	0	0	0	7	8	8	11	11	12	1	1	0	10	12	12	0	0	0	4	4	6	0	0	0	4	3	2	0	0	0
tr|A0A060XA94|A0A060XA94_ONCMY Uncharacterized protein OS=Oncorhynchus mykiss OX=8022 GN=GSONMT00051732001 PE=4 SV=1	13	13	5	1	13	13	5	8	9	9	7	6	5	8	8	7	6	7	7	7	8	8	7	6	7	4	4	5	8	7	7	4	7	7	8	8	8	6	6	7	5	6	6	7	7	7	9	8	8
tr|A0A060XAE5|A0A060XAE5_ONCMY Complement component C9 OS=Oncorhynchus mykiss OX=8022 GN=GSONMT00063041001 PE=3 SV=1;sp|P06682|CO9_ONCMY Complement component C9 (Fragment) OS=Oncorhynchus mykiss OX=8022 GN=c9 PE=2 SV=2	32;26;4	32;26;4	3;3;0	3	32	32	3	18	18	18	15	15	17	17	18	18	18	16	17	17	17	17	22	21	22	18	18	18	18	18	17	20	20	21	17	18	18	18	19	19	17	18	18	17	17	15	13	18	16
tr|A0A060XAL9|A0A060XAL9_ONCMY Ig-like domain-containing protein OS=Oncorhynchus mykiss OX=8022 GN=GSONMT00000240001 PE=4 SV=1	3	1	1	1	3	1	1	2	2	2	2	2	2	1	0	0	0	0	1	0	0	1	0	0	0	0	0	1	1	1	1	1	0	0	1	1	1	1	1	2	2	1	2	1	1	1	2	2	2
tr|A0A060XB41|A0A060XB41_ONCMY Glyceraldehyde-3-phosphate dehydrogenase OS=Oncorhynchus mykiss OX=8022 GN=GSONMT00011170001 PE=3 SV=1;tr|A0A060Y1Q8|A0A060Y1Q8_ONCMY Glyceraldehyde-3-phosphate dehydrogenase OS=Oncorhynchus mykiss OX=8022 GN=GSONMT0001708900	8;7;6;1	8;7;6;1	8;7;6;1	4	8	8	8	1	0	0	2	1	1	1	0	0	0	0	0	1	1	1	1	2	2	6	5	5	3	2	2	2	3	3	0	1	0	4	7	5	0	0	0	1	0	0	0	0	0
tr|A0A060XB63|A0A060XB63_ONCMY Fibulin-1 OS=Oncorhynchus mykiss OX=8022 GN=GSONMT00038288001 PE=3 SV=1	5	5	5	1	5	5	5	1	1	1	0	0	1	0	0	0	0	1	1	1	1	1	0	0	0	2	1	2	0	1	0	1	2	0	1	2	1	1	0	1	2	1	1	0	0	0	0	0	0
tr|A0A060XBB9|A0A060XBB9_ONCMY Adenylate kinase isoenzyme 1 OS=Oncorhynchus mykiss OX=8022 GN=AK1 PE=3 SV=1	8	8	1	1	8	8	1	1	1	1	0	0	0	0	0	0	0	0	0	0	0	0	2	2	3	4	4	3	0	0	0	6	7	5	0	0	0	1	3	2	0	0	0	0	0	0	0	0	0
tr|A0A060XBJ0|A0A060XBJ0_ONCMY SERPIN domain-containing protein OS=Oncorhynchus mykiss OX=8022 GN=GSONMT00058278001 PE=3 SV=1	6	3	3	1	6	3	3	1	0	1	2	2	2	1	0	1	0	1	3	2	1	2	2	2	2	1	1	0	0	2	1	1	0	0	3	2	2	0	0	0	3	2	2	1	1	1	3	1	3
tr|A0A060XCE7|A0A060XCE7_ONCMY Uncharacterized protein OS=Oncorhynchus mykiss OX=8022 GN=GSONMT00063270001 PE=4 SV=1	1	1	1	1	1	1	1	0	0	0	0	0	0	1	1	0	0	0	0	0	0	0	0	0	0	0	0	0	1	1	1	1	1	1	0	1	0	0	0	1	1	0	1	0	0	0	0	0	1
tr|A0A060XCX2|A0A060XCX2_ONCMY Uncharacterized protein OS=Oncorhynchus mykiss OX=8022 GN=GSONMT00000383001 PE=3 SV=1;tr|A0A060VWN9|A0A060VWN9_ONCMY Uncharacterized protein OS=Oncorhynchus mykiss OX=8022 GN=GSONMT00079506001 PE=3 SV=1	2;1	2;1	2;1	2	2	2	2	2	2	2	1	1	1	0	2	0	0	0	0	1	1	1	0	1	1	1	2	2	2	2	2	2	2	2	1	2	1	2	2	2	1	1	1	0	1	0	1	1	1
tr|A0A060XD49|A0A060XD49_ONCMY Ig-like domain-containing protein OS=Oncorhynchus mykiss OX=8022 GN=GSONMT00017796001 PE=4 SV=1	1	1	1	1	1	1	1	0	0	0	0	0	0	0	0	0	0	0	0	0	0	0	0	0	0	0	0	0	0	0	0	1	0	1	0	0	0	0	1	0	0	0	0	0	0	0	0	0	0
tr|A0A060XD51|A0A060XD51_ONCMY Alpha-1,4 glucan phosphorylase OS=Oncorhynchus mykiss OX=8022 GN=GSONMT00020213001 PE=3 SV=1	17	9	2	1	17	9	2	2	0	2	1	1	0	0	0	0	0	0	0	0	0	0	0	1	1	6	6	4	1	2	2	6	7	7	1	0	0	4	4	5	0	0	0	0	0	0	0	0	0
tr|A0A060XD83|A0A060XD83_ONCMY RRM domain-containing protein OS=Oncorhynchus mykiss OX=8022 GN=GSONMT00022584001 PE=4 SV=1;tr|A0A060Y6S9|A0A060Y6S9_ONCMY RRM domain-containing protein OS=Oncorhynchus mykiss OX=8022 GN=GSONMT00036388001 PE=4 SV=1	1;1	1;1	1;1	2	1	1	1	0	0	0	0	0	0	0	0	0	0	0	0	0	0	0	0	0	0	0	0	0	0	0	0	0	0	0	0	0	0	0	0	0	0	0	0	0	0	0	0	0	0
tr|A0A060XDC6|A0A060XDC6_ONCMY Alpha-1,4 glucan phosphorylase OS=Oncorhynchus mykiss OX=8022 GN=GSONMT00007574001 PE=3 SV=1	17;2	4;0	4;0	2	17	4	4	3	1	4	0	0	0	0	0	0	0	0	0	1	1	0	0	1	1	10	12	11	1	2	2	14	11	13	0	0	0	5	4	6	0	0	0	0	0	0	0	0	0
tr|A0A060XDQ9|A0A060XDQ9_ONCMY Uncharacterized protein OS=Oncorhynchus mykiss OX=8022 GN=GSONMT00037545001 PE=3 SV=1	1	1	1	1	1	1	1	0	0	0	0	0	0	0	0	0	1	1	1	0	0	0	0	0	0	0	0	0	0	0	0	0	0	0	0	0	0	0	0	0	0	0	0	0	0	0	0	0	0
tr|A0A060XE72|A0A060XE72_ONCMY VWFA domain-containing protein OS=Oncorhynchus mykiss OX=8022 GN=GSONMT00003188001 PE=4 SV=1	12	11	11	1	12	11	11	8	8	7	8	7	6	8	8	8	8	7	7	8	7	7	6	7	8	5	6	7	9	7	8	6	5	7	7	8	7	5	7	7	8	8	7	7	6	5	8	7	7
tr|A0A060XEG1|A0A060XEG1_ONCMY Hemopexin OS=Oncorhynchus mykiss OX=8022 GN=GSONMT00045609001 PE=3 SV=1	26;7	26;7	26;7	2	26	26	26	19	19	19	18	18	19	19	19	19	18	19	19	18	18	19	23	24	25	19	19	19	20	19	20	17	18	18	19	19	19	18	18	17	18	19	19	18	19	18	18	18	19
tr|A0A060XET2|A0A060XET2_ONCMY Glycine N-methyltransferase OS=Oncorhynchus mykiss OX=8022 GN=GSONMT00032006001 PE=3 SV=1	2	2	2	1	2	2	2	0	0	0	0	0	0	0	0	0	0	0	0	0	0	0	0	0	0	0	0	0	0	0	0	0	0	0	0	0	0	0	0	0	2	1	1	0	0	0	0	0	1
tr|A0A060XEX6|A0A060XEX6_ONCMY Glucose-6-phosphate 1-dehydrogenase OS=Oncorhynchus mykiss OX=8022 GN=GSONMT00035681001 PE=3 SV=1;tr|A5JNM0|A5JNM0_ONCMY Glucose-6-phosphate 1-dehydrogenase (Fragment) OS=Oncorhynchus mykiss OX=8022 GN=G6PD PE=2 SV=1;tr|A0A06	6;5;4;4	6;5;4;4	6;5;4;4	4	6	6	6	0	0	0	0	0	0	0	0	0	1	0	0	0	0	0	0	1	0	4	3	1	0	0	0	3	2	2	0	0	0	1	1	2	0	0	0	0	0	0	0	0	0
tr|A0A060XF74|A0A060XF74_ONCMY Glyceraldehyde-3-phosphate dehydrogenase OS=Oncorhynchus mykiss OX=8022 GN=GSONMT00035829001 PE=3 SV=1;tr|A0A060WRC9|A0A060WRC9_ONCMY Glyceraldehyde-3-phosphate dehydrogenase OS=Oncorhynchus mykiss OX=8022 GN=GSONMT0002407400	8;8;3	6;6;1	6;6;1	3	8	6	6	4	6	4	3	3	4	1	1	2	0	0	0	2	2	0	3	3	3	2	3	2	6	5	5	5	5	6	1	1	0	5	5	5	0	1	0	2	2	1	1	0	1
tr|A0A060XFG5|A0A060XFG5_ONCMY Peptidase_M14 domain-containing protein OS=Oncorhynchus mykiss OX=8022 GN=GSONMT00048677001 PE=3 SV=1	2	2	2	1	2	2	2	0	0	0	0	0	0	0	0	1	0	0	0	0	1	0	0	0	0	0	0	0	0	0	1	0	0	0	0	1	0	0	0	0	0	0	0	0	0	0	0	0	0
tr|A0A060XFN3|A0A060XFN3_ONCMY Uncharacterized protein OS=Oncorhynchus mykiss OX=8022 GN=GSONMT00048193001 PE=4 SV=1	2	1	1	1	2	1	1	0	0	0	0	0	0	0	0	0	1	1	1	1	1	1	1	1	1	2	2	2	0	0	0	2	2	2	1	1	1	2	2	2	0	0	1	2	2	2	0	0	0
tr|A0A060XFN8|A0A060XFN8_ONCMY Uncharacterized protein OS=Oncorhynchus mykiss OX=8022 GN=GSONMT00058891001 PE=4 SV=1	9	5	5	1	9	5	5	0	0	1	0	0	0	1	1	1	1	1	2	1	4	1	2	4	3	3	2	1	1	1	1	1	1	1	1	3	1	3	3	2	1	1	1	1	1	1	1	1	0
tr|A0A060XFQ4|A0A060XFQ4_ONCMY Alpha-1,4 glucan phosphorylase OS=Oncorhynchus mykiss OX=8022 GN=GSONMT00048928001 PE=3 SV=1	16	2	2	1	16	2	2	1	0	1	1	1	0	0	0	0	0	0	0	0	0	0	0	1	1	5	5	3	1	1	2	5	6	6	1	0	0	3	3	4	0	0	0	0	0	0	0	0	0
tr|A0A060XG80|A0A060XG80_ONCMY Pyruvate kinase OS=Oncorhynchus mykiss OX=8022 GN=GSONMT00052888001 PE=3 SV=1	11;4	11;4	6;4	2	11	11	6	1	0	1	0	0	0	0	0	0	0	0	0	0	0	0	2	2	2	6	4	6	0	0	0	3	3	6	0	0	0	2	1	2	0	0	0	0	0	0	0	0	0
tr|A0A060XG86|A0A060XG86_ONCMY Peptidyl-prolyl cis-trans isomerase OS=Oncorhynchus mykiss OX=8022 GN=GSONMT00050988001 PE=3 SV=1	3	1	1	1	3	1	1	0	1	0	0	0	0	0	0	0	0	1	2	0	0	0	0	1	0	1	1	1	0	0	0	0	0	0	0	0	0	0	1	1	0	0	0	0	0	0	0	0	0
tr|A0A060XGG8|A0A060XGG8_ONCMY Peptidase S1 domain-containing protein OS=Oncorhynchus mykiss OX=8022 GN=GSONMT00047915001 PE=4 SV=1	17;4	17;4	12;4	2	17	17	12	0	0	0	2	3	3	5	4	5	8	8	8	5	7	6	10	10	12	10	10	10	5	4	5	11	11	12	6	5	5	12	11	13	6	6	6	12	9	8	1	0	1
tr|A0A060XGL3|A0A060XGL3_ONCMY Rab GDP dissociation inhibitor OS=Oncorhynchus mykiss OX=8022 GN=GSONMT00037920001 PE=3 SV=1;tr|A0A060XXW6|A0A060XXW6_ONCMY Rab GDP dissociation inhibitor OS=Oncorhynchus mykiss OX=8022 GN=GSONMT00057128001 PE=3 SV=1	2;2	2;2	2;2	2	2	2	2	0	0	0	0	0	0	0	0	0	0	1	0	0	0	0	0	0	0	0	0	0	0	0	0	0	0	0	0	0	0	0	0	0	0	0	0	0	0	0	0	0	0
tr|A0A060XH29|A0A060XH29_ONCMY Uncharacterized protein OS=Oncorhynchus mykiss OX=8022 GN=GSONMT00019074001 PE=3 SV=1	7	2	2	1	7	2	2	0	0	0	0	0	0	0	1	0	0	0	0	0	0	0	0	0	0	4	2	3	1	0	0	3	3	4	0	0	0	0	0	0	0	0	0	0	0	0	0	0	0
tr|A0A060XH97|A0A060XH97_ONCMY Uncharacterized protein OS=Oncorhynchus mykiss OX=8022 GN=GSONMT00057355001 PE=4 SV=1	2	2	2	1	2	2	2	0	1	0	0	0	0	0	1	1	1	2	2	0	0	0	0	0	0	0	0	0	1	0	1	0	0	0	0	0	0	0	0	0	0	0	0	0	0	0	0	0	0
tr|A0A060XHI9|A0A060XHI9_ONCMY Uncharacterized protein OS=Oncorhynchus mykiss OX=8022 GN=GSONMT00027096001 PE=4 SV=1	16	16	16	1	16	16	16	8	7	5	6	6	7	6	6	7	6	8	7	7	7	7	3	2	4	4	4	4	7	8	9	5	4	7	11	11	10	3	3	2	6	7	7	4	5	4	4	4	5
tr|A0A060XHN5|A0A060XHN5_ONCMY Fructose-bisphosphate aldolase OS=Oncorhynchus mykiss OX=8022 GN=GSONMT00053924001 PE=3 SV=1	15	2	2	1	15	2	2	2	3	2	2	1	2	1	1	1	0	0	0	2	0	0	4	4	6	8	9	10	2	2	3	10	9	8	0	0	1	7	6	5	0	0	0	3	4	4	0	0	0
tr|A0A060XI79|A0A060XI79_ONCMY Christmas factor OS=Oncorhynchus mykiss OX=8022 GN=GSONMT00050850001 PE=4 SV=1	3	3	3	1	3	3	3	0	0	0	0	0	0	0	0	0	0	0	0	0	0	0	0	0	0	0	0	0	1	0	1	0	0	0	1	1	0	0	0	0	0	0	0	0	0	0	0	0	0
tr|A0A060XIJ0|A0A060XIJ0_ONCMY Uncharacterized protein OS=Oncorhynchus mykiss OX=8022 GN=GSONMT00045659001 PE=3 SV=1	2	2	2	1	2	2	2	0	0	0	0	0	0	0	0	0	0	0	0	0	0	0	1	2	2	0	0	0	0	0	0	0	0	0	0	0	0	0	0	0	0	0	0	0	0	0	0	0	0
tr|A0A060XIK2|A0A060XIK2_ONCMY Ig-like domain-containing protein OS=Oncorhynchus mykiss OX=8022 GN=GSONMT00039285001 PE=4 SV=1	4	4	2	1	4	4	2	3	3	2	1	2	2	2	3	3	3	3	3	2	2	1	3	3	3	1	3	3	2	3	3	2	2	2	3	2	2	3	3	3	2	2	2	1	1	1	2	1	2
tr|A0A060XJ10|A0A060XJ10_ONCMY Ig-like domain-containing protein OS=Oncorhynchus mykiss OX=8022 GN=GSONMT00040181001 PE=4 SV=1	1	1	1	1	1	1	1	0	0	0	0	0	0	0	0	0	0	1	0	1	1	1	0	0	0	0	0	0	0	0	0	1	0	0	1	1	1	1	1	1	0	0	0	0	0	0	1	1	1
tr|A0A060XJ51|A0A060XJ51_ONCMY Glutaminyl-peptide cyclotransferase OS=Oncorhynchus mykiss OX=8022 GN=GSONMT00031749001 PE=3 SV=1	5	5	5	1	5	5	5	0	0	0	0	0	0	0	0	0	0	0	0	0	1	0	3	3	4	2	1	2	0	0	0	1	1	1	0	0	0	2	0	2	0	0	0	0	0	0	0	0	0
tr|A0A060XJ69|A0A060XJ69_ONCMY Anaphylatoxin-like domain-containing protein OS=Oncorhynchus mykiss OX=8022 GN=GSONMT00012607001 PE=4 SV=1	16;6	16;6	16;6	2	16	16	16	0	0	0	0	0	0	3	3	5	1	0	0	4	4	3	6	4	7	5	3	4	0	0	0	0	0	0	0	0	0	0	0	0	0	0	0	0	3	1	0	0	0
tr|A0A060XJE9|A0A060XJE9_ONCMY Tr-type G domain-containing protein OS=Oncorhynchus mykiss OX=8022 GN=GSONMT00049489001 PE=3 SV=1;tr|Q8QFP0|Q8QFP0_ONCMY Elongation factor 1-alpha OS=Oncorhynchus mykiss OX=8022 PE=2 SV=1;tr|A0A060WKM1|A0A060WKM1_ONCMY Elonga	6;6;6;4;4;4;4;3;2;1	6;6;6;4;4;4;4;3;2;1	6;6;6;4;4;4;4;3;2;1	10	6	6	6	0	0	0	0	1	1	0	0	0	0	0	0	0	0	0	1	0	1	0	2	1	0	1	1	0	0	0	0	0	0	1	0	1	0	0	0	1	0	0	0	0	0
tr|A0A060XKA1|A0A060XKA1_ONCMY Uncharacterized protein OS=Oncorhynchus mykiss OX=8022 GN=GSONMT00062425001 PE=4 SV=1	11	11	11	1	11	11	11	9	9	9	8	8	8	8	8	8	7	8	8	8	8	8	10	9	9	8	7	8	8	9	8	7	6	7	8	9	9	8	8	8	7	6	6	7	8	8	8	8	8
tr|A0A060XKH9|A0A060XKH9_ONCMY Cystatin domain-containing protein OS=Oncorhynchus mykiss OX=8022 GN=GSONMT00020217001 PE=3 SV=1	1	1	1	1	1	1	1	0	0	0	0	0	0	0	0	0	1	0	1	0	0	0	0	0	0	1	1	1	0	0	0	1	1	1	1	0	0	1	1	1	0	0	0	0	0	0	0	0	0
tr|A0A060XKK4|A0A060XKK4_ONCMY Uncharacterized protein OS=Oncorhynchus mykiss OX=8022 GN=GSONMT00058939001 PE=4 SV=1	6	6	6	1	6	6	6	2	1	1	1	1	1	1	1	1	1	2	2	2	4	1	3	3	2	2	2	3	1	1	1	1	2	2	1	1	1	3	3	2	1	1	2	2	2	2	1	1	1
tr|A0A060XKX2|A0A060XKX2_ONCMY GLOBIN domain-containing protein OS=Oncorhynchus mykiss OX=8022 GN=GSONMT00009495001 PE=3 SV=1	8	1	1	1	8	1	1	4	5	5	3	3	3	3	3	3	4	5	4	3	3	3	2	2	2	2	1	3	3	3	3	3	3	3	0	1	0	3	2	3	3	4	4	3	3	3	2	2	2
tr|A0A060XL19|A0A060XL19_ONCMY ULP_PROTEASE domain-containing protein OS=Oncorhynchus mykiss OX=8022 GN=GSONMT00021252001 PE=3 SV=1	1	1	1	1	1	1	1	1	0	0	0	0	0	1	1	1	1	0	0	0	0	0	0	0	0	0	0	0	0	0	0	0	0	0	0	1	1	0	1	0	0	0	0	0	0	0	0	0	0
tr|A0A060XL70|A0A060XL70_ONCMY 40S ribosomal protein S29 OS=Oncorhynchus mykiss OX=8022 GN=GSONMT00055995001 PE=3 SV=1	1	1	1	1	1	1	1	0	0	0	0	0	0	0	0	0	0	0	0	0	0	0	0	0	0	0	0	0	0	0	0	0	0	0	0	0	0	0	0	0	0	0	0	0	0	0	0	0	0
tr|A0A060XLW3|A0A060XLW3_ONCMY Uncharacterized protein OS=Oncorhynchus mykiss OX=8022 GN=GSONMT00053047001 PE=4 SV=1	20	20	3	1	20	20	3	0	0	0	2	1	2	3	2	1	0	4	3	0	1	2	4	7	8	12	9	12	2	3	1	7	5	6	1	1	2	8	10	8	0	1	2	0	0	0	0	0	0
tr|A0A060XLW7|A0A060XLW7_ONCMY NTR domain-containing protein OS=Oncorhynchus mykiss OX=8022 GN=GSONMT00047883001 PE=3 SV=1	5	5	5	1	5	5	5	0	0	0	0	0	0	2	2	1	0	0	0	3	2	2	3	0	0	0	0	1	0	0	0	0	0	0	0	0	0	0	0	0	0	0	0	0	0	0	0	0	0
tr|A0A060XLX2|A0A060XLX2_ONCMY Uncharacterized protein OS=Oncorhynchus mykiss OX=8022 GN=GSONMT00047892001 PE=4 SV=1;tr|A0A060Y2A5|A0A060Y2A5_ONCMY Uncharacterized protein OS=Oncorhynchus mykiss OX=8022 GN=GSONMT00059514001 PE=4 SV=1	6;4;1;1	6;4;1;1	5;4;0;0	4	6	6	5	0	0	0	0	0	0	0	0	0	0	0	0	0	0	0	0	0	0	0	0	0	0	0	0	1	0	0	2	0	3	0	0	1	0	0	0	0	0	0	0	0	0
tr|A0A060XMD7|A0A060XMD7_ONCMY Nucleoside diphosphate kinase OS=Oncorhynchus mykiss OX=8022 GN=GSONMT00029228001 PE=3 SV=1;tr|C1BIF8|C1BIF8_ONCMY Nucleoside diphosphate kinase B OS=Oncorhynchus mykiss OX=8022 GN=NDKB PE=2 SV=1	7;5	4;2	4;2	2	7	4	4	4	4	4	2	2	3	1	1	1	1	0	3	0	0	0	2	3	3	4	5	5	0	2	1	6	6	6	1	0	1	4	5	5	1	1	0	2	1	1	1	1	1
tr|A0A060XML9|A0A060XML9_ONCMY Uncharacterized protein OS=Oncorhynchus mykiss OX=8022 GN=GSONMT00023426001 PE=4 SV=1	1	1	1	1	1	1	1	1	1	1	1	1	1	1	1	1	1	1	1	1	1	1	0	0	0	1	1	1	0	1	1	1	1	1	0	1	1	1	1	1	1	1	1	1	1	1	1	1	1
tr|A0A060XMP9|A0A060XMP9_ONCMY Uncharacterized protein OS=Oncorhynchus mykiss OX=8022 GN=GSONMT00011807001 PE=4 SV=1	16	2	0	1	16	2	0	11	11	11	8	8	8	10	11	9	3	4	4	10	11	10	10	9	10	9	7	9	10	10	10	9	10	10	10	11	11	9	9	10	8	8	9	6	7	7	9	10	11
tr|A0A060XMR6|A0A060XMR6_ONCMY MACPF domain-containing protein OS=Oncorhynchus mykiss OX=8022 GN=GSONMT00051656001 PE=3 SV=1;tr|Q5W1L1|Q5W1L1_ONCMY Complement component C8 alpha chain OS=Oncorhynchus mykiss OX=8022 GN=C8 PE=2 SV=2	18;15	18;15	18;15	2	18	18	18	8	8	7	5	7	6	6	9	10	5	7	8	10	11	10	6	6	7	8	8	8	9	10	10	7	6	9	9	9	8	8	7	8	8	7	7	7	5	5	8	9	6
tr|A0A060XMW3|A0A060XMW3_ONCMY Lipocln_cytosolic_FA-bd_dom domain-containing protein OS=Oncorhynchus mykiss OX=8022 GN=GSONMT00057236001 PE=3 SV=1;tr|A0A060YMJ4|A0A060YMJ4_ONCMY Lipocln_cytosolic_FA-bd_dom domain-containing protein OS=Oncorhynchus mykiss O	4;2	4;2	2;0	2	4	4	2	4	4	4	2	4	4	3	2	4	3	4	3	4	4	4	3	1	2	4	4	4	4	2	4	4	4	4	3	3	4	4	4	4	2	3	2	1	2	2	2	3	2
tr|A0A060XMY8|A0A060XMY8_ONCMY Transporter OS=Oncorhynchus mykiss OX=8022 GN=GSONMT00001713001 PE=3 SV=1	2	2	2	1	2	2	2	0	0	0	0	0	0	1	0	0	0	0	0	0	0	0	0	0	0	1	0	1	0	0	0	0	0	1	0	0	0	0	0	0	0	0	0	0	0	0	0	0	0
tr|A0A060XN14|A0A060XN14_ONCMY Uncharacterized protein OS=Oncorhynchus mykiss OX=8022 GN=GSONMT00047354001 PE=4 SV=1	4	3	3	1	4	3	3	2	3	2	1	1	1	1	0	0	0	0	0	0	1	1	0	0	0	1	1	0	1	3	2	1	1	1	2	2	2	0	0	0	1	1	1	0	0	0	1	0	0
tr|A0A060XN19|A0A060XN19_ONCMY Uncharacterized protein OS=Oncorhynchus mykiss OX=8022 GN=GSONMT00000420001 PE=4 SV=1	21;9	21;9	14;7	2	21	21	14	18	16	14	7	7	6	8	10	11	8	9	8	7	11	9	9	9	9	8	12	10	9	10	9	5	7	7	9	9	9	8	7	7	8	9	9	7	7	8	7	9	9
tr|A0A060XNH5|A0A060XNH5_ONCMY Uncharacterized protein OS=Oncorhynchus mykiss OX=8022 GN=GSONMT00048924001 PE=3 SV=1	2	2	2	1	2	2	2	1	1	1	1	0	0	2	1	0	1	0	0	0	0	0	0	0	0	0	0	0	1	0	0	0	0	0	1	0	0	1	1	1	0	0	0	0	0	0	0	0	0
tr|A0A060XNI3|A0A060XNI3_ONCMY Uncharacterized protein OS=Oncorhynchus mykiss OX=8022 GN=GSONMT00027487001 PE=4 SV=1;tr|A0A060YC21|A0A060YC21_ONCMY Uncharacterized protein (Fragment) OS=Oncorhynchus mykiss OX=8022 GN=GSONMT00052667001 PE=4 SV=1;tr|C1BHL9|C	1;1;1;1;1	1;1;1;1;1	1;1;1;1;1	5	1	1	1	0	0	0	0	0	0	0	0	0	0	0	0	0	0	0	0	0	0	1	1	1	0	0	0	1	0	0	0	0	0	1	0	0	0	0	0	0	0	0	0	0	0
tr|A0A060XNN4|A0A060XNN4_ONCMY Vanin_C domain-containing protein (Fragment) OS=Oncorhynchus mykiss OX=8022 GN=GSONMT00023424001 PE=4 SV=1	6	1	1	1	6	1	1	3	3	3	2	2	2	1	1	1	1	2	1	2	2	2	2	2	4	2	2	2	1	1	2	1	1	1	2	2	2	1	1	1	2	2	2	2	1	1	1	1	1
tr|A0A060XNR6|A0A060XNR6_ONCMY Uncharacterized protein OS=Oncorhynchus mykiss OX=8022 GN=GSONMT00011806001 PE=3 SV=1	24	24	7	1	24	24	7	16	17	16	11	11	11	14	17	13	2	3	4	14	16	15	11	12	11	10	8	10	15	14	13	13	14	14	13	14	15	12	13	15	12	11	13	9	10	9	12	14	16
tr|A0A060XNS8|A0A060XNS8_ONCMY Uncharacterized protein OS=Oncorhynchus mykiss OX=8022 GN=GSONMT00031002001 PE=4 SV=1	9	9	9	1	9	9	9	3	2	2	2	1	2	3	4	3	3	1	3	5	6	4	5	6	5	4	5	5	3	4	3	1	1	2	3	5	4	4	4	6	4	5	4	5	6	4	4	3	4
tr|A0A060XPE1|A0A060XPE1_ONCMY Anaphylatoxin-like domain-containing protein OS=Oncorhynchus mykiss OX=8022 GN=GSONMT00047322001 PE=4 SV=1	79	79	47	1	79	79	47	38	37	35	31	31	32	49	49	45	46	46	42	44	43	42	36	35	34	42	44	45	44	42	44	35	40	35	43	44	45	40	41	42	42	37	36	36	33	35	36	36	36
tr|A0A060XPI6|A0A060XPI6_ONCMY Uncharacterized protein OS=Oncorhynchus mykiss OX=8022 GN=GSONMT00009383001 PE=4 SV=1	4	4	4	1	4	4	4	3	2	3	3	3	4	3	3	4	3	3	2	4	4	3	1	1	1	1	1	1	3	3	3	3	2	3	2	2	3	2	4	3	3	3	3	2	1	1	2	2	4
tr|A0A060XQE7|A0A060XQE7_ONCMY 3-hydroxyacyl-[acyl-carrier-protein] dehydratase OS=Oncorhynchus mykiss OX=8022 GN=GSONMT00062364001 PE=4 SV=1;tr|A0A060YJD5|A0A060YJD5_ONCMY Oleoyl-[acyl-carrier-protein] hydrolase OS=Oncorhynchus mykiss OX=8022 GN=GSONMT000	4;2	4;2	4;2	2	4	4	4	0	0	0	0	0	0	0	0	0	0	0	0	0	0	0	0	0	0	0	0	0	0	0	0	0	0	0	0	0	0	0	0	0	2	3	4	0	0	0	0	0	0
tr|A0A060XQH4|A0A060XQH4_ONCMY Uncharacterized protein OS=Oncorhynchus mykiss OX=8022 GN=GSONMT00049150001 PE=3 SV=1	4	4	4	1	4	4	4	0	1	0	0	0	0	0	0	0	1	1	1	0	0	0	0	0	1	1	1	1	0	0	0	0	0	0	0	0	0	0	0	0	0	0	0	0	0	0	0	0	0
tr|A0A060XQY8|A0A060XQY8_ONCMY Pyruvate kinase OS=Oncorhynchus mykiss OX=8022 GN=GSONMT00039311001 PE=3 SV=1	7	3	1	1	7	3	1	1	0	1	0	0	0	0	0	0	0	0	0	0	0	0	3	2	3	3	2	2	0	0	0	2	2	5	0	0	0	2	1	2	0	0	0	0	0	0	0	0	0
tr|A0A060XR46|A0A060XR46_ONCMY Adenylyl cyclase-associated protein OS=Oncorhynchus mykiss OX=8022 GN=GSONMT00049484001 PE=3 SV=1;tr|A0A060WD96|A0A060WD96_ONCMY Adenylyl cyclase-associated protein OS=Oncorhynchus mykiss OX=8022 GN=GSONMT00072631001 PE=3 SV=	5;4	5;4	5;4	2	5	5	5	1	1	1	0	0	0	1	1	1	2	1	1	1	1	1	1	0	1	3	3	3	1	1	1	3	3	3	1	0	1	2	2	3	1	0	0	0	0	0	0	0	1
tr|A0A060XRC5|A0A060XRC5_ONCMY Uncharacterized protein OS=Oncorhynchus mykiss OX=8022 GN=GSONMT00035093001 PE=4 SV=1	19;1;1	19;1;1	18;1;1	3	19	19	18	11	12	11	10	9	10	11	13	13	12	9	11	9	10	9	7	4	8	6	6	6	12	10	10	6	6	6	12	10	12	5	6	5	9	10	11	5	3	4	10	7	9
tr|A0A060XRF6|A0A060XRF6_ONCMY Fibulin-1 OS=Oncorhynchus mykiss OX=8022 GN=GSONMT00053648001 PE=3 SV=1	2	2	2	1	2	2	2	0	1	1	0	0	0	1	1	1	0	0	0	0	0	0	0	0	0	0	0	1	0	0	0	1	0	0	1	0	0	0	0	0	0	0	0	0	0	0	0	0	0
tr|A0A060XRV6|A0A060XRV6_ONCMY GLOBIN domain-containing protein OS=Oncorhynchus mykiss OX=8022 GN=GSONMT00052299001 PE=3 SV=1	8	1	1	1	8	1	1	4	3	4	2	2	2	2	2	4	5	4	4	2	2	3	2	2	2	2	1	2	3	2	2	3	3	3	0	1	0	2	1	2	3	2	2	2	2	2	2	2	2
tr|A0A060XSB4|A0A060XSB4_ONCMY GLOBIN domain-containing protein OS=Oncorhynchus mykiss OX=8022 GN=GSONMT00052297001 PE=3 SV=1	11	2	2	1	11	2	2	7	7	8	5	6	5	6	6	7	8	8	8	6	6	6	4	3	4	4	3	2	6	6	6	7	5	6	4	3	3	5	5	4	5	8	7	7	6	6	2	3	3
tr|A0A060XSJ5|A0A060XSJ5_ONCMY GLOBIN domain-containing protein OS=Oncorhynchus mykiss OX=8022 GN=GSONMT00009493001 PE=3 SV=1	13	6	4	1	13	6	4	9	9	9	5	6	5	8	8	7	7	8	8	8	7	8	5	4	5	5	5	4	8	7	7	7	7	6	5	5	5	7	6	5	6	7	8	7	6	6	4	4	5
tr|A0A060XSP6|A0A060XSP6_ONCMY Ig-like domain-containing protein OS=Oncorhynchus mykiss OX=8022 GN=GSONMT00010836001 PE=4 SV=1;tr|A0A060X087|A0A060X087_ONCMY Ig-like domain-containing protein OS=Oncorhynchus mykiss OX=8022 GN=GSONMT00053008001 PE=4 SV=1	2;1	2;1	2;1	2	2	2	2	1	1	0	1	1	0	0	1	0	1	1	1	0	0	0	0	0	0	1	0	1	1	0	1	1	2	1	1	1	0	1	1	1	1	2	1	0	0	0	0	0	0
tr|A0A060XSP7|A0A060XSP7_ONCMY Myosin motor domain-containing protein OS=Oncorhynchus mykiss OX=8022 GN=GSONMT00030285001 PE=3 SV=1	42;1;1;1;1;1;1;1	8;1;1;1;1;1;1;1	1;0;0;0;0;0;0;0	8	42	8	1	0	0	0	0	0	0	0	0	0	0	0	0	0	0	0	2	3	4	29	26	33	0	0	0	20	21	25	0	0	0	3	4	3	0	0	0	0	0	0	0	0	0
tr|A0A060XSW0|A0A060XSW0_ONCMY GLOBIN domain-containing protein OS=Oncorhynchus mykiss OX=8022 GN=GSONMT00052298001 PE=3 SV=1	18;8	1;0	1;0	2	18	1	1	14	14	15	10	10	10	11	12	12	14	13	14	11	11	11	6	8	8	9	10	10	10	11	10	10	11	10	10	10	10	10	9	9	12	12	13	10	10	9	6	8	8
tr|A0A060XSW8|A0A060XSW8_ONCMY Uncharacterized protein OS=Oncorhynchus mykiss OX=8022 GN=GSONMT00022557001 PE=4 SV=1	96	53	48	1	96	53	48	40	48	43	40	43	44	50	56	53	47	49	50	49	47	52	56	58	61	53	55	53	37	37	33	42	41	42	47	49	47	50	48	49	40	43	47	40	48	44	44	44	43
tr|A0A060XSZ2|A0A060XSZ2_ONCMY Tr-type G domain-containing protein OS=Oncorhynchus mykiss OX=8022 GN=GSONMT00053315001 PE=3 SV=1;tr|A0A060XSW2|A0A060XSW2_ONCMY Tr-type G domain-containing protein OS=Oncorhynchus mykiss OX=8022 GN=GSONMT00053745001 PE=3 SV=	5;4;3;3;1	5;4;3;3;1	5;4;3;3;1	5	5	5	5	1	0	1	0	0	0	1	1	0	1	0	0	0	0	0	0	0	0	1	1	1	1	0	0	1	0	1	0	0	0	1	0	0	0	0	0	0	0	0	0	0	0
tr|A0A060XT52|A0A060XT52_ONCMY Uncharacterized protein OS=Oncorhynchus mykiss OX=8022 GN=GSONMT00050634001 PE=3 SV=1	3	1	1	1	3	1	1	0	0	0	0	0	0	0	0	0	0	0	0	0	0	0	0	0	0	2	2	0	0	0	0	0	2	2	0	0	0	0	0	0	0	0	0	0	0	0	0	0	0
tr|A0A060XTA3|A0A060XTA3_ONCMY Myosin motor domain-containing protein OS=Oncorhynchus mykiss OX=8022 GN=GSONMT00030287001 PE=3 SV=1	40;11;7;7;5	2;1;1;1;1	0;0;0;0;0	5	40	2	0	0	0	0	0	0	0	0	0	0	0	0	0	0	0	0	1	1	2	27	24	32	0	0	0	21	21	25	0	0	0	2	3	2	0	0	0	0	0	0	0	0	0
tr|A0A060XTF5|A0A060XTF5_ONCMY Uncharacterized protein OS=Oncorhynchus mykiss OX=8022 GN=GSONMT00051192001 PE=3 SV=1	9	9	9	1	9	9	9	1	1	1	3	1	2	4	3	3	4	3	3	3	4	3	5	4	6	4	3	3	4	3	4	4	4	4	4	3	4	4	4	4	4	3	3	4	4	4	4	4	4
tr|A0A060XTK2|A0A060XTK2_ONCMY Ubiquitinyl hydrolase 1 OS=Oncorhynchus mykiss OX=8022 GN=GSONMT00002266001 PE=4 SV=1;tr|A0A060VZJ2|A0A060VZJ2_ONCMY Ubiquitin carboxyl-terminal hydrolase OS=Oncorhynchus mykiss OX=8022 GN=GSONMT00077690001 PE=3 SV=1	1;1	1;1	1;1	2	1	1	1	0	0	0	0	0	0	0	0	0	0	0	0	0	0	0	0	0	0	0	0	0	0	0	0	0	0	0	0	0	0	0	0	0	0	0	0	0	0	0	0	0	0
tr|A0A060XUK2|A0A060XUK2_ONCMY Fibrinogen C-terminal domain-containing protein OS=Oncorhynchus mykiss OX=8022 GN=GSONMT00058994001 PE=4 SV=1	32;1	32;1	20;0	2	32	32	20	11	8	11	19	20	20	0	0	0	0	0	0	8	8	11	10	11	8	22	22	22	4	4	4	11	12	12	3	3	5	26	24	22	4	2	3	5	6	4	3	1	2
tr|A0A060XUK5|A0A060XUK5_ONCMY Uncharacterized protein OS=Oncorhynchus mykiss OX=8022 GN=GSONMT00025518001 PE=4 SV=1	4	2	2	1	4	2	2	0	0	0	0	0	0	0	0	0	1	1	1	1	1	1	1	1	1	1	2	2	0	0	0	1	1	1	1	1	1	2	3	2	0	0	1	1	1	1	0	0	0
tr|A0A060XUR3|A0A060XUR3_ONCMY Uncharacterized protein OS=Oncorhynchus mykiss OX=8022 GN=GSONMT00011808001 PE=4 SV=1	7	4	4	1	7	4	4	5	6	5	4	4	4	5	5	5	0	0	1	4	5	5	2	2	2	4	3	2	6	5	4	5	5	5	4	3	4	4	4	4	5	4	5	3	4	3	4	4	5
tr|A0A060XUW4|A0A060XUW4_ONCMY Uncharacterized protein OS=Oncorhynchus mykiss OX=8022 GN=GSONMT00054695001 PE=4 SV=1	10	1	1	1	10	1	1	4	3	5	5	4	3	5	8	5	3	7	5	5	4	6	1	3	2	7	7	6	6	6	7	6	5	5	6	6	7	7	8	6	5	4	5	5	3	5	3	3	2
tr|A0A060XVD0|A0A060XVD0_ONCMY Uncharacterized protein OS=Oncorhynchus mykiss OX=8022 GN=GSONMT00011826001 PE=4 SV=1	2	2	2	1	2	2	2	0	0	0	0	0	0	0	0	0	1	1	1	0	0	0	0	0	0	0	0	0	0	0	0	0	0	0	0	0	0	0	0	0	0	0	0	0	0	0	0	0	0
tr|A0A060XVE8|A0A060XVE8_ONCMY Uncharacterized protein OS=Oncorhynchus mykiss OX=8022 GN=GSONMT00054360001 PE=4 SV=1	1	1	1	1	1	1	1	0	0	1	0	0	0	0	0	0	0	0	0	0	0	0	0	0	0	0	0	0	0	0	1	0	0	0	0	1	0	0	0	0	0	0	1	0	0	0	0	0	0
tr|A0A060XVF4|A0A060XVF4_ONCMY Uncharacterized protein OS=Oncorhynchus mykiss OX=8022 GN=GSONMT00020946001 PE=4 SV=1	82	82	7	1	82	82	7	29	28	31	22	22	25	33	38	32	32	30	30	37	40	40	33	37	35	29	29	26	29	28	26	31	34	32	24	30	24	41	43	47	27	28	28	36	40	36	38	35	36
tr|A0A060XVT4|A0A060XVT4_ONCMY Thioredoxin domain-containing protein OS=Oncorhynchus mykiss OX=8022 GN=GSONMT00025153001 PE=3 SV=1	1	1	1	1	1	1	1	0	0	0	0	0	0	0	0	0	0	0	0	0	0	0	0	0	0	0	0	0	0	0	0	1	0	1	0	0	0	0	0	0	0	0	0	0	0	0	0	0	0
tr|A0A060XW02|A0A060XW02_ONCMY MG1 domain-containing protein OS=Oncorhynchus mykiss OX=8022 GN=GSONMT00031001001 PE=4 SV=1	3	3	3	1	3	3	3	1	2	2	0	0	0	0	1	1	1	1	1	1	2	1	0	0	0	2	1	2	1	0	1	0	0	0	1	1	1	1	1	1	1	0	1	0	0	1	0	0	0
tr|A0A060XWJ1|A0A060XWJ1_ONCMY Uncharacterized protein OS=Oncorhynchus mykiss OX=8022 GN=GSONMT00038594001 PE=3 SV=1;tr|A0A060XT72|A0A060XT72_ONCMY Uncharacterized protein OS=Oncorhynchus mykiss OX=8022 GN=GSONMT00050453001 PE=3 SV=1;tr|A0A060WPF7|A0A060WP	14;14;14;14;14;13;12;12;9;9;5;3;2	6;6;6;6;6;5;5;5;2;5;3;2;2	2;2;2;2;2;1;2;2;0;1;1;1;1	13	14	6	2	4	6	4	5	6	5	6	5	5	6	6	8	4	5	4	5	5	7	11	12	12	5	4	4	8	8	8	4	3	3	9	11	11	2	3	2	2	1	2	1	3	4
tr|A0A060XWP2|A0A060XWP2_ONCMY SERPIN domain-containing protein OS=Oncorhynchus mykiss OX=8022 GN=GSONMT00012667001 PE=3 SV=1	9	9	9	1	9	9	9	2	3	3	6	5	5	4	4	4	3	5	6	5	6	6	2	3	4	4	3	5	2	3	2	5	6	5	6	4	6	4	3	4	5	4	5	3	5	3	5	7	4
tr|A0A060XWS6|A0A060XWS6_ONCMY Uncharacterized protein OS=Oncorhynchus mykiss OX=8022 GN=GSONMT00007929001 PE=4 SV=1	12	2	2	1	12	2	2	10	10	10	7	7	7	9	10	8	2	3	3	9	10	10	7	7	6	7	6	7	9	9	8	7	9	10	9	9	10	9	9	10	7	7	8	5	7	7	9	9	10
tr|A0A060XWS9|A0A060XWS9_ONCMY SERPIN domain-containing protein OS=Oncorhynchus mykiss OX=8022 GN=GSONMT00021388001 PE=3 SV=1	7	7	7	1	7	7	7	2	2	1	2	2	2	5	5	5	5	5	4	2	3	2	0	0	0	2	1	1	3	3	3	3	1	2	2	2	2	1	2	2	0	0	0	0	0	0	2	2	3
tr|A0A060XWU9|A0A060XWU9_ONCMY Glutaredoxin domain-containing protein OS=Oncorhynchus mykiss OX=8022 GN=GSONMT00025315001 PE=3 SV=1;tr|A0A060WD34|A0A060WD34_ONCMY Glutaredoxin domain-containing protein OS=Oncorhynchus mykiss OX=8022 GN=GSONMT00072251001 PE	1;1	1;1	1;1	2	1	1	1	0	0	0	0	0	0	0	0	0	0	0	0	0	0	0	0	0	1	1	0	1	0	0	0	1	0	1	0	0	0	0	0	0	0	0	0	0	0	0	0	0	0
tr|A0A060XWZ8|A0A060XWZ8_ONCMY Uncharacterized protein OS=Oncorhynchus mykiss OX=8022 GN=GSONMT00050264001 PE=4 SV=1	19	19	19	1	19	19	19	8	9	10	8	8	8	11	10	12	10	9	7	9	9	9	2	4	5	9	8	9	9	9	8	5	6	9	13	15	14	9	11	9	10	9	8	8	6	6	8	9	8
tr|A0A060XXG0|A0A060XXG0_ONCMY Uncharacterized protein OS=Oncorhynchus mykiss OX=8022 GN=GSONMT00007930001 PE=3 SV=1;tr|A0A0S2MT00|A0A0S2MT00_ONCMY Apolipoprotein C Ia OS=Oncorhynchus mykiss OX=8022 GN=APOC-Ia PE=2 SV=1	9;9	9;9	7;7	2	9	9	7	4	4	4	4	4	4	4	4	4	3	4	4	4	4	4	8	8	8	5	4	4	3	4	4	4	4	3	3	3	3	4	4	4	4	4	4	4	3	4	4	4	4
tr|A0A060XY48|A0A060XY48_ONCMY Uncharacterized protein OS=Oncorhynchus mykiss OX=8022 GN=GSONMT00050263001 PE=4 SV=1	1	1	1	1	1	1	1	0	0	0	0	0	0	0	0	0	0	0	0	0	0	0	0	0	0	0	0	0	0	0	0	0	0	0	1	0	0	0	0	0	0	0	0	0	0	0	0	0	0
tr|A0A060XY50|A0A060XY50_ONCMY FTP domain-containing protein OS=Oncorhynchus mykiss OX=8022 GN=GSONMT00043099001 PE=3 SV=1	3;1;1	3;1;1	3;1;1	3	3	3	3	0	0	0	2	2	2	1	1	1	1	1	1	0	0	0	0	0	0	0	1	0	1	1	1	0	0	0	1	1	2	0	0	0	1	1	1	1	1	0	0	0	1
tr|A0A060XY58|A0A060XY58_ONCMY Uncharacterized protein OS=Oncorhynchus mykiss OX=8022 GN=GSONMT00017511001 PE=4 SV=1;tr|A0A060VWT8|A0A060VWT8_ONCMY Uncharacterized protein OS=Oncorhynchus mykiss OX=8022 GN=GSONMT00079987001 PE=4 SV=1;tr|A0A060WLL6|A0A060WL	3;3;2	3;3;2	3;3;2	3	3	3	3	0	0	0	1	1	0	0	0	0	0	0	0	0	0	0	0	0	0	1	1	0	0	0	0	1	0	1	0	0	0	1	0	1	0	0	0	0	0	0	0	0	0
tr|A0A060XYC9|A0A060XYC9_ONCMY CUB domain-containing protein OS=Oncorhynchus mykiss OX=8022 GN=GSONMT00019014001 PE=4 SV=1	2	1	1	1	2	1	1	0	0	0	1	0	0	2	1	1	2	1	1	1	1	1	1	1	1	1	1	0	2	2	1	1	1	2	2	1	1	1	1	1	1	1	2	1	1	1	1	1	1
tr|A0A060XYF3|A0A060XYF3_ONCMY Ig-like domain-containing protein OS=Oncorhynchus mykiss OX=8022 GN=GSONMT00049516001 PE=4 SV=1	8	8	5	1	8	8	5	3	3	3	6	5	4	7	5	6	6	4	6	2	3	3	3	3	3	5	5	6	6	7	7	5	4	5	6	5	5	6	7	6	4	1	4	5	5	6	4	4	4
tr|A0A060XYX6|A0A060XYX6_ONCMY Ig-like domain-containing protein OS=Oncorhynchus mykiss OX=8022 GN=GSONMT00031818001 PE=4 SV=1	3	2	2	1	3	2	2	2	3	3	1	1	0	1	2	1	1	3	3	1	1	0	0	0	0	1	1	1	1	1	1	1	1	1	1	1	1	1	1	1	0	1	1	1	2	1	1	0	1
tr|A0A060XYY2|A0A060XYY2_ONCMY Ig-like domain-containing protein OS=Oncorhynchus mykiss OX=8022 GN=GSONMT00031826001 PE=4 SV=1	2	1	1	1	2	1	1	1	1	1	0	0	0	0	0	0	1	1	1	0	0	0	0	0	0	0	0	0	1	1	2	1	1	1	0	0	0	1	1	0	0	0	0	0	0	0	0	0	0
tr|A0A060XZ25|A0A060XZ25_ONCMY GLOBIN domain-containing protein OS=Oncorhynchus mykiss OX=8022 GN=GSONMT00052301001 PE=3 SV=1;tr|Q6TAD0|Q6TAD0_ONCMY Beta-globin (Fragment) OS=Oncorhynchus mykiss OX=8022 PE=2 SV=1	18;9	8;3	1;0	2	18	8	1	12	12	11	8	8	8	8	10	10	10	10	11	10	10	11	5	5	6	6	6	6	10	8	8	9	9	8	6	6	6	8	9	8	9	8	8	8	8	8	5	4	6
tr|A0A060XZ62|A0A060XZ62_ONCMY Uncharacterized protein OS=Oncorhynchus mykiss OX=8022 GN=GSONMT00001814001 PE=4 SV=1;tr|A0A060WL34|A0A060WL34_ONCMY Actin-related protein 2 OS=Oncorhynchus mykiss OX=8022 GN=GSONMT00072937001 PE=3 SV=1;tr|A0A060W7J5|A0A060W7	1;1;1	1;1;1	1;1;1	3	1	1	1	0	0	0	0	0	0	0	0	0	0	0	0	0	0	0	0	0	0	1	0	1	0	0	0	0	0	0	0	0	0	0	0	0	0	0	0	0	0	0	0	0	0
tr|A0A060XZG9|A0A060XZG9_ONCMY Transgelin OS=Oncorhynchus mykiss OX=8022 GN=GSONMT00015275001 PE=3 SV=1;tr|A0A060XKP5|A0A060XKP5_ONCMY Transgelin OS=Oncorhynchus mykiss OX=8022 GN=GSONMT00043936001 PE=3 SV=1	1;1	1;1	1;1	2	1	1	1	0	0	0	0	0	0	0	0	0	0	0	0	0	0	0	0	0	0	0	1	0	0	0	0	0	0	0	0	0	0	0	0	0	0	0	0	0	0	0	0	0	0
tr|A0A060XZH2|A0A060XZH2_ONCMY Fibrinogen C-terminal domain-containing protein OS=Oncorhynchus mykiss OX=8022 GN=GSONMT00014403001 PE=4 SV=1	19	7	7	1	19	7	7	3	1	3	5	6	6	0	0	0	0	0	0	3	3	4	4	4	3	10	11	12	1	1	1	3	3	3	1	1	2	14	12	7	0	0	0	0	0	1	0	0	0
tr|A0A060Y0L9|A0A060Y0L9_ONCMY Glutathione peroxidase OS=Oncorhynchus mykiss OX=8022 GN=GSONMT00051847001 PE=3 SV=1	5	5	5	1	5	5	5	0	1	0	0	0	0	1	1	1	1	1	1	1	1	1	2	1	1	2	3	2	1	1	1	1	1	1	1	1	0	2	2	2	1	1	0	1	0	0	0	0	1
tr|A0A060Y0R7|A0A060Y0R7_ONCMY Plastocyanin-like domain-containing protein OS=Oncorhynchus mykiss OX=8022 GN=GSONMT00051190001 PE=4 SV=1	6	6	6	1	6	6	6	3	3	3	3	3	3	3	3	3	3	3	4	3	3	3	3	3	4	4	4	4	3	3	4	3	3	3	3	3	3	3	3	4	4	2	2	4	4	4	2	2	3
tr|A0A060Y1K2|A0A060Y1K2_ONCMY Uncharacterized protein OS=Oncorhynchus mykiss OX=8022 GN=GSONMT00011511001 PE=4 SV=1	8	3	2	1	8	3	2	4	4	3	5	5	6	6	4	5	5	6	6	6	6	7	3	4	4	6	5	6	5	6	5	4	4	4	6	6	5	4	5	5	6	6	6	5	7	5	6	4	5
tr|A0A060Y244|A0A060Y244_ONCMY Uncharacterized protein OS=Oncorhynchus mykiss OX=8022 GN=GSONMT00038203001 PE=4 SV=1	10	2	2	1	10	2	2	9	8	8	6	5	6	6	7	6	6	6	6	7	7	7	4	3	4	6	5	6	8	7	7	6	7	7	7	8	7	7	6	6	6	5	6	6	7	7	6	8	7
tr|A0A060Y2D3|A0A060Y2D3_ONCMY Uncharacterized protein OS=Oncorhynchus mykiss OX=8022 GN=GSONMT00057219001 PE=4 SV=1	4	4	4	1	4	4	4	3	4	4	3	3	3	3	3	3	0	3	2	2	2	3	1	2	2	1	1	1	3	3	3	2	3	2	3	3	3	2	2	3	1	2	3	0	1	1	2	2	2
tr|A0A060Y2D6|A0A060Y2D6_ONCMY F5/8 type C domain-containing protein OS=Oncorhynchus mykiss OX=8022 GN=GSONMT00036813001 PE=3 SV=1	8	8	6	1	8	8	6	1	2	2	2	4	3	4	4	4	2	3	2	4	2	4	4	5	5	1	2	2	3	4	5	2	1	1	4	4	4	3	3	3	1	2	3	2	0	1	2	1	2
tr|A0A060Y2H6|A0A060Y2H6_ONCMY GST N-terminal domain-containing protein OS=Oncorhynchus mykiss OX=8022 GN=GSONMT00064010001 PE=4 SV=1	5	5	5	1	5	5	5	1	0	0	0	0	0	0	1	0	2	3	2	0	0	0	0	0	0	0	0	0	0	0	0	0	0	0	0	0	0	0	0	0	0	0	0	0	0	0	0	0	0
tr|A0A060Y308|A0A060Y308_ONCMY Myocilin OS=Oncorhynchus mykiss OX=8022 GN=GSONMT00025155001 PE=4 SV=1	1	1	1	1	1	1	1	1	1	1	0	0	0	1	1	1	0	0	1	1	0	0	0	0	0	0	0	0	0	0	0	0	0	0	1	1	1	0	0	1	1	0	0	0	0	0	0	0	0
tr|A0A060Y3N1|A0A060Y3N1_ONCMY Alpha-1,4 glucan phosphorylase OS=Oncorhynchus mykiss OX=8022 GN=GSONMT00012775001 PE=3 SV=1	21;1;1	21;1;1	5;0;0	3	21	21	5	3	1	5	1	1	0	0	0	0	0	0	0	1	1	0	1	2	1	12	14	13	2	3	3	14	14	15	1	0	0	8	7	7	0	0	0	0	0	0	0	0	0
tr|A0A060Y3N4|A0A060Y3N4_ONCMY Phosphoglycerate mutase OS=Oncorhynchus mykiss OX=8022 GN=GSONMT00054306001 PE=3 SV=1;tr|A0A060XVB1|A0A060XVB1_ONCMY Phosphoglycerate mutase OS=Oncorhynchus mykiss OX=8022 GN=GSONMT00016520001 PE=3 SV=1	4;3	2;1	2;1	2	4	2	2	1	0	1	0	0	0	0	0	0	0	0	0	0	0	0	0	0	0	1	2	2	1	1	0	2	1	1	0	0	0	2	1	1	0	0	0	0	0	1	0	0	0
tr|A0A060Y3R1|A0A060Y3R1_ONCMY Actin-depolymerizing factor OS=Oncorhynchus mykiss OX=8022 GN=GSONMT00017816001 PE=3 SV=1	10	3	3	1	10	3	3	0	0	0	1	1	1	0	0	1	0	0	0	1	1	1	1	2	1	8	6	6	1	0	1	2	5	3	0	0	0	3	7	5	0	0	0	0	0	0	0	0	0
tr|A0A060Y450|A0A060Y450_ONCMY Uncharacterized protein (Fragment) OS=Oncorhynchus mykiss OX=8022 GN=GSONMT00029656001 PE=4 SV=1	2	2	2	1	2	2	2	0	0	0	0	0	0	0	0	0	0	0	0	0	0	0	0	0	0	0	1	0	0	0	0	0	0	0	0	0	0	1	1	0	0	0	0	0	0	0	0	0	0
tr|A0A060Y462|A0A060Y462_ONCMY Ig-like domain-containing protein OS=Oncorhynchus mykiss OX=8022 GN=GSONMT00024951001 PE=4 SV=1	5;1	5;1	4;0	2	5	5	4	2	2	1	4	5	5	1	1	1	1	1	1	2	3	2	0	0	0	5	5	5	0	1	1	0	1	1	4	3	4	1	1	0	3	2	2	0	0	0	1	2	1
tr|A0A060Y473|A0A060Y473_ONCMY Peptidase S1 domain-containing protein OS=Oncorhynchus mykiss OX=8022 GN=GSONMT00050265001 PE=4 SV=1	2	2	2	1	2	2	2	1	0	1	0	1	1	1	2	1	1	0	1	0	1	0	0	0	0	0	0	0	0	1	0	0	0	1	1	2	2	0	0	0	2	2	2	0	0	0	0	0	1
tr|A0A060Y4C1|A0A060Y4C1_ONCMY Uncharacterized protein OS=Oncorhynchus mykiss OX=8022 GN=GSONMT00019455001 PE=3 SV=1	10	10	3	1	10	10	3	2	2	3	0	1	0	3	2	1	2	1	2	1	2	1	0	0	0	1	1	1	2	2	3	0	0	0	4	4	5	1	1	2	2	1	4	0	0	0	0	0	0
tr|A0A060Y4F1|A0A060Y4F1_ONCMY Uncharacterized protein OS=Oncorhynchus mykiss OX=8022 GN=GSONMT00019018001 PE=4 SV=1	11	11	11	1	11	11	11	5	2	4	0	0	0	7	5	8	5	5	4	6	5	5	2	4	5	2	3	3	2	2	2	0	0	0	2	2	2	1	2	2	1	1	0	0	0	0	0	1	1
tr|A0A060Y4I4|A0A060Y4I4_ONCMY Uncharacterized protein (Fragment) OS=Oncorhynchus mykiss OX=8022 GN=GSONMT00015050001 PE=4 SV=1	45	9	7	1	45	9	7	16	15	19	17	17	17	18	18	17	18	20	19	17	20	20	7	8	10	23	24	25	18	18	18	16	19	18	21	21	21	17	18	19	26	27	27	18	18	16	13	15	15
tr|A0A060Y4Y7|A0A060Y4Y7_ONCMY Uncharacterized protein OS=Oncorhynchus mykiss OX=8022 GN=GSONMT00031642001 PE=4 SV=1;tr|Q1HG86|Q1HG86_ONCMY Gonadal-soma derived growth factor OS=Oncorhynchus mykiss OX=8022 PE=2 SV=1	3;3	3;3	3;3	2	3	3	3	1	0	1	0	0	2	1	1	1	0	2	2	1	1	0	0	0	0	0	0	0	1	0	1	1	1	0	0	1	2	1	0	1	1	1	2	0	1	0	0	0	0
tr|A0A060Y547|A0A060Y547_ONCMY Uncharacterized protein OS=Oncorhynchus mykiss OX=8022 GN=GSONMT00018926001 PE=4 SV=1;tr|Q91201|Q91201_ONCMY HMG-T2 protein OS=Oncorhynchus mykiss OX=8022 GN=HMG-T2 PE=4 SV=1	3;3	3;3	3;3	2	3	3	3	0	0	0	0	0	0	0	0	0	0	1	0	0	0	0	0	0	0	0	0	0	0	0	0	0	0	0	0	0	0	0	0	0	0	0	0	0	0	0	0	0	0
tr|A0A060Y552|A0A060Y552_ONCMY Vitellogenin domain-containing protein OS=Oncorhynchus mykiss OX=8022 GN=GSONMT00051902001 PE=4 SV=1	4	4	4	1	4	4	4	2	2	2	0	0	0	0	0	0	0	2	2	2	1	2	1	0	1	0	1	2	0	0	1	2	2	2	1	1	1	1	1	1	1	1	1	0	0	0	0	0	1
tr|A0A060Y572|A0A060Y572_ONCMY Glucose-6-phosphate isomerase OS=Oncorhynchus mykiss OX=8022 GN=GSONMT00034115001 PE=3 SV=1;tr|A0A060XRV8|A0A060XRV8_ONCMY Uncharacterized protein OS=Oncorhynchus mykiss OX=8022 GN=GSONMT00011613001 PE=4 SV=1	11;7;4;1;1	11;7;4;1;1	10;7;3;1;1	5	11	11	10	0	0	0	0	0	0	1	0	0	0	0	0	0	0	0	2	2	4	5	4	5	0	0	0	5	9	7	1	0	0	3	2	3	0	0	0	0	0	0	0	0	0
tr|A0A060Y577|A0A060Y577_ONCMY 40S ribosomal protein S2 OS=Oncorhynchus mykiss OX=8022 GN=GSONMT00007231001 PE=3 SV=1	2	2	2	1	2	2	2	0	0	0	0	0	0	0	0	0	0	0	0	0	0	0	0	0	0	0	0	0	0	0	0	0	0	0	0	0	0	0	0	0	0	0	0	0	0	0	0	0	0
tr|A0A060Y5L0|A0A060Y5L0_ONCMY Ig-like domain-containing protein OS=Oncorhynchus mykiss OX=8022 GN=GSONMT00031822001 PE=4 SV=1	3	2	1	1	3	2	1	3	2	2	2	2	2	2	2	3	2	2	2	2	1	1	0	0	0	1	2	1	1	2	1	0	1	1	1	2	2	2	2	1	1	0	1	0	0	0	1	1	1
tr|A0A060Y5T9|A0A060Y5T9_ONCMY Uncharacterized protein OS=Oncorhynchus mykiss OX=8022 GN=GSONMT00022832001 PE=4 SV=1	19	19	19	1	19	19	19	15	15	14	12	12	13	15	14	14	13	13	12	12	11	14	12	11	13	13	14	13	14	14	13	13	14	12	15	15	13	15	14	14	13	13	12	13	13	10	13	15	12
tr|A0A060Y5W1|A0A060Y5W1_ONCMY Uncharacterized protein OS=Oncorhynchus mykiss OX=8022 GN=GSONMT00007433001 PE=3 SV=1	39;14;10;7;7;5;5;3;3;3;2;1;1	2;1;1;1;0;0;0;0;0;0;0;1;1	1;0;0;0;0;0;0;0;0;0;0;0;1	13	39	2	1	0	0	0	0	0	0	0	1	0	0	0	0	0	0	0	3	3	4	27	25	31	0	0	0	21	21	25	0	0	0	3	4	4	0	0	0	0	0	0	0	0	0
tr|A0A060Y5Z9|A0A060Y5Z9_ONCMY SMB domain-containing protein OS=Oncorhynchus mykiss OX=8022 GN=GSONMT00020964001 PE=4 SV=1	7	7	7	1	7	7	7	2	2	3	3	1	1	3	3	3	5	5	5	4	4	4	2	2	1	4	2	2	3	4	4	1	1	2	3	3	3	3	2	3	2	4	3	1	2	2	3	2	2
tr|A0A060Y683|A0A060Y683_ONCMY A2M_recep domain-containing protein (Fragment) OS=Oncorhynchus mykiss OX=8022 GN=GSONMT00038222001 PE=4 SV=1	17	17	10	1	17	17	10	6	5	6	5	5	5	7	8	7	5	6	6	6	5	5	8	7	6	9	9	8	9	6	6	8	6	7	7	7	6	7	5	8	10	9	8	5	5	4	4	4	4
tr|A0A060Y6M1|A0A060Y6M1_ONCMY CYTOSOL_AP domain-containing protein OS=Oncorhynchus mykiss OX=8022 GN=GSONMT00011562001 PE=3 SV=1;tr|A0A060W6Q6|A0A060W6Q6_ONCMY CYTOSOL_AP domain-containing protein OS=Oncorhynchus mykiss OX=8022 GN=GSONMT00067709001 PE=3 S	4;2	4;2	4;2	2	4	4	4	0	0	0	0	0	0	0	1	1	1	1	1	0	0	0	1	1	1	1	1	1	0	0	1	1	1	2	0	0	1	2	2	2	0	0	0	0	0	0	0	0	1
tr|A0A060Y6W1|A0A060Y6W1_ONCMY Glycerol-3-phosphate dehydrogenase [NAD(+)] OS=Oncorhynchus mykiss OX=8022 GN=GSONMT00039917001 PE=3 SV=1	4;1	4;1	4;1	2	4	4	4	0	0	0	0	0	0	0	0	0	0	0	0	0	0	0	0	0	0	1	3	2	0	0	0	3	3	2	0	0	0	0	0	0	0	0	0	0	0	0	0	0	0
tr|A0A060Y6Z0|A0A060Y6Z0_ONCMY Fibronectin type-III domain-containing protein OS=Oncorhynchus mykiss OX=8022 GN=GSONMT00005881001 PE=3 SV=1	2	2	2	1	2	2	2	1	1	1	1	1	0	0	0	0	0	0	1	1	1	1	0	0	0	0	0	1	1	1	2	0	1	1	1	1	0	1	0	0	1	0	1	0	1	0	1	1	1
tr|A0A060Y757|A0A060Y757_ONCMY GLOBIN domain-containing protein OS=Oncorhynchus mykiss OX=8022 GN=GSONMT00016593001 PE=3 SV=1	9	3	2	1	9	3	2	3	5	5	3	4	4	3	3	4	6	5	4	4	3	3	2	3	2	2	1	3	4	4	4	3	3	3	0	1	0	3	2	3	3	3	3	3	3	3	2	2	2
tr|A0A060Y7H2|A0A060Y7H2_ONCMY Uncharacterized protein OS=Oncorhynchus mykiss OX=8022 GN=GSONMT00009584001 PE=3 SV=1	22	22	17	1	22	22	17	10	9	10	7	5	7	8	11	10	0	0	0	7	6	8	17	19	18	6	7	7	9	9	7	8	8	12	10	9	10	8	9	11	5	7	7	11	12	11	7	9	7
tr|A0A060Y7K1|A0A060Y7K1_ONCMY Tubulin beta chain OS=Oncorhynchus mykiss OX=8022 GN=GSONMT00026026001 PE=3 SV=1	10	10	7	1	10	10	7	2	2	2	1	1	1	0	2	0	3	5	4	1	1	1	0	0	0	1	1	0	0	1	0	1	1	1	0	0	0	0	1	1	1	0	0	0	0	0	0	0	1
tr|A0A060Y868|A0A060Y868_ONCMY Ig-like domain-containing protein OS=Oncorhynchus mykiss OX=8022 GN=GSONMT00032907001 PE=4 SV=1	2	2	2	1	2	2	2	2	2	2	2	1	1	1	1	1	2	2	2	2	1	2	1	1	1	1	1	1	2	2	2	0	2	1	1	2	1	2	2	2	2	2	2	1	0	0	0	0	1
tr|A0A060Y887|A0A060Y887_ONCMY Uncharacterized protein OS=Oncorhynchus mykiss OX=8022 GN=GSONMT00056362001 PE=3 SV=1;tr|A0A060XYL7|A0A060XYL7_ONCMY Uncharacterized protein OS=Oncorhynchus mykiss OX=8022 GN=GSONMT00056342001 PE=3 SV=1;tr|A0A060W6N9|A0A060W6	1;1;1;1	1;1;1;1	1;1;1;1	4	1	1	1	0	0	0	0	0	0	0	0	0	0	0	0	0	0	0	0	0	0	0	0	0	0	0	0	0	0	0	0	0	0	0	0	0	0	0	0	0	0	0	0	0	0
tr|A0A060Y8H0|A0A060Y8H0_ONCMY Fructose-bisphosphatase OS=Oncorhynchus mykiss OX=8022 GN=GSONMT00015701001 PE=3 SV=1;tr|A0A060XAF0|A0A060XAF0_ONCMY Fructose-bisphosphatase OS=Oncorhynchus mykiss OX=8022 GN=GSONMT00063051001 PE=3 SV=1	2;1	2;1	2;1	2	2	2	2	0	0	0	0	0	0	0	0	0	0	0	0	0	0	0	0	0	0	1	1	1	0	0	0	2	1	1	0	0	0	1	1	2	0	0	0	0	0	0	0	0	0
tr|A0A060Y8H2|A0A060Y8H2_ONCMY Uncharacterized protein OS=Oncorhynchus mykiss OX=8022 GN=GSONMT00048755001 PE=3 SV=1;tr|A0A060X3E0|A0A060X3E0_ONCMY Uncharacterized protein OS=Oncorhynchus mykiss OX=8022 GN=GSONMT00027836001 PE=3 SV=1	7;6;3;3;1	7;6;3;3;1	4;3;2;3;1	5	7	7	4	0	0	0	0	0	0	0	0	0	0	0	0	0	0	0	0	0	0	4	3	3	0	0	0	5	6	6	0	0	0	0	0	0	0	0	0	0	0	0	0	0	0
tr|A0A060Y8W0|A0A060Y8W0_ONCMY Ribosomal_L18e/L15P domain-containing protein OS=Oncorhynchus mykiss OX=8022 GN=GSONMT00040345001 PE=3 SV=1;tr|A0A060XZH5|A0A060XZH5_ONCMY Ribosomal_L18e/L15P domain-containing protein (Fragment) OS=Oncorhynchus mykiss OX=802	2;2	2;2	2;2	2	2	2	2	0	0	0	0	0	0	0	0	0	0	0	0	0	0	0	0	0	0	0	0	0	0	0	0	0	0	0	0	0	0	0	0	0	0	0	0	0	0	0	0	0	0
tr|A0A060Y9D5|A0A060Y9D5_ONCMY Uncharacterized protein OS=Oncorhynchus mykiss OX=8022 GN=GSONMT00051955001 PE=3 SV=1	1	1	1	1	1	1	1	0	0	0	0	0	0	0	0	0	0	0	0	0	0	0	0	0	0	0	1	1	0	0	0	0	0	0	0	0	0	0	0	0	0	0	0	0	0	0	0	0	0
tr|A0A060Y9M1|A0A060Y9M1_ONCMY Serotransferrin OS=Oncorhynchus mykiss OX=8022 GN=GSONMT00028984001 PE=3 SV=1	62;12;1;1	62;12;1;1	4;1;0;0	4	62	62	4	40	38	37	30	32	32	34	37	36	33	37	38	32	36	37	41	44	43	36	37	38	35	37	34	35	36	36	37	38	37	36	37	38	35	33	34	35	35	36	34	34	36
tr|A0A060Y9S3|A0A060Y9S3_ONCMY Uncharacterized protein OS=Oncorhynchus mykiss OX=8022 GN=GSONMT00023854001 PE=4 SV=1;tr|A0A060YGH7|A0A060YGH7_ONCMY Uncharacterized protein OS=Oncorhynchus mykiss OX=8022 GN=GSONMT00027339001 PE=4 SV=1	17;15	17;15	17;15	2	17	17	17	9	7	8	7	6	6	9	6	9	8	8	8	7	10	8	7	4	7	4	5	5	6	9	9	7	5	5	9	8	10	2	5	4	8	6	7	6	5	5	6	7	8
tr|A0A060YA04|A0A060YA04_ONCMY Uncharacterized protein OS=Oncorhynchus mykiss OX=8022 GN=GSONMT00028172001 PE=4 SV=1	1	1	1	1	1	1	1	0	0	0	0	0	0	1	1	1	0	0	0	0	0	0	0	0	0	0	0	0	1	0	0	0	0	0	1	1	1	0	1	1	0	0	0	0	0	0	0	0	0
tr|A0A060YA85|A0A060YA85_ONCMY Ig-like domain-containing protein OS=Oncorhynchus mykiss OX=8022 GN=GSONMT00024947001 PE=4 SV=1	2	1	1	1	2	1	1	1	1	1	1	1	0	1	2	1	1	1	1	1	1	0	0	0	0	1	1	1	2	1	1	2	2	2	1	0	1	2	1	1	0	1	1	1	1	1	1	0	1
tr|A0A060YAB1|A0A060YAB1_ONCMY M20_dimer domain-containing protein OS=Oncorhynchus mykiss OX=8022 GN=GSONMT00021406001 PE=3 SV=1	5;1	5;1	5;1	2	5	5	5	0	0	0	0	0	0	0	0	0	0	0	0	0	0	0	0	0	1	2	3	1	0	0	0	1	0	0	0	0	0	0	1	2	0	0	0	0	0	0	0	0	0
tr|A0A060YAQ4|A0A060YAQ4_ONCMY Peptidase S1 domain-containing protein OS=Oncorhynchus mykiss OX=8022 GN=GSONMT00020040001 PE=4 SV=1;tr|A0A060Y9J1|A0A060Y9J1_ONCMY Peptidase S1 domain-containing protein OS=Oncorhynchus mykiss OX=8022 GN=GSONMT00020042001 PE	2;2;1;1	2;2;1;1	2;2;1;1	4	2	2	2	0	0	0	0	0	0	0	2	0	0	0	0	0	0	0	0	0	0	0	0	0	1	0	0	0	0	0	0	0	0	0	0	0	0	0	0	0	0	0	0	0	0
tr|A0A060YB02|A0A060YB02_ONCMY Uncharacterized protein OS=Oncorhynchus mykiss OX=8022 GN=GSONMT00034844001 PE=3 SV=1;tr|A0A060YRB0|A0A060YRB0_ONCMY Uncharacterized protein OS=Oncorhynchus mykiss OX=8022 GN=GSONMT00056077001 PE=4 SV=1;tr|A0A060X798|A0A060X7	2;1;1	2;1;1	2;1;1	3	2	2	2	0	0	0	0	0	0	0	0	0	0	0	0	0	0	0	0	0	0	1	2	2	0	0	0	0	0	0	0	0	0	1	1	1	0	0	0	0	0	0	0	0	0
tr|A0A060YBF0|A0A060YBF0_ONCMY Ig-like domain-containing protein OS=Oncorhynchus mykiss OX=8022 GN=GSONMT00040013001 PE=4 SV=1	4	2	2	1	4	2	2	3	3	2	2	2	1	2	2	2	2	2	2	1	1	0	0	0	0	2	2	2	2	2	2	2	2	2	2	1	2	2	2	2	1	2	2	1	2	2	2	1	1
tr|A0A060YBI5|A0A060YBI5_ONCMY Arp2/3 complex 34 kDa subunit OS=Oncorhynchus mykiss OX=8022 GN=GSONMT00033346001 PE=3 SV=1;tr|A0A060YBW1|A0A060YBW1_ONCMY Arp2/3 complex 34 kDa subunit OS=Oncorhynchus mykiss OX=8022 GN=GSONMT00033602001 PE=3 SV=1	3;2	3;2	3;2	2	3	3	3	0	0	0	0	0	0	0	0	0	0	0	0	0	0	0	0	0	0	3	3	3	0	0	0	3	2	2	0	0	0	3	2	2	0	0	0	0	0	0	0	0	0
tr|A0A060YBJ2|A0A060YBJ2_ONCMY Ig-like domain-containing protein OS=Oncorhynchus mykiss OX=8022 GN=GSONMT00023383001 PE=4 SV=1	3	2	2	1	3	2	2	2	3	3	1	1	1	1	1	1	1	1	1	1	1	1	0	0	0	1	1	1	1	1	1	0	2	1	1	1	1	1	1	1	1	0	1	0	0	0	0	1	0
tr|A0A060YBM1|A0A060YBM1_ONCMY Jacalin-type lectin domain-containing protein OS=Oncorhynchus mykiss OX=8022 GN=GSONMT00039563001 PE=3 SV=1;tr|A0A060YL96|A0A060YL96_ONCMY Jacalin-type lectin domain-containing protein OS=Oncorhynchus mykiss OX=8022 GN=GSONMT	3;2;1;1;1	3;2;1;1;1	3;2;1;1;1	5	3	3	3	0	0	0	0	0	0	0	0	0	0	0	0	0	0	0	1	1	1	1	3	2	0	0	0	1	1	1	0	0	0	1	2	1	0	0	0	0	0	0	0	0	0
tr|A0A060YBS8|A0A060YBS8_ONCMY Uncharacterized protein OS=Oncorhynchus mykiss OX=8022 GN=GSONMT00015052001 PE=4 SV=1	7	3	3	1	7	3	3	4	3	3	6	6	6	5	4	5	6	5	6	1	2	2	4	4	4	5	5	5	6	6	6	2	2	2	5	4	6	6	5	5	6	6	6	5	4	5	6	6	5
tr|A0A060YC09|A0A060YC09_ONCMY UBC core domain-containing protein OS=Oncorhynchus mykiss OX=8022 GN=GSONMT00038443001 PE=3 SV=1;tr|A0A060XC88|A0A060XC88_ONCMY UBC core domain-containing protein OS=Oncorhynchus mykiss OX=8022 GN=GSONMT00015981001 PE=3 SV=1;	2;1;1	2;1;1	2;1;1	3	2	2	2	0	0	0	0	0	0	0	0	0	1	0	0	0	0	0	0	0	0	1	2	0	0	0	0	0	0	0	0	0	0	0	1	1	0	0	0	0	0	0	0	0	0
tr|A0A060YC37|A0A060YC37_ONCMY Lipocln_cytosolic_FA-bd_dom domain-containing protein OS=Oncorhynchus mykiss OX=8022 GN=GSONMT00038910001 PE=3 SV=1	4	3	3	1	4	3	3	3	2	1	1	1	2	2	1	2	1	3	2	2	3	3	0	0	1	3	3	3	3	1	2	3	3	3	3	4	2	3	2	2	1	0	0	0	1	0	1	1	1
tr|A0A060YC43|A0A060YC43_ONCMY Uncharacterized protein OS=Oncorhynchus mykiss OX=8022 GN=GSONMT00019921001 PE=4 SV=1	5	5	5	1	5	5	5	3	3	3	3	4	3	4	4	3	4	4	4	4	4	4	1	1	1	3	3	4	4	4	4	2	3	3	4	3	4	4	3	3	4	4	4	4	4	4	4	3	3
tr|A0A060YC58|A0A060YC58_ONCMY Uncharacterized protein OS=Oncorhynchus mykiss OX=8022 GN=GSONMT00054300001 PE=4 SV=1	3	2	2	1	3	2	2	3	3	3	1	2	2	2	1	1	1	0	1	0	0	1	0	1	1	0	0	1	2	2	2	1	0	0	2	2	2	2	1	2	2	2	2	1	1	1	2	2	2
tr|A0A060YCG7|A0A060YCG7_ONCMY Sushi domain-containing protein OS=Oncorhynchus mykiss OX=8022 GN=GSONMT00015053001 PE=4 SV=1	5	2	2	1	5	2	2	0	1	1	1	1	1	4	3	3	0	0	0	1	2	2	0	0	0	2	2	3	2	3	2	1	1	1	2	1	1	3	3	3	4	4	3	2	3	3	2	1	3
tr|A0A060YCI1|A0A060YCI1_ONCMY Uncharacterized protein OS=Oncorhynchus mykiss OX=8022 GN=GSONMT00016463001 PE=4 SV=1	13	7	2	1	13	7	2	6	7	6	5	7	6	9	9	10	6	5	6	9	8	7	7	6	5	9	6	8	7	8	6	6	9	8	10	10	9	7	5	7	8	8	9	7	7	7	7	7	8
tr|A0A060YCI5|A0A060YCI5_ONCMY Uncharacterized protein OS=Oncorhynchus mykiss OX=8022 GN=GSONMT00035051001 PE=4 SV=1	5	5	3	1	5	5	3	5	5	4	1	1	1	0	0	1	3	2	2	1	1	1	0	0	0	0	0	0	2	1	2	2	2	2	1	1	1	2	2	1	2	1	1	1	1	1	1	1	1
tr|A0A060YD01|A0A060YD01_ONCMY Uncharacterized protein (Fragment) OS=Oncorhynchus mykiss OX=8022 GN=GSONMT00058401001 PE=4 SV=1	13;3;1;1	11;3;1;1	10;2;1;1	4	13	11	10	7	8	7	6	6	7	9	8	9	9	9	7	10	10	10	4	3	3	8	9	6	8	9	10	6	7	6	9	9	9	8	8	8	6	7	7	6	6	7	8	8	7
tr|A0A060YD33|A0A060YD33_ONCMY CaMKII_AD domain-containing protein (Fragment) OS=Oncorhynchus mykiss OX=8022 GN=GSONMT00000586001 PE=4 SV=1	4	4	2	1	4	4	2	3	4	4	4	2	4	2	2	2	1	1	0	0	0	1	0	0	0	1	0	1	2	3	3	0	1	0	3	3	3	0	1	1	2	2	3	2	1	2	3	2	3
tr|A0A060YD65|A0A060YD65_ONCMY C1q domain-containing protein OS=Oncorhynchus mykiss OX=8022 GN=GSONMT00027710001 PE=4 SV=1;tr|A0A1C4HDA3|A0A1C4HDA3_ONCMY Trout C-polysaccharide binding protein 1, isoform 4 OS=Oncorhynchus mykiss OX=8022 GN=TCBP1 PE=2 SV=1;	6;5;3;3;1	2;1;1;1;1	2;1;1;1;1	5	6	2	2	0	0	0	0	0	0	2	3	3	0	0	0	3	3	3	2	1	2	6	4	6	3	3	2	1	0	0	0	0	0	0	0	0	2	2	3	0	1	1	2	3	2
tr|A0A060YDH1|A0A060YDH1_ONCMY Creatine kinase OS=Oncorhynchus mykiss OX=8022 GN=GSONMT00063882001 PE=3 SV=1	1	1	1	1	1	1	1	0	0	0	0	0	0	0	0	0	0	0	0	0	0	0	0	0	0	0	0	0	0	0	0	1	0	0	0	0	0	0	0	0	0	0	0	0	0	0	0	0	0
tr|A0A060YDJ4|A0A060YDJ4_ONCMY Uncharacterized protein OS=Oncorhynchus mykiss OX=8022 GN=GSONMT00040095001 PE=3 SV=1;tr|A0A060Z858|A0A060Z858_ONCMY Uncharacterized protein OS=Oncorhynchus mykiss OX=8022 GN=GSONMT00021034001 PE=3 SV=1;tr|A0A060X0G4|A0A060X0	7;6;4;2;2;2;2;2;2;1;1	2;1;1;1;1;1;1;1;1;1;1	2;1;1;1;1;1;1;1;1;1;1	11	7	2	2	0	0	1	0	1	0	0	0	0	0	0	1	0	0	0	0	0	0	4	3	3	0	0	0	3	2	3	0	0	0	1	1	1	0	0	0	0	0	0	0	0	0
tr|A0A060YDK5|A0A060YDK5_ONCMY Ig-like domain-containing protein OS=Oncorhynchus mykiss OX=8022 GN=GSONMT00019720001 PE=4 SV=1;tr|A0A060YRD9|A0A060YRD9_ONCMY Ig-like domain-containing protein (Fragment) OS=Oncorhynchus mykiss OX=8022 GN=GSONMT00061862001 P	3;2	3;2	2;2	2	3	3	2	2	2	2	2	1	2	1	1	1	2	1	1	1	1	1	1	1	1	1	1	1	2	2	1	1	1	1	1	1	1	1	1	1	1	2	1	1	1	1	1	2	1
tr|A0A060YDR3|A0A060YDR3_ONCMY Complement component 8 subunit beta OS=Oncorhynchus mykiss OX=8022 GN=GSONMT00044219001 PE=3 SV=1;sp|Q90X85|CO8B_ONCMY Complement component C8 beta chain OS=Oncorhynchus mykiss OX=8022 GN=c8b PE=2 SV=1	18;13	18;13	18;13	2	18	18	18	11	12	11	9	8	10	11	11	12	9	9	9	10	11	11	7	7	9	10	10	11	11	10	9	9	12	11	14	13	12	10	9	10	10	11	11	9	9	8	10	10	9
tr|A0A060YDZ1|A0A060YDZ1_ONCMY ADF-H domain-containing protein OS=Oncorhynchus mykiss OX=8022 GN=GSONMT00041121001 PE=3 SV=1	7;1;1	1;0;0	0;0;0	3	7	1	0	0	2	2	1	2	2	0	1	1	2	2	1	2	0	2	1	1	1	7	5	5	0	1	1	4	4	4	0	0	1	6	4	4	0	0	0	0	0	1	1	0	1
tr|A0A060YDZ6|A0A060YDZ6_ONCMY Hcy-binding domain-containing protein OS=Oncorhynchus mykiss OX=8022 GN=GSONMT00059992001 PE=4 SV=1;tr|A0A060XNB3|A0A060XNB3_ONCMY Hcy-binding domain-containing protein OS=Oncorhynchus mykiss OX=8022 GN=GSONMT00031577001 PE=4	2;2;1;1	2;2;1;1	2;2;1;1	4	2	2	2	0	0	0	0	0	0	0	0	0	0	0	0	0	0	0	0	0	0	0	1	0	0	0	0	1	0	1	0	0	0	0	0	0	1	0	0	0	0	0	0	0	0
tr|A0A060YEC0|A0A060YEC0_ONCMY GLOBIN domain-containing protein OS=Oncorhynchus mykiss OX=8022 GN=GSONMT00016594001 PE=3 SV=1	17	2	2	1	17	2	2	11	11	10	7	7	7	7	10	9	8	9	9	9	9	9	4	4	5	6	6	6	8	7	8	8	8	7	6	6	5	7	7	8	7	7	7	8	6	7	5	6	5
tr|A0A060YEL4|A0A060YEL4_ONCMY RNA helicase OS=Oncorhynchus mykiss OX=8022 GN=GSONMT00020229001 PE=4 SV=1;tr|A0A060XT90|A0A060XT90_ONCMY RNA helicase OS=Oncorhynchus mykiss OX=8022 GN=GSONMT00029317001 PE=4 SV=1;tr|A0A060WGT4|A0A060WGT4_ONCMY RNA helicase	3;3;3;3;2;1	3;3;3;3;2;1	3;3;3;3;2;1	6	3	3	3	0	0	0	0	0	0	0	0	0	0	0	0	0	0	0	0	0	0	0	0	0	0	0	0	0	0	0	0	0	0	0	0	0	0	0	0	0	0	0	0	0	0
tr|A0A060YET5|A0A060YET5_ONCMY Ig-like domain-containing protein OS=Oncorhynchus mykiss OX=8022 GN=GSONMT00036382001 PE=4 SV=1;tr|A0A060YXG6|A0A060YXG6_ONCMY Ig-like domain-containing protein OS=Oncorhynchus mykiss OX=8022 GN=GSONMT00046420001 PE=4 SV=1	4;2	3;1	2;0	2	4	3	2	3	3	2	2	2	2	3	3	3	4	2	2	1	1	1	0	0	1	2	2	1	2	2	2	3	3	3	1	2	2	1	2	2	2	2	1	1	1	1	1	1	1
tr|A0A060YFD8|A0A060YFD8_ONCMY Ig-like domain-containing protein OS=Oncorhynchus mykiss OX=8022 GN=GSONMT00032908001 PE=4 SV=1;tr|A0A060ZE77|A0A060ZE77_ONCMY Ig-like domain-containing protein OS=Oncorhynchus mykiss OX=8022 GN=GSONMT00024886001 PE=4 SV=1;tr	5;4;4	2;2;2	2;2;2	3	5	2	2	3	3	3	2	2	2	2	2	2	2	3	2	1	1	2	3	2	2	2	1	1	4	4	2	2	2	2	2	3	3	2	2	2	2	2	2	1	1	1	2	2	3
tr|A0A060YFW7|A0A060YFW7_ONCMY Uncharacterized protein OS=Oncorhynchus mykiss OX=8022 GN=GSONMT00023338001 PE=4 SV=1;tr|A0A060YEJ2|A0A060YEJ2_ONCMY Uncharacterized protein OS=Oncorhynchus mykiss OX=8022 GN=GSONMT00015695001 PE=4 SV=1	4;2	4;2	4;2	2	4	4	4	0	0	0	0	0	0	0	0	0	0	0	0	0	0	0	0	0	0	0	0	0	0	0	0	0	0	0	1	0	0	0	0	1	2	0	0	0	0	0	0	0	0
tr|A0A060YFX4|A0A060YFX4_ONCMY Secreted phosphoprotein 2 OS=Oncorhynchus mykiss OX=8022 GN=GSONMT00049136001 PE=3 SV=1;sp|Q70I47|SPP24_ONCMY Secreted phosphoprotein 24 OS=Oncorhynchus mykiss OX=8022 GN=spp2 PE=2 SV=1	2;2	2;2	2;2	2	2	2	2	0	0	0	0	0	0	0	0	0	0	0	0	0	0	0	0	0	0	0	0	0	1	1	1	0	0	0	1	0	0	0	0	0	0	0	0	0	0	0	0	0	0
tr|A0A060YG41|A0A060YG41_ONCMY Uncharacterized protein OS=Oncorhynchus mykiss OX=8022 GN=GSONMT00036908001 PE=4 SV=1	13	13	13	1	13	13	13	3	5	4	5	4	2	6	6	6	5	7	7	3	6	7	4	9	5	5	5	5	5	6	4	5	7	5	7	6	6	3	5	7	4	4	3	7	7	8	4	5	3
tr|A0A060YG72|A0A060YG72_ONCMY Ig-like domain-containing protein OS=Oncorhynchus mykiss OX=8022 GN=GSONMT00032909001 PE=4 SV=1;tr|A0A060ZB00|A0A060ZB00_ONCMY Ig-like domain-containing protein OS=Oncorhynchus mykiss OX=8022 GN=GSONMT00004198001 PE=4 SV=1;tr	2;1;1	1;0;0	1;0;0	3	2	1	1	1	1	1	0	1	1	1	1	1	1	1	1	0	1	1	0	0	0	0	0	0	1	2	1	0	1	1	1	1	1	1	1	1	1	2	2	0	0	0	0	1	0
tr|A0A060YGT2|A0A060YGT2_ONCMY CD44 antigen OS=Oncorhynchus mykiss OX=8022 GN=GSONMT00012655001 PE=4 SV=1	1	1	1	1	1	1	1	0	0	0	0	0	0	0	0	0	0	0	0	0	0	0	0	0	0	0	0	0	0	0	0	0	0	0	0	0	1	0	0	0	0	0	0	0	0	0	0	0	0
tr|A0A060YH37|A0A060YH37_ONCMY Uncharacterized protein OS=Oncorhynchus mykiss OX=8022 GN=GSONMT00012332001 PE=4 SV=1	29	29	29	1	29	29	29	15	16	15	14	16	16	15	16	17	16	17	18	18	17	17	16	17	16	13	17	15	15	16	14	13	9	13	13	14	14	14	14	13	13	13	14	14	13	15	17	15	16
tr|A0A060YI80|A0A060YI80_ONCMY Ig-like domain-containing protein OS=Oncorhynchus mykiss OX=8022 GN=GSONMT00040011001 PE=4 SV=1;tr|A0A060YQQ1|A0A060YQQ1_ONCMY Ig-like domain-containing protein (Fragment) OS=Oncorhynchus mykiss OX=8022 GN=GSONMT00058149001 P	1;1	1;1	1;1	2	1	1	1	0	0	0	0	0	0	0	0	1	0	0	0	0	0	0	0	0	0	0	0	0	0	0	0	0	0	0	0	0	0	0	0	0	0	0	0	0	0	0	0	0	0
tr|A0A060YIS7|A0A060YIS7_ONCMY Uncharacterized protein OS=Oncorhynchus mykiss OX=8022 GN=GSONMT00000125001 PE=4 SV=1	2	2	2	1	2	2	2	0	0	0	0	0	0	0	0	0	0	0	0	0	0	0	0	0	0	0	0	0	0	0	0	0	1	1	0	0	0	0	0	0	1	0	0	0	0	0	0	0	0
tr|A0A060YJ35|A0A060YJ35_ONCMY Ig-like domain-containing protein OS=Oncorhynchus mykiss OX=8022 GN=GSONMT00031888001 PE=4 SV=1	4	4	3	1	4	4	3	0	0	1	3	2	3	2	1	0	4	3	4	2	2	1	0	0	0	1	0	0	4	4	3	3	3	4	2	2	3	4	4	3	2	3	3	1	1	1	1	1	0
tr|A0A060YJ80|A0A060YJ80_ONCMY Ig-like domain-containing protein OS=Oncorhynchus mykiss OX=8022 GN=GSONMT00015842001 PE=4 SV=1	4	4	2	1	4	4	2	4	4	4	3	3	3	2	2	2	2	3	2	2	2	2	3	2	3	3	2	2	3	4	4	2	2	2	3	3	3	3	2	2	4	4	3	1	2	1	2	2	2
tr|A0A060YJ95|A0A060YJ95_ONCMY GLOBIN domain-containing protein OS=Oncorhynchus mykiss OX=8022 GN=GSONMT00001185001 PE=3 SV=1;tr|A0A060YIU5|A0A060YIU5_ONCMY GLOBIN domain-containing protein OS=Oncorhynchus mykiss OX=8022 GN=GSONMT00001187001 PE=3 SV=1;tr|A	2;2;1;1;1;1;1;1	2;2;1;1;1;1;1;1	2;2;1;1;1;1;1;1	8	2	2	2	0	0	0	0	0	0	0	0	0	0	1	0	0	0	0	0	0	0	0	0	0	0	0	0	0	0	0	0	0	0	0	0	0	0	0	0	0	0	0	0	0	0
tr|A0A060YJC7|A0A060YJC7_ONCMY GLOBIN domain-containing protein OS=Oncorhynchus mykiss OX=8022 GN=GSONMT00008810001 PE=3 SV=1	11	9	7	1	11	9	7	9	7	9	4	4	4	6	6	7	9	8	8	5	5	6	5	5	5	4	3	4	5	4	4	5	5	5	2	3	1	4	3	4	5	5	5	4	4	4	3	3	4
tr|A0A060YKA6|A0A060YKA6_ONCMY VWFA domain-containing protein OS=Oncorhynchus mykiss OX=8022 GN=GSONMT00045718001 PE=4 SV=1	9	8	8	1	9	8	8	1	1	1	2	3	2	1	1	1	5	2	3	2	1	2	4	5	5	4	3	2	1	2	0	2	4	2	6	5	4	3	2	2	1	3	2	1	1	1	2	2	1
tr|A0A060YKH3|A0A060YKH3_ONCMY Delta-aminolevulinic acid dehydratase OS=Oncorhynchus mykiss OX=8022 GN=GSONMT00049558001 PE=3 SV=1	1	1	1	1	1	1	1	0	0	0	0	0	0	0	0	0	0	0	0	0	0	0	0	0	0	0	0	0	0	0	0	0	0	0	0	0	0	0	0	0	0	0	0	0	0	0	0	0	0
tr|A0A060YKJ3|A0A060YKJ3_ONCMY 2-phospho-D-glycerate hydro-lyase OS=Oncorhynchus mykiss OX=8022 GN=GSONMT00016130001 PE=3 SV=1	6	4	3	1	6	4	3	2	0	1	0	0	0	1	1	1	1	1	1	0	0	0	2	2	3	4	6	5	2	1	2	4	4	5	1	1	1	4	5	2	1	1	0	1	1	1	0	0	1
tr|A0A060YKT0|A0A060YKT0_ONCMY Uncharacterized protein (Fragment) OS=Oncorhynchus mykiss OX=8022 GN=GSONMT00039369001 PE=3 SV=1	13	8	8	1	13	8	8	9	9	11	3	3	3	8	7	7	0	0	0	3	3	4	3	6	5	1	2	2	7	5	5	5	5	6	7	6	8	2	2	3	5	3	3	3	2	1	2	1	3
tr|A0A060YL40|A0A060YL40_ONCMY FAS1 domain-containing protein OS=Oncorhynchus mykiss OX=8022 GN=GSONMT00059660001 PE=4 SV=1	1	1	1	1	1	1	1	0	0	0	0	0	0	0	0	0	0	0	0	0	0	0	0	0	0	0	0	0	0	0	0	0	0	0	1	0	0	1	1	0	0	0	0	0	0	0	0	0	0
tr|A0A060YL99|A0A060YL99_ONCMY Protein S100 OS=Oncorhynchus mykiss OX=8022 GN=GSONMT00056947001 PE=3 SV=1	1	1	1	1	1	1	1	0	0	0	0	0	0	0	0	0	0	0	0	0	0	0	0	0	0	0	0	0	0	0	0	0	0	0	0	0	0	0	0	0	0	0	0	0	0	0	0	0	0
tr|A0A060YLA8|A0A060YLA8_ONCMY Apolipoprotein C Ib OS=Oncorhynchus mykiss OX=8022 GN=APOC-Ib PE=2 SV=1	8	6	6	1	8	6	6	5	4	4	3	3	2	4	3	4	4	4	4	3	4	5	6	6	6	3	3	3	2	4	2	2	2	3	2	3	2	3	3	3	3	4	3	2	2	1	2	4	4
tr|A0A060YLD3|A0A060YLD3_ONCMY Fructose-bisphosphate aldolase OS=Oncorhynchus mykiss OX=8022 GN=GSONMT00060394001 PE=3 SV=1;tr|A7L6A8|A7L6A8_ONCMY Fructose-bisphosphate aldolase (Fragment) OS=Oncorhynchus mykiss OX=8022 GN=ald-b PE=3 SV=1;tr|A0A060WVQ0|A0A	2;1;1	2;1;1	2;1;1	3	2	2	2	0	0	0	0	0	0	0	0	0	0	0	0	0	0	0	0	0	0	0	0	0	0	0	0	0	0	0	0	0	0	0	0	0	2	1	1	0	0	0	0	0	0
tr|A0A060YLV6|A0A060YLV6_ONCMY Uncharacterized protein (Fragment) OS=Oncorhynchus mykiss OX=8022 GN=GSONMT00004885001 PE=4 SV=1	1	1	1	1	1	1	1	0	0	0	0	0	0	0	0	0	0	0	0	0	0	0	0	0	0	0	0	0	0	0	0	0	0	0	0	0	0	0	0	0	0	0	0	0	0	0	0	0	0
tr|A0A060YLZ0|A0A060YLZ0_ONCMY Uncharacterized protein OS=Oncorhynchus mykiss OX=8022 GN=GSONMT00047978001 PE=4 SV=1	3	3	3	1	3	3	3	0	0	0	0	0	0	0	0	0	1	0	0	0	0	0	0	0	0	0	0	0	0	0	0	0	0	0	0	0	0	0	0	0	0	0	0	0	0	0	0	0	0
tr|A0A060YM30|A0A060YM30_ONCMY Sushi domain-containing protein OS=Oncorhynchus mykiss OX=8022 GN=GSONMT00056892001 PE=4 SV=1	6	6	6	1	6	6	6	2	2	2	1	2	2	3	4	3	0	2	0	2	2	2	1	2	1	3	3	4	3	2	3	2	1	2	2	1	2	3	5	4	3	2	2	3	3	3	2	3	3
tr|A0A060YM51|A0A060YM51_ONCMY Uncharacterized protein OS=Oncorhynchus mykiss OX=8022 GN=GSONMT00000536001 PE=3 SV=1	13	6	6	1	13	6	6	9	10	6	7	7	8	6	5	7	6	6	7	7	6	5	7	8	10	4	5	6	5	8	6	6	7	7	8	8	6	8	5	8	5	7	8	7	8	7	5	5	6
tr|A0A060YM71|A0A060YM71_ONCMY Thioredoxin domain-containing protein OS=Oncorhynchus mykiss OX=8022 GN=GSONMT00058662001 PE=3 SV=1;tr|A0A060YDT1|A0A060YDT1_ONCMY Thioredoxin domain-containing protein OS=Oncorhynchus mykiss OX=8022 GN=GSONMT00005272001 PE=3	7;6;1;1	7;6;1;1	6;5;1;1	4	7	7	6	1	0	1	1	0	1	0	0	0	1	1	1	0	1	0	0	0	0	1	1	1	0	1	1	1	1	1	0	0	0	1	1	1	1	1	1	0	0	0	0	0	0
tr|A0A060YMF6|A0A060YMF6_ONCMY Uncharacterized protein OS=Oncorhynchus mykiss OX=8022 GN=GSONMT00044276001 PE=3 SV=1	5	5	5	1	5	5	5	0	0	0	0	0	0	1	2	3	1	2	1	0	1	1	0	1	0	0	0	0	1	2	2	0	0	0	2	2	1	0	1	1	1	1	1	0	0	0	0	0	0
tr|A0A060YMI7|A0A060YMI7_ONCMY Transferrin receptor protein 1 OS=Oncorhynchus mykiss OX=8022 GN=GSONMT00038807001 PE=3 SV=1	2	2	2	1	2	2	2	0	0	1	0	0	0	0	0	0	0	0	0	0	0	0	0	0	0	0	0	0	0	0	0	0	0	0	0	0	0	0	0	0	0	0	0	0	0	0	0	0	0
tr|A0A060YMN5|A0A060YMN5_ONCMY Fibrinogen C-terminal domain-containing protein OS=Oncorhynchus mykiss OX=8022 GN=GSONMT00024302001 PE=4 SV=1	7	7	7	1	7	7	7	0	0	0	1	1	1	0	0	0	0	0	0	0	0	0	3	4	1	2	1	3	0	0	0	0	0	0	0	0	0	2	1	1	0	0	0	0	0	0	0	0	0
tr|A0A060YMY7|A0A060YMY7_ONCMY CN hydrolase domain-containing protein OS=Oncorhynchus mykiss OX=8022 GN=GSONMT00004777001 PE=3 SV=1	1	1	1	1	1	1	1	1	1	1	1	1	1	1	1	1	1	1	1	1	1	1	1	1	1	1	1	1	1	1	1	1	1	1	1	1	1	1	1	1	1	1	1	1	1	1	1	1	1
tr|A0A060YNE1|A0A060YNE1_ONCMY Ig-like domain-containing protein OS=Oncorhynchus mykiss OX=8022 GN=GSONMT00026292001 PE=4 SV=1	2	1	0	1	2	1	0	2	1	1	2	2	2	1	1	1	1	1	1	1	1	1	1	1	1	1	1	1	1	1	1	1	1	1	0	1	1	1	1	2	1	1	1	1	0	1	1	1	1
tr|A0A060YNF5|A0A060YNF5_ONCMY Myosin motor domain-containing protein (Fragment) OS=Oncorhynchus mykiss OX=8022 GN=GSONMT00014917001 PE=3 SV=1	42	42	0	1	42	42	0	0	0	0	0	0	0	0	0	0	0	0	0	0	0	0	3	3	4	29	27	33	0	0	0	24	24	27	0	0	0	3	4	3	0	0	0	0	0	0	0	0	0
tr|A0A060YNP5|A0A060YNP5_ONCMY GLOBIN domain-containing protein OS=Oncorhynchus mykiss OX=8022 GN=GSONMT00058135001 PE=3 SV=1	3	1	1	1	3	1	1	3	3	3	2	3	2	3	2	3	3	3	3	3	3	3	1	1	1	3	2	1	3	3	3	3	3	3	1	2	2	3	3	2	2	3	3	3	3	3	0	0	1
tr|A0A060YNX8|A0A060YNX8_ONCMY Cell division control protein 42 homolog OS=Oncorhynchus mykiss OX=8022 GN=GSONMT00044675001 PE=3 SV=1;tr|A0A060XUN0|A0A060XUN0_ONCMY Cell division control protein 42 homolog OS=Oncorhynchus mykiss OX=8022 GN=GSONMT0000085400	1;1;1;1	1;1;1;1	1;1;1;1	4	1	1	1	1	0	1	0	0	0	0	0	0	0	0	0	0	1	0	0	0	0	1	0	0	0	0	0	0	0	1	0	0	0	1	1	0	0	0	0	0	0	0	0	0	0
tr|A0A060YP37|A0A060YP37_ONCMY GLOBIN domain-containing protein OS=Oncorhynchus mykiss OX=8022 GN=GSONMT00058133001 PE=3 SV=1;tr|C1BEX8|C1BEX8_ONCMY Hemoglobin subunit beta-1 OS=Oncorhynchus mykiss OX=8022 GN=HBB1 PE=2 SV=1	19;11	19;11	3;3	2	19	19	3	13	12	12	10	10	10	10	11	11	10	10	11	11	11	11	5	7	8	8	9	9	10	9	10	11	11	10	10	10	8	10	10	11	9	10	10	11	9	8	6	8	6
tr|A0A060YPA4|A0A060YPA4_ONCMY Ig-like domain-containing protein OS=Oncorhynchus mykiss OX=8022 GN=GSONMT00042335001 PE=4 SV=1	3	2	2	1	3	2	2	1	1	1	1	1	1	1	0	0	3	2	1	0	0	0	0	1	1	1	0	0	2	2	2	1	1	1	1	1	1	0	0	1	3	2	2	0	0	0	0	0	0
tr|A0A060YPM2|A0A060YPM2_ONCMY Uncharacterized protein OS=Oncorhynchus mykiss OX=8022 GN=GSONMT00011427001 PE=4 SV=1	9	2	2	1	9	2	2	2	1	2	0	0	0	4	2	3	2	1	2	0	1	1	0	0	1	2	2	1	1	1	2	0	2	2	3	5	5	2	2	2	0	0	1	0	0	0	0	0	0
tr|A0A060YPN6|A0A060YPN6_ONCMY Lumican OS=Oncorhynchus mykiss OX=8022 GN=GSONMT00021172001 PE=3 SV=1	10	4	4	1	10	4	4	6	5	5	4	5	5	5	5	5	3	4	4	7	7	6	5	6	6	8	8	8	7	7	6	8	7	7	7	8	5	9	9	9	6	6	6	7	5	7	7	6	8
tr|A0A060YPU6|A0A060YPU6_ONCMY PK_C domain-containing protein (Fragment) OS=Oncorhynchus mykiss OX=8022 GN=GSONMT00032476001 PE=4 SV=1	4	3	3	1	4	3	3	0	0	0	0	0	0	0	0	0	0	0	0	0	0	0	0	0	0	4	4	4	0	0	0	4	4	4	0	0	0	0	0	0	0	0	0	0	0	0	0	0	0
tr|A0A060YQ40|A0A060YQ40_ONCMY Uncharacterized protein OS=Oncorhynchus mykiss OX=8022 GN=GSONMT00002608001 PE=4 SV=1	9;1	9;1	9;1	2	9	9	9	4	5	5	1	1	2	1	2	1	1	2	1	1	2	1	0	0	0	1	2	2	4	3	4	3	2	4	3	4	4	3	4	3	1	3	1	0	0	0	2	2	2
tr|A0A060YQ67|A0A060YQ67_ONCMY Uncharacterized protein OS=Oncorhynchus mykiss OX=8022 GN=GSONMT00033138001 PE=4 SV=1	8	8	8	1	8	8	8	4	4	4	2	2	2	4	5	4	3	2	2	2	3	2	3	3	3	3	3	3	5	2	1	5	4	4	3	3	3	3	5	3	3	3	3	2	3	3	3	3	3
tr|A0A060YQH0|A0A060YQH0_ONCMY Uncharacterized protein (Fragment) OS=Oncorhynchus mykiss OX=8022 GN=GSONMT00017019001 PE=3 SV=1	1	1	1	1	1	1	1	0	0	0	0	0	0	0	0	0	0	0	0	0	0	0	0	0	0	0	1	1	1	0	0	1	1	1	0	0	0	1	0	0	0	0	0	0	0	0	0	0	0
tr|A0A060YQZ1|A0A060YQZ1_ONCMY Ig-like domain-containing protein OS=Oncorhynchus mykiss OX=8022 GN=GSONMT00031890001 PE=4 SV=1	3;1	1;1	1;1	2	3	1	1	3	3	3	2	3	3	2	2	2	2	2	3	1	2	3	2	2	2	2	1	2	2	3	3	1	3	3	2	3	3	3	3	3	2	3	3	0	2	0	2	3	1
tr|A0A060YRG9|A0A060YRG9_ONCMY Fibronectin type-I domain-containing protein OS=Oncorhynchus mykiss OX=8022 GN=GSONMT00031282001 PE=4 SV=1	5	5	5	1	5	5	5	3	3	3	3	3	3	3	3	3	3	2	3	3	3	4	3	3	4	3	3	3	3	3	2	2	2	3	4	4	3	4	3	4	2	2	2	1	1	3	2	3	3
tr|A0A060YRH9|A0A060YRH9_ONCMY Apolipoprotein H OS=Oncorhynchus mykiss OX=8022 GN=GSONMT00027814001 PE=4 SV=1	10	5	5	1	10	5	5	8	7	6	5	5	5	6	6	7	6	7	7	7	6	6	2	1	2	6	5	5	6	7	7	5	6	6	6	5	7	5	6	6	7	5	6	5	5	6	6	6	5
tr|A0A060YRL0|A0A060YRL0_ONCMY Uncharacterized protein OS=Oncorhynchus mykiss OX=8022 GN=GSONMT00037697001 PE=3 SV=1	3;1;1;1;1	3;1;1;1;1	3;1;1;1;1	5	3	3	3	0	0	0	0	0	0	0	1	1	0	0	0	0	0	0	1	1	2	0	0	0	0	1	0	0	0	0	0	1	1	0	1	0	0	0	0	0	0	0	0	0	0
tr|A0A060YSA7|A0A060YSA7_ONCMY Uncharacterized protein (Fragment) OS=Oncorhynchus mykiss OX=8022 GN=GSONMT00031281001 PE=4 SV=1	20	20	19	1	20	20	19	13	13	12	15	10	12	11	12	12	10	8	10	13	14	13	14	11	13	11	12	12	12	12	12	11	11	13	14	14	11	15	13	12	10	12	11	8	8	8	11	8	9
tr|A0A060YSH4|A0A060YSH4_ONCMY Uncharacterized protein OS=Oncorhynchus mykiss OX=8022 GN=GSONMT00059022001 PE=3 SV=1	20	20	19	1	20	20	19	8	12	9	9	9	11	12	10	11	11	11	12	12	12	11	10	9	10	12	12	12	14	16	15	8	8	8	14	13	14	11	12	11	12	12	12	10	9	10	11	9	12
tr|A0A060YST0|A0A060YST0_ONCMY Uncharacterized protein OS=Oncorhynchus mykiss OX=8022 GN=GSONMT00003889001 PE=4 SV=1	7	7	7	1	7	7	7	0	0	0	0	0	0	0	0	0	1	1	0	0	0	0	4	4	5	5	5	4	1	0	0	5	4	4	1	1	1	5	5	5	0	0	0	4	2	2	0	0	0
tr|A0A060YSX4|A0A060YSX4_ONCMY A2M_recep domain-containing protein (Fragment) OS=Oncorhynchus mykiss OX=8022 GN=GSONMT00060729001 PE=4 SV=1	20	20	20	1	20	20	20	7	7	8	2	1	1	6	7	5	4	4	4	11	12	12	5	5	5	8	8	7	6	8	8	0	1	0	7	6	4	9	11	8	10	10	11	8	6	8	10	2	7
tr|A0A060YT42|A0A060YT42_ONCMY Alpha-amylase OS=Oncorhynchus mykiss OX=8022 GN=GSONMT00023367001 PE=3 SV=1	7	7	7	1	7	7	7	0	0	0	0	0	0	2	3	2	1	1	0	2	1	1	0	0	0	2	2	4	3	2	2	0	0	0	2	2	2	1	1	1	1	1	1	0	0	0	0	0	0
tr|A0A060YTC6|A0A060YTC6_ONCMY Anaphylatoxin-like domain-containing protein OS=Oncorhynchus mykiss OX=8022 GN=GSONMT00060730001 PE=4 SV=1	6	6	6	1	6	6	6	2	2	1	2	2	2	3	3	3	3	2	3	4	4	4	3	3	3	4	4	4	4	5	4	2	2	1	4	4	4	4	5	5	5	5	5	5	4	2	5	4	4
tr|A0A060YTY3|A0A060YTY3_ONCMY Ig-like domain-containing protein OS=Oncorhynchus mykiss OX=8022 GN=GSONMT00063893001 PE=4 SV=1;tr|A0A060ZCI0|A0A060ZCI0_ONCMY Ig-like domain-containing protein OS=Oncorhynchus mykiss OX=8022 GN=GSONMT00033137001 PE=4 SV=1	3;2;1	2;1;1	2;1;1	3	3	2	2	2	3	2	1	1	1	1	1	1	1	1	1	1	1	1	0	0	0	1	1	1	0	1	1	0	1	1	1	1	1	1	1	0	1	0	1	0	0	0	0	1	0
tr|A0A060YU26|A0A060YU26_ONCMY Ig-like domain-containing protein OS=Oncorhynchus mykiss OX=8022 GN=GSONMT00050916001 PE=4 SV=1	1	1	1	1	1	1	1	1	1	1	0	0	0	0	0	0	0	1	1	0	0	0	0	0	0	0	0	0	0	0	1	1	1	1	1	1	1	1	0	0	0	0	0	0	0	0	0	0	0
tr|A0A060YU50|A0A060YU50_ONCMY Uncharacterized protein OS=Oncorhynchus mykiss OX=8022 GN=GSONMT00052017001 PE=4 SV=1	8	8	8	1	8	8	8	8	8	8	6	5	6	5	6	5	6	8	8	8	6	7	2	2	2	5	4	5	7	6	6	5	5	5	7	7	7	3	1	3	6	6	7	3	4	3	7	5	8
tr|A0A060YUP0|A0A060YUP0_ONCMY Ig-like domain-containing protein OS=Oncorhynchus mykiss OX=8022 GN=GSONMT00043517001 PE=4 SV=1	3;1	2;1	2;1	2	3	2	2	2	2	2	2	2	2	1	1	2	1	1	1	1	1	1	2	0	1	2	2	1	2	2	2	1	1	1	2	2	2	2	2	2	2	2	1	0	0	0	1	1	1
tr|A0A060YUR5|A0A060YUR5_ONCMY Sushi domain-containing protein OS=Oncorhynchus mykiss OX=8022 GN=GSONMT00056891001 PE=4 SV=1	5	3	3	1	5	3	3	2	3	2	3	3	3	3	3	3	3	3	3	2	3	2	1	1	1	3	3	3	3	3	3	2	2	2	3	3	3	3	3	3	3	3	3	4	4	5	3	2	3
tr|A0A060YV08|A0A060YV08_ONCMY Transaldolase (Fragment) OS=Oncorhynchus mykiss OX=8022 GN=GSONMT00054689001 PE=3 SV=1;tr|A0A060YVM5|A0A060YVM5_ONCMY Transaldolase (Fragment) OS=Oncorhynchus mykiss OX=8022 GN=GSONMT00016562001 PE=3 SV=1	8;7	8;7	8;7	2	8	8	8	0	0	0	0	0	0	0	0	1	1	0	0	0	0	0	1	1	0	7	6	6	1	0	0	2	2	0	1	0	1	4	5	5	1	0	0	0	0	0	0	0	0
tr|A0A060YV53|A0A060YV53_ONCMY Peptidase S1 domain-containing protein OS=Oncorhynchus mykiss OX=8022 GN=GSONMT00031633001 PE=4 SV=1	8	8	8	1	8	8	8	6	7	8	7	7	5	5	5	6	6	6	5	6	5	6	2	2	2	7	5	5	5	7	7	6	7	6	6	5	6	6	7	6	7	7	7	5	4	3	6	5	6
tr|A0A060YV62|A0A060YV62_ONCMY Ig-like domain-containing protein OS=Oncorhynchus mykiss OX=8022 GN=GSONMT00043518001 PE=4 SV=1	4	2	1	1	4	2	1	3	3	3	1	1	1	2	2	2	1	2	1	1	1	2	1	1	1	1	1	1	3	3	1	1	1	2	1	2	2	1	2	2	1	1	1	1	1	1	2	1	2
tr|A0A060YV80|A0A060YV80_ONCMY Uncharacterized protein OS=Oncorhynchus mykiss OX=8022 GN=GSONMT00026742001 PE=4 SV=1	4	4	3	1	4	4	3	3	4	3	2	3	2	3	4	4	1	3	4	3	4	4	1	0	1	3	3	3	4	3	2	2	3	2	2	3	4	3	3	3	2	2	2	1	1	1	1	2	1
tr|A0A060YVB2|A0A060YVB2_ONCMY Cytosolic malate dehydrogenase OS=Oncorhynchus mykiss OX=8022 GN=GSONMT00027468001 PE=3 SV=1	7;2	7;2	7;2	2	7	7	7	2	2	1	1	1	1	2	2	3	1	1	2	1	1	1	3	3	3	4	4	3	3	2	2	3	2	3	0	2	2	4	4	4	1	1	1	0	0	0	0	0	1
tr|A0A060YVB8|A0A060YVB8_ONCMY Ig-like domain-containing protein OS=Oncorhynchus mykiss OX=8022 GN=GSONMT00050917001 PE=4 SV=1	3	2	2	1	3	2	2	1	1	1	0	0	0	0	0	0	1	1	1	0	0	0	0	0	0	1	0	0	1	0	1	1	1	1	0	0	0	1	1	0	0	0	0	0	0	0	1	0	0
tr|A0A060YVD3|A0A060YVD3_ONCMY Uncharacterized protein (Fragment) OS=Oncorhynchus mykiss OX=8022 GN=GSONMT00000751001 PE=4 SV=1;tr|Q90WC6|Q90WC6_ONCMY Myosin light chain 3 OS=Oncorhynchus mykiss OX=8022 PE=2 SV=1	3;3	2;2	2;2	2	3	2	2	0	0	0	0	0	0	0	0	0	0	0	0	0	0	0	0	0	0	3	3	3	0	0	0	1	1	3	0	0	0	0	0	0	0	0	0	0	0	0	0	0	0
tr|A0A060YWF7|A0A060YWF7_ONCMY Uncharacterized protein OS=Oncorhynchus mykiss OX=8022 GN=GSONMT00006782001 PE=4 SV=1;tr|A0A061AC93|A0A061AC93_ONCMY Uncharacterized protein OS=Oncorhynchus mykiss OX=8022 GN=GSONMT00002671001 PE=4 SV=1	2;1	2;1	2;1	2	2	2	2	0	0	0	1	1	1	1	1	1	1	1	1	0	0	0	1	1	2	1	1	1	1	0	0	1	1	1	0	0	0	0	1	1	1	1	1	0	0	0	0	1	0
tr|A0A060YWQ3|A0A060YWQ3_ONCMY 2-phospho-D-glycerate hydro-lyase OS=Oncorhynchus mykiss OX=8022 GN=GSONMT00046561001 PE=3 SV=1	16	16	4	1	16	16	4	6	5	5	2	2	2	1	1	1	1	0	0	0	1	1	4	4	7	12	14	14	2	2	1	12	12	12	1	1	2	7	7	6	1	1	0	6	6	7	0	0	1
tr|A0A060YWY3|A0A060YWY3_ONCMY Fibrinogen C-terminal domain-containing protein OS=Oncorhynchus mykiss OX=8022 GN=GSONMT00010099001 PE=4 SV=1	3;1	3;1	3;1	2	3	3	3	1	2	1	3	3	3	0	0	0	0	0	0	2	2	1	3	2	3	3	3	3	0	2	1	2	2	2	0	0	0	3	3	3	0	0	1	0	1	1	0	0	0
tr|A0A060YX59|A0A060YX59_ONCMY Ig-like domain-containing protein OS=Oncorhynchus mykiss OX=8022 GN=GSONMT00017581001 PE=4 SV=1	4	1	1	1	4	1	1	3	4	2	2	3	3	1	4	3	2	3	3	1	1	1	1	2	2	1	2	2	2	4	3	2	2	2	2	2	2	4	4	3	2	2	2	1	1	1	2	1	1
tr|A0A060YXB0|A0A060YXB0_ONCMY Uncharacterized protein OS=Oncorhynchus mykiss OX=8022 GN=GSONMT00062464001 PE=4 SV=1;tr|A0A060X485|A0A060X485_ONCMY Uncharacterized protein OS=Oncorhynchus mykiss OX=8022 GN=GSONMT00011167001 PE=4 SV=1	2;2	2;2	2;2	2	2	2	2	0	0	0	0	0	0	0	0	0	0	0	0	0	0	0	0	0	0	0	0	0	0	1	0	0	0	1	0	0	0	0	0	0	0	0	0	0	0	0	0	0	0
tr|A0A060YXK5|A0A060YXK5_ONCMY Uncharacterized protein OS=Oncorhynchus mykiss OX=8022 GN=GSONMT00043138001 PE=4 SV=1	5	5	5	1	5	5	5	1	1	1	1	1	1	1	1	1	2	2	2	2	2	2	5	5	5	3	3	2	2	2	1	1	1	1	1	1	1	2	2	2	1	1	1	2	2	2	1	0	2
tr|A0A060YXP2|A0A060YXP2_ONCMY Uncharacterized protein OS=Oncorhynchus mykiss OX=8022 GN=GSONMT00040850001 PE=4 SV=1;tr|C1BI85|C1BI85_ONCMY Proteasome subunit beta OS=Oncorhynchus mykiss OX=8022 GN=PSB2 PE=2 SV=1;tr|C1BH71|C1BH71_ONCMY Proteasome subunit b	2;2;2;2	2;2;2;2	1;1;1;1	4	2	2	1	0	0	0	0	0	0	0	0	0	0	0	0	0	0	0	0	0	0	1	1	1	0	0	0	1	1	1	0	0	0	0	0	0	0	0	0	0	0	0	0	0	0
tr|A0A060YXV0|A0A060YXV0_ONCMY Uncharacterized protein OS=Oncorhynchus mykiss OX=8022 GN=GSONMT00033738001 PE=4 SV=1	4	4	1	1	4	4	1	1	1	2	2	2	1	2	3	3	2	3	4	3	3	2	2	2	2	3	3	4	3	2	3	2	2	2	3	3	3	3	3	4	1	2	1	1	1	1	1	1	2
tr|A0A060YY24|A0A060YY24_ONCMY Lumican OS=Oncorhynchus mykiss OX=8022 GN=GSONMT00018287001 PE=3 SV=1	14	14	8	1	14	14	8	6	6	6	5	6	6	6	5	5	3	3	4	6	6	6	8	9	11	8	8	8	7	7	7	7	6	7	6	7	6	8	9	9	6	7	7	7	5	7	7	6	8
tr|A0A060YY79|A0A060YY79_ONCMY Uncharacterized protein (Fragment) OS=Oncorhynchus mykiss OX=8022 GN=GSONMT00034796001 PE=4 SV=1	1	1	1	1	1	1	1	0	0	0	0	0	0	0	0	0	0	0	0	0	0	0	0	0	0	1	1	0	0	0	0	0	0	0	0	0	0	0	0	0	0	0	0	0	0	0	0	0	0
tr|A0A060YYK6|A0A060YYK6_ONCMY Ig-like domain-containing protein OS=Oncorhynchus mykiss OX=8022 GN=GSONMT00039572001 PE=4 SV=1	3	3	2	1	3	3	2	1	2	1	0	1	1	2	1	1	1	1	1	0	1	1	0	0	0	0	0	0	1	1	1	2	2	2	1	1	1	1	1	1	0	1	1	0	0	0	0	1	0
tr|A0A060YZ66|A0A060YZ66_ONCMY TED_complement domain-containing protein OS=Oncorhynchus mykiss OX=8022 GN=GSONMT00005075001 PE=4 SV=1;tr|A0A060Z9B7|A0A060Z9B7_ONCMY TED_complement domain-containing protein OS=Oncorhynchus mykiss OX=8022 GN=GSONMT0000106000	9;6	4;2	4;2	2	9	4	4	5	3	6	3	2	2	4	3	5	4	3	3	4	3	3	3	3	2	3	3	3	4	3	2	3	4	4	4	5	4	3	3	3	5	5	3	3	3	2	3	2	2
tr|A0A060YZ76|A0A060YZ76_ONCMY Apolipoprotein H OS=Oncorhynchus mykiss OX=8022 GN=GSONMT00027813001 PE=4 SV=1	8	8	7	1	8	8	7	4	4	3	2	2	4	3	3	3	4	5	5	4	4	4	3	3	3	4	4	4	4	6	6	3	3	2	5	4	5	4	3	3	4	4	3	4	4	4	4	4	3
tr|A0A060YZ84|A0A060YZ84_ONCMY A2M_N_2 domain-containing protein (Fragment) OS=Oncorhynchus mykiss OX=8022 GN=GSONMT00047190001 PE=4 SV=1	17	12	10	1	17	12	10	10	12	13	9	9	9	11	11	13	10	11	12	9	11	13	6	8	7	6	9	11	12	12	10	8	9	10	12	12	12	12	12	10	10	8	12	8	8	7	9	12	11
tr|A0A060YZD4|A0A060YZD4_ONCMY Ig-like domain-containing protein OS=Oncorhynchus mykiss OX=8022 GN=GSONMT00056921001 PE=4 SV=1	3	2	2	1	3	2	2	3	3	2	1	1	0	1	1	1	3	2	3	1	1	0	0	0	0	1	1	1	2	2	2	1	1	1	1	0	1	3	2	1	0	1	2	3	3	1	1	0	1
tr|A0A060YZE3|A0A060YZE3_ONCMY Uncharacterized protein OS=Oncorhynchus mykiss OX=8022 GN=GSONMT00047589001 PE=4 SV=1;tr|A0A060YTX4|A0A060YTX4_ONCMY Uncharacterized protein (Fragment) OS=Oncorhynchus mykiss OX=8022 GN=GSONMT00004464001 PE=4 SV=1	2;2	2;2	2;2	2	2	2	2	0	0	0	0	0	0	0	0	0	0	0	0	0	0	0	0	0	0	1	0	0	0	0	0	0	2	2	0	0	0	2	0	1	0	0	0	0	0	0	0	0	0
tr|A0A060YZJ8|A0A060YZJ8_ONCMY Ig-like domain-containing protein OS=Oncorhynchus mykiss OX=8022 GN=GSONMT00007388001 PE=4 SV=1	2	1	1	1	2	1	1	1	1	1	1	1	1	1	1	1	0	0	1	0	0	1	0	0	0	0	0	1	1	1	1	1	0	0	1	1	1	1	0	1	2	2	2	1	1	1	1	1	1
tr|A0A060YZR6|A0A060YZR6_ONCMY Peptidase S1 domain-containing protein OS=Oncorhynchus mykiss OX=8022 GN=GSONMT00030399001 PE=4 SV=1	16;5;5	11;3;3	11;3;3	3	16	11	11	0	0	0	2	3	3	5	6	5	8	7	8	7	9	9	14	15	14	12	12	12	6	5	6	12	11	11	7	6	5	12	12	12	7	6	5	13	13	13	1	0	2
tr|A0A060Z062|A0A060Z062_ONCMY Ig-like domain-containing protein OS=Oncorhynchus mykiss OX=8022 GN=GSONMT00013635001 PE=4 SV=1	3	2	2	1	3	2	2	2	2	2	1	2	2	2	2	2	2	2	2	1	2	2	0	1	1	1	1	1	3	3	2	1	2	2	2	2	2	2	3	3	1	2	2	1	1	1	1	2	1
tr|A0A060Z084|A0A060Z084_ONCMY NTR domain-containing protein OS=Oncorhynchus mykiss OX=8022 GN=GSONMT00023976001 PE=4 SV=1	3	1	1	1	3	1	1	0	0	0	0	0	0	2	1	3	1	0	0	2	1	0	0	0	0	2	0	0	0	0	0	0	0	0	1	0	0	0	0	0	1	0	0	0	0	0	0	0	0
tr|A0A060Z0F5|A0A060Z0F5_ONCMY Aldedh domain-containing protein OS=Oncorhynchus mykiss OX=8022 GN=GSONMT00052159001 PE=4 SV=1	1	1	1	1	1	1	1	0	0	0	0	0	0	0	0	0	0	0	0	0	0	0	0	0	0	0	0	0	0	0	0	0	0	0	0	0	0	0	0	0	1	1	1	0	0	0	0	0	0
tr|A0A060Z0N7|A0A060Z0N7_ONCMY TGc domain-containing protein OS=Oncorhynchus mykiss OX=8022 GN=GSONMT00011732001 PE=3 SV=1	4	4	4	1	4	4	4	0	2	1	0	0	0	2	1	2	1	0	0	0	0	0	0	0	0	0	0	0	1	0	0	0	0	0	0	0	0	0	0	0	0	0	0	0	0	0	0	0	0
tr|A0A060Z1T2|A0A060Z1T2_ONCMY Fibrinogen C-terminal domain-containing protein OS=Oncorhynchus mykiss OX=8022 GN=GSONMT00008870001 PE=4 SV=1	3	3	3	1	3	3	3	0	0	0	0	0	0	0	0	0	1	0	0	1	0	1	2	2	1	0	0	0	0	0	0	0	0	0	0	0	0	0	0	0	0	0	0	0	0	0	0	0	0
tr|A0A060Z1U0|A0A060Z1U0_ONCMY Uncharacterized protein (Fragment) OS=Oncorhynchus mykiss OX=8022 GN=GSONMT00018997001 PE=4 SV=1;tr|A0A060WHT7|A0A060WHT7_ONCMY Uncharacterized protein OS=Oncorhynchus mykiss OX=8022 GN=GSONMT00075636001 PE=4 SV=1	2;1	2;1	2;1	2	2	2	2	0	0	0	0	0	0	0	0	0	0	0	0	0	0	0	0	0	0	0	0	0	0	0	0	0	0	0	0	0	0	0	0	0	0	0	0	0	0	0	0	0	0
tr|A0A060Z268|A0A060Z268_ONCMY Insulin-like growth factor-binding protein 1 (Fragment) OS=Oncorhynchus mykiss OX=8022 GN=GSONMT00051137001 PE=4 SV=1;tr|M4QG84|M4QG84_SALSA Insulin-like growth factor-binding protein 1 OS=Salmo salar OX=8030 GN=IGFBP-1A1 PE=	2;2;2	2;2;2	2;2;2	3	2	2	2	0	0	0	0	0	0	0	0	0	0	0	0	0	0	0	0	0	0	0	0	0	0	0	0	0	0	0	0	0	0	0	0	1	0	0	0	0	0	0	0	0	0
tr|A0A060Z272|A0A060Z272_ONCMY C-type lectin domain-containing protein OS=Oncorhynchus mykiss OX=8022 GN=GSONMT00050956001 PE=4 SV=1;tr|B5KWB2|B5KWB2_ONCMY Mannan-binding lectin H2 OS=Oncorhynchus mykiss OX=8022 PE=2 SV=1	8;7	8;7	2;2	2	8	8	2	5	5	5	5	5	5	6	6	6	5	5	5	5	4	6	5	5	5	5	5	5	5	5	5	5	5	5	5	6	5	5	6	6	5	5	5	4	4	4	4	5	4
tr|A0A060Z2K7|A0A060Z2K7_ONCMY A2M domain-containing protein OS=Oncorhynchus mykiss OX=8022 GN=GSONMT00060331001 PE=4 SV=1	7	5	5	1	7	5	5	3	3	2	0	0	3	5	2	3	1	2	1	2	3	1	2	4	4	2	2	2	3	2	2	2	3	3	4	4	4	2	2	3	3	2	3	1	1	1	1	2	1
tr|A0A060Z324|A0A060Z324_ONCMY Peptidase S1 domain-containing protein (Fragment) OS=Oncorhynchus mykiss OX=8022 GN=GSONMT00000635001 PE=4 SV=1	2	2	2	1	2	2	2	0	0	0	0	0	0	0	0	0	0	0	0	0	0	0	0	0	0	0	0	0	1	1	1	0	0	0	1	0	0	0	0	0	1	0	0	0	0	0	0	0	0
tr|A0A060Z3J5|A0A060Z3J5_ONCMY Ig-like domain-containing protein OS=Oncorhynchus mykiss OX=8022 GN=GSONMT00035726001 PE=4 SV=1;tr|A0A060YQP0|A0A060YQP0_ONCMY Ig-like domain-containing protein OS=Oncorhynchus mykiss OX=8022 GN=GSONMT00015840001 PE=4 SV=1	2;1	2;1	2;1	2	2	2	2	2	2	2	2	2	2	2	2	2	2	2	2	2	1	2	2	1	2	2	2	2	2	2	2	2	2	2	2	2	2	2	2	2	2	2	1	0	1	0	2	2	2
tr|A0A060Z3N3|A0A060Z3N3_ONCMY Ig-like domain-containing protein OS=Oncorhynchus mykiss OX=8022 GN=GSONMT00039737001 PE=4 SV=1	2	2	2	1	2	2	2	0	0	0	0	0	0	0	0	0	0	0	0	0	0	0	0	0	0	0	0	0	0	0	0	0	0	0	2	0	1	0	0	0	0	0	0	0	0	0	0	0	1
tr|A0A060Z3P7|A0A060Z3P7_ONCMY Uncharacterized protein (Fragment) OS=Oncorhynchus mykiss OX=8022 GN=GSONMT00041248001 PE=4 SV=1	2	2	2	1	2	2	2	0	1	0	0	0	0	0	1	0	1	0	1	0	1	1	0	0	1	0	0	0	0	0	0	0	0	0	1	0	0	0	0	0	0	0	0	0	0	0	0	0	0
tr|A0A060Z3Q6|A0A060Z3Q6_ONCMY C1q domain-containing protein (Fragment) OS=Oncorhynchus mykiss OX=8022 GN=GSONMT00037945001 PE=4 SV=1	5	5	5	1	5	5	5	0	0	0	0	0	0	1	1	1	1	1	1	1	0	0	3	1	4	1	1	1	0	0	0	1	1	1	1	1	1	1	1	1	0	0	0	0	1	1	0	0	0
tr|A0A060Z433|A0A060Z433_ONCMY F5/8 type C domain-containing protein OS=Oncorhynchus mykiss OX=8022 GN=GSONMT00037865001 PE=4 SV=1	2	2	2	1	2	2	2	0	0	0	0	0	0	0	0	0	0	0	0	0	0	0	0	0	0	0	0	0	0	0	0	0	0	0	2	1	2	0	0	0	0	0	0	0	0	0	0	0	0
tr|A0A060Z4W3|A0A060Z4W3_ONCMY Uncharacterized protein OS=Oncorhynchus mykiss OX=8022 GN=GSONMT00056261001 PE=4 SV=1	5	5	5	1	5	5	5	4	4	4	2	3	3	4	5	4	4	5	4	4	4	4	2	2	2	3	2	3	4	3	4	3	4	5	4	4	4	2	3	1	3	2	3	1	1	2	3	3	3
tr|A0A060Z585|A0A060Z585_ONCMY Uncharacterized protein OS=Oncorhynchus mykiss OX=8022 GN=GSONMT00007093001 PE=4 SV=1	3	3	3	1	3	3	3	1	1	2	1	1	1	1	0	0	0	0	0	0	0	0	0	0	0	0	0	0	0	0	0	0	0	0	0	0	0	0	0	0	0	0	0	0	0	0	0	0	0
tr|A0A060Z644|A0A060Z644_ONCMY Ig-like domain-containing protein OS=Oncorhynchus mykiss OX=8022 GN=GSONMT00006349001 PE=4 SV=1	3;1	3;1	3;1	2	3	3	3	2	2	2	1	1	1	0	0	0	1	1	1	0	0	0	0	0	0	0	0	1	2	2	1	0	0	0	1	1	2	1	1	1	0	0	0	0	0	0	0	0	0
tr|A0A060Z6M4|A0A060Z6M4_ONCMY A2M_N_2 domain-containing protein OS=Oncorhynchus mykiss OX=8022 GN=GSONMT00000011001 PE=4 SV=1	4	2	2	1	4	2	2	2	2	2	2	2	2	4	4	4	3	4	4	2	2	3	2	1	1	3	3	3	3	2	2	3	3	3	3	3	3	4	4	3	4	4	3	3	2	2	1	1	2
tr|A0A060Z6M5|A0A060Z6M5_ONCMY Thioredoxin domain-containing protein (Fragment) OS=Oncorhynchus mykiss OX=8022 GN=GSONMT00041410001 PE=4 SV=1;tr|Q9I886|Q9I886_ONCMY Natural killer cell enhancement factor OS=Oncorhynchus mykiss OX=8022 GN=Nkef PE=2 SV=1;tr|	3;3;2;2	2;2;1;1	2;2;1;1	4	3	2	2	1	0	1	0	0	0	0	0	0	0	1	1	0	0	0	0	0	0	2	2	3	0	1	1	3	2	2	0	0	0	1	1	2	1	1	1	0	0	0	0	0	0
tr|A0A060Z709|A0A060Z709_ONCMY Vitellogenin domain-containing protein (Fragment) OS=Oncorhynchus mykiss OX=8022 GN=GSONMT00003300001 PE=4 SV=1	8	8	8	1	8	8	8	4	1	5	0	0	1	0	0	0	0	1	1	1	1	2	1	1	1	2	2	1	0	0	0	0	0	0	2	2	2	0	0	0	1	1	1	0	1	2	0	0	2
tr|A0A060Z757|A0A060Z757_ONCMY DUF1081 domain-containing protein OS=Oncorhynchus mykiss OX=8022 GN=GSONMT00045585001 PE=4 SV=1	11	3	3	1	11	3	3	9	10	10	4	5	5	4	4	5	2	2	3	7	8	6	0	0	0	0	0	0	6	7	7	1	2	2	6	6	5	2	1	1	7	6	5	0	2	1	5	6	7
tr|A0A060Z7F0|A0A060Z7F0_ONCMY Uncharacterized protein OS=Oncorhynchus mykiss OX=8022 GN=GSONMT00033285001 PE=4 SV=1	2	2	2	1	2	2	2	0	1	0	0	0	0	0	0	0	0	0	0	0	0	0	0	0	0	0	0	0	0	0	0	0	0	0	1	1	0	0	0	0	0	0	0	0	0	0	0	0	0
tr|A0A060Z7M7|A0A060Z7M7_ONCMY Alpha-1,4 glucan phosphorylase (Fragment) OS=Oncorhynchus mykiss OX=8022 GN=GSONMT00013197001 PE=3 SV=1	4	2	2	1	4	2	2	0	0	0	1	1	0	0	0	0	0	0	0	0	0	0	1	0	1	0	1	0	0	1	1	2	2	2	0	0	0	0	0	0	0	0	0	0	0	0	0	0	0
tr|A0A060Z7V4|A0A060Z7V4_ONCMY Peptidase S1 domain-containing protein OS=Oncorhynchus mykiss OX=8022 GN=GSONMT00035165001 PE=4 SV=1	1	1	1	1	1	1	1	0	0	0	0	0	0	0	0	0	0	0	0	0	0	0	0	1	1	0	0	0	0	0	0	0	0	0	0	0	0	0	0	0	0	0	0	0	0	0	0	0	0
tr|A0A060Z8E3|A0A060Z8E3_ONCMY Uncharacterized protein OS=Oncorhynchus mykiss OX=8022 GN=GSONMT00053090001 PE=4 SV=1	1	1	1	1	1	1	1	1	1	1	1	1	1	1	1	1	1	1	1	1	1	1	1	1	0	1	1	1	1	1	1	1	1	1	1	1	1	1	1	1	1	1	1	1	1	1	1	1	1
tr|A0A060Z8F9|A0A060Z8F9_ONCMY TRANSKETOLASE_1 domain-containing protein OS=Oncorhynchus mykiss OX=8022 GN=GSONMT00023780001 PE=4 SV=1	4	4	4	1	4	4	4	0	0	0	1	0	0	0	0	0	0	0	1	0	0	0	2	1	1	2	2	2	0	0	0	1	1	1	0	0	0	2	2	1	0	0	0	0	0	1	0	0	0
tr|A0A060Z8J4|A0A060Z8J4_ONCMY Ig-like domain-containing protein OS=Oncorhynchus mykiss OX=8022 GN=GSONMT00009250001 PE=4 SV=1	5	1	1	1	5	1	1	3	3	2	2	2	2	2	3	3	1	2	2	0	0	0	1	1	1	2	2	2	2	2	2	1	1	1	2	2	2	1	2	1	2	2	2	0	1	1	1	1	0
tr|A0A060Z8X8|A0A060Z8X8_ONCMY Carboxylic ester hydrolase (Fragment) OS=Oncorhynchus mykiss OX=8022 GN=GSONMT00012967001 PE=3 SV=1	1	1	1	1	1	1	1	0	0	0	0	0	0	0	1	0	0	0	0	1	1	0	0	1	0	1	0	0	0	0	1	0	1	0	0	0	0	0	0	0	0	0	0	0	0	0	0	0	0
tr|A0A060Z9A9|A0A060Z9A9_ONCMY Ig-like domain-containing protein OS=Oncorhynchus mykiss OX=8022 GN=GSONMT00023182001 PE=4 SV=1	2	1	1	1	2	1	1	2	2	2	1	1	1	0	0	0	0	0	0	0	0	0	1	0	1	1	0	0	1	1	1	0	0	0	1	1	1	1	0	0	2	2	1	0	0	0	0	0	0
tr|A0A060Z9B8|A0A060Z9B8_ONCMY Uncharacterized protein OS=Oncorhynchus mykiss OX=8022 GN=GSONMT00012996001 PE=3 SV=1;tr|A0A060Z073|A0A060Z073_ONCMY Uncharacterized protein OS=Oncorhynchus mykiss OX=8022 GN=GSONMT00019768001 PE=3 SV=1	7;4;1	7;4;1	7;4;1	3	7	7	7	1	1	1	1	0	0	1	2	1	2	2	2	3	2	2	5	5	5	4	4	5	2	3	3	3	2	1	1	1	1	4	4	4	2	3	2	3	3	3	2	1	1
tr|A0A060Z9H8|A0A060Z9H8_ONCMY Phosphoglycerate mutase OS=Oncorhynchus mykiss OX=8022 GN=GSONMT00056501001 PE=3 SV=1	9	9	3	1	9	9	3	1	1	2	0	0	0	0	0	0	0	0	0	0	0	0	1	4	2	6	7	7	1	1	0	8	7	7	0	0	0	6	5	5	0	0	0	0	0	2	0	0	0
tr|A0A060Z9L6|A0A060Z9L6_ONCMY SH2 domain-containing protein OS=Oncorhynchus mykiss OX=8022 GN=GSONMT00022769001 PE=4 SV=1	2	2	2	1	2	2	2	0	0	0	0	0	0	0	0	0	0	0	0	0	0	0	0	0	0	0	1	2	0	0	0	0	0	0	0	0	0	0	1	0	0	0	0	0	0	0	0	0	0
tr|A0A060Z9P5|A0A060Z9P5_ONCMY Ig-like domain-containing protein OS=Oncorhynchus mykiss OX=8022 GN=GSONMT00060799001 PE=4 SV=1	3	3	3	1	3	3	3	1	2	2	1	0	1	1	0	1	3	3	3	0	0	0	1	1	1	1	1	1	1	3	2	0	0	1	2	2	2	2	1	1	0	0	0	0	1	0	0	1	0
tr|A0A060ZAC2|A0A060ZAC2_ONCMY Transketolase_C domain-containing protein OS=Oncorhynchus mykiss OX=8022 GN=GSONMT00048073001 PE=4 SV=1	4	4	4	1	4	4	4	0	0	0	0	0	0	1	1	1	2	1	0	1	1	0	1	1	2	1	3	3	0	0	0	2	1	1	0	0	1	1	2	1	1	1	0	0	1	0	0	0	1
tr|A0A060ZDQ0|A0A060ZDQ0_ONCMY Anaphylatoxin-like domain-containing protein (Fragment) OS=Oncorhynchus mykiss OX=8022 GN=GSONMT00059433001 PE=4 SV=1	36	12	10	1	36	12	10	13	14	12	14	16	15	19	19	20	15	16	17	19	18	20	24	23	25	23	26	26	16	16	15	21	18	20	21	22	22	16	15	16	16	18	18	19	20	17	18	16	18
tr|A0A060ZE00|A0A060ZE00_ONCMY Fibrinogen C-terminal domain-containing protein OS=Oncorhynchus mykiss OX=8022 GN=GSONMT00009520001 PE=4 SV=1	3	2	2	1	3	2	2	2	3	2	1	1	1	0	0	0	1	1	1	1	1	1	0	0	0	2	2	2	1	1	1	2	2	1	1	1	1	1	1	1	1	1	1	1	1	1	2	1	1
tr|A0A060ZE03|A0A060ZE03_ONCMY Kazal-like domain-containing protein (Fragment) OS=Oncorhynchus mykiss OX=8022 GN=GSONMT00059543001 PE=3 SV=1;tr|A0A060YFJ5|A0A060YFJ5_ONCMY Kazal-like domain-containing protein OS=Oncorhynchus mykiss OX=8022 GN=GSONMT0002954	3;3;3	3;3;3	3;3;3	3	3	3	3	0	0	0	0	0	0	0	0	0	0	0	0	0	0	0	0	0	0	0	0	0	0	0	0	0	0	0	1	2	2	0	0	0	0	0	0	0	0	0	0	0	0
tr|A0A060ZEB2|A0A060ZEB2_ONCMY Uncharacterized protein OS=Oncorhynchus mykiss OX=8022 GN=GSONMT00051481001 PE=4 SV=1;tr|A0A060X1N9|A0A060X1N9_ONCMY Uncharacterized protein OS=Oncorhynchus mykiss OX=8022 GN=GSONMT00059097001 PE=4 SV=1	2;2	2;2	2;2	2	2	2	2	0	0	0	0	0	0	0	0	0	0	0	0	0	0	0	0	0	0	0	0	0	0	0	0	0	0	0	0	0	0	0	0	0	0	0	0	0	0	0	0	0	0
tr|A0A060ZEQ3|A0A060ZEQ3_ONCMY Lipocln_cytosolic_FA-bd_dom domain-containing protein OS=Oncorhynchus mykiss OX=8022 GN=GSONMT00055665001 PE=4 SV=1	4	4	4	1	4	4	4	1	0	1	1	0	1	0	1	1	0	2	2	1	2	3	2	1	1	1	1	1	2	2	0	0	1	0	2	1	1	0	1	0	0	1	1	0	0	0	1	1	1
tr|A0A060ZFQ2|A0A060ZFQ2_ONCMY Uncharacterized protein (Fragment) OS=Oncorhynchus mykiss OX=8022 GN=GSONMT00063460001 PE=3 SV=1	2	2	2	1	2	2	2	0	0	0	0	0	0	0	0	0	0	0	0	0	0	0	0	0	0	2	2	1	0	0	0	1	0	1	0	0	0	2	1	2	0	0	0	0	0	0	0	0	0
tr|A0A060ZGA8|A0A060ZGA8_ONCMY TED_complement domain-containing protein OS=Oncorhynchus mykiss OX=8022 GN=GSONMT00013827001 PE=4 SV=1	2	2	2	1	2	2	2	0	0	0	0	0	0	0	0	0	0	0	0	0	0	1	1	1	1	0	0	0	0	0	0	0	0	0	0	0	0	0	0	0	0	0	0	0	0	0	0	0	0
tr|A0A060ZGE4|A0A060ZGE4_ONCMY TED_complement domain-containing protein (Fragment) OS=Oncorhynchus mykiss OX=8022 GN=GSONMT00010721001 PE=4 SV=1;tr|A0A060X346|A0A060X346_ONCMY A2M_recep domain-containing protein OS=Oncorhynchus mykiss OX=8022 GN=GSONMT0002	6;5	4;3	4;3	2	6	4	4	5	4	4	2	2	2	2	3	3	3	3	3	4	3	3	2	3	3	1	1	1	1	4	3	1	1	1	3	2	3	2	2	2	2	4	4	3	1	3	4	3	3
tr|A0A060ZHQ2|A0A060ZHQ2_ONCMY Tubulin alpha chain OS=Oncorhynchus mykiss OX=8022 GN=GSONMT00061608001 PE=3 SV=1	6;2	6;2	1;1	2	6	6	1	1	0	1	0	0	0	1	1	0	2	1	1	0	0	0	0	0	0	0	1	0	0	0	0	1	1	1	0	0	0	1	0	0	0	0	0	0	0	0	0	0	0
tr|A0A060ZSQ0|A0A060ZSQ0_ONCMY Uncharacterized protein (Fragment) OS=Oncorhynchus mykiss OX=8022 GN=GSONMT00016278001 PE=3 SV=1;tr|C1BF55|C1BF55_ONCMY Lysozyme g OS=Oncorhynchus mykiss OX=8022 GN=LYG PE=2 SV=1	1;1	1;1	1;1	2	1	1	1	0	0	0	0	0	0	0	0	0	1	1	1	0	0	0	0	0	0	0	0	0	0	0	0	0	0	0	0	0	0	0	0	0	0	0	0	0	0	0	0	0	0
tr|A0A060ZVC3|A0A060ZVC3_ONCMY Uncharacterized protein (Fragment) OS=Oncorhynchus mykiss OX=8022 GN=GSONMT00017102001 PE=4 SV=1	12	6	6	1	12	6	6	6	6	6	7	7	7	6	6	6	6	6	6	7	7	7	10	10	12	7	6	7	6	6	6	6	5	6	6	6	6	7	7	7	6	6	6	6	6	6	6	6	6
tr|A0A060ZVN9|A0A060ZVN9_ONCMY Uncharacterized protein (Fragment) OS=Oncorhynchus mykiss OX=8022 GN=GSONMT00050438001 PE=4 SV=1	3	3	3	1	3	3	3	3	2	1	0	0	0	1	1	1	2	1	1	1	0	0	0	0	1	0	0	0	0	0	1	1	1	1	1	1	1	0	0	0	1	1	0	0	0	0	1	2	1
tr|A0A061A2J1|A0A061A2J1_ONCMY Uncharacterized protein OS=Oncorhynchus mykiss OX=8022 GN=GSONMT00013177001 PE=4 SV=1	2	2	2	1	2	2	2	1	1	1	1	1	1	1	1	1	1	1	1	1	1	1	1	1	0	0	1	0	1	1	1	1	1	0	1	1	1	0	1	1	1	1	1	1	1	1	1	1	1
tr|A0A061A754|A0A061A754_ONCMY Ig-like domain-containing protein (Fragment) OS=Oncorhynchus mykiss OX=8022 GN=GSONMT00005471001 PE=4 SV=1;tr|A0A060XAL4|A0A060XAL4_ONCMY Ig-like domain-containing protein OS=Oncorhynchus mykiss OX=8022 GN=GSONMT00000228001 P	5;5	3;3	1;1	2	5	3	1	3	3	3	4	4	3	1	2	1	0	0	2	0	1	2	0	0	0	1	2	4	2	4	4	1	0	0	2	2	2	3	2	4	4	3	4	4	2	1	2	2	2
tr|A0A061A7A8|A0A061A7A8_ONCMY Uncharacterized protein (Fragment) OS=Oncorhynchus mykiss OX=8022 GN=GSONMT00026795001 PE=4 SV=1	4	4	4	1	4	4	4	2	2	1	2	2	2	3	3	4	3	2	3	2	3	3	0	0	0	2	2	2	3	2	3	3	3	3	2	2	2	3	2	2	3	2	3	2	1	2	2	2	2
tr|A0A061A7B4|A0A061A7B4_ONCMY Uncharacterized protein (Fragment) OS=Oncorhynchus mykiss OX=8022 GN=GSONMT00021275001 PE=4 SV=1	5	5	5	1	5	5	5	2	2	2	2	2	2	2	2	2	2	2	2	2	2	2	4	4	4	2	2	2	2	2	2	2	2	2	2	2	2	2	2	2	2	2	2	2	2	2	2	2	2
tr|A0A061A7K5|A0A061A7K5_ONCMY Uncharacterized protein (Fragment) OS=Oncorhynchus mykiss OX=8022 GN=GSONMT00035390001 PE=4 SV=1	8	1	1	1	8	1	1	1	3	2	1	1	1	3	3	6	2	1	3	2	4	3	2	0	2	2	3	3	1	1	2	2	1	1	2	3	3	1	1	2	0	0	1	0	0	0	2	2	2
tr|A0A061A7Q3|A0A061A7Q3_ONCMY Ig-like domain-containing protein OS=Oncorhynchus mykiss OX=8022 GN=GSONMT00032826001 PE=4 SV=1	6	6	1	1	6	6	1	3	3	2	2	2	1	3	3	4	2	2	2	1	1	0	1	1	1	2	2	2	2	2	2	2	2	2	2	1	2	2	3	2	1	2	2	1	2	2	2	1	1
tr|A0A061A7S7|A0A061A7S7_ONCMY Peptidase S1 domain-containing protein (Fragment) OS=Oncorhynchus mykiss OX=8022 GN=GSONMT00018815001 PE=4 SV=1	6	2	2	1	6	2	2	3	3	3	2	3	1	2	3	2	4	4	3	2	4	3	2	1	2	2	3	2	4	3	3	3	4	3	3	4	5	1	2	1	3	3	3	3	2	3	2	3	2
tr|A0A061A8T0|A0A061A8T0_ONCMY Peptidase S1 domain-containing protein OS=Oncorhynchus mykiss OX=8022 GN=GSONMT00029541001 PE=4 SV=1	8	8	1	1	8	8	1	1	1	1	0	1	0	1	2	2	2	2	1	1	2	2	3	3	3	4	6	3	2	2	1	1	3	3	3	2	4	1	2	1	1	1	1	1	2	2	1	3	1
tr|A0A061ACS1|A0A061ACS1_ONCMY Ig-like domain-containing protein OS=Oncorhynchus mykiss OX=8022 GN=GSONMT00011392001 PE=4 SV=1	2	1	1	1	2	1	1	2	2	2	1	1	2	1	1	2	2	2	1	1	1	1	1	1	1	1	1	1	1	2	2	0	1	1	2	2	2	1	2	0	1	0	1	0	0	0	0	1	0
tr|A0A061AD33|A0A061AD33_ONCMY Uncharacterized protein (Fragment) OS=Oncorhynchus mykiss OX=8022 GN=GSONMT00025273001 PE=4 SV=1	9	9	9	1	9	9	9	3	4	4	2	3	2	2	4	3	3	4	2	4	2	3	3	4	2	6	6	6	2	4	2	5	4	4	4	5	4	6	6	8	4	4	3	5	5	5	2	1	4
tr|A0A061ADL0|A0A061ADL0_ONCMY 2-phospho-D-glycerate hydro-lyase OS=Oncorhynchus mykiss OX=8022 GN=GSONMT00040319001 PE=3 SV=1	12	1	1	1	12	1	1	4	3	3	1	1	2	1	1	1	1	0	0	0	1	1	3	3	5	9	10	10	2	2	1	9	9	9	1	1	1	6	6	5	1	1	0	6	6	7	0	0	1
tr|A0A061ADP8|A0A061ADP8_ONCMY Ig-like domain-containing protein OS=Oncorhynchus mykiss OX=8022 GN=GSONMT00014723001 PE=4 SV=1;tr|A0A060WZL5|A0A060WZL5_ONCMY Ig-like domain-containing protein OS=Oncorhynchus mykiss OX=8022 GN=GSONMT00053001001 PE=4 SV=1	1;1	1;1	1;1	2	1	1	1	1	1	0	0	0	0	1	1	1	1	1	1	1	1	1	1	1	1	1	1	1	1	1	1	1	1	1	0	1	0	1	1	1	0	0	0	0	0	0	1	0	1
tr|A0A061ADR8|A0A061ADR8_ONCMY IGv domain-containing protein OS=Oncorhynchus mykiss OX=8022 GN=GSONMT00014954001 PE=4 SV=1	2	2	2	1	2	2	2	0	0	0	0	0	0	0	0	0	0	0	0	0	0	0	0	0	0	1	0	0	2	1	0	0	1	0	0	0	0	0	0	0	0	0	0	0	0	0	0	0	0
tr|A0A068QLT0|A0A068QLT0_ONCMY Selenoprotein Pb OS=Oncorhynchus mykiss OX=8022 GN=SelPb PE=2 SV=1;tr|A0A060VXJ3|A0A060VXJ3_ONCMY SelP_N domain-containing protein OS=Oncorhynchus mykiss OX=8022 GN=GSONMT00080385001 PE=4 SV=1	2;1	2;1	2;1	2	2	2	2	1	1	0	0	0	0	1	0	1	0	0	0	1	0	0	0	0	0	0	0	0	0	0	0	0	0	0	0	0	1	0	1	0	0	0	0	0	0	0	0	0	0
tr|A0A088GKX2|A0A088GKX2_9LACT Family S9 peptidase OS=Weissella ceti OX=759620 GN=WS74_1183 PE=4 SV=1	1	1	1	1	1	1	1	0	0	0	0	0	0	0	0	0	0	1	1	0	0	0	0	0	0	0	0	0	0	0	0	0	0	0	0	0	0	0	0	0	0	0	0	0	0	0	0	0	0
tr|A0A292GC12|A0A292GC12_ONCMY Phosvitin OS=Oncorhynchus mykiss OX=8022 GN=VtgC PE=2 SV=1;tr|A0A060WCP6|A0A060WCP6_ONCMY Phosvitin OS=Oncorhynchus mykiss OX=8022 GN=GSONMT00066913001 PE=4 SV=1	7;6	7;6	7;6	2	7	7	7	0	0	0	0	0	0	3	2	1	0	0	0	0	0	0	0	0	0	0	0	0	2	0	3	0	0	0	6	5	3	0	0	0	0	0	0	0	0	0	0	0	0
tr|A0A316WSK7|A0A316WSK7_9FLAO DNA methylase OS=Chryseobacterium viscerum OX=1037377 GN=C1634_006210 PE=4 SV=1	2	2	2	1	2	2	2	0	0	0	0	0	0	0	0	0	0	0	0	0	0	0	1	1	0	0	0	0	0	0	0	0	0	0	0	0	0	1	0	0	0	0	0	0	0	0	0	0	0
tr|A0A316X7U3|A0A316X7U3_9FLAO Peptidase M1 OS=Chryseobacterium oncorhynchi OX=741074 GN=C1638_001950 PE=4 SV=1	1	1	1	1	1	1	1	0	0	0	0	0	0	0	0	0	0	0	0	0	0	0	0	1	1	0	0	0	0	0	0	0	0	0	0	0	0	0	0	0	0	0	0	0	0	0	0	0	0
tr|A0A411MES9|A0A411MES9_9PSED RNA polymerase sigma-54 factor OS=Pseudomonas sp. SNU WT1 OX=2518644 GN=EXN22_06440 PE=3 SV=1	1	1	1	1	1	1	1	1	0	1	1	1	1	0	1	1	1	1	1	1	0	0	1	1	1	1	0	1	0	1	1	1	1	1	1	1	0	1	0	0	1	1	1	0	0	0	0	0	0
tr|A0A4P7J1A6|A0A4P7J1A6_9ENTR Phage tail protein I OS=Citrobacter sp. SNU WT2 OX=2562449 GN=E4Z61_09525 PE=4 SV=1	1	1	1	1	1	1	1	0	0	0	0	0	0	1	0	1	1	0	1	1	1	1	0	0	0	0	0	0	1	1	1	0	0	0	0	0	0	0	0	0	0	0	0	1	1	1	1	0	1
tr|A0A4P7J2Z7|A0A4P7J2Z7_9ENTR RNA polymerase-associated protein RapA OS=Citrobacter sp. SNU WT2 OX=2562449 GN=rapA PE=3 SV=1	1	1	1	1	1	1	1	1	1	1	0	0	0	0	1	0	1	1	1	0	1	0	0	0	0	0	0	0	1	0	0	1	0	1	0	0	0	0	0	0	0	0	0	0	0	0	0	0	0
tr|A0A4Y1JSB8|A0A4Y1JSB8_ONCMY Carbonic anhydrase OS=Oncorhynchus mykiss OX=8022 PE=2 SV=1;tr|Q6R4A2|Q6R4A2_ONCMY Carbonic anhydrase OS=Oncorhynchus mykiss OX=8022 GN=CA2 PE=2 SV=1;tr|Q68YC2|Q68YC2_ONCMY Carbonic anhydrase OS=Oncorhynchus mykiss OX=8022 GN	3;3;3	2;2;2	2;2;2	3	3	2	2	0	1	1	0	0	0	1	1	1	0	0	1	0	0	0	0	0	0	0	0	0	0	0	1	0	0	0	0	0	0	0	0	0	0	0	0	0	0	0	0	0	0
tr|A0A4Y6RIE4|A0A4Y6RIE4_9BURK D-aminoacyl-tRNA deacylase OS=Janthinobacterium sp. SNU WT3 OX=2590869 GN=dtd PE=3 SV=1	1	1	1	1	1	1	1	0	0	0	1	1	1	1	1	1	0	0	1	0	0	0	0	0	0	0	0	0	0	0	0	1	0	0	0	1	1	0	0	0	0	0	0	0	0	0	1	1	1
tr|A0A4Y6RJ34|A0A4Y6RJ34_9BURK ABC transporter ATP-binding protein OS=Janthinobacterium sp. SNU WT3 OX=2590869 GN=FJQ89_22965 PE=4 SV=1	1	1	1	1	1	1	1	0	0	0	0	0	0	0	0	0	0	0	0	0	0	0	0	0	0	0	0	0	0	0	0	1	0	0	0	0	0	0	0	0	0	0	0	0	0	0	0	0	0
tr|A0A516P1X2|A0A516P1X2_9FLAO Murein L,D-transpeptidase catalytic domain family protein OS=Chryseobacterium sp. SNU WT5 OX=2594269 GN=FNJ88_06070 PE=4 SV=1	1	1	1	1	1	1	1	0	0	0	0	0	0	0	1	0	0	1	0	0	0	0	0	0	0	0	0	1	0	0	0	0	0	0	0	0	0	0	0	1	0	0	0	0	0	0	0	1	0
tr|A0A650ATX5|A0A650ATX5_ONCMY Beta-tubulin OS=Oncorhynchus mykiss OX=8022 PE=2 SV=1;tr|A0A060XV78|A0A060XV78_ONCMY Tubulin beta chain OS=Oncorhynchus mykiss OX=8022 GN=GSONMT00013009001 PE=3 SV=1;tr|A0A060X6Y9|A0A060X6Y9_ONCMY Tubulin beta chain OS=Oncorh	6;6;6;6;6;6;5;5;4;3;3;3;3;3;2;2;2	3;3;3;3;3;3;2;2;1;2;2;2;2;0;1;1;0	3;3;3;3;3;3;2;2;1;2;2;2;2;0;1;1;0	17	6	3	3	2	2	2	2	2	2	2	2	2	1	1	1	1	1	1	0	0	0	3	3	2	1	2	0	2	1	1	0	0	0	1	2	2	2	0	0	0	0	0	0	0	1
tr|A0A7D5UP70|A0A7D5UP70_ONCMY Peptidyl-prolyl cis-trans isomerase OS=Oncorhynchus mykiss OX=8022 GN=CypA PE=2 SV=1;tr|A0A060Y0S7|A0A060Y0S7_ONCMY Peptidyl-prolyl cis-trans isomerase OS=Oncorhynchus mykiss OX=8022 GN=GSONMT00021472001 PE=3 SV=1	5;5	5;5	3;3	2	5	5	3	0	0	0	0	0	0	0	0	0	0	1	2	0	0	0	1	1	1	1	2	0	0	0	0	0	0	0	0	0	0	1	1	1	0	0	0	0	0	0	0	0	0
tr|A0JG02|A0JG02_ONCMY Immonoglobulin light chain (Fragment) OS=Oncorhynchus mykiss OX=8022 GN=IGL2V3C31-2 PE=4 SV=1	2	2	2	1	2	2	2	2	1	2	2	2	2	2	2	2	2	2	2	1	1	1	1	0	0	2	2	2	2	2	2	2	2	2	2	2	1	2	1	2	1	2	2	0	0	1	2	2	2
tr|A5H0J9|A5H0J9_ONCMY Serum albumin (Fragment) OS=Oncorhynchus mykiss OX=8022 PE=2 SV=1	18	18	18	1	18	18	18	11	11	10	8	9	9	9	10	8	9	9	10	8	9	9	7	8	7	8	7	7	9	9	9	7	6	7	11	11	11	6	10	8	10	9	10	7	8	8	10	9	9
tr|A5JUT5|A5JUT5_ONCMY Sex hormone-binding globulin beta form OS=Oncorhynchus mykiss OX=8022 GN=SHBGb PE=2 SV=1;tr|A0A060WZN4|A0A060WZN4_ONCMY Uncharacterized protein OS=Oncorhynchus mykiss OX=8022 GN=GSONMT00045295001 PE=4 SV=1	10;10	10;10	10;10	2	10	10	10	1	1	1	3	2	2	3	5	3	1	2	1	1	4	4	1	2	1	1	1	2	1	2	1	1	1	1	6	5	6	2	3	3	3	1	3	1	2	2	1	1	2
tr|A7XZM2|A7XZM2_ONCMY Fast myosin light chain 2 OS=Oncorhynchus mykiss OX=8022 PE=2 SV=1	4	4	3	1	4	4	3	0	0	0	0	0	0	0	0	0	0	0	0	0	0	0	0	0	0	4	3	3	0	0	0	0	1	0	0	0	0	0	0	0	0	0	0	0	0	0	0	0	0
tr|A8YQG5|A8YQG5_ONCMY Properdin P factor 3 OS=Oncorhynchus mykiss OX=8022 GN=pfc3 PE=2 SV=1;tr|A0A060XK51|A0A060XK51_ONCMY Uncharacterized protein OS=Oncorhynchus mykiss OX=8022 GN=GSONMT00037471001 PE=4 SV=1	7;5	3;3	3;3	2	7	3	3	3	4	3	3	3	2	4	3	2	3	2	4	3	3	3	0	1	0	2	2	2	3	3	3	2	3	3	2	4	3	3	1	1	3	3	3	3	1	1	2	4	2
tr|B2DBF2|B2DBF2_ONCMY Troponin I OS=Oncorhynchus mykiss OX=8022 PE=2 SV=1;tr|A0A060W984|A0A060W984_ONCMY Uncharacterized protein OS=Oncorhynchus mykiss OX=8022 GN=GSONMT00065897001 PE=4 SV=1;tr|A0A060X3F7|A0A060X3F7_ONCMY Uncharacterized protein OS=Oncorh	2;2;1;1	2;2;1;1	2;2;1;1	4	2	2	2	0	0	0	0	0	0	0	0	0	0	0	0	0	0	0	0	0	0	2	1	1	0	0	0	1	1	1	0	0	0	0	0	0	0	0	0	0	0	0	0	0	0
tr|B5AXN8|B5AXN8_ONCMY Chitinase OS=Oncorhynchus mykiss OX=8022 GN=GSONMT00007962001 PE=2 SV=1;tr|Q5NKG0|Q5NKG0_ONCMY Chitinase OS=Oncorhynchus mykiss OX=8022 GN=chi PE=2 SV=1	8;7	8;7	8;7	2	8	8	8	6	6	6	5	4	4	7	6	5	6	7	6	5	7	5	5	5	5	6	7	6	6	6	6	5	5	5	4	5	4	5	5	6	6	6	5	5	5	2	3	2	4
tr|B5KWB3|B5KWB3_ONCMY Mannan-binding lectin H3 OS=Oncorhynchus mykiss OX=8022 PE=2 SV=1	8	2	2	1	8	2	2	3	3	3	4	4	4	5	5	5	4	4	4	4	3	5	6	6	6	3	4	4	4	4	4	4	4	4	4	5	4	4	5	5	4	4	4	3	3	3	3	3	3
tr|C0KIP4|C0KIP4_ONCMY C type lectin receptor B OS=Oncorhynchus mykiss OX=8022 PE=2 SV=1	14;5	14;5	14;5	2	14	14	14	6	5	5	5	6	4	5	5	5	6	7	7	8	8	8	9	11	12	8	10	9	7	7	6	7	6	6	7	7	7	6	6	6	5	6	6	6	6	5	6	6	6
tr|C1BEH9|C1BEH9_ONCMY Histone H2A OS=Oncorhynchus mykiss OX=8022 GN=H2A PE=2 SV=1;sp|P02264|H2A_ONCMY Histone H2A OS=Oncorhynchus mykiss OX=8022 PE=1 SV=2;tr|A0A060VUR1|A0A060VUR1_ONCMY Histone H2A OS=Oncorhynchus mykiss OX=8022 GN=GSONMT00078166001 PE=3	2;2;2;1;1;1;1	2;2;2;1;1;1;1	1;1;1;1;0;0;0	7	2	2	1	2	2	2	2	1	2	2	2	2	2	2	2	1	2	0	0	0	0	1	1	1	2	2	2	1	0	0	0	1	1	1	1	1	0	0	0	0	0	1	0	0	0
tr|C1BEM6|C1BEM6_ONCMY Hemoglobin subunit beta OS=Oncorhynchus mykiss OX=8022 GN=HBB PE=2 SV=1	18	4	1	1	18	4	1	14	14	15	11	11	11	12	13	13	14	13	14	12	12	12	6	8	8	10	11	10	11	12	11	11	12	11	11	11	11	11	10	10	13	13	14	11	11	10	7	9	9
tr|C1BEX3|C1BEX3_ONCMY Hemoglobin subunit beta-4 OS=Oncorhynchus mykiss OX=8022 GN=HBB4 PE=2 SV=1;tr|C1BG64|C1BG64_ONCMY Hemoglobin subunit beta-4 OS=Oncorhynchus mykiss OX=8022 GN=HBB4 PE=2 SV=1;tr|C1BFL6|C1BFL6_ONCMY Hemoglobin subunit beta-4 OS=Oncorhyn	19;16;13;13	19;16;13;13	3;0;0;3	4	19	19	3	14	13	13	11	11	11	12	13	13	15	13	13	11	11	11	8	8	8	10	11	10	11	11	10	11	12	11	11	11	10	11	10	10	12	12	13	11	11	10	7	9	9
tr|C1BEZ5|C1BEZ5_ONCMY ABRA C-terminal-like protein OS=Oncorhynchus mykiss OX=8022 GN=CF115 PE=2 SV=1	1	1	1	1	1	1	1	0	0	0	0	0	0	0	0	0	0	0	0	0	0	0	0	0	0	1	1	1	0	0	0	0	0	0	0	0	0	0	0	0	0	0	0	0	0	0	0	0	0
tr|C1BF12|C1BF12_ONCMY Proteasome activator complex subunit 2 OS=Oncorhynchus mykiss OX=8022 GN=PSME2 PE=2 SV=1;tr|A0A060WJ19|A0A060WJ19_ONCMY Uncharacterized protein OS=Oncorhynchus mykiss OX=8022 GN=GSONMT00048586001 PE=3 SV=1;tr|C1BI70|C1BI70_ONCMY Prot	3;3;3;2;1;1;1;1;1	3;3;3;2;1;1;1;1;1	3;3;3;2;1;1;1;1;1	9	3	3	3	0	0	0	0	0	0	0	0	0	0	0	0	0	0	0	0	0	0	2	1	1	0	0	0	1	0	1	0	0	0	1	1	0	0	0	0	0	0	0	0	0	0
tr|C1BF66|C1BF66_ONCMY Cofilin-2 OS=Oncorhynchus mykiss OX=8022 GN=COF2 PE=2 SV=1	7	7	1	1	7	7	1	0	1	2	1	2	2	0	1	1	1	2	1	2	0	2	2	2	2	6	6	6	0	1	1	4	4	3	0	0	1	6	4	3	0	0	0	0	0	1	1	0	1
tr|C1BFB5|C1BFB5_ONCMY Histone H1 OS=Oncorhynchus mykiss OX=8022 GN=H1 PE=2 SV=1;tr|A0A060Y6A8|A0A060Y6A8_ONCMY H15 domain-containing protein OS=Oncorhynchus mykiss OX=8022 GN=GSONMT00055804001 PE=3 SV=1;tr|C1BG98|C1BG98_ONCMY Histone H1 OS=Oncorhynchus my	4;4;3;3;3;3	3;3;2;2;2;2	3;3;2;2;2;2	6	4	3	3	1	1	2	0	0	0	0	0	0	1	3	2	0	0	0	0	0	0	0	0	0	0	0	0	0	0	0	0	0	0	0	0	0	0	0	0	0	0	0	0	0	0
tr|C1BFD1|C1BFD1_ONCMY Acidic leucine-rich nuclear phosphoprotein 32 family member B OS=Oncorhynchus mykiss OX=8022 GN=AN32B PE=2 SV=1;tr|C1BG95|C1BG95_ONCMY Acidic leucine-rich nuclear phosphoprotein 32 family member B OS=Oncorhynchus mykiss OX=8022 GN=AN	2;2;2;2;2;2;2;1;1	2;2;2;2;2;2;2;1;1	2;2;2;2;2;2;2;1;1	9	2	2	2	0	0	0	0	0	0	0	0	0	0	0	0	0	0	0	0	0	0	0	0	0	0	0	0	0	0	0	0	0	0	0	0	0	0	0	0	0	0	0	0	0	0
tr|C1BFF6|C1BFF6_ONCMY Thioredoxin OS=Oncorhynchus mykiss OX=8022 GN=THIO PE=2 SV=1	1	1	1	1	1	1	1	0	0	0	0	0	0	0	0	0	0	0	0	0	0	0	0	0	0	0	0	1	0	0	0	0	1	0	0	0	0	0	1	0	0	0	0	0	0	0	0	0	0
tr|C1BFV2|C1BFV2_ONCMY Cofilin-2 OS=Oncorhynchus mykiss OX=8022 GN=COF2 PE=2 SV=1	3	2	1	1	3	2	1	0	1	0	0	0	0	0	0	0	1	0	0	0	0	0	1	0	1	2	1	0	0	0	0	0	0	1	0	0	0	1	2	1	0	0	0	0	0	0	0	0	0
tr|C1BG05|C1BG05_ONCMY Ubiquitin OS=Oncorhynchus mykiss OX=8022 GN=UBIQ PE=2 SV=1;tr|Q9PT09|Q9PT09_ONCMY 60S ribosomal protein L40 OS=Oncorhynchus mykiss OX=8022 GN=GSONMT00081275001 PE=1 SV=1;tr|C1BGP1|C1BGP1_ONCMY 60S ribosomal protein L40 OS=Oncorhynchu	2;2;2;2;2;2;2;2;2;2;2;1;1	2;2;2;2;2;2;2;2;2;2;2;1;1	2;2;2;2;2;2;2;2;2;2;2;1;1	13	2	2	2	0	1	0	1	1	0	0	0	0	1	1	1	0	0	0	0	0	0	1	0	1	0	0	1	1	0	1	0	0	0	1	1	1	0	0	0	0	0	0	0	0	0
tr|C1BG12|C1BG12_ONCMY Leukocyte cell-derived chemotaxin 2 OS=Oncorhynchus mykiss OX=8022 GN=LECT2 PE=2 SV=1;tr|Q9DFJ1|Q9DFJ1_ONCMY Chemotaxin (Fragment) OS=Oncorhynchus mykiss OX=8022 GN=GSONMT00065856001 PE=2 SV=1;tr|Q8JJ67|Q8JJ67_ONCMY LECT2 neutrophil	12;10;9;2	12;10;9;2	12;10;9;2	4	12	12	12	0	0	0	0	0	0	0	0	1	2	1	2	4	3	3	9	8	10	5	6	5	1	0	0	5	5	5	1	2	1	4	6	6	2	1	1	3	4	3	1	1	0
tr|C1BG28|C1BG28_ONCMY Glutathione-dependent dehydroascorbate reductase OS=Oncorhynchus mykiss OX=8022 GN=GSTO1 PE=2 SV=1;tr|C1BFQ9|C1BFQ9_ONCMY Glutathione-dependent dehydroascorbate reductase OS=Oncorhynchus mykiss OX=8022 GN=GSTO1 PE=2 SV=1;tr|C1BFM5|C1	5;5;5;4	5;5;5;4	5;5;5;4	4	5	5	5	0	0	0	0	0	0	0	0	0	0	0	0	0	0	0	0	0	0	1	1	1	0	0	0	0	0	0	0	0	0	0	0	0	1	1	0	0	0	0	0	0	0
tr|C1BG49|C1BG49_ONCMY Hemoglobin subunit alpha-4 OS=Oncorhynchus mykiss OX=8022 GN=HBA4 PE=2 SV=1;tr|C1BEX7|C1BEX7_ONCMY Hemoglobin subunit alpha-4 OS=Oncorhynchus mykiss OX=8022 GN=HBA4 PE=2 SV=1	12;11	2;2	2;2	2	12	2	2	7	8	8	6	7	7	7	7	7	9	8	8	7	7	7	4	3	4	4	5	4	8	7	7	5	5	4	6	6	6	6	5	6	7	7	8	7	6	5	4	5	5
tr|C1BG67|C1BG67_ONCMY Hemoglobin subunit beta-4 OS=Oncorhynchus mykiss OX=8022 GN=HBB4 PE=2 SV=1	18	1	1	1	18	1	1	14	14	15	11	11	11	12	13	13	14	13	14	12	12	12	6	8	8	9	10	10	11	12	11	11	12	11	10	10	11	11	10	10	13	13	14	11	11	10	7	8	9
tr|C1BGC6|C1BGC6_ONCMY Flavin reductase OS=Oncorhynchus mykiss OX=8022 GN=BLVRB PE=2 SV=1;tr|C1BG96|C1BG96_ONCMY Flavin reductase OS=Oncorhynchus mykiss OX=8022 GN=BLVRB PE=2 SV=1;tr|C1BFS0|C1BFS0_ONCMY Flavin reductase OS=Oncorhynchus mykiss OX=8022 GN=BL	6;6;6;6;5;4	6;6;6;6;5;4	6;6;6;6;5;4	6	6	6	6	2	1	1	0	0	0	1	0	0	2	3	3	1	1	0	0	0	0	0	0	0	0	0	0	0	0	0	0	0	0	0	0	0	1	0	1	0	0	0	0	0	0
tr|C1BGF0|C1BGF0_ONCMY Acyl-CoA-binding protein OS=Oncorhynchus mykiss OX=8022 GN=ACBP PE=2 SV=1;tr|C1BHF1|C1BHF1_ONCMY Acyl-CoA-binding protein OS=Oncorhynchus mykiss OX=8022 GN=ACBP PE=2 SV=1	3;2	3;2	3;2	2	3	3	3	0	0	0	0	0	0	0	0	0	0	0	0	0	0	0	2	2	2	1	1	1	0	0	0	0	0	0	0	0	0	1	0	0	0	1	0	0	0	0	0	0	0
tr|C1BGI7|C1BGI7_ONCMY Hemoglobin subunit alpha-4 OS=Oncorhynchus mykiss OX=8022 GN=HBA4 PE=2 SV=1;tr|C1BF11|C1BF11_ONCMY Hemoglobin subunit alpha-4 OS=Oncorhynchus mykiss OX=8022 GN=HBA4 PE=2 SV=1;tr|C1BEW1|C1BEW1_ONCMY Hemoglobin subunit alpha-4 OS=Oncor	9;9;8	3;3;3	3;3;3	3	9	3	3	8	8	8	4	5	4	6	7	6	7	8	8	7	7	7	4	2	4	5	4	3	7	7	7	7	6	7	3	2	2	6	7	5	6	7	7	7	6	6	4	3	4
tr|C1BGN2|C1BGN2_ONCMY Actin-related protein 2/3 complex subunit 3 OS=Oncorhynchus mykiss OX=8022 GN=ARPC3 PE=2 SV=1;tr|C1BFF5|C1BFF5_ONCMY Actin-related protein 2/3 complex subunit 3 OS=Oncorhynchus mykiss OX=8022 GN=ARPC3 PE=2 SV=1;tr|A0A060WNA4|A0A060WN	2;2;2	2;2;2	2;2;2	3	2	2	2	0	0	0	0	0	0	0	0	0	0	0	0	0	0	0	0	0	0	2	1	1	0	0	0	0	0	0	0	0	0	0	0	0	0	0	0	0	0	0	0	0	0
tr|C1BGU6|C1BGU6_ONCMY Lysozyme g OS=Oncorhynchus mykiss OX=8022 GN=LYG PE=2 SV=1;tr|C1BHT6|C1BHT6_ONCMY Lysozyme g OS=Oncorhynchus mykiss OX=8022 GN=LYG PE=2 SV=1;tr|C1BHK0|C1BHK0_ONCMY Lysozyme g OS=Oncorhynchus mykiss OX=8022 GN=LYG PE=2 SV=1;tr|A0A060V	7;7;7;6	7;7;7;6	7;7;7;6	4	7	7	7	0	0	0	0	0	0	0	0	0	0	1	0	0	0	0	6	5	6	2	3	1	1	0	0	3	4	1	0	0	0	2	3	1	1	0	1	0	0	0	0	0	0
tr|C1BGZ3|C1BGZ3_ONCMY Actin-related protein 2/3 complex subunit 4 OS=Oncorhynchus mykiss OX=8022 GN=ARPC4 PE=2 SV=1;tr|A0A060XPC4|A0A060XPC4_ONCMY Uncharacterized protein OS=Oncorhynchus mykiss OX=8022 GN=GSONMT00007708001 PE=3 SV=1	1;1	1;1	1;1	2	1	1	1	0	0	0	0	0	0	0	0	0	0	0	0	0	0	0	0	1	1	1	1	1	0	0	0	1	1	1	0	0	0	1	1	1	0	0	0	0	0	0	0	0	0
tr|C1BGZ7|C1BGZ7_ONCMY 40S ribosomal protein S16 OS=Oncorhynchus mykiss OX=8022 GN=RS16 PE=2 SV=1;tr|C1BGA3|C1BGA3_ONCMY 40S ribosomal protein S16 OS=Oncorhynchus mykiss OX=8022 GN=RS16 PE=2 SV=1;tr|A0A060XII7|A0A060XII7_ONCMY Uncharacterized protein OS=On	2;2;1	2;2;1	2;2;1	3	2	2	2	0	0	0	0	0	0	0	0	0	0	0	0	0	0	0	0	0	0	0	0	0	0	0	0	0	0	0	0	0	0	0	0	0	0	0	0	0	0	0	0	0	0
tr|C1BH46|C1BH46_ONCMY Fatty acid-binding protein, heart OS=Oncorhynchus mykiss OX=8022 GN=FABPH PE=2 SV=1;tr|A0A060Y484|A0A060Y484_ONCMY FABP domain-containing protein OS=Oncorhynchus mykiss OX=8022 GN=GSONMT00000920001 PE=3 SV=1	7;7	6;6	5;5	2	7	6	5	0	0	0	0	0	0	0	0	0	0	0	0	0	0	0	2	5	3	2	1	1	0	0	0	0	0	0	0	0	0	1	1	1	0	0	0	0	0	0	0	0	0
tr|C1BH52|C1BH52_ONCMY Heme-binding protein 2 OS=Oncorhynchus mykiss OX=8022 GN=HEBP2 PE=2 SV=1	7;1;1	7;1;1	7;1;1	3	7	7	7	4	4	4	3	4	4	5	4	5	3	4	4	5	4	5	0	1	1	2	3	2	4	4	4	4	3	4	6	5	5	4	4	4	4	4	5	5	3	3	5	5	5
tr|C1BH93|C1BH93_ONCMY S100-A1 OS=Oncorhynchus mykiss OX=8022 GN=S10A1 PE=2 SV=1;tr|C1BH45|C1BH45_ONCMY Protein S100 OS=Oncorhynchus mykiss OX=8022 GN=S10A1 PE=2 SV=1;tr|A0A060WZJ5|A0A060WZJ5_ONCMY Protein S100 OS=Oncorhynchus mykiss OX=8022 GN=GSONMT00036	1;1;1	1;1;1	1;1;1	3	1	1	1	0	1	1	0	0	0	1	1	1	1	1	0	0	0	0	0	0	0	1	1	1	1	0	0	1	1	1	1	1	1	1	1	1	1	0	0	0	0	0	0	0	0
tr|C1BHB8|C1BHB8_ONCMY Actin-related protein 2/3 complex subunit 4 OS=Oncorhynchus mykiss OX=8022 GN=ARPC4 PE=2 SV=1;tr|C1BFR6|C1BFR6_ONCMY Actin-related protein 2/3 complex subunit 4 OS=Oncorhynchus mykiss OX=8022 GN=ARPC4 PE=2 SV=1;tr|A0A060Z200|A0A060Z2	2;2;1	2;2;1	2;2;1	3	2	2	2	0	0	0	0	0	0	0	0	0	0	0	0	0	0	0	0	0	0	2	2	2	0	0	0	1	1	1	0	0	0	1	2	1	0	0	0	0	0	0	0	0	0
tr|C1BHQ1|C1BHQ1_ONCMY Profilin OS=Oncorhynchus mykiss OX=8022 GN=PROF1 PE=2 SV=1	6	6	6	1	6	6	6	2	3	2	3	3	3	1	1	2	1	2	2	2	2	2	3	5	4	3	3	5	0	2	2	4	3	4	1	1	1	5	4	5	1	2	2	1	1	2	0	0	0
tr|C1BHV5|C1BHV5_ONCMY Calmodulin OS=Oncorhynchus mykiss OX=8022 GN=CALM PE=2 SV=1;tr|C1BF07|C1BF07_ONCMY Calmodulin OS=Oncorhynchus mykiss OX=8022 GN=CALM PE=2 SV=1	1;1	1;1	1;1	2	1	1	1	0	0	0	0	0	0	0	0	0	0	1	0	0	0	0	0	0	0	0	0	0	0	0	0	0	0	0	0	0	0	0	0	0	0	0	0	0	0	0	0	0	0
tr|C1BHX3|C1BHX3_ONCMY Protein S100 OS=Oncorhynchus mykiss OX=8022 GN=S10I PE=2 SV=1;tr|C1BHS7|C1BHS7_ONCMY Protein S100 OS=Oncorhynchus mykiss OX=8022 GN=S10I PE=2 SV=1	2;2	2;2	2;2	2	2	2	2	0	0	0	1	0	0	0	0	0	1	0	1	0	0	0	0	0	0	1	2	2	0	1	1	0	1	0	1	1	2	0	1	1	0	0	0	0	0	0	0	0	0
tr|C1BHY0|C1BHY0_ONCMY Epididymal secretory protein E1 OS=Oncorhynchus mykiss OX=8022 GN=NPC2 PE=2 SV=1;tr|C1BGA1|C1BGA1_ONCMY Epididymal secretory protein E1 OS=Oncorhynchus mykiss OX=8022 GN=NPC2 PE=2 SV=1	2;2	2;2	2;2	2	2	2	2	0	0	0	0	0	0	0	0	0	0	0	0	0	0	0	0	0	0	0	1	0	0	0	0	0	0	0	0	0	0	0	1	2	0	0	0	0	0	0	0	0	0
tr|C1BI39|C1BI39_ONCMY Eukaryotic translation initiation factor 1b OS=Oncorhynchus mykiss OX=8022 GN=EIF1B PE=2 SV=1;tr|C1BF72|C1BF72_ONCMY Eukaryotic translation initiation factor 1b OS=Oncorhynchus mykiss OX=8022 GN=EIF1B PE=2 SV=1	1;1	1;1	1;1	2	1	1	1	0	0	0	0	0	0	0	0	0	0	0	0	0	0	0	0	0	0	0	0	0	0	0	0	0	0	0	0	0	0	0	0	0	0	0	0	0	0	0	0	0	0
tr|C1BI50|C1BI50_ONCMY Galectin OS=Oncorhynchus mykiss OX=8022 GN=LEG PE=2 SV=1;tr|C1BEJ9|C1BEJ9_ONCMY Galectin OS=Oncorhynchus mykiss OX=8022 GN=LEG PE=2 SV=1;tr|A0A060YW48|A0A060YW48_ONCMY Galectin (Fragment) OS=Oncorhynchus mykiss OX=8022 GN=GSONMT00046	2;2;2;1;1	2;2;2;1;1	2;2;2;1;1	5	2	2	2	0	0	0	0	0	0	0	0	0	0	0	0	0	0	0	0	0	0	1	1	1	0	0	0	0	0	1	0	0	0	0	0	0	0	0	0	0	0	0	0	0	0
tr|C1BIC8|C1BIC8_ONCMY Protein S100 OS=Oncorhynchus mykiss OX=8022 GN=S10I PE=2 SV=1	2	2	2	1	2	2	2	1	1	1	1	1	1	1	1	1	1	1	1	1	1	1	1	1	1	1	1	1	1	1	1	1	1	1	1	1	1	1	1	1	1	1	1	1	1	1	1	1	1
tr|C4B4C5|C4B4C5_ONCMY Apolipoprotein A-II OS=Oncorhynchus mykiss OX=8022 GN=apoa2 PE=2 SV=1;tr|A0A060YWV7|A0A060YWV7_ONCMY Uncharacterized protein (Fragment) OS=Oncorhynchus mykiss OX=8022 GN=GSONMT00022242001 PE=4 SV=1	12;12	12;12	6;6	2	12	12	6	6	6	6	6	6	6	6	6	7	6	7	7	7	6	7	11	10	12	7	7	7	6	6	6	6	6	6	7	7	7	8	7	7	6	6	6	6	6	6	6	6	6
tr|C5J9B3|C5J9B3_ONCMY Type-4 ice-structuring protein (Fragment) OS=Oncorhynchus mykiss OX=8022 GN=afp4 PE=2 SV=1	4	1	1	1	4	1	1	1	2	1	2	2	3	2	2	2	1	1	1	3	4	3	1	1	1	3	3	2	2	4	3	3	3	3	2	3	3	2	2	2	3	4	3	1	1	1	2	1	1
tr|D0FZZ1|D0FZZ1_ONCMY Myoglobin OS=Oncorhynchus mykiss OX=8022 GN=Mb PE=2 SV=1	9;1	9;1	9;1	2	9	9	9	4	1	1	2	2	2	2	3	2	0	0	0	1	2	2	5	4	6	1	2	1	3	4	4	4	5	5	2	3	3	3	4	3	1	1	1	0	0	0	1	1	1
tr|D5H440|D5H440_ONCMY Serum albumin 1 protein (Fragment) OS=Oncorhynchus mykiss OX=8022 GN=serum albumin 1 PE=2 SV=1	19	19	10	1	19	19	10	12	13	12	11	11	12	11	12	12	11	11	11	13	13	12	10	10	11	12	11	12	11	12	11	11	11	11	13	12	13	12	12	12	12	12	12	13	12	11	10	14	12
tr|E7BAR3|E7BAR3_ONCMY Complement factor I (Fragment) OS=Oncorhynchus mykiss OX=8022 GN=cfi PE=2 SV=1	21	21	21	1	21	21	21	10	9	8	9	9	8	12	17	16	14	15	14	11	12	13	7	8	6	9	12	13	15	15	16	14	11	13	10	11	11	10	8	12	11	14	11	10	9	8	12	13	13
tr|F1DRC4|F1DRC4_ONCMY Complement factor B/C2 OS=Oncorhynchus mykiss OX=8022 PE=2 SV=1;tr|A0A060WK53|A0A060WK53_ONCMY Uncharacterized protein OS=Oncorhynchus mykiss OX=8022 GN=GSONMT00061492001 PE=4 SV=1	19;14;4	19;14;4	19;14;4	3	19	19	19	4	4	5	6	3	3	10	10	9	9	8	6	7	6	7	6	6	8	4	4	5	11	8	8	6	7	8	10	9	8	6	6	7	6	7	6	6	5	5	2	1	3
tr|F8LFR3|F8LFR3_ONCMY Serpin peptidase inhibitor, clade F, member 2B OS=Oncorhynchus mykiss OX=8022 GN=SERPINF2B PE=2 SV=1;tr|A0A060XWD1|A0A060XWD1_ONCMY SERPIN domain-containing protein OS=Oncorhynchus mykiss OX=8022 GN=GSONMT00004211001 PE=3 SV=1;tr|A0A	2;2;1	2;2;1	2;2;1	3	2	2	2	0	0	0	0	0	0	1	1	1	1	1	1	1	2	0	1	1	1	1	1	1	1	1	1	1	1	1	1	1	1	1	1	1	1	1	1	1	1	1	1	1	1
tr|I1U8L4|I1U8L4_FLAPS Molecular chaperone DnaK (Fragment) OS=Flavobacterium psychrophilum OX=96345 GN=dnaK PE=3 SV=1;tr|A0A075S0H9|A0A075S0H9_FLAPS Chaperone protein DnaK OS=Flavobacterium psychrophilum OX=96345 GN=dnaK PE=2 SV=1;tr|A0A516P0D5|A0A516P0D5_	1;1;1;1;1;1	1;1;1;1;1;1	1;1;1;1;1;1	6	1	1	1	0	0	0	0	0	0	0	0	0	0	0	0	0	0	0	0	0	0	0	1	1	0	0	0	0	0	0	0	0	0	1	0	0	0	0	0	0	0	0	0	0	0
tr|I7KJK9|I7KJK9_ONCMY Trout C-polysaccharide binding protein 1, isoform 1 OS=Oncorhynchus mykiss OX=8022 GN=TCBP1 PE=2 SV=2	6	6	2	1	6	6	2	0	0	0	0	0	0	3	3	4	0	0	0	3	3	3	3	2	3	4	3	4	3	4	3	1	0	0	0	0	0	0	0	0	3	3	3	0	1	1	2	3	3
tr|L0R4B0|L0R4B0_ONCMY Pentaxin OS=Oncorhynchus mykiss OX=8022 GN=TCBP2 PE=2 SV=1	4;1	4;1	4;1	2	4	4	4	0	0	0	0	0	0	1	2	2	0	0	0	2	2	2	1	1	1	0	0	0	0	0	0	0	0	0	1	0	1	3	3	3	0	0	0	0	0	0	0	0	0
tr|M9PNX6|M9PNX6_ONCMY Peptidoglycan recognition protein L2 OS=Oncorhynchus mykiss OX=8022 GN=PGRP-L2 PE=2 SV=1	17	3	3	1	17	3	3	5	4	3	3	2	2	6	5	5	6	8	7	5	6	6	8	6	9	9	8	6	9	6	6	6	6	6	8	6	7	6	8	8	4	4	4	8	6	6	7	5	7
tr|P79825|P79825_ONCMY Hemopexin (Fragment) OS=Oncorhynchus mykiss OX=8022 PE=2 SV=1	19;1	19;1	11;1	2	19	19	11	17	16	15	11	11	10	11	12	11	10	11	10	12	13	13	8	8	8	9	8	8	15	13	13	11	12	11	13	14	13	12	11	11	11	11	11	12	10	10	13	14	13
tr|P79899|P79899_ONCMY Pentaxin OS=Oncorhynchus mykiss OX=8022 PE=2 SV=1;tr|A0A060YNT5|A0A060YNT5_ONCMY Pentaxin OS=Oncorhynchus mykiss OX=8022 GN=GSONMT00027446001 PE=3 SV=1	6;5	6;5	6;5	2	6	6	6	3	3	3	1	2	3	3	4	2	3	4	4	3	3	3	1	0	0	0	1	1	2	3	3	0	0	0	4	3	4	0	0	0	1	0	1	0	0	0	2	3	4
tr|P87370|P87370_ONCMY Cathepsin D OS=Oncorhynchus mykiss OX=8022 PE=2 SV=1	1	1	1	1	1	1	1	0	0	0	0	0	0	0	0	0	0	0	0	0	0	0	0	1	1	0	1	1	0	0	0	1	1	1	0	1	1	1	1	1	1	1	1	0	0	0	0	0	0
tr|Q08G23|Q08G23_ONCMY Cathelicidin-derived antimicrobial peptide 2 isoform B OS=Oncorhynchus mykiss OX=8022 GN=CATH-2B PE=4 SV=1;tr|A0A0F6QFC0|A0A0F6QFC0_ONCMY Cathelicidin-derived antimicrobial peptide 2b OS=Oncorhynchus mykiss OX=8022 GN=CATH-2b PE=2 SV	3;3;3;3;3;2	3;3;3;3;3;2	3;3;3;3;3;2	6	3	3	3	0	0	0	0	0	0	0	0	0	0	0	0	0	0	0	2	2	2	2	2	2	0	0	0	2	3	3	0	0	0	3	3	2	0	0	0	0	0	0	0	0	0
tr|Q1M179|Q1M179_ONCMY Transitional endoplasmic reticulum ATPase OS=Oncorhynchus mykiss OX=8022 PE=2 SV=1;tr|A0A060WGH6|A0A060WGH6_ONCMY Transitional endoplasmic reticulum ATPase OS=Oncorhynchus mykiss OX=8022 GN=GSONMT00075298001 PE=3 SV=1;tr|A0A060WC37|A	2;2;2;1;1	2;2;2;1;1	2;2;2;1;1	5	2	2	2	0	0	0	0	0	0	0	0	0	0	0	0	0	0	0	0	0	0	0	0	0	0	0	0	0	0	0	0	0	0	0	0	0	0	0	0	0	0	0	0	0	0
tr|Q2L4Q6|Q2L4Q6_ONCMY Complement factor H OS=Oncorhynchus mykiss OX=8022 GN=cfh PE=2 SV=1	52	52	16	1	52	52	16	23	22	25	25	26	24	26	26	25	26	29	27	27	32	30	13	13	16	32	31	33	26	26	26	26	28	27	29	31	30	25	26	27	26	29	31	24	26	24	22	27	23
tr|Q2MCX5|Q2MCX5_ONCMY Vitronectin protein 1 OS=Oncorhynchus mykiss OX=8022 GN=vtn1 PE=2 SV=2;tr|A0A060XBJ9|A0A060XBJ9_ONCMY SMB domain-containing protein OS=Oncorhynchus mykiss OX=8022 GN=GSONMT00009085001 PE=4 SV=1	2;1	2;1	2;1	2	2	2	2	0	0	0	0	0	0	0	0	0	0	0	0	0	0	0	0	0	0	0	0	0	0	1	0	0	0	0	0	0	1	0	0	0	0	0	0	0	0	0	0	0	0
tr|Q2MD38|Q2MD38_ONCMY Properdin P factor complement 2 OS=Oncorhynchus mykiss OX=8022 GN=pfc PE=2 SV=1;tr|A8YQG4|A8YQG4_ONCMY Properdin P factor 2 OS=Oncorhynchus mykiss OX=8022 GN=pfc2 PE=4 SV=2;tr|A0A060WWN2|A0A060WWN2_ONCMY Uncharacterized protein OS=On	5;5;5	2;2;2	2;2;2	3	5	2	2	3	2	1	0	1	1	3	1	3	3	0	1	1	2	0	0	0	0	2	1	2	3	3	3	0	1	1	1	2	2	0	1	0	1	1	0	0	0	1	1	2	2
tr|Q2WFI5|Q2WFI5_ONCMY Sex hormone-binding globulin OS=Oncorhynchus mykiss OX=8022 GN=GSONMT00051280001 PE=2 SV=1	16	16	16	1	16	16	16	9	11	8	7	7	9	12	10	10	9	7	8	9	9	8	7	8	9	11	12	10	10	11	11	10	9	8	11	11	10	10	11	10	11	10	9	7	9	9	5	10	9
tr|Q3LA41|Q3LA41_ONCMY Properdin P factor complement 1 OS=Oncorhynchus mykiss OX=8022 GN=pfc PE=2 SV=1	8;3	8;3	1;1	2	8	8	1	3	3	1	1	2	2	3	3	3	3	1	1	1	2	1	0	1	0	2	1	1	3	3	3	0	0	0	2	4	2	0	0	0	2	1	1	1	0	0	1	3	2
tr|Q4F877|Q4F877_ONCMY Heat shock 27 kDa protein OS=Oncorhynchus mykiss OX=8022 GN=hspb1 PE=2 SV=2;tr|A8C8V8|A8C8V8_ONCMY Heat shock 27 kDa protein OS=Oncorhynchus mykiss OX=8022 GN=hspb1 PE=2 SV=1	1;1	1;1	1;1	2	1	1	1	0	0	0	0	0	0	0	0	0	0	0	0	0	0	0	0	0	0	0	0	0	0	0	0	0	0	0	0	0	0	1	1	0	0	0	0	0	0	0	0	0	0
tr|Q4LAN6|Q4LAN6_ONCMY C-type MBL-2 protein OS=Oncorhynchus mykiss OX=8022 GN=mbl PE=2 SV=1	5;1;1	5;1;1	5;1;1	3	5	5	5	0	0	0	1	0	1	0	0	0	0	0	0	0	0	0	0	0	0	0	0	0	0	0	0	3	3	3	0	0	0	4	4	3	0	0	0	4	5	5	0	0	0
tr|Q4QZ18|Q4QZ18_ONCMY Complement factor H1 protein OS=Oncorhynchus mykiss OX=8022 PE=2 SV=2	12;2	12;2	4;1	2	12	12	4	5	5	3	7	6	6	7	5	7	7	6	7	5	5	6	3	3	3	7	5	6	7	9	9	4	3	2	7	7	6	5	6	7	7	7	6	5	6	5	9	7	6
tr|Q4QZ25|Q4QZ25_ONCMY Complement component C9 OS=Oncorhynchus mykiss OX=8022 PE=2 SV=1	30	1	1	1	30	1	1	19	19	19	16	15	17	17	18	18	18	16	17	18	18	18	23	21	22	19	19	19	18	18	17	21	21	22	18	19	19	19	20	20	17	18	18	18	18	16	14	19	17
tr|Q5DW63|Q5DW63_ONCMY Heat shock 70kDa protein 8 isoform a OS=Oncorhynchus mykiss OX=8022 GN=HSC70A PE=2 SV=1;sp|P08108|HSP70_ONCMY Heat shock cognate 70 kDa protein OS=Oncorhynchus mykiss OX=8022 GN=hsc71 PE=2 SV=2;tr|A0A060VU47|A0A060VU47_ONCMY Uncharac	7;7;6;5;3;1;1;1;1	7;7;6;5;3;1;1;1;1	2;2;1;1;1;0;0;0;0	9	7	7	2	0	0	1	0	1	0	0	0	0	0	0	1	0	0	0	0	0	0	5	4	4	0	0	0	3	2	3	0	0	0	1	2	1	0	0	0	0	0	0	0	0	0
tr|Q5DW66|Q5DW66_ONCMY Heat shock 90kDa protein 1 beta isoform a OS=Oncorhynchus mykiss OX=8022 GN=HSP90BA PE=2 SV=1;tr|A0A060XFW6|A0A060XFW6_ONCMY HATPase_c domain-containing protein OS=Oncorhynchus mykiss OX=8022 GN=GSONMT00028101001 PE=3 SV=1;tr|Q5DW65|	7;7;6;6;5;5;3;2;1;1;1;1	7;7;6;6;5;5;3;2;1;1;1;1	7;7;6;6;5;5;3;2;1;1;1;1	12	7	7	7	0	0	0	0	0	0	0	0	0	0	0	0	0	0	0	1	1	1	4	4	4	0	0	0	1	0	1	0	0	0	1	0	0	0	0	0	0	0	0	0	0	0
tr|Q5F4T3|Q5F4T3_ONCMY Alpha-1-microglobulin OS=Oncorhynchus mykiss OX=8022 GN=ambp PE=2 SV=1;tr|A0A060YFZ1|A0A060YFZ1_ONCMY Alpha-1-microglobulin OS=Oncorhynchus mykiss OX=8022 GN=GSONMT00013866001 PE=3 SV=1	8;8	8;8	8;8	2	8	8	8	2	3	3	5	5	5	5	5	4	3	4	3	4	4	5	4	4	4	4	4	4	5	6	4	5	4	4	6	7	7	4	3	3	6	5	6	3	2	3	4	2	3
tr|Q64HW8|Q64HW8_ONCMY Metalloproteinase inhibitor 2 OS=Oncorhynchus mykiss OX=8022 PE=2 SV=1;tr|A0A060YWS0|A0A060YWS0_ONCMY Uncharacterized protein OS=Oncorhynchus mykiss OX=8022 GN=GSONMT00031041001 PE=3 SV=1	3;2	3;2	3;2	2	3	3	3	0	0	0	0	0	0	0	0	0	0	0	0	0	0	0	0	0	0	2	2	1	0	0	0	1	1	2	0	0	0	1	2	2	0	0	0	0	0	0	0	0	0
tr|Q6H963|Q6H963_ONCMY Complement component C8 gamma OS=Oncorhynchus mykiss OX=8022 GN=c8 gamma PE=2 SV=2;tr|A0A060XV51|A0A060XV51_ONCMY Lipocln_cytosolic_FA-bd_dom domain-containing protein OS=Oncorhynchus mykiss OX=8022 GN=GSONMT00057235001 PE=3 SV=1	4;4	4;4	4;4	2	4	4	4	1	1	2	1	1	1	2	2	2	1	1	1	0	0	1	2	2	2	1	2	2	3	1	2	2	2	1	3	3	2	2	3	1	2	1	2	0	0	0	1	1	2
tr|Q6H964|Q6H964_ONCMY Complement component C6 OS=Oncorhynchus mykiss OX=8022 GN=c6 PE=2 SV=2;tr|A0A060W602|A0A060W602_ONCMY Uncharacterized protein OS=Oncorhynchus mykiss OX=8022 GN=GSONMT00067246001 PE=3 SV=1	33;29;1	33;29;1	33;29;1	3	33	33	33	15	19	19	11	11	11	12	18	17	13	13	15	12	16	15	14	10	10	13	16	15	15	13	11	12	14	15	14	15	16	16	20	14	11	9	10	13	12	11	13	15	14
tr|Q6H965|Q6H965_ONCMY Complement component C7-2 OS=Oncorhynchus mykiss OX=8022 GN=c7-2 PE=2 SV=2;tr|A0A060YFI6|A0A060YFI6_ONCMY Uncharacterized protein OS=Oncorhynchus mykiss OX=8022 GN=GSONMT00004195001 PE=3 SV=1	16;16	15;15	15;15	2	16	15	15	9	11	10	8	6	6	8	7	9	4	5	4	5	4	5	3	3	5	6	7	6	8	8	8	5	5	5	9	8	7	6	8	7	9	5	5	4	3	4	6	5	8
tr|Q6UFZ4|Q6UFZ4_ONCMY 14-3-3E2 protein OS=Oncorhynchus mykiss OX=8022 PE=2 SV=1;tr|A0A060X7F8|A0A060X7F8_ONCMY 14_3_3 domain-containing protein OS=Oncorhynchus mykiss OX=8022 GN=GSONMT00062638001 PE=3 SV=1;tr|Q6PUV9|Q6PUV9_ONCMY 14-3-3 protein OS=Oncorhyn	2;2;2;2;1	1;1;1;1;1	1;1;1;1;1	5	2	1	1	1	1	1	0	0	1	2	2	2	1	0	1	0	1	1	0	0	0	2	2	2	2	1	1	2	2	2	1	1	0	2	2	2	1	1	1	0	0	0	0	0	0
tr|Q6XZB7|Q6XZB7_ONCMY Complement C4 (Fragment) OS=Oncorhynchus mykiss OX=8022 PE=2 SV=1	25	3	1	1	25	3	1	6	5	5	8	6	10	16	15	16	11	11	8	14	16	16	10	10	13	15	17	14	9	8	6	4	5	3	6	9	9	7	9	9	7	7	7	7	7	6	10	10	10
tr|Q70TF5|Q70TF5_ONCMY Complement C4 OS=Oncorhynchus mykiss OX=8022 GN=c4 PE=2 SV=1	45	45	3	1	45	45	3	12	13	13	14	11	16	28	27	31	18	17	18	27	30	27	15	14	18	25	26	23	15	14	13	9	8	8	14	16	14	13	14	15	12	9	10	13	13	9	18	15	17
tr|Q70W31|Q70W31_ONCMY C1R/C1S subunit of Ca2+-dependent complex OS=Oncorhynchus mykiss OX=8022 GN=c1r/c1s PE=2 SV=1	6	2	1	1	6	2	1	2	2	1	1	1	0	3	3	3	3	3	3	3	3	3	4	5	4	5	6	4	2	3	3	2	3	3	2	2	3	2	2	3	1	2	2	2	2	3	3	3	3
tr|Q70W32|Q70W32_ONCMY C1 inhibitor OS=Oncorhynchus mykiss OX=8022 GN=c1 Inh PE=2 SV=1	21;10;1	21;10;1	9;7;0	3	21	21	9	5	3	4	3	3	3	11	10	11	12	12	13	9	8	9	8	10	9	10	10	9	7	8	4	7	10	7	10	12	11	5	8	10	7	7	7	7	4	4	3	5	4
tr|Q70Z26|Q70Z26_ONCMY Actin beta OS=Oncorhynchus mykiss OX=8022 GN=B-actin PE=2 SV=1;tr|Q9I8X4|Q9I8X4_ONCMY Beta-actin OS=Oncorhynchus mykiss OX=8022 PE=2 SV=1;tr|Q9I9G8|Q9I9G8_ONCMY B-actin (Fragment) OS=Oncorhynchus mykiss OX=8022 PE=2 SV=1;tr|A0A061A0R	14;13;10;8;6;4;4;1	14;13;10;8;6;4;4;1	5;4;2;1;1;2;2;1	8	14	14	5	7	9	6	8	10	9	10	9	7	9	10	12	7	9	7	8	9	9	11	13	12	6	6	6	9	9	8	5	4	4	10	12	12	4	5	4	6	5	6	4	6	7
tr|Q71B03|Q71B03_ONCMY RBP2 OS=Oncorhynchus mykiss OX=8022 PE=2 SV=1	5	1	0	1	5	1	0	4	5	3	2	1	1	1	2	2	1	1	0	2	2	2	0	1	1	2	1	1	1	3	2	1	1	1	1	2	2	2	2	2	2	2	2	1	1	1	1	0	0
tr|Q7T2K6|Q7T2K6_ONCMY Carbonic anhydrase OS=Oncorhynchus mykiss OX=8022 GN=GSONMT00073683001 PE=2 SV=1	9;2	9;2	8;2	2	9	9	8	7	7	8	4	2	3	7	4	6	5	7	8	2	4	2	0	0	0	0	0	0	4	3	4	3	5	3	0	0	0	2	2	1	4	3	2	2	1	1	0	0	0
tr|Q7ZT81|Q7ZT81_ONCMY Toll-like receptor5 OS=Oncorhynchus mykiss OX=8022 GN=TLR5 PE=2 SV=1;tr|A0A060Y7T8|A0A060Y7T8_ONCMY Uncharacterized protein OS=Oncorhynchus mykiss OX=8022 GN=GSONMT00013855001 PE=3 SV=1	2;2	2;2	1;1	2	2	2	1	0	0	0	0	0	0	0	0	0	0	0	0	0	0	0	0	0	0	0	0	0	0	0	0	0	0	0	0	0	0	2	1	2	0	0	0	0	0	0	0	0	0
tr|Q7ZZW1|Q7ZZW1_ONCMY Alpha-1-antiproteinase-like protein OS=Oncorhynchus mykiss OX=8022 GN=antiprot1 PE=2 SV=1	23	23	23	1	23	23	23	12	10	11	8	9	8	11	10	9	9	9	10	12	10	12	12	16	13	13	13	10	11	10	12	10	9	9	14	13	11	10	10	9	9	10	10	8	7	8	10	9	10
tr|Q804V3|Q804V3_ONCMY Transferrin (Fragment) OS=Oncorhynchus mykiss OX=8022 PE=4 SV=1	4	1	1	1	4	1	1	4	4	4	3	2	3	2	2	2	3	3	3	2	2	2	2	2	2	2	2	2	3	3	3	2	2	2	2	2	2	2	2	2	2	3	3	2	2	2	2	3	3
tr|Q8AWI2|Q8AWI2_ONCMY Tubulin alpha chain (Fragment) OS=Oncorhynchus mykiss OX=8022 GN=alpha tubulin PE=2 SV=1;sp|P18288|TBAT_ONCMY Tubulin alpha chain, testis-specific OS=Oncorhynchus mykiss OX=8022 PE=2 SV=1;tr|A0A060XZL2|A0A060XZL2_ONCMY Uncharacterize	3;2;2	1;1;1	0;0;0	3	3	1	0	1	1	1	0	1	1	1	1	1	1	1	1	0	0	0	0	0	0	1	1	1	1	1	0	0	0	0	0	0	0	1	0	0	0	0	1	0	0	0	0	0	0
tr|Q8AYA0|Q8AYA0_ONCMY LDL receptor (Fragment) OS=Oncorhynchus mykiss OX=8022 PE=2 SV=1;tr|A0A060YY16|A0A060YY16_ONCMY EGF-like domain-containing protein (Fragment) OS=Oncorhynchus mykiss OX=8022 GN=GSONMT00023664001 PE=4 SV=1	2;2	2;2	2;2	2	2	2	2	0	0	0	0	0	0	0	0	0	0	0	0	0	0	0	0	0	0	0	0	0	0	0	0	0	0	0	0	0	0	0	0	0	0	0	0	0	0	0	0	0	0
tr|Q8JJ66|Q8JJ66_ONCMY Toxin-1 OS=Oncorhynchus mykiss OX=8022 PE=2 SV=1;tr|A0A060ZFQ0|A0A060ZFQ0_ONCMY Uncharacterized protein OS=Oncorhynchus mykiss OX=8022 GN=GSONMT00018754001 PE=4 SV=1	2;2	2;2	2;2	2	2	2	2	2	2	2	1	1	1	1	1	1	1	1	1	1	1	1	1	1	1	1	1	1	1	1	1	1	1	1	1	1	1	1	1	1	1	1	1	1	1	1	1	1	1
tr|Q8QFQ6|Q8QFQ6_ONCMY 92 kDa gelatinase OS=Oncorhynchus mykiss OX=8022 GN=mmp9 PE=2 SV=1;tr|A0A060YEA1|A0A060YEA1_ONCMY 92 kDa gelatinase OS=Oncorhynchus mykiss OX=8022 GN=GSONMT00062737001 PE=3 SV=1	19;17;3	19;17;3	19;17;3	3	19	19	19	0	0	0	0	0	0	0	0	0	0	0	0	0	0	0	0	0	0	11	9	10	0	0	0	5	5	3	0	0	0	12	15	18	0	0	0	0	0	0	0	0	0
tr|Q8QGB5|Q8QGB5_ONCMY VHSV-induced protein-3 OS=Oncorhynchus mykiss OX=8022 PE=2 SV=1;tr|A0A060ZHX0|A0A060ZHX0_ONCMY Uncharacterized protein OS=Oncorhynchus mykiss OX=8022 GN=GSONMT00025643001 PE=4 SV=1	3;3;1;1;1	3;3;1;1;1	3;3;1;1;1	5	3	3	3	0	0	0	0	0	0	0	0	0	0	0	0	0	0	0	0	0	0	0	0	0	0	0	0	0	0	0	0	0	0	0	0	0	0	0	0	0	0	0	0	0	0
tr|Q8QHI0|Q8QHI0_ONCMY Superoxide dismutase [Cu-Zn] OS=Oncorhynchus mykiss OX=8022 GN=SOD1 PE=2 SV=1;tr|A0A060YVP3|A0A060YVP3_ONCMY Superoxide dismutase [Cu-Zn] OS=Oncorhynchus mykiss OX=8022 GN=GSONMT00033312001 PE=3 SV=1	2;2	2;2	2;2	2	2	2	2	0	0	0	0	0	0	0	0	0	2	1	0	0	0	0	1	1	1	0	0	0	0	0	0	1	2	2	0	0	0	0	1	1	0	0	0	0	0	0	0	0	0
tr|Q90WC7|Q90WC7_ONCMY Myosin light chain 1 OS=Oncorhynchus mykiss OX=8022 PE=2 SV=1;tr|A0A060XG61|A0A060XG61_ONCMY Uncharacterized protein OS=Oncorhynchus mykiss OX=8022 GN=GSONMT00056574001 PE=4 SV=1	5;3	5;3	4;2	2	5	5	4	0	0	0	0	0	0	0	0	0	0	0	0	0	0	0	0	0	0	4	4	4	0	0	0	0	0	1	0	0	0	0	0	0	0	0	0	0	0	0	0	0	0
tr|Q90ZF1|Q90ZF1_ONCMY Glyceraldehyde-3-phosphate dehydrogenase OS=Oncorhynchus mykiss OX=8022 PE=2 SV=1;tr|Q90Z48|Q90Z48_ONCMY Glyceraldehyde phosphate dehydrogenase OS=Oncorhynchus mykiss OX=8022 PE=2 SV=1;tr|A0A060Y562|A0A060Y562_ONCMY Gp_dh_C domain-co	9;6;5;4;2;2	9;6;5;4;2;2	7;5;3;3;2;2	6	9	9	7	4	5	5	4	4	4	0	0	1	0	0	0	2	0	0	3	3	3	7	8	7	3	2	3	6	8	7	0	0	0	5	4	4	0	1	0	3	2	1	1	0	1
tr|Q910C0|Q910C0_ONCMY Collagen a1(I) OS=Oncorhynchus mykiss OX=8022 GN=COL1A1 PE=2 SV=1;tr|A0A060WU51|A0A060WU51_ONCMY VWFC domain-containing protein OS=Oncorhynchus mykiss OX=8022 GN=GSONMT00040585001 PE=4 SV=1;tr|A0A060XC11|A0A060XC11_ONCMY Fibrillar co	2;1;1;1;1	2;1;1;1;1	2;1;1;1;1	5	2	2	2	0	0	0	0	0	0	0	0	0	0	0	0	0	0	0	0	0	0	0	0	0	0	1	1	0	0	0	0	0	1	0	0	0	0	0	0	0	0	0	0	0	0
tr|Q91208|Q91208_ONCMY Myosin heavy chain (Fragment) OS=Oncorhynchus mykiss OX=8022 PE=2 SV=1	32	3	0	1	32	3	0	0	0	0	0	0	0	0	0	0	0	0	0	0	0	0	4	4	5	21	21	24	0	0	0	20	19	23	0	0	0	3	4	4	0	0	0	0	0	0	0	0	0
tr|Q91452|Q91452_ONCMY Anion exchange protein OS=Oncorhynchus mykiss OX=8022 PE=2 SV=1;sp|P32847|B3AT_ONCMY Band 3 anion exchange protein OS=Oncorhynchus mykiss OX=8022 GN=slc4a1 PE=2 SV=2;tr|A0A060ZA60|A0A060ZA60_ONCMY Anion exchange protein (Fragment) OS	7;6;4;4;1;1;1;1;1	7;6;4;4;1;1;1;1;1	7;6;4;4;1;1;1;1;1	9	7	7	7	2	2	2	2	0	2	2	2	0	5	4	5	0	0	0	0	0	0	0	0	0	0	0	0	0	0	0	0	0	0	0	0	0	0	0	0	0	0	0	0	0	0
tr|Q92004|Q92004_ONCMY Beta-2-microglobulin OS=Oncorhynchus mykiss OX=8022 GN=B2m PE=2 SV=1;tr|Q91966|Q91966_ONCMY Beta-2-microglobulin OS=Oncorhynchus mykiss OX=8022 GN=B2m PE=2 SV=1;tr|Q91203|Q91203_ONCMY Beta-2-microglobulin OS=Oncorhynchus mykiss OX=80	3;3;3;3;2;2;2;2;2;2	3;3;3;3;2;2;2;2;2;2	3;3;3;3;2;2;2;2;2;2	10	3	3	3	3	3	3	2	3	2	2	2	2	2	2	2	2	2	1	0	1	1	3	2	2	2	2	2	2	2	2	2	2	2	3	3	3	0	2	2	1	2	2	1	2	2
tr|Q98973|Q98973_ONCMY Alpha-globin I OS=Oncorhynchus mykiss OX=8022 GN=GSONMT00008805001 PE=2 SV=1;tr|C1BG02|C1BG02_ONCMY Hemoglobin subunit alpha-4 OS=Oncorhynchus mykiss OX=8022 GN=HBA4 PE=2 SV=1;tr|C1BEY1|C1BEY1_ONCMY Hemoglobin subunit alpha-4 OS=Onco	14;13;9;7	14;13;9;7	3;3;3;3	4	14	14	3	10	9	10	7	7	6	7	8	9	10	10	10	8	8	7	6	4	5	6	5	5	7	7	9	7	6	7	5	4	3	7	7	6	7	10	10	8	7	6	5	6	5
tr|Q98974|Q98974_ONCMY Alpha-globin IV OS=Oncorhynchus mykiss OX=8022 GN=HBA1 PE=2 SV=1;tr|C1BG68|C1BG68_ONCMY Hemoglobin subunit alpha-1 OS=Oncorhynchus mykiss OX=8022 GN=HBA1 PE=2 SV=1;sp|P02019|HBA1_ONCMY Hemoglobin subunit alpha-1 OS=Oncorhynchus mykis	13;12;11;10;10;7;6	13;12;11;10;10;7;6	6;6;4;6;6;4;2	7	13	13	6	7	8	8	8	7	8	8	7	8	9	9	8	8	7	7	4	4	4	4	4	5	8	7	7	6	6	6	2	4	2	6	4	6	8	9	9	6	6	6	5	5	5
tr|Q98977|Q98977_ONCMY Complement component C3-3 (Fragment) OS=Oncorhynchus mykiss OX=8022 PE=2 SV=2	82	7	6	1	82	7	6	31	30	32	22	23	25	31	35	30	34	33	32	35	36	38	31	36	35	28	28	26	31	29	28	33	36	35	27	34	28	42	43	47	26	27	26	38	43	39	37	35	39
tr|Q9DDV9|Q9DDV9_ONCMY Complement component C3-4 (Fragment) OS=Oncorhynchus mykiss OX=8022 PE=2 SV=1	45	37	1	1	45	37	1	14	10	10	12	13	12	22	23	21	14	14	19	21	25	26	14	18	13	26	27	27	23	23	24	12	15	11	23	29	25	19	21	22	23	23	19	22	20	19	28	29	31
tr|Q9DEC8|Q9DEC8_ONCMY Complement factor B/C2-B OS=Oncorhynchus mykiss OX=8022 GN=BFC2-B PE=2 SV=1	23;9;6;5	23;9;6;5	23;9;6;5	4	23	23	23	5	5	7	1	3	3	10	6	8	5	8	7	14	16	11	5	5	7	7	5	7	10	6	8	8	6	9	11	9	9	9	11	9	5	2	2	7	4	6	3	1	4
tr|Q9DFD0|Q9DFD0_ONCMY Putative vitronectin-like protein (Fragment) OS=Oncorhynchus mykiss OX=8022 PE=2 SV=1	4	2	1	1	4	2	1	3	3	4	3	3	2	3	4	4	2	4	4	4	4	3	1	1	1	2	4	4	3	3	4	3	2	2	3	4	4	3	4	4	3	4	3	2	1	2	2	2	3
tr|Q9DFD5|Q9DFD5_ONCMY Differentially regulated trout protein 1 OS=Oncorhynchus mykiss OX=8022 GN=GSONMT00025517001 PE=2 SV=1	4	4	2	1	4	4	2	0	0	0	0	0	0	1	1	1	2	2	2	2	2	2	2	2	2	3	2	2	1	0	1	2	2	2	2	2	2	3	2	2	0	1	1	2	2	2	1	0	0
tr|Q9DFF5|Q9DFF5_ONCMY Complement C1 inhibitor OS=Oncorhynchus mykiss OX=8022 PE=2 SV=1	5;1	2;1	2;1	2	5	2	2	2	2	2	2	3	3	3	3	4	4	4	3	3	2	2	2	2	2	3	3	3	2	3	1	3	3	3	3	3	3	3	3	4	2	4	3	2	2	4	2	2	2
tr|Q9DFF7|Q9DFF7_ONCMY Biotinidase 2 (Fragment) OS=Oncorhynchus mykiss OX=8022 PE=2 SV=1	5	5	5	1	5	5	5	2	2	3	3	1	1	2	2	2	2	2	2	3	3	3	4	4	4	3	3	3	3	3	3	2	2	1	3	2	3	3	3	3	3	3	3	2	1	1	2	2	2
tr|Q9DFF8|Q9DFF8_ONCMY Biotinidase 1 (Fragment) OS=Oncorhynchus mykiss OX=8022 PE=2 SV=1	6	6	1	1	6	6	1	2	2	2	2	2	2	2	1	1	2	3	2	2	1	1	2	2	4	1	2	2	2	2	2	2	2	2	2	2	1	2	2	2	2	2	2	1	1	2	2	2	2
tr|Q9DFF9|Q9DFF9_ONCMY Cysteine proteinase (Fragment) OS=Oncorhynchus mykiss OX=8022 PE=2 SV=1	8	1	1	1	8	1	1	7	6	4	4	4	3	4	3	3	3	3	3	3	3	4	2	2	2	5	5	3	4	4	4	3	3	4	5	5	4	3	4	4	4	4	4	3	4	4	4	3	4
tr|Q9DG75|Q9DG75_ONCMY Apolipoprotein C-II OS=Oncorhynchus mykiss OX=8022 GN=GSONMT00003094001 PE=2 SV=1	2	2	2	1	2	2	2	2	2	1	2	2	2	1	2	1	1	1	1	2	1	1	2	2	2	1	1	1	2	2	1	1	1	1	2	2	1	2	1	1	1	1	2	2	1	1	2	2	2
tr|Q9I9M6|Q9I9M6_ONCMY Zona pellucida sperm-binding protein 3 OS=Oncorhynchus mykiss OX=8022 PE=2 SV=1;tr|A0A060XQ20|A0A060XQ20_ONCMY Zona pellucida sperm-binding protein 3 OS=Oncorhynchus mykiss OX=8022 GN=GSONMT00052544001 PE=3 SV=1	14;12	14;12	14;12	2	14	14	14	5	3	3	4	3	3	8	9	10	0	0	0	8	7	9	2	1	1	1	0	1	10	7	7	5	7	7	12	11	11	3	1	0	6	6	9	1	0	0	0	0	0
tr|Q9I9M7|Q9I9M7_ONCMY Vitelline envelope protein beta OS=Oncorhynchus mykiss OX=8022 PE=2 SV=1	12	12	4	1	12	12	4	0	0	0	0	0	0	3	3	4	0	0	0	4	5	3	1	0	1	0	0	0	3	5	3	1	1	2	8	7	8	0	0	0	5	4	5	0	0	0	0	0	0
tr|Q9I9M8|Q9I9M8_ONCMY Vitelline envelope protein alpha OS=Oncorhynchus mykiss OX=8022 PE=2 SV=1;tr|A0A060ZAY2|A0A060ZAY2_ONCMY Uncharacterized protein (Fragment) OS=Oncorhynchus mykiss OX=8022 GN=GSONMT00007149001 PE=4 SV=1	2;1	2;1	2;1	2	2	2	2	0	0	0	0	0	0	0	0	0	0	0	0	1	2	2	0	0	0	0	0	0	0	0	0	0	0	0	1	1	1	0	0	0	1	1	1	0	0	0	0	0	0
tr|Q9IB53|Q9IB53_ONCMY Rhamnose binding lectin STL1 OS=Oncorhynchus mykiss OX=8022 GN=stl1 PE=2 SV=1	10	10	1	1	10	10	1	3	3	5	5	3	3	5	8	5	3	7	5	5	4	6	1	3	3	7	7	6	6	6	7	6	5	5	6	6	7	7	8	6	5	3	5	5	4	5	3	3	2
tr|Q9PT02|Q9PT02_ONCMY Apolipoprotein E OS=Oncorhynchus mykiss OX=8022 GN=apoE PE=2 SV=1	18;2;1	18;2;1	11;2;1	3	18	18	11	9	11	8	7	8	6	5	4	6	9	11	10	7	8	5	9	12	11	5	5	7	4	7	7	7	10	6	8	9	7	11	6	10	7	7	8	8	10	9	6	4	6
tr|Q9PT13|Q9PT13_ONCMY Serotransferrin OS=Oncorhynchus mykiss OX=8022 PE=2 SV=1	61;12	3;1	2;1	2	61	3	2	43	41	40	29	31	31	32	35	34	32	36	37	32	36	37	38	41	40	34	35	36	34	36	33	33	34	34	35	35	35	34	35	36	34	32	33	35	35	36	33	33	35
tr|Q9PT14|Q9PT14_ONCMY Precerebellin-like protein OS=Oncorhynchus mykiss OX=8022 GN=CBLNL PE=2 SV=2	9	9	9	1	9	9	9	4	4	4	4	3	4	5	5	5	6	5	6	6	6	6	8	8	7	6	6	6	5	4	5	5	6	5	5	5	5	6	7	6	6	4	5	6	6	7	6	5	5
tr|Q9W635|Q9W635_ONCMY 72 kDa gelatinase OS=Oncorhynchus mykiss OX=8022 PE=2 SV=1;tr|A0A061AE60|A0A061AE60_ONCMY Uncharacterized protein OS=Oncorhynchus mykiss OX=8022 GN=GSONMT00021917001 PE=4 SV=1;tr|A0A060Y9D1|A0A060Y9D1_ONCMY Uncharacterized protein OS	3;2;2	3;2;2	3;2;2	3	3	3	3	1	1	1	1	1	1	0	0	0	1	1	0	0	1	0	2	2	2	1	0	0	0	0	0	0	1	0	0	0	0	1	1	2	0	0	0	0	0	0	0	0	0
tr|Q9YGE7|Q9YGE7_ONCMY Complement factor Bf-1 OS=Oncorhynchus mykiss OX=8022 PE=2 SV=1	27	3	3	1	27	3	3	9	8	7	9	7	8	10	10	7	8	8	9	9	7	7	7	9	12	10	10	11	17	19	18	15	16	15	6	5	7	12	13	13	10	8	7	12	13	8	9	9	10
tr|Q9YGE8|Q9YGE8_ONCMY Complement factor Bf-2 (Fragment) OS=Oncorhynchus mykiss OX=8022 PE=2 SV=1;tr|A0A060PQD9|A0A060PQD9_ONCMY Complement factor Bf-2 (Fragment) OS=Oncorhynchus mykiss OX=8022 GN=Cfbf2 PE=2 SV=1	56;44	56;44	5;5	2	56	56	5	19	20	19	17	18	17	23	22	23	20	22	23	25	25	27	31	34	32	26	24	24	28	26	30	23	28	26	22	22	25	28	28	27	21	20	22	24	23	20	16	16	19
tr|R4J0Y6|R4J0Y6_ONCMY Parvalbumin beta 1 (Fragment) OS=Oncorhynchus mykiss OX=8022 GN=Parvb1 PE=3 SV=1;tr|E0WDA2|E0WDA2_ONCMY Parvalbumin beta-1 OS=Oncorhynchus mykiss OX=8022 GN=pvalb1 PE=2 SV=1;tr|A0A060XWA9|A0A060XWA9_ONCMY Uncharacterized protein OS=O	5;5;5;4	5;5;5;4	4;4;4;3	4	5	5	4	3	2	2	1	1	0	0	0	0	0	0	0	0	0	0	0	0	1	4	4	4	0	0	0	4	4	4	0	0	0	3	3	3	0	0	0	1	1	1	0	0	0
tr|S0F2P2|S0F2P2_ONCMY Creatine kinase OS=Oncorhynchus mykiss OX=8022 GN=CKM PE=2 SV=1;tr|A0A060VTS4|A0A060VTS4_ONCMY Creatine kinase OS=Oncorhynchus mykiss OX=8022 GN=GSONMT00077589001 PE=3 SV=1	22;19;2	22;19;2	6;3;0	3	22	22	6	5	6	7	0	1	1	0	0	0	0	0	0	0	0	0	11	11	12	13	13	14	1	1	0	12	14	14	0	0	0	7	6	9	0	0	0	5	4	4	0	0	0
tr|W5S4D9|W5S4D9_ONCMY Proteasome activator complex subunit 1-2 (Fragment) OS=Oncorhynchus mykiss OX=8022 GN=GSONMT00017960001 PE=2 SV=1;tr|C1BI97|C1BI97_ONCMY Proteasome activator complex subunit 1 OS=Oncorhynchus mykiss OX=8022 GN=PSME1 PE=2 SV=1;tr|C1BE	2;2;1;1;1	2;2;1;1;1	2;2;1;1;1	5	2	2	2	0	0	0	0	0	0	0	0	0	0	0	0	0	0	0	0	0	0	0	0	1	0	0	0	0	0	0	0	0	0	0	0	0	0	0	0	0	0	0	0	0	0
tr|W8SKC6|W8SKC6_ONCMY Periostin OS=Oncorhynchus mykiss OX=8022 PE=2 SV=1;tr|A0A060YQ06|A0A060YQ06_ONCMY EMI domain-containing protein OS=Oncorhynchus mykiss OX=8022 GN=GSONMT00008321001 PE=4 SV=1	2;1	1;1	1;1	2	2	1	1	0	0	0	0	0	0	0	0	0	0	0	0	0	0	0	0	0	0	0	0	0	0	0	0	0	0	0	1	0	1	0	0	0	0	0	0	0	0	0	1	0	1
tr|W8W0X1|W8W0X1_ONCMY Glutathione peroxidase 4a1 OS=Oncorhynchus mykiss OX=8022 GN=gpx4a1 PE=2 SV=1;tr|A0A060XXR7|A0A060XXR7_ONCMY Glutathione peroxidase OS=Oncorhynchus mykiss OX=8022 GN=GSONMT00018032001 PE=3 SV=1	5;3;1;1;1	5;3;1;1;1	5;3;1;1;1	5	5	5	5	3	4	1	4	3	4	0	1	0	0	0	1	2	2	1	0	0	1	1	1	0	1	1	0	1	2	0	4	3	4	0	1	0	2	2	1	0	0	0	1	1	1
tr|W8W0Y8|W8W0Y8_ONCMY Glutathione peroxidase OS=Oncorhynchus mykiss OX=8022 GN=gpx1b2 PE=2 SV=1;tr|Q5UTE7|Q5UTE7_ONCMY Glutathione peroxidase OS=Oncorhynchus mykiss OX=8022 GN=GSONMT00070684001 PE=2 SV=1	4;3;1;1	4;3;1;1	3;3;1;1	4	4	4	3	0	0	0	0	0	0	0	0	0	0	1	1	0	0	0	0	0	0	0	0	0	0	0	0	0	0	0	0	0	0	0	0	0	0	0	0	0	0	0	0	0	0
	7	7	7	1	7	7	7	6	6	6	6	6	6	6	7	6	5	5	6	7	7	7	5	4	4	3	5	5	6	6	5	4	3	3	5	5	6	6	6	6	5	5	5	4	4	4	3	4	4
	1	1	1	1	1	1	1	0	1	0	0	0	0	1	1	1	0	0	0	0	0	0	0	0	0	1	0	0	1	0	0	1	1	1	1	1	1	1	0	1	0	0	0	0	0	0	0	0	0
[truncated: 302 more columns]

## Sheet: Table S2.2.
Table S2.2. LFQ intensity of identified Oncorhynchus mykiss proteins (filtered, log2 transformed, averaged over median, normalized by median centering and imputed by MinProb method).
FishGroup				AS				IP				SL					AS				IP				SL					AS												IP
ProteinID	ProteinName	Unique peptides	Score	LFQ 21_log2_MedCent_median_MinProb	LFQ 22_log2_MedCent_median_MinProb	LFQ 23_log2_MedCent_median_MinProb	LFQ 26_log2_MedCent_median_MinProb	LFQ 25_log2_MedCent_median_MinProb	LFQ 29_log2_MedCent_median_MinProb	LFQ 33_log2_MedCent_median_MinProb	LFQ 39_log2_MedCent_median_MinProb	LFQ 27_log2_MedCent_median_MinProb	LFQ 28_log2_MedCent_median_MinProb	LFQ 32_log2_MedCent_median_MinProb	LFQ 36_log2_MedCent_median_MinProb	LFQ 38_log2_MedCent_median_MinProb	LFQ 21_log2_MedCent_median	LFQ 22_log2_MedCent_median	LFQ 23_log2_MedCent_median	LFQ 26_log2_MedCent_median	LFQ 25_log2_MedCent_median	LFQ 29_log2_MedCent_median	LFQ 33_log2_MedCent_median	LFQ 39_log2_MedCent_median	LFQ 27_log2_MedCent_median	LFQ 28_log2_MedCent_median	LFQ 32_log2_MedCent_median	LFQ 36_log2_MedCent_median	LFQ 38_log2_MedCent_median	LFQ 21_log2_MedCent_1	LFQ 21_log2_MedCent_2	LFQ 21_log2_MedCent_3	LFQ 22_log2_MedCent_1	LFQ 22_log2_MedCent_2	LFQ 22_log2_MedCent_3	LFQ 23_log2_MedCent_1	LFQ 23_log2_MedCent_2	LFQ 23_log2_MedCent_3	LFQ 26_log2_MedCent_1	LFQ 26_log2_MedCent_2	LFQ 26_log2_MedCent_3	LFQ 25_log2_MedCent_1	LFQ 25_log2_MedCent_2	LFQ 25_log2_MedCent_3	LFQ 29_log2_MedCent_1	LFQ 29_log2_MedCent_2	LFQ 29_log2_MedCent_3	LFQ 33_log2_MedCent_1	LFQ 33_log2_MedCent_2
A0A060WCH3	Apolipoprotein B-100-like, DUF1943 domain-containing protein	13	323.31	30.3037	29.8033	29.0882	28.6351	27.4074	29.5517	29.7887	29.3093	23.2862	23.6033	25.0193	25.5842	24.7682	30.2817	29.7817	29.067	28.6143	27.3875	29.5302	29.767	29.288	23.2693	NA	25.0011	25.5656	24.7502	30.2817	30.2977	30.2585	29.7817	29.9277	29.6875	29.067	28.9551	29.0727	28.4443	28.6143	28.6908	27.7282	27.3875	27.133	29.869	29.2816	29.5302	29.5643	30.0352
A0A060W754	Apolipoprotein B-100-like;Vitellogenin domain-containing protein	46	323.31	30.3114	30.2802	29.5498	28.9815	27.6078	29.7156	29.5774	29.3878	25.1126	23.4076	26.8907	26.2998	27.3171	30.2894	30.2582	29.5284	28.9605	27.5878	29.694	29.5559	29.3664	NA	NA	26.8712	26.2807	27.2973	30.3308	30.2318	30.2894	30.424	30.2582	30.1019	29.5284	29.5066	29.7293	28.8612	28.9605	29.0199	27.9967	27.5878	27.3462	29.9193	29.694	29.525	29.4464	29.7416
A0A060WW01	alpha-2-macroglobulin-like, MG3 domain-containing protein	4	32.474	28.49	27.4791	27.4366	27.8451	27.9805	27.4563	28.1441	27.2948	23.6738	26.0274	23.1888	23.5886	26.5682	28.4693	27.4592	27.4166	27.8249	27.9602	27.4364	28.1237	27.275	NA	26.0085	NA	NA	26.5489	28.4693	28.4527	28.5879	27.4592	27.6773	27.2863	27.4166	26.9457	27.7321	27.8249	27.8675	27.5274	28.1077	27.8055	27.9602	27.5407	27.2609	27.4364	28.2028	27.6156
A0A060YU50	Apolipoprotein M-like protein	8	323.31	28.3195	28.1372	28.7604	28.0934	27.0326	28.2136	28.8104	28.5322	25.0602	25.9451	26.2922	25.8739	26.3784	28.2989	28.1167	28.7395	28.073	27.0129	28.1931	28.7894	28.5115	25.042	25.9263	26.2731	25.8552	26.3593	28.2989	28.2911	28.3895	28.2383	28.1167	28.1128	28.6026	28.7395	29.0162	28.0334	28.073	28.2671	27.5062	26.9622	27.0129	28.4694	28.1931	28.1131	28.5719	29.0446
A0A060WI78	Kininogen-1-like	4	91.034	25.2928	25.627	25.0855	25.4497	24.7653	23.8492	26.2471	25.4362	22.772	24.178	23.5592	23.1552	24.7465	25.2744	NA	25.0673	25.4313	NA	NA	26.2281	25.4177	NA	NA	NA	NA	NA	NA	25.3393	25.2096	NA	NA	NA	24.691	NA	25.4436	25.3086	25.5539	NA	NA	NA	24.8776	24.8464	NA	NA	26.1561	26.448
A0A060YJC7	Hemoglobin subunit alpha	7	228.11	30.3716	29.4489	29.9404	29.1914	31.7029	28.9605	27.1552	23.6142	27.4338	27.1268	29.3671	28.2673	28.1441	30.3495	29.4275	29.9187	29.1702	31.6799	28.9394	27.1355	NA	27.4139	27.1071	29.3458	28.2468	28.1237	30.2527	30.3495	30.3966	29.5515	29.4275	29.4249	29.9187	29.914	30.1112	29.1702	29.0901	29.3883	31.9725	31.6799	31.5094	29.2507	28.7166	28.9394	26.9791	27.2918
A0A060YKT0	Apolipoprotein A-I-like	8	184.77	26.6157	26.1164	25.8027	25.2351	25.0267	26.0585	25.9646	25.1294	25.0474	24.2033	25.1318	23.8034	23.785	26.5964	26.0975	25.7839	25.2167	NA	26.0396	25.9457	NA	25.0292	NA	25.1135	NA	NA	26.5947	26.5964	26.7071	25.8474	26.412	26.0975	25.778	25.8996	25.7839	24.8961	NA	25.5374	NA	NA	NA	25.8345	26.2938	26.0396	25.7842	26.2406
A0A060WUV2	Cadherin-1	6	310.92	25.7394	25.7187	26.1995	26.2967	23.154	23.7796	23.7355	23.4891	24.7919	24.6855	23.4968	24.6433	25.0203	25.7207	25.7	26.1804	26.2776	NA	NA	NA	NA	24.7739	NA	NA	24.6254	NA	25.7207	25.632	25.7275	25.7	25.6737	25.7016	26.0824	26.1804	26.3671	25.9802	26.2776	26.6156	NA	NA	NA	24.8755	NA	NA	NA	24.218
A0A060XRC5	Inter-alpha-trypsin inhibitor heavy chain H3-like	18	323.31	29.7638	29.3662	30.225	28.8193	29.9387	29.3434	30.0771	28.9608	28.492	27.9353	28.3833	28.357	27.4254	29.7422	29.3448	30.2031	28.7983	29.9169	29.322	30.0552	28.9398	28.4713	27.915	28.3627	28.3364	27.4055	29.5315	29.7422	29.8257	29.3448	29.4763	29.1583	30.2693	29.9353	30.2031	28.7983	28.7513	28.8806	30.1103	29.9169	29.6464	29.4374	29.0481	29.322	29.7504	30.208
A0A060WUN3	Alpha-2-macroglobulin-like	12	323.31	32.6436	31.9284	32.2629	32.4823	32.7095	31.9666	32.5496	32.2538	30.5319	31.1669	31.7644	30.8314	30.4307	32.6198	31.9052	32.2395	32.4587	32.6857	31.9433	32.526	32.2304	30.5097	31.1442	31.7414	30.809	30.4086	32.703	32.6198	32.581	31.9462	31.8215	31.9052	32.2301	32.2395	32.2788	32.373	32.5138	32.4587	32.8419	32.6857	32.6233	32.0337	31.8527	31.9433	32.2959	32.8412
A0A060X9D3	Pigment epithelium-derived factor;SERPIN domain-containing protein, Serpin F1-like protein	8	144.14	24.3331	24.5853	24.5951	24.826	24.333	25.6212	25.687	23.9363	25.949	26.4509	26.3968	26.7764	25.1362	24.3154	NA	24.5772	24.808	24.3153	25.6026	25.6683	NA	25.9302	26.4317	26.3777	26.7569	25.1179	24.2837	24.3154	24.6311	NA	NA	24.3965	24.5772	24.9147	24.4442	24.6208	25.0169	24.808	NA	23.8734	24.7572	25.6416	25.6026	25.5695	25.748	25.6683
A0A060Y0R7	Ceruloplasmin;Plastocyanin-like domain-containing protein	6	127.59	25.3011	26.584	26.5813	26.8538	26.7515	26.8988	27.409	26.6122	28.1717	28.1294	27.7016	28.0172	27.549	25.2827	26.5647	26.562	26.8343	26.7321	26.8793	27.3891	26.5928	28.1512	28.109	27.6815	27.9968	27.529	24.9689	25.3379	25.2827	26.7884	26.5647	26.254	26.562	26.5477	26.8215	26.8343	26.6898	27.217	27.5564	26.7321	26.5579	27.0871	26.7891	26.8793	26.9729	27.519
A0A060WGU6	Angiotensin 1-10 (Angiotensin 1-4) (Angiotensin 1-5) (Angiotensin 1-7) (Angiotensin 1-8) (Angiotensin 1-9) (Angiotensin 2-8) (Angiotensin 3-8) (Angiotensin I) (Angiotensin II) (Angiotensin III) (Angiotensin IV) (Angiotensin-1) (Angiotensin-2) (Angiotensin-3) (Angiotensin-4) (Angiotensinogen) (Des-Asp[1]-angiotensin II) (Serpin A8)	21	323.31	28.2827	28.8436	28.9185	28.7465	29.3714	28.7679	29.3187	29.0685	30.7062	30.8938	29.9726	30.5205	29.8482	28.2621	28.8226	28.8975	28.7256	29.3501	28.747	29.2974	29.0474	30.6839	30.8714	29.9509	30.4983	29.8266	28.0783	28.2621	28.3669	28.8708	28.6805	28.8226	28.8975	28.8479	29.1447	28.7226	28.7256	29.0163	29.9444	29.3501	29.1175	28.6472	28.747	28.8868	29.0353	29.506
P0DMV4	Intelectin (RTInt)	7	178.18	24.1444	25.1769	24.1567	24.9858	24.3446	24.3832	25.0126	23.0745	26.4495	27.1304	25.8116	27.3136	26.0792	NA	NA	NA	24.9677	24.3269	24.3655	24.9944	NA	26.4303	27.1107	25.7928	27.2938	26.0603	NA	NA	NA	NA	NA	NA	NA	NA	NA	24.5803	24.9677	25.2313	23.8986	24.8028	24.3269	24.614	24.3655	24.2977	24.9944	24.9481
Q9PT14	Precerebellin-like protein	9	323.31	28.3897	28.5307	28.9116	29.8908	30.0911	28.9911	28.9319	29.5285	30.5271	31.2661	30.4228	31.1684	31.1629	28.3691	28.5099	28.8906	29.8691	30.0692	28.97	28.9109	29.5071	30.5049	31.2434	30.4007	31.1458	31.1402	28.4381	28.3634	28.3691	28.6165	27.7881	28.5099	28.8906	28.7712	28.9721	29.8777	29.8691	29.789	30.5507	30.0692	29.7516	28.97	29.0463	28.9234	28.7094	29.0011
P11941	Lysozyme C II (EC 3.2.1.17) (1,4-beta-N-acetylmuramidase C) (Lysozyme type II)	8	323.31	25.9447	25.7714	24.0237	27.5034	27.3506	25.4885	25.7712	26.9376	28.72	28.7043	27.4691	28.6579	27.5644	25.9259	25.7526	NA	27.4834	27.3308	25.47	25.7525	26.9181	28.6992	28.6835	27.4492	28.6371	27.5444	28.2205	25.9259	25.3958	25.7838	25.7215	NA	NA	NA	NA	27.4199	27.5774	27.4834	27.3308	27.5008	27.2127	25.3902	25.7906	25.47	25.8768	25.7525
A0A060VUA9	Triosephosphate isomerase (EC 5.3.1.1)	1	303.02	26.0026	25.5481	24.3566	24.9766	24.223	25.3817	23.357	24.191	27.2839	28.9107	29.102	27.1858	26.2869	25.9838	25.5295	NA	NA	NA	25.3632	NA	NA	27.2641	28.8897	29.0808	27.1661	26.2678	26.0007	25.9838	25.9838	25.8749	25.0407	25.5295	NA	NA	NA	NA	23.7068	NA	NA	NA	NA	24.4001	25.3632	25.4068	NA	NA
A0A060Z9B8	Catechol-O-methyltransferase domain-containing protein 1	7	310.43	23.8854	24.346	23.3844	26.0694	25.7484	24.7695	24.3698	24.7256	28.3641	27.5909	24.737	27.074	28.1599	NA	NA	23.3674	26.0504	25.7297	24.7515	24.3521	NA	28.3435	27.5709	24.719	27.0543	28.1395	NA	NA	NA	NA	NA	NA	NA	22.905	23.8298	26.1101	26.0504	26.0166	25.9106	25.7297	25.6891	24.313	25.4413	24.7515	24.2367	24.3922
A0A060WRB4	Actin-depolymerizing factor (Brevin) (Gelsolin)	6	156.04	23.1462	23.798	23.51	24.7147	24.7867	24.0022	22.5003	24.0515	26.14	28.4751	26.0308	26.9055	26.2579	NA	NA	NA	NA	NA	NA	NA	NA	26.1211	28.4544	26.0119	26.886	NA	NA	NA	NA	NA	NA	23.4492	NA	NA	NA	23.685	NA	NA	NA	NA	NA	NA	NA	NA	NA	NA
A0A060YST0	Apolipoprotein M-like	7	162.03	23.7126	24.8311	24.543	24.9588	23.5926	24.4533	24.0579	24.3045	26.8351	28.1958	28.4646	28.9223	26.6498	NA	NA	NA	NA	NA	NA	NA	NA	26.8156	28.1753	28.4439	28.9013	26.6304	NA	NA	NA	NA	NA	NA	NA	NA	NA	NA	NA	NA	NA	NA	NA	NA	NA	NA	NA	NA
A0A060Z9H8	Phosphoglycerate mutase (EC 5.4.2.11) (EC 5.4.2.4)	3	138.69	24.2976	24.5117	22.4122	23.8715	24.5307	23.9205	22.9334	23.3614	27.7902	28.3533	28.7647	26.8057	23.7698	NA	NA	NA	NA	NA	NA	NA	NA	27.77	28.3327	28.7438	26.7862	NA	NA	NA	NA	NA	NA	NA	NA	NA	NA	NA	NA	NA	NA	NA	NA	NA	NA	NA	NA	NA
A0A060WKG4	Creatine kinase (EC 2.7.3.2)	2	323.31	24.7531	23.6611	22.2138	23.9389	24.0181	23.1382	22.848	23.998	26.0794	28.0216	28.7798	26.1857	26.2158	NA	NA	NA	NA	NA	NA	NA	NA	26.0605	28.0013	28.7588	26.1667	NA	NA	NA	NA	NA	NA	NA	NA	NA	NA	NA	NA	NA	NA	NA	NA	NA	NA	NA	NA	NA
A0A060YXK5	Catechol-O-methyltransferase domain containing 1	5	202.35	24.5474	23.4766	24.0419	27.5589	28.0817	26.5773	23.5644	23.6399	29.0982	28.7759	27.2925	27.9703	28.6353	NA	NA	NA	27.5388	28.0613	26.558	NA	NA	29.0771	28.755	27.2726	27.95	28.6145	NA	NA	NA	NA	NA	NA	NA	NA	NA	27.5388	27.3071	27.8104	26.7955	28.0613	28.2555	25.9287	27.1306	26.558	NA	NA
Q9DFD5	Differentially regulated trout protein; CD59 glycoprotein-like; Phospholipase A2 inhibitor 31 kDa subunit-like	2	84.266	24.3707	25.3363	24.558	27.1846	26.5538	24.272	26.3801	23.9181	27.7935	29.8722	28.3543	30.1745	28.7975	NA	NA	NA	27.1649	26.5345	NA	26.3609	NA	27.7733	29.8505	28.3337	30.1525	28.7766	NA	NA	NA	NA	NA	NA	NA	NA	NA	27.1649	27.0554	27.3388	26.9762	26.5345	26.4557	NA	NA	NA	26.2319	26.3609
A0A060XKK4	Saxitoxin and tetrodotoxin-binding protein 2-like	6	116.41	26.3093	27.6296	23.3352	29.7494	29.4637	27.8587	29.4234	23.7061	30.632	30.344	30.5392	31.0173	29.6866	26.2902	27.6095	NA	29.7278	29.4423	27.8384	29.402	NA	30.6097	30.3219	30.517	30.9948	29.665	26.2407	26.3397	NA	27.7953	27.4627	27.6095	NA	NA	27.2853	29.7278	29.9435	29.4195	29.4668	29.4423	29.1292	27.861	NA	27.8159	29.3133	29.402
S0F2P2	Creatine kinase (EC 2.7.3.2)	6	323.31	26.5565	24.3862	23.2917	24.2959	23.2016	23.8512	23.236	23.6716	29.0167	29.9892	30.4029	27.0995	26.0468	26.5372	NA	NA	NA	NA	NA	NA	NA	28.9956	29.9675	30.3808	27.0798	26.0278	26.0881	26.5372	26.9873	NA	NA	NA	NA	NA	NA	NA	NA	NA	NA	NA	NA	NA	NA	NA	NA	NA
A0A060YWQ3	Enolase (EC 4.2.1.11)	4	323.31	26.7261	24.2056	25.7994	24.6823	23.4498	25.8728	25.7112	23.4046	28.0453	30.7393	31.1798	28.8583	27.6727	26.7067	24.188	25.7807	NA	NA	25.854	25.6925	NA	28.0249	30.717	31.1572	28.8373	27.6526	26.6711	26.7891	26.7067	24.8939	24.188	23.8479	25.7575	NA	25.8039	NA	NA	NA	26.1146	NA	NA	26.7147	24.9934	NA	25.552	25.8331
A0A060WUI1	Fructose-bisphosphate aldolase (EC 4.1.2.13)	8	323.31	27.9338	25.6986	23.2769	24.4459	23.6348	25.5594	24.7215	23.4617	29.258	30.8269	31.2609	28.8978	27.7684	27.9135	25.68	NA	NA	NA	25.5408	NA	NA	29.2368	30.8045	31.2382	28.8769	27.7482	27.9405	27.9135	27.8409	25.68	25.4182	26.1004	NA	NA	NA	NA	NA	NA	NA	NA	NA	25.2098	26.0067	25.5408	NA	NA
A0A060WHT8	Complement component C7-1	22	323.31	24.2269	23.9842	23.5519	24.084	22.989	24.6181	23.8299	23.769	28.3734	29.1924	28.1345	29.54	26.4785	NA	NA	NA	NA	NA	NA	NA	NA	28.3528	29.1712	28.1141	29.5185	26.4593	NA	NA	NA	NA	NA	NA	NA	NA	NA	NA	NA	NA	NA	NA	NA	NA	NA	NA	NA	NA
C1BG12	Leukocyte cell-derived chemotaxin 2	12	323.31	25.3098	24.5178	23.0146	28.5547	22.499	22.6956	24.3025	23.1056	29.5292	30.5673	29.7211	30.5532	29.3905	NA	NA	NA	28.534	NA	NA	NA	NA	29.5077	30.5451	29.6995	30.531	29.3692	NA	NA	NA	NA	NA	NA	NA	NA	NA	28.534	28.3454	28.8066	NA	NA	28.2374	NA	NA	NA	NA	NA
A0A060YZR6	Haptoglobin;Peptidase S1 domain-containing protein	11	323.31	24.3434	24.9031	27.5225	29.0625	29.0638	27.5301	28.7618	23.1469	30.7535	31.3766	31.4183	31.2527	31.0942	NA	NA	27.5025	29.0414	29.0427	27.5101	28.7409	NA	30.7311	31.3538	31.3955	31.23	31.0717	NA	NA	NA	NA	NA	NA	27.5025	27.5259	27.3529	29.0414	28.9982	29.0579	29.6788	29.0046	29.0427	27.7286	27.0129	27.5101	28.3176	28.892
A0A060XGG8	Haptoglobin;Peptidase S1 domain-containing protein	12	323.31	23.5671	25.6176	25.7389	27.791	27.8794	26.2152	26.668	24.2184	31.4974	30.7138	29.9674	30.1947	29.6553	NA	25.599	25.7202	27.7708	27.8591	26.1962	26.6487	NA	31.4745	30.6915	29.9457	30.1728	29.6338	NA	NA	NA	25.1638	25.599	25.6661	25.7202	25.6968	25.7798	27.6544	27.9738	27.7708	27.6039	27.9799	27.8591	26.0649	26.1962	26.2987	26.6487	26.8491
A0A060WXT1	Ig light chain (kappa ) precursor	1	49.74	28.4437	24.8648	25.2895	25.0581	26.409	26.6453	25.5859	26.5081	23.8611	23.7573	25.6763	25.215	23.4776	28.4231	NA	25.2711	NA	26.3899	26.6259	25.5673	26.4888	NA	NA	25.6577	25.1967	NA	29.392	28.4231	28.2341	NA	NA	26.5758	25.2711	25.6472	25.1975	NA	NA	24.8395	26.3899	26.5624	26.2449	26.259	26.6259	26.8783	NA	25.7132
P79899	Pentaxin (Pentraxin)	6	54.725	25.7001	24.8858	25.7283	25.3224	26.0691	25.4287	26.3701	25.992	25.2	24.3925	24.3659	23.8193	24.568	25.6814	24.8677	25.7096	25.304	26.0502	25.4102	26.3509	25.9731	NA	NA	NA	NA	NA	25.1961	25.6814	25.7008	NA	25.1025	24.633	25.5684	25.7096	25.9499	25.2399	25.304	25.4259	26.5809	26.0502	25.8801	25.8369	25.4102	25.3782	26.1771	26.4107
A0A060YZ84	Alpha-2-macroglobulin-like	10	318.06	28.8672	27.9441	27.9272	28.3751	29.2721	28.2058	28.8459	28.8108	27.8078	27.3831	27.643	27.895	28.0557	28.8463	27.9238	27.9069	28.3545	29.2509	28.1853	28.825	28.7899	27.7876	27.3632	27.6229	27.8747	28.0353	28.9246	28.8463	28.8176	27.8402	27.9238	27.9947	27.8743	28.2016	27.9069	28.3545	28.2856	28.5874	29.2509	29.3342	29.214	28.3273	28.1853	28.1679	28.6763	29.0631
A0A060X8X3	Complement factor B-like (Salmo trutta)	5	275.11	24.2863	24.6974	23.4857	24.4745	24.3784	23.5467	23.8503	24.1893	25.0626	25.178	25.5931	24.7344	25.2849	NA	NA	NA	NA	24.3607	NA	23.833	NA	25.0444	25.1597	25.5745	24.7164	NA	NA	NA	NA	NA	NA	NA	NA	NA	NA	NA	NA	NA	24.3607	24.5771	24.1893	NA	NA	NA	23.8369	23.833
A0A060WGR2	L-lactate dehydrogenase (EC 1.1.1.27)	2	156.18	23.2464	24.8806	23.0553	24.614	23.8177	24.1414	24.5729	23.79	25.9923	26.4664	25.853	25.9526	24.3701	NA	NA	NA	NA	NA	NA	NA	NA	25.9734	26.4471	25.8342	25.9337	NA	NA	NA	NA	NA	NA	NA	NA	NA	NA	NA	NA	NA	NA	NA	NA	NA	NA	25.6563	NA	NA
A0A060XLW3	Plastin-2; Lymphocyte cytosolic protein 1	3	266.75	24.5779	25.317	23.6485	24.4737	23.7198	23.1622	23.2211	24.7436	24.93	27.1104	25.0275	26.3813	25.1828	NA	25.2986	23.6313	NA	23.7026	NA	NA	NA	24.9119	27.0907	25.0093	26.3622	NA	NA	NA	NA	25.3654	NA	25.2319	23.7987	23.464	NA	NA	NA	23.7257	NA	24.0304	23.3748	23.3089	NA	NA	NA	NA
Q08G23	Cathelicidin antimicrobial peptide	3	41.669	23.9589	24.3286	23.4505	24.6725	24.5648	22.6834	21.2642	23.6307	24.9683	25.6897	24.5636	25.4707	25.1418	NA	NA	NA	NA	NA	NA	NA	NA	24.9501	25.6711	24.5458	25.4522	NA	NA	NA	NA	NA	NA	NA	NA	NA	NA	NA	NA	NA	NA	NA	NA	NA	NA	NA	NA	NA
C1BGU6	Lysozyme g (EC 3.2.1.17)	7	68.188	23.9352	25.1184	23.6109	25.1856	22.9577	23.4293	24.0291	22.5953	25.9277	25.6011	25.1242	25.4962	24.8592	NA	NA	NA	NA	NA	NA	NA	NA	25.9089	25.5825	25.1059	25.4777	NA	NA	NA	NA	NA	NA	NA	NA	NA	NA	NA	NA	NA	NA	NA	NA	NA	NA	NA	NA	NA
A0A060WC08	Phosphoglycerate kinase (EC 2.7.2.3)	4	157.93	24.9566	25.2029	24.2124	24.8926	24.685	24.6462	23.3585	23.582	26.1582	27.1722	27.9757	26.1792	24.7471	24.9385	NA	NA	NA	NA	NA	NA	NA	26.1392	27.1525	27.9553	26.1602	NA	24.8375	25.0394	NA	NA	NA	NA	NA	NA	NA	NA	NA	NA	NA	NA	NA	NA	NA	NA	NA	NA
A0A060VVE5	Fructose-bisphosphate aldolase (EC 4.1.2.13)	7	323.31	23.9473	24.4319	23.6391	24.2281	22.6913	23.6633	24.0512	23.9415	26.7455	27.5296	27.7335	23.8499	25.673	NA	NA	NA	NA	NA	NA	NA	NA	26.726	27.5096	27.7134	NA	25.6544	NA	NA	NA	NA	NA	NA	NA	NA	NA	NA	NA	NA	NA	NA	NA	NA	NA	NA	NA	NA
A0A060YWY3	Fibrinogen beta chain	3	72.066	25.0979	29.2876	24.1867	25.0914	23.7902	23.5114	23.6945	23.6609	26.3907	29.1784	25.2589	28.4237	24.4044	NA	29.2663	NA	25.0732	NA	NA	NA	NA	26.3716	29.1572	25.2405	28.403	NA	NA	24.6938	NA	29.2177	29.2663	29.3271	NA	NA	NA	25.1181	25.0283	NA	NA	NA	NA	NA	24.226	NA	NA	NA
Q90ZF1	Glyceraldehyde-3-phosphate dehydrogenase (EC 1.2.1.12)	7	323.31	27.4054	26.9052	23.7308	25.5314	23.4191	26.1348	23.1817	24.0072	26.8026	29.109	30.0003	27.0528	25.4965	27.3855	26.8856	NA	NA	NA	26.1158	NA	NA	26.7831	29.0878	29.9786	27.0332	25.478	27.3855	27.3285	27.467	27.1054	26.8856	26.7139	NA	NA	NA	25.2655	NA	NA	NA	NA	NA	26.158	26.1158	26.0252	NA	NA
A0A060XUK2	Fibrinogen gamma chain	20	323.31	27.1793	32.3186	24.3004	27.3574	24.3452	25.7477	24.472	23.4214	28.069	32.3923	28.9691	32.4574	26.4199	27.1596	32.2951	NA	27.3376	NA	25.729	24.4542	23.4044	28.0486	32.3687	28.948	32.4338	26.4008	27.3353	26.8101	27.1596	32.2951	32.228	32.4709	NA	NA	NA	27.3376	27.3332	27.7859	NA	NA	NA	25.5892	25.729	25.8253	24.445	25.0076
A0A060WE68	Nucleoside diphosphate kinase (EC 2.7.4.6)	7	264.64	28.5255	26.6293	23.112	24.5867	24.5765	24.4232	23.611	23.5338	29.8367	29.9608	31.4771	29.0508	25.6834	28.5048	26.61	23.0953	NA	NA	24.4054	23.5938	NA	29.815	29.9391	31.4542	29.0297	25.6648	28.5048	28.656	28.4907	26.61	26.7402	26.5202	23.1922	NA	22.9983	NA	NA	NA	NA	NA	NA	NA	24.0379	24.773	23.6719	NA
A0A060VM28	Prothrombin (EC 3.4.21.5) (Coagulation factor II)	7	323.31	30.1664	30.2876	30.3445	30.8368	30.8064	30.3993	31.2834	30.3044	30.6079	30.3802	29.8142	30.3641	30.2007	30.1445	30.2656	30.3225	30.8144	30.784	30.3772	31.2607	30.2824	30.5857	30.3581	29.7925	30.342	30.1788	30.0973	30.1445	30.183	30.3425	30.2656	30.2206	30.3196	30.3225	30.467	30.8149	30.8144	30.7401	30.952	30.784	30.6411	30.3772	30.3539	30.481	31.0998	31.5065
A0A060VWC6	Uncharacterized protein	13	323.31	27.9124	27.0615	27.3508	27.8695	24.1339	27.7681	28.4938	27.7898	27.0236	25.581	26.6927	27.1913	27.38	27.8921	27.0418	27.3309	27.8492	NA	27.7479	28.4731	27.7696	27.004	NA	26.6733	27.1716	27.3601	27.9582	27.859	27.8921	27.0418	26.5819	27.1015	27.6043	27.05	27.3309	27.8492	27.8419	27.8959	NA	NA	NA	28.288	27.7479	27.5548	28.2585	28.6131
A0A060VWW1	Uncharacterized protein	8	200.93	29.4087	29.3026	28.7113	28.1772	28.7905	28.8111	29.7373	29.522	27.7955	28.5184	28.0128	28.5462	27.6706	29.3873	29.2814	28.6904	28.1568	28.7696	28.7902	29.7157	29.5006	27.7753	28.4977	27.9924	28.5254	27.6505	29.3873	29.3836	29.5607	29.5058	29.2395	29.2814	28.6904	28.671	28.7871	28.1568	28.2714	27.9204	29.5989	28.7696	28.447	28.7092	28.7902	28.9594	29.3279	29.8397
A0A060VXZ0	Prothrombin (EC 3.4.21.5) (Coagulation factor II)	8	211.39	25.8913	26.0473	26.7774	26.8027	26.4903	26.1567	27.4481	26.5701	26.2922	26.7848	26.4157	27.5497	26.6696	25.8725	26.0284	26.758	26.7832	26.4711	26.1377	27.4282	26.5508	26.2731	26.7653	26.3965	27.5297	26.6502	25.8473	25.8725	26.1668	26.0747	26.0179	26.0284	26.7954	26.4862	26.758	26.7832	26.5547	26.9125	27.1823	26.4711	26.1676	26.9217	25.9516	26.1377	27.3396	27.8496
A0A060VZH2	Anaphylatoxin-like domain-containing protein	20	323.31	23.7184	24.0634	27.9473	26.8942	26.6746	26.8995	27.4365	25.3357	28.5388	30.2997	28.0217	29.9342	23.2659	NA	NA	27.927	26.8747	26.6553	26.88	27.4166	NA	28.5181	30.2777	28.0013	29.9125	NA	24.1786	NA	NA	NA	NA	NA	28.2477	27.7327	27.927	26.9129	26.8068	26.8747	26.6548	26.6557	NA	26.8639	26.88	27.0001	27.4166	27.6281
A0A060W1F1	Uncharacterized protein	4	65.355	29.7028	24.6516	28.1729	30.7238	30.3623	28.0933	28.2265	29.9456	30.8499	29.897	28.4839	28.409	30.4027	29.6812	NA	28.1524	30.7015	30.3403	28.0729	28.206	29.9238	30.8275	29.8753	28.4633	28.3883	30.3806	29.9647	29.6812	29.6795	NA	NA	30.174	28.135	29.5573	28.1524	30.3696	30.7015	30.9454	NA	30.7544	29.9262	27.5883	NA	28.5574	28.1136	28.4501
A0A060W2L1	Olfactomedin-like domain-containing protein	8	148.68	25.5556	26.0293	26.157	25.0798	25.7376	26.0531	26.1391	25.4108	26.1295	26.1565	26.1514	25.2609	25.7425	25.5371	26.0104	26.138	25.0615	25.7189	26.0341	26.1201	25.3923	26.1105	26.1375	26.1325	25.2426	25.7238	25.6907	25.5371	25.3401	26.0104	25.7097	26.043	26.462	26.138	25.9611	25.0615	25.0284	25.5143	26.1089	25.4786	25.7189	26.3656	26.0341	25.8555	25.5743	26.2005
A0A060W2S2	Apolipoprotein A-I-2	27	323.31	33.9355	33.8486	33.5783	33.3265	30.8276	34.1667	34.1637	33.7734	34.1627	33.647	33.6496	33.5199	32.8627	33.9108	33.824	33.5539	33.3023	30.8052	34.1419	34.1389	33.7489	34.1379	33.6226	33.6251	33.4955	32.8388	33.922	33.8331	33.9108	33.8446	33.7588	33.824	33.5539	33.3364	33.5592	33.2946	33.3023	33.4041	31.3614	30.8052	30.6563	34.4547	34.1419	34.1195	33.9308	34.3204
A0A060W2U3	Lipocln_cytosolic_FA-bd_dom domain-containing protein	1	265.46	25.8292	26.7873	24.6862	26.1206	23.4065	25.5807	25.2341	23.9808	25.0115	26.3925	25.6103	26.2204	26.4268	25.8105	26.7678	24.6682	26.1016	NA	25.5621	25.2158	NA	NA	26.3733	25.5917	26.2013	26.4076	26.6059	25.8105	25.6255	27.1616	26.7678	26.6949	NA	25.0708	24.2657	26.085	26.1016	26.2819	24.4318	NA	NA	NA	25.8436	25.2807	24.639	25.3488
A0A060W3H4	apolipoprotein B-100-like; DUF1943 domain-containing protein	21	133.77	25.6111	23.0269	24.3929	24.9015	24.3197	24.0334	24.6271	23.5478	24.9184	23.7452	23.7624	23.1008	23.7354	25.5925	NA	24.3752	24.8834	24.3021	NA	24.6092	NA	NA	NA	NA	NA	NA	25.7096	25.2228	25.5925	NA	NA	NA	NA	24.0377	24.7126	24.9188	24.8834	24.2922	24.4017	NA	24.2024	NA	NA	NA	24.4949	24.9622
A0A060W748	LRRCT domain-containing protein	7	180.52	28.5933	28.6165	28.4457	28.6317	29.044	28.9055	28.7527	28.5064	29.9315	29.7154	29.0815	29.4497	29.0485	28.5725	28.5957	28.425	28.6109	29.0229	28.8845	28.7318	28.4857	29.9097	29.6939	29.0603	29.4283	29.0274	28.6803	28.5725	28.5141	28.4127	28.5957	28.6578	28.4624	28.425	28.3775	28.5738	28.6109	28.6486	29.3124	29.0229	28.9377	28.9347	28.8845	28.1604	28.7318	28.6265
A0A060W7E7	Vitellogenin domain-containing protein	109	323.31	29.9201	27.9576	28.0361	29.1227	24.3961	28.2219	28.9475	29.9992	28.1335	24.9182	26.8062	27.7198	23.6993	29.8984	27.9373	28.0157	29.1015	NA	28.2014	28.9265	29.9774	28.1131	24.9001	26.7867	27.6997	23.682	29.8984	30.0537	29.7882	28.0734	27.9373	27.7273	27.9336	28.0626	28.0157	28.9972	29.1015	29.1318	NA	NA	NA	28.2014	27.967	28.2042	28.772	29.067
A0A060W7T7	Uncharacterized protein	17	282.31	26.3017	26.4708	26.936	26.3079	26.7408	26.7795	27.3046	26.7154	27.0413	26.7549	26.4729	27.1323	26.159	26.2826	26.4516	26.9165	26.2888	26.7214	26.7601	27.2848	26.696	27.0217	26.7354	26.4537	27.1126	26.14	26.2826	26.342	26.2786	26.5862	26.3849	26.4516	26.9165	26.8677	27.0915	26.23	26.4574	26.2888	26.9908	26.7214	26.4577	26.8838	26.7328	26.7601	26.9666	27.3803
A0A060W917	Uncharacterized protein	12	216.09	28.6544	28.7127	28.4464	27.9985	27.7722	29.0967	29.1261	28.7965	28.16	28.5135	28.4719	28.4523	27.5456	28.6335	28.6918	28.4258	27.9781	27.752	29.0756	29.1049	28.7756	28.1396	28.4928	28.4512	28.4316	27.5256	28.6047	28.6335	28.6454	28.9188	28.6918	28.6359	28.1933	28.4305	28.4258	27.8882	27.9781	28.0326	27.752	27.8988	27.731	29.2172	29.0709	29.0756	28.9173	29.213
A0A060WAQ6	Uncharacterized protein	3	175.29	26.7409	26.6203	26.311	27.634	27.0014	27.2369	26.6292	27.3575	26.5161	28.0749	27.1386	27.6582	27.8989	26.7214	26.601	26.2919	27.6139	26.9818	27.2171	26.6099	27.3376	26.4968	28.0545	27.1189	27.6381	27.8787	26.7214	27.1711	26.7074	26.0755	27.1014	26.601	26.2919	27.0892	26.0464	27.1645	27.658	27.6139	26.5921	27.5195	26.9818	27.2357	27.2171	27.2037	26.2037	26.9784
A0A060WCI5	Uncharacterized protein	8	95.506	26.9876	27.2815	26.3895	27.8695	27.5755	27.3243	28.0043	27.5765	24.2049	27.9084	25.8773	26.8967	27.1177	26.968	27.2617	26.3703	27.8492	27.5555	27.3044	27.9839	27.5565	NA	27.8881	25.8585	26.8772	27.098	27.0626	26.968	26.9309	27.2617	27.3843	27.2193	26.3703	26.5917	26.3616	27.685	28.0339	27.8492	27.53	27.6432	27.5555	27.7132	27.2387	27.3044	27.6606	27.9839
A0A060WCY0	Carboxylic ester hydrolase (EC 3.1.1.-)	16	299.24	27.3779	26.8074	27.2741	26.7353	26.9402	27.6472	27.5868	27.2257	27.1556	26.9236	26.8471	27.494	26.7657	27.358	26.788	27.2543	26.7159	26.9207	27.6271	27.5667	27.2059	27.1359	26.904	26.8276	27.474	26.7463	27.3938	27.3519	27.358	26.8532	26.788	26.5963	26.9605	27.2543	27.4241	26.7159	26.7143	26.7413	26.9821	26.9207	26.6804	27.4497	27.7067	27.6271	27.2073	27.6394
A0A060WFS6	Apolipoprotein H (Beta-2-glycoprotein 1) (Beta-2-glycoprotein I)	7	147.68	29.1364	27.8851	29.0907	28.516	30.2455	29.4229	29.8573	28.5697	23.5486	29.4136	29.1861	29.424	28.1707	29.1152	27.8649	29.0695	28.4953	30.2235	29.4016	29.8356	28.549	NA	29.3922	29.1649	29.4026	28.1502	29.2295	29.1152	28.9955	27.8649	27.7165	27.9652	29.1815	28.9124	29.0695	28.4735	28.7429	28.4953	30.4275	30.2235	30.0557	29.5981	29.0894	29.4016	29.6178	30.0651
A0A060WFW3	Complement factor B-like	3	323.31	27.3272	27.3798	26.6825	27.0898	27.452	29.722	27.1328	27.5416	28.1393	27.8549	28.0582	27.9092	27.8139	27.3073	27.3599	26.6631	27.0701	27.4321	29.7005	27.1131	27.5216	28.1189	27.8347	28.0378	27.8889	27.7937	27.5104	27.3073	27.2177	27.3599	27.4649	27.3001	26.6145	26.6631	26.7119	27.0701	27.3365	27.0492	27.3082	27.4626	27.4321	29.6297	29.7005	29.8695	27.1131	27.037
A0A060WHC7	Clusterin	9	185.17	26.2324	26.276	24.924	24.6845	25.039	24.5226	26.8185	24.9598	23.9686	24.8131	24.5	23.5933	24.2627	26.2134	26.2569	24.9059	24.6666	25.0208	NA	26.799	24.9417	NA	NA	NA	NA	NA	26.2134	26.0775	26.4851	26.3296	26.1659	26.2569	24.9059	24.6265	25.0045	24.6666	24.6166	25.0295	24.6403	25.0208	25.1075	24.9823	NA	NA	26.6859	27.017
A0A060WHF0	Activation peptide (EC 3.4.21.7) (Plasmin heavy chain A) (Plasmin heavy chain A, short form) (Plasmin light chain B) (Plasminogen)	22	323.31	29.5373	29.3165	29.7665	29.871	29.7188	29.6801	30.2473	29.4631	30.3074	30.6783	29.9856	30.581	29.837	29.5158	29.2952	29.7449	29.8493	29.6972	29.6586	30.2253	29.4417	30.2854	30.656	29.9639	30.5588	29.8153	29.5158	29.6081	29.4117	29.3868	29.2952	29.2552	29.8031	29.6642	29.7449	29.711	29.8493	29.8581	29.6972	30.0329	29.6218	29.7575	29.6491	29.6586	30.1217	30.4043
A0A060WJ96	NTR domain-containing protein	32	323.31	28.0001	29.5784	29.7763	29.5486	30.0996	29.1986	28.2085	29.7142	27.9635	29.4266	29.4806	29.1228	28.7387	27.9797	29.5569	29.7547	29.5272	30.0777	29.1774	28.188	29.6926	27.9432	29.4052	29.4592	29.1017	28.7179	27.8453	28.0504	27.9797	29.5569	29.6406	29.4465	29.7736	29.7527	29.7547	29.5272	29.4328	29.6229	30.2411	30.0777	29.8489	29.2965	29.1774	28.9987	28.188	28.6564
A0A060WJB1	B30.2/SPRY domain-containing protein	16	323.31	29.7761	30.273	29.0926	30.2296	30.3749	29.7715	29.0434	30.2824	30.4842	29.6462	28.3036	28.6866	29.1742	29.7544	30.251	29.0715	30.2076	30.3528	29.7499	29.0223	30.2604	30.462	29.6247	28.283	28.6658	29.153	29.9701	29.7544	29.5966	30.2526	30.2035	30.251	29.0715	29.4133	28.9782	30.2069	30.2076	30.386	30.0798	30.4166	30.3528	29.5811	29.7547	29.7499	28.6813	29.1077
A0A060WN18	Uncharacterized protein (Fragment)	2	32.152	29.1337	29.2371	29.054	30.0557	29.4281	29.0507	30.2717	29.9053	24.4696	28.7995	28.7045	29.1546	25.0762	29.1125	29.2158	29.0329	30.0339	29.4067	29.0296	30.2497	29.8836	NA	28.7786	28.6836	29.1334	NA	29.1125	28.9917	29.1699	29.2129	29.4095	29.2158	29.0329	28.9106	29.2	29.895	30.0339	30.0584	29.5502	29.4067	29.3038	NA	28.9532	29.1059	30.2092	30.4504
A0A060WN38	A2M_N_2 domain-containing protein	10	323.31	27.619	27.4834	27.7142	27.8132	26.8536	27.8576	28.3649	27.7408	27.1688	27.6976	27.5215	27.7384	27.3194	27.5989	27.4634	27.694	27.793	26.8341	27.8374	28.3443	27.7206	27.1491	27.6774	27.5015	27.7182	27.2995	27.3301	27.5989	27.7809	27.0638	27.5122	27.4634	27.694	27.498	27.9227	27.793	27.7262	27.8289	27.8272	26.8341	26.7955	27.8797	27.7646	27.8374	28.3102	28.551
A0A060WQM5	Anaphylatoxin-like domain-containing protein	17	323.31	27.4313	29.073	28.3946	28.667	28.9934	28.1487	27.1585	28.7944	27.2761	28.8298	28.8321	28.0884	25.9386	27.4114	29.0519	28.374	28.6462	28.9724	28.1283	27.1388	28.7735	27.2563	28.8088	28.8111	28.068	25.9198	27.4561	27.4114	27.2513	29.0805	28.9273	29.0519	28.1425	28.441	28.374	28.6462	28.6754	28.5852	28.9724	29.1944	28.9656	27.9573	28.1476	28.1283	26.9469	27.2849
A0A060WRW9	MG1 domain-containing protein	3	60.256	23.4249	24.285	27.9515	24.4063	28.368	24.3353	23.2447	27.1948	24.5705	27.6752	27.62	27.4771	24.1007	NA	NA	27.9312	NA	28.3474	NA	NA	27.175	NA	27.6551	27.6	27.4571	NA	NA	NA	NA	NA	NA	NA	28.0859	27.8426	27.9312	NA	NA	NA	28.9469	28.3474	28.0952	27.9364	NA	NA	NA	NA
A0A060WX05	Uncharacterized protein	2	218.75	25.91	26.0675	27.0174	26.4939	26.9253	27.1139	26.4358	23.9346	24.3055	26.3209	25.4058	26.1006	24.3148	25.8912	26.0486	26.9978	26.4746	26.9058	27.0942	26.4166	NA	NA	26.3018	25.3873	26.0817	NA	25.918	25.8912	25.718	26.2465	25.8507	NA	26.2802	27.0566	26.9978	26.4746	25.8825	26.8599	NA	26.8655	26.946	27.0942	26.1448	27.3087	25.7737	26.5927
A0A060WX26	SERPIN domain-containing protein	8	147.17	26.9246	27.0898	25.9421	25.2983	27.442	26.8579	25.7866	23.584	24.7695	26.878	27.1209	26.1494	23.6347	26.905	27.0702	25.9233	NA	27.422	26.8384	25.7679	NA	NA	26.8585	27.1012	26.1304	NA	26.6125	26.9659	26.905	27.4042	27.0702	27.0563	25.9233	25.8711	26.051	NA	26.9081	NA	26.9091	27.4848	27.422	26.0427	27.1827	26.8384	NA	25.7918
A0A060WX77	SERPIN domain-containing protein	8	323.31	27.2343	27.7777	26.7092	26.0849	26.9271	27.2218	26.637	27.9122	25.6057	27.3653	26.9851	26.8144	26.3256	27.2145	27.7575	26.6898	26.0659	26.9075	27.2021	26.6177	27.8919	25.5871	27.3455	26.9655	26.7949	26.3065	27.2145	27.2106	27.3183	27.5834	27.7886	27.7575	26.1581	26.6898	27.1361	25.6533	26.1706	26.0659	26.4689	27.346	NA	27.2021	26.864	27.3362	26.6177	26.7546
A0A060WXK2	Uncharacterized protein	14	323.31	30.553	30.8412	30.827	30.2488	30.9038	30.8774	31.4039	31.2265	30.146	30.0914	30.453	30.8121	30.6359	30.5308	30.8188	30.8046	30.2268	30.8814	30.855	31.3811	31.2038	30.1241	30.0696	30.4309	30.7897	30.6136	30.5308	30.4888	30.5727	30.9147	30.6134	30.8188	30.8063	30.7018	30.8046	30.2268	30.2241	30.2379	30.9435	30.8814	30.5181	30.9599	30.8214	30.855	31.0842	31.7065
A0A060WZY4	Uncharacterized protein	2	212.41	28.9688	29.3806	27.52	29.2065	27.4095	29.2496	28.3506	29.3571	27.6302	27.8283	27.8495	27.583	28.7456	28.9478	29.3593	27.5	29.1853	27.3896	29.2284	28.33	29.3358	27.6101	27.8081	27.8293	27.563	28.7247	29.1391	28.9478	28.9002	29.4196	29.0924	29.3593	27.4812	27.5	27.586	29.2103	28.9359	29.1853	27.2536	27.6564	27.3896	28.6893	29.2579	29.2284	28.33	28.3763
A0A060X083	Ig-like domain-containing protein	6	323.31	28.8124	23.3333	23.0214	24.2356	28.0379	28.7969	27.7797	27.7658	24.2231	26.9458	25.0979	27.7446	24.2879	28.7915	NA	NA	NA	28.0176	28.776	27.7595	27.7456	NA	26.9263	NA	27.7244	NA	28.7915	28.7605	29.1293	NA	NA	NA	NA	NA	NA	NA	NA	NA	28.0421	27.716	28.0176	28.7051	28.776	29.0403	NA	27.6102
A0A060X0D1	Uncharacterized protein	17	323.31	29.2532	28.6137	28.9007	28.8494	29.0047	28.933	29.3332	28.7727	27.2123	28.0942	28.5509	28.777	28.3191	29.232	28.5929	28.8797	28.8284	28.9837	28.912	29.3119	28.7518	27.1925	28.0738	28.5302	28.7561	28.2986	29.1562	29.232	29.2982	28.6788	28.5929	28.4965	28.83	28.9049	28.8797	28.8284	29.0025	28.6644	29.1903	28.9837	28.8777	28.912	28.8396	28.9778	29.2172	29.4619
A0A060X2P7	Christmas factor (EC 3.4.21.22) (Coagulation factor IX) (Coagulation factor IXa heavy chain) (Coagulation factor IXa light chain)	12	114.59	25.525	25.9072	26.1351	25.8059	25.6282	26.516	27.033	25.3209	24.7488	25.7034	25.6552	25.75	25.4079	25.5065	25.8883	26.1161	25.7872	25.6096	26.4967	27.0133	25.3026	24.7309	25.6847	25.6365	25.7313	25.3895	25.0951	25.5065	25.858	26.091	25.8883	25.8378	26.0866	26.1161	26.2603	25.8074	25.7872	25.7453	26.3304	25.6096	25.4952	26.4127	26.5654	26.4967	26.8979	27.0133
A0A060X309	Integrin beta	10	323.31	28.8268	28.9328	28.7259	26.7069	27.0899	27.974	28.8289	27.951	26.4816	26.5913	28.2706	28.7401	27.5689	28.8059	28.9118	28.7051	26.6875	27.0702	27.9536	28.808	27.9307	26.4624	26.572	28.2501	28.7192	27.5489	29.0445	28.74	28.8059	28.9931	28.9118	28.8929	28.7051	28.3929	28.8288	26.6875	26.6708	27.0721	27.2041	27.0702	26.254	28.3495	27.9536	27.7472	28.7005	28.8188
A0A060X339	Uncharacterized protein (Fragment)	8	77.294	24.4407	24.2471	24.6134	24.5892	25.3268	23.1066	24.2563	24.33	25.6079	25.6344	23.9892	24.9955	24.2023	NA	NA	24.5955	24.5713	25.3084	NA	24.2387	NA	25.5893	25.6158	NA	24.9774	NA	NA	NA	NA	NA	NA	NA	24.7462	NA	24.4448	24.4812	24.5713	24.6262	25.5943	25.0226	NA	NA	NA	NA	NA	24.3711
A0A060X7U1	Uncharacterized protein	7	127.74	23.3754	25.0396	24.1527	24.5035	24.7528	24.2317	25.1854	24.3028	24.7181	24.7203	24.1577	24.8937	24.4942	NA	NA	24.1352	NA	24.7348	24.2141	25.1671	24.2851	24.7001	24.7023	NA	24.8756	24.4764	NA	NA	23.7878	NA	NA	NA	24.009	24.1352	24.3428	NA	24.1752	NA	24.9522	24.7348	24.5465	24.3081	24.2141	23.9872	25.1039	25.3442
A0A060X8D9	Olfactomedin-like domain-containing protein	14	323.31	26.9513	26.752	26.5303	26.7863	26.3344	26.7158	26.5548	26.2226	26.2521	27.3807	26.8995	26.2787	26.205	26.9317	26.7326	26.511	26.7668	26.3153	26.6964	26.5356	26.2036	26.2331	27.3608	26.8799	26.2596	26.186	26.9317	26.8874	27.0742	26.7326	26.5639	26.814	26.2058	26.511	26.7601	26.6118	26.7668	26.7768	NA	26.5247	26.1059	26.4315	26.6964	26.8499	26.4642	27.1244
A0A060X960	SERPIN domain-containing protein	16	323.31	27.766	27.9787	27.8366	28.1489	28.4529	27.3008	28.0098	23.2937	27.9729	28.8687	27.9311	28.5468	28.128	27.7459	27.9583	27.8163	28.1285	28.4322	27.281	27.9894	NA	27.9526	28.8478	27.9108	28.526	28.1076	27.7459	27.6052	27.7518	28.1981	27.9583	27.8015	27.8163	27.6292	27.8492	28.0431	28.1477	28.1285	28.5091	28.4322	27.9729	27.3525	27.2078	27.281	27.9894	28.0911
A0A060XA94	Uncharacterized protein	5	323.31	30.3362	29.5015	29.8257	30.4939	28.9709	30.1029	30.5449	29.7836	29.5468	28.0832	28.8432	29.7142	28.8426	30.3142	29.48	29.8041	30.4718	28.9499	30.081	30.5227	29.7619	29.5254	28.0628	28.8223	29.6926	28.8216	30.3142	30.2039	30.5099	29.758	29.48	29.458	29.8041	29.7672	29.9903	30.3932	30.6336	30.4718	29.4051	28.9499	28.7854	30.2034	30.081	29.7704	30.4121	30.7964
A0A060XAE5	Complement component C9	3	323.31	30.2083	30.3856	30.1565	30.9056	30.3052	30.7015	30.7008	30.8059	31.3341	31.3732	30.7853	31.296	31.4738	30.1863	30.3635	30.1346	30.8832	30.2832	30.6792	30.6785	30.7836	31.3114	31.3505	30.7629	31.2733	31.4509	30.1268	30.1863	30.2376	30.4754	30.3635	30.2038	30.1346	30.0613	30.234	30.8832	30.8494	30.915	30.4925	30.2832	30.1466	30.522	30.6792	30.6835	30.476	30.8753
A0A060XBB9	Adenylate kinase isoenzyme 1 (AK 1) (EC 2.7.4.3) (EC 2.7.4.6) (ATP-AMP transphosphorylase 1) (ATP:AMP phosphotransferase) (Adenylate monophosphate kinase) (Myokinase)	1	56.066	24.489	24.093	24.1434	23.5357	23.9713	24.7501	25.004	23.5692	25.9305	26.0899	26.7289	24.8527	23.6575	NA	NA	NA	NA	NA	NA	NA	NA	25.9117	26.071	26.7095	24.8346	NA	NA	NA	NA	NA	NA	NA	NA	NA	NA	NA	NA	NA	NA	NA	NA	NA	NA	NA	NA	NA
A0A060XCX2	Uncharacterized protein	2	25.82	25.6341	24.8637	23.1134	24.0875	24.2237	25.6037	23.6353	25.7931	23.4617	25.1592	25.5052	25.307	24.5676	25.6155	NA	NA	NA	NA	25.5851	NA	25.7744	NA	25.1409	25.4866	25.2886	NA	25.6155	25.4201	25.8344	NA	NA	NA	NA	NA	NA	NA	NA	NA	NA	NA	NA	25.5257	25.5851	25.6406	NA	25.6582
A0A060XE72	VWFA domain-containing protein	11	279.38	28.1953	28.2976	28.5036	28.1309	28.826	28.4294	28.9826	27.9776	28.0851	27.3743	27.3144	27.5873	27.1248	28.1748	28.2771	28.4829	28.1105	28.8051	28.4087	28.9616	27.9573	28.0647	27.3544	27.2946	27.5673	27.1051	28.3306	28.1154	28.1748	28.3782	28.2771	28.1716	28.4154	28.4829	28.5776	28.0216	28.245	28.1105	28.9199	28.8051	28.5115	28.341	28.4087	28.4532	28.7952	29.032
A0A060XEG1	Hemopexin	26	323.31	33.2919	33.4815	33.2182	33.1963	33.4845	33.651	34.0532	33.1029	33.6496	34.0042	33.4388	33.9846	33.1832	33.2677	33.4572	33.1941	33.1722	33.4602	33.6265	34.0284	33.0789	33.6251	33.9795	33.4145	33.9599	33.1591	33.2193	33.2677	33.3707	33.4656	33.3299	33.4572	33.1941	33.0186	33.2911	33.1184	33.1722	33.2537	33.7139	33.4602	33.2469	33.7661	33.5798	33.6265	33.8733	34.2519
A0A060XHI9	Uncharacterized protein	16	177.88	26.3524	26.7847	26.5532	26.4054	27.0338	26.6542	27.2868	26.0691	26.397	26.424	26.5582	25.8118	26.0997	26.3332	26.7653	26.5339	26.3862	27.0141	26.6348	27.2669	26.0501	26.3779	26.4048	26.539	25.793	26.0807	26.5383	26.3332	26.2978	26.7757	26.7653	26.3286	26.4625	26.5339	26.7021	26.3862	26.4599	26.2007	27.0882	27.0141	26.4522	26.9754	26.6348	26.6031	27.1652	27.421
A0A060XIK2	Ig-like domain-containing protein	2	194.81	28.471	28.7892	28.8623	27.3565	28.8056	29.0388	28.3021	27.9987	28.1016	28.0917	28.9112	28.4432	24.1048	28.4503	28.7683	28.8413	27.3366	28.7847	29.0177	28.2815	27.9783	28.0811	28.0713	28.8902	28.4226	NA	28.4503	28.4267	28.6798	NA	28.9703	28.5663	28.8535	28.7248	28.8413	27.216	27.4572	NA	28.5826	28.8564	28.7847	29.0993	28.7641	29.0177	28.219	28.7798
A0A060XKA1	Cystatin fetuin-A-type domain-containing protein	11	323.31	31.7334	31.1533	31.0077	30.5897	30.2877	31.6651	31.8363	31.3668	30.3738	30.5128	30.8947	30.8938	30.4016	31.7104	31.1307	30.9851	30.5675	30.2657	31.6421	31.8132	31.344	30.3517	30.4906	30.8722	30.8714	30.3795	31.7036	31.7104	31.722	31.1307	31.2972	31.0636	30.8444	30.9991	30.9851	30.5675	30.6142	30.5131	30.4949	30.2657	30.0181	31.6344	31.6421	31.6601	31.8132	31.9553
A0A060XMR6	MACPF domain-containing protein	18	306.07	28.0599	27.8944	27.838	28.3772	27.4014	28.288	27.7246	27.8447	26.9329	27.6845	28.1283	27.9093	27.5991	28.0395	27.8742	27.8178	28.3566	27.3815	28.2675	27.7045	27.8245	26.9133	27.6644	28.1079	27.889	27.5791	28.1693	28.0395	27.9961	27.7565	27.9655	27.8742	27.6438	27.9	27.8178	28.238	28.3609	28.3566	27.3815	27.3525	27.5941	28.0086	28.2675	28.3787	27.5658	28.0444
A0A060XMW3	Lipocln_cytosolic_FA-bd_dom domain-containing protein	2	133.89	27.5277	27.2682	26.8304	27.1861	27.1015	27.4146	26.6319	26.5057	28.078	27.3518	27.1177	27.2474	26.503	27.5077	27.2484	26.811	27.1664	27.0818	27.3946	26.6125	26.4865	28.0576	27.332	27.098	27.2276	26.4838	27.5891	27.5077	27.2169	27.8583	27.2484	27.2264	27.0452	26.811	26.5532	27.317	26.9629	27.1664	27.3126	27.0818	26.6102	27.6159	27.3946	27.2417	26.5789	26.693
A0A060XN19	Uncharacterized protein	14	323.31	30.375	29.6668	29.4211	29.5542	29.7091	29.5497	29.8579	29.8895	30.1176	29.7242	29.2443	29.2159	29.4156	30.3529	29.6452	29.3997	29.5327	29.6876	29.5282	29.8362	29.8678	30.0957	29.7026	29.2231	29.1947	29.3943	30.4387	30.2396	30.3529	29.6452	29.6862	29.4552	29.3997	29.4702	29.3994	29.414	29.5327	29.6272	29.7337	29.6876	29.5439	29.5058	29.5566	29.5282	29.5929	30.1686
A0A060XNR6	Uncharacterized protein	7	323.31	31.7866	30.1244	30.5911	31.2532	26.4904	31.0491	30.901	31.4221	29.3994	29.8594	30.5998	30.3415	30.2391	31.7635	30.1025	30.5689	31.2305	26.4712	31.0266	30.8785	31.3992	29.3781	29.8377	30.5776	30.3194	30.2171	31.7981	31.6893	31.7635	30.2123	30.0315	30.1025	30.5887	30.4881	30.5689	31.2433	31.2305	31.2243	26.1108	26.5414	26.4712	31.1296	30.9834	31.0266	30.8183	31.0651
A0A060XNS8	Uncharacterized protein	9	134.46	25.5477	25.4981	25.7441	26.8093	25.2451	26.075	26.0426	26.7222	25.6968	25.9707	24.3416	26.0268	26.47	25.5291	25.4796	25.7254	26.7898	25.2268	26.0561	26.0237	26.7028	25.6781	25.9518	NA	26.0079	26.4508	25.5376	25.2681	25.5291	25.5123	NA	25.4469	25.5759	25.7254	26.0348	26.6715	26.8099	26.7898	25.3035	NA	25.1501	26.0561	26.0069	26.1131	26.0237	26.2025
A0A060XPE1	Anaphylatoxin-like domain-containing protein	47	323.31	30.4751	30.6357	30.5836	31.0577	31.067	30.7116	30.7683	30.7535	30.7169	31.0749	30.3873	30.4759	31.0022	30.453	30.6135	30.5614	31.0351	31.0444	30.6893	30.746	30.7311	30.6946	31.0523	30.3652	30.4538	30.9797	30.5071	30.453	30.4262	30.7567	30.5384	30.6135	30.5897	30.5563	30.5614	30.9637	31.0351	31.1169	31.1581	31.0444	30.9219	30.4568	30.6893	30.6932	30.5472	30.9346
A0A060XPI6	Uncharacterized protein	4	81.43	28.1296	27.5528	28.833	27.8969	27.4396	28.9121	29.0022	27.8293	24.9459	24.6636	27.5328	27.9824	26.6221	28.1092	27.5328	28.8121	27.8766	27.4196	28.8911	28.9811	27.8091	NA	NA	27.5128	27.9621	26.6028	28.3159	28.1092	28.0033	27.3446	27.5328	27.5511	28.8815	28.2037	28.8121	27.9678	27.8766	27.259	28.3694	27.4176	27.4196	28.8911	28.694	29.02	28.9811	29.1515
A0A060XSJ5	GLOBIN domain-containing protein	4	323.31	30.1005	28.9353	30.2052	28.5331	31.1159	28.8777	27.9718	27.2983	28.0045	27.018	29.392	28.7728	28.8852	30.0786	28.9143	30.1833	28.5123	31.0933	28.8567	27.9515	27.2785	27.9842	26.9984	29.3706	28.7519	28.8642	30.328	30.0734	30.0786	28.9143	29.2049	28.8893	30.1833	30.1636	30.6178	28.5123	28.4081	28.7888	31.9258	31.0933	30.9182	29.5851	28.6092	28.8567	27.9515	27.3026
A0A060XSW8	Uncharacterized protein	48	323.31	30.9267	31.5583	31.8484	31.7336	31.9549	30.7827	31.8092	31.1963	31.7022	32.2666	30.72	31.5257	31.4604	30.9042	31.5354	31.8253	31.7106	31.9317	30.7604	31.786	31.1736	31.6792	32.2432	30.6977	31.5028	31.4376	31.1213	30.8925	30.9042	31.6896	31.4727	31.5354	31.8253	31.707	31.8541	31.7325	31.7096	31.7106	32.051	31.9317	31.6851	30.7081	30.7604	30.869	31.6981	32.0506
A0A060XTF5	Uncharacterized protein	9	323.31	24.8994	27.3629	28.1449	27.6243	28.3556	28.1545	28.303	27.8932	29.4554	29.2859	28.9647	29.4903	28.2026	NA	27.3431	28.1244	27.6042	28.335	28.134	28.2825	27.8729	29.434	29.2646	28.9436	29.4689	28.1822	NA	NA	26.1108	27.5758	27.0895	27.3431	28.1244	28.0206	28.3376	27.6118	27.6042	27.3321	28.8944	28.335	28.1135	28.468	28.092	28.134	28.2825	28.4782
A0A060XUR3	Uncharacterized protein	4	105.6	28.4746	27.1658	28.2051	28.0501	24.0555	27.8574	28.7692	28.2982	24.0706	27.4762	27.819	28.1151	27.4633	28.4539	27.1461	28.1846	28.0297	NA	27.8372	28.7483	28.2776	NA	27.4563	27.7988	28.0946	27.4434	28.3365	28.4558	28.4539	27.122	27.1461	27.1622	28.1019	28.1846	28.4055	27.8886	28.0297	28.2352	NA	NA	NA	28.598	27.7907	27.8372	28.5677	28.8368
A0A060XVF4	Uncharacterized protein	7	323.31	30.5929	30.9255	31.8152	32.0076	31.7337	30.7056	30.8033	31.4037	31.4027	31.8073	31.6348	32.3798	32.1844	30.5707	30.903	31.7921	31.9844	31.7106	30.6833	30.7809	31.3809	31.3799	31.7842	31.6118	32.3563	32.1611	30.6847	30.5707	30.4889	30.831	30.903	31.02	31.7991	31.5097	31.7921	32.1195	31.9616	31.9844	32.0396	31.7106	31.6247	30.8534	30.6833	30.669	30.7007	30.8278
A0A060XWP2	SERPIN domain-containing protein	9	106.54	25.0211	26.1097	25.3704	26.092	26.1881	24.7176	25.6194	25.7933	25.6863	24.8705	26.0624	25.821	25.7443	25.0029	26.0907	25.352	26.0731	26.1691	24.6996	25.6008	25.7745	25.6676	24.8524	26.0434	25.8023	25.7256	24.8901	25.0343	25.0029	26.2018	26.0907	26.0283	25.6725	25.352	25.2163	25.9419	26.0731	26.2266	26.4127	26.1691	26.1449	24.8116	24.6996	24.6541	25.3885	25.6036
A0A060XWS9	SERPIN domain-containing protein	7	87.357	23.7197	24.713	24.6207	24.0414	25.0768	24.0959	23.5685	24.585	23.6897	23.7761	23.6127	23.0124	24.8342	23.7025	24.695	24.6029	24.0239	25.0585	24.0784	23.5514	24.5672	NA	NA	23.5956	22.9957	NA	23.7308	23.6743	NA	24.695	24.4725	25.0237	24.7146	24.5148	24.6029	23.847	24.1277	24.0239	25.0649	24.971	25.0585	24.1906	24.0784	23.9795	23.5514	23.5916
A0A060XWZ8	Uncharacterized protein	19	323.31	27.9403	27.8589	29.0239	28.4476	29.1257	28.3241	29.0731	28.65	26.6392	28.3079	27.8599	28.5259	27.8565	27.92	27.8387	29.0028	28.4269	29.1045	28.3035	29.052	28.6292	26.6198	28.2873	27.8396	28.5051	27.8363	27.7344	27.92	28.0449	27.9702	27.8387	27.7239	29.0028	28.9602	29.1825	28.4139	28.4926	28.4269	29.5815	29.1045	28.7725	28.4392	28.3035	28.2237	28.8711	29.1793
A0A060XXG0	Uncharacterized protein	7	323.31	31.0387	30.1286	29.8911	30.0055	31.23	30.5043	29.7738	30.2354	31.7923	31.2069	30.4525	30.8285	29.2086	31.0161	30.1067	29.8694	29.9837	31.2073	30.4822	29.7522	30.2134	31.7692	31.1842	30.4303	30.8061	29.1874	31.0146	31.0161	31.0941	30.1515	30.0767	30.1067	29.8694	29.8179	29.9224	29.9837	30.1558	29.9021	31.2222	31.2073	31.102	30.2473	30.4822	30.6079	29.5367	29.7522
A0A060XYF3	Ig-like domain-containing protein	5	141.83	29.0462	28.0012	27.9217	26.55	27.3059	28.5555	28.2816	27.7547	27.5911	27.6884	28.0558	27.8766	27.8217	29.0251	27.9809	27.9014	26.5307	27.2861	28.5347	28.261	27.7346	27.571	27.6683	28.0354	27.8564	27.8015	29.0251	28.9845	29.0532	27.9809	27.9265	28.2005	27.9014	27.8558	28.2226	26.4857	26.6058	26.5307	27.4866	27.2072	27.2861	28.1918	28.8363	28.5347	27.8514	28.261
A0A060XZ25	GLOBIN domain-containing protein	1	323.31	29.6064	28.9819	29.0344	28.602	30.5544	28.5344	26.9856	26.8817	26.5676	26.1188	28.5461	27.3585	28.1222	29.5849	28.9609	29.0133	28.5812	30.5323	28.5136	26.966	26.8622	26.5483	26.0998	28.5254	27.3386	28.1018	29.5574	29.6909	29.5849	28.9609	29.1438	28.9512	28.8862	29.0133	29.1967	28.5343	28.5812	28.7512	30.6779	30.5323	30.296	28.5869	28.338	28.5136	26.6423	26.966
A0A060Y1K2	Uncharacterized protein	2	28.439	23.8055	27.1133	27.5851	27.4448	28.5794	27.2377	28.8671	26.658	24.2501	28.0426	27.6117	27.5976	24.7222	NA	27.0936	27.5651	27.4249	28.5587	27.2179	28.8461	26.6387	NA	28.0223	27.5916	27.5776	NA	26.1928	NA	NA	NA	27.0391	27.1482	27.5651	27.4773	27.8632	27.4551	27.4249	26.8693	28.5587	28.4384	28.6422	27.9255	26.8667	27.2179	28.8461	29.0065
A0A060Y244	Uncharacterized protein	2	99.95	31.5406	28.7923	28.504	29.2404	28.7514	27.8345	28.7535	31.2651	27.6224	27.6524	27.641	28.7664	29.3157	31.5177	28.7713	28.4833	29.2192	28.7305	27.8143	28.7326	31.2424	27.6023	27.6323	27.621	28.7455	29.2944	31.648	31.5177	30.7963	28.7713	29.2676	28.0808	28.7104	28.4833	28.3024	29.2613	28.9698	29.2192	27.6864	28.882	28.7305	27.326	27.8492	27.8143	27.6652	28.7625
A0A060Y2D3	Uncharacterized protein	4	77.363	29.4221	29.1013	29.4593	28.6866	29.0062	29.8877	29.2542	28.7172	27.7299	24.2749	28.4717	29.0791	24.9864	29.4007	29.0802	29.4379	28.6657	28.9851	29.866	29.2329	28.6963	27.7098	NA	28.4511	29.058	NA	29.5861	29.4007	29.3693	29.1955	29.0802	28.8961	29.4101	29.5672	29.4379	28.6657	28.5375	28.7189	NA	28.8947	29.0756	29.866	29.4508	29.9057	28.7653	29.2388
A0A060Y2D6	F5/8 type C domain-containing protein	6	239.65	27.4611	28.0745	28.2106	26.9129	26.9049	28.1995	27.9089	26.5171	27.2596	25.8684	25.3435	27.1423	25.1391	27.4411	28.0541	28.1902	26.8933	26.8854	28.179	27.8887	26.4979	27.2398	25.8496	25.3251	27.1226	NA	27.5052	26.9783	27.4411	28.0721	27.9219	28.0541	28.2567	28.1793	28.1902	27.572	26.7891	26.8933	26.9491	26.8659	26.8854	27.9811	28.5416	28.179	27.8887	28.1894
A0A060Y462	Ig-like domain-containing protein	4	260.24	26.2871	27.3685	23.4339	25.7425	24.8143	23.8517	26.9558	22.5607	24.9993	27.4455	25.0651	23.578	25.9344	26.268	27.3486	NA	25.7238	NA	NA	26.9362	NA	NA	27.4256	NA	NA	NA	26.1307	26.4054	NA	27.2786	27.3486	27.3708	NA	NA	NA	25.7394	25.4129	25.7238	NA	NA	NA	NA	NA	NA	26.8226	26.9362
A0A060Y4C1	Ectonucleotide pyrophosphatase/phosphodiesterase family member 2-like	3	115.58	24.1076	24.7418	23.8523	25.1135	23.9522	24.2614	24.5042	23.4553	24.5674	24.5983	24.3342	23.9616	24.5338	24.0901	NA	23.8349	NA	23.9348	24.2438	24.4864	NA	NA	NA	NA	NA	NA	24.007	24.2966	24.0901	NA	NA	NA	23.6144	24.0554	NA	NA	24.3333	NA	24.0447	NA	23.825	24.0619	NA	24.4257	24.4864	24.4969
A0A060Y4F1	Uncharacterized protein	11	100.5	25.6765	24.3207	26.8971	25.8969	26.29	25.638	26.0949	22.8473	25.7344	25.1605	25.1664	25.2585	24.7214	25.6578	NA	26.8775	25.8781	26.2709	25.6194	26.0759	NA	25.7157	25.1422	NA	25.2402	NA	25.6578	25.0702	25.7417	NA	NA	NA	26.8775	26.3629	26.9022	25.8781	25.9092	25.8253	26.57	26.2709	26.2212	25.2577	25.6194	25.9044	26.0329	26.0759
A0A060Y572	Glucose-6-phosphate isomerase (EC 5.3.1.9)	10	129.65	24.0837	24.0437	24.3978	24.789	24.827	24.1538	23.4478	24.0006	25.7939	26.0581	26.3343	24.8598	23.5965	NA	NA	NA	NA	NA	NA	NA	NA	25.7752	26.0392	26.3152	24.8418	NA	NA	NA	NA	NA	NA	NA	NA	NA	NA	NA	NA	NA	NA	NA	NA	NA	NA	NA	NA	NA
A0A060Y5T9	Fetuin B	19	323.31	33.1248	33.0711	32.8779	32.5357	32.8559	33.2172	33.0319	33.2767	32.5308	32.4776	31.8946	32.8036	32.4184	33.1007	33.0471	32.854	32.5121	32.832	33.1931	33.0079	33.2525	32.5071	32.454	31.8715	32.7798	32.3949	33.1584	33.05	33.1007	33.1557	32.8841	33.0471	32.6722	32.9895	32.854	32.5121	32.4446	32.6797	32.832	33.1676	32.8092	32.9098	33.2113	33.1931	32.8695	33.2971
A0A060Y5Z9	SMB domain-containing protein	7	70.233	24.3329	24.2428	24.5739	25.0573	25.4912	24.9787	25.4898	24.6668	24.3393	24.7208	24.1984	24.6062	24.627	24.3152	NA	24.556	25.0391	25.4727	24.9605	25.4713	24.6488	24.3216	24.7028	24.1809	24.5883	24.6091	24.3152	23.9459	24.3871	25.1107	NA	NA	24.6042	24.4409	24.556	25.0391	24.9713	25.2086	25.4727	25.5736	25.3115	25.1984	24.8479	24.9605	25.2892	25.7871
A0A060Y683	A2M_recep domain-containing protein (Fragment)	10	212.48	27.124	27.2075	26.8301	27.6137	27.2647	27.0636	27.1095	27.8201	28.2658	27.8697	26.788	26.8252	28.3187	27.1043	27.1877	26.8106	27.5937	27.2449	27.0439	27.0898	27.7999	28.2453	27.8495	26.7686	26.8057	28.2981	27.1456	27.1043	27.0523	27.1877	27.2013	27.1328	26.8106	26.9753	26.5826	27.5613	27.5937	27.6748	27.4668	27.2449	26.9679	26.8387	27.0439	27.3018	26.9754	27.2051
A0A060Y7H2	Uncharacterized protein	17	323.31	28.3344	27.9123	28.3214	27.8315	23.3984	28.3044	28.6468	27.5813	29.8332	28.2498	28.4995	28.206	28.8879	28.3139	27.892	28.3008	27.8113	NA	28.2838	28.626	27.5613	29.8115	28.2293	28.4788	28.1855	28.8669	28.3285	28.225	28.3139	27.6784	27.9678	27.892	28.2343	28.3008	28.3102	27.8113	27.8281	27.6669	NA	NA	NA	28.7293	28.269	28.2838	28.428	28.8176
A0A060Y9M1	Serotransferrin	4	323.31	34.5837	34.511	34.3055	34.715	34.9775	34.6919	34.8283	34.2726	34.6645	35.043	34.5437	34.7939	34.6684	34.5586	34.4859	34.2806	34.6898	34.9521	34.6667	34.803	34.2477	34.6393	35.0175	34.5186	34.7686	34.6432	34.5586	34.5271	34.5856	34.5115	34.4859	34.3591	34.1284	34.2828	34.2806	34.5246	34.6901	34.6898	35.0207	34.9521	34.7782	34.7017	34.5926	34.6667	34.6605	35.0849
A0A060Y9S3	Uncharacterized protein	17	323.31	28.0304	28.3209	29.0039	28.5217	29.1139	28.7297	28.9389	28.2237	27.9215	27.7373	27.8043	27.861	28.0874	28.0101	28.3003	28.9828	28.501	29.0928	28.7088	28.9179	28.2032	27.9013	27.7172	27.7841	27.8407	28.067	28.0352	27.9731	28.0101	28.7498	27.9692	28.3003	28.6508	28.9828	28.9896	28.7677	28.501	28.3419	28.9635	29.2661	29.0928	28.7088	28.739	28.6833	28.8039	28.9179
A0A060YBS8	Uncharacterized protein	3	188.02	23.8477	28.5367	27.0724	24.5744	28.974	28.5401	28.0014	27.746	28.6179	28.8126	24.7868	27.8367	26.5401	NA	28.516	27.0528	NA	28.9529	28.5194	27.9811	27.7258	28.5971	28.7917	NA	27.8165	26.5208	NA	NA	NA	28.5074	28.5928	28.516	26.8715	27.0528	27.1388	NA	NA	NA	28.6835	29.0781	28.9529	28.7538	28.3432	28.5194	27.6459	28.1374
A0A060YC43	Uncharacterized protein	5	101.86	26.2459	26.7073	26.3625	26.4871	26.9027	26.9175	26.6296	26.2477	24.8717	25.2421	25.5443	25.7925	26.4621	26.2269	26.6879	26.3434	26.4679	26.8832	26.898	26.6103	26.2286	NA	25.2237	25.5258	25.7738	26.4429	25.9636	26.3064	26.2269	27.1567	26.6785	26.6879	26.3249	26.3434	26.7098	26.4679	26.2713	26.6073	27.0294	26.8679	26.8832	26.7136	27.1468	26.898	26.5143	27.3706
A0A060YCI1	Uncharacterized protein	2	184.03	27.0804	26.3728	26.4199	27.0802	26.487	26.8271	27.3846	26.7217	26.706	26.6911	26.2899	26.3746	26.6503	27.0607	26.3536	26.4008	27.0605	26.4678	26.8076	27.3647	26.7023	26.6866	26.6717	26.2708	26.3554	26.631	27.0809	26.9041	27.0607	26.3536	26.2291	26.9472	26.4008	26.1506	26.5897	27.0605	27.028	27.2206	26.1039	26.4729	26.4678	26.647	26.8076	27.0201	27.0672	27.6967
A0A060YD01	Uncharacterized protein (Fragment)	10	323.31	28.9784	28.9876	29.0138	29.1678	29.0836	28.7084	29.4451	28.9685	28.9938	27.7378	27.7556	28.2621	28.4115	28.9574	28.9666	28.9927	29.1466	29.0625	28.6876	29.4237	28.9474	28.9727	27.7176	27.7354	28.2416	28.3908	28.9574	29.0383	28.9022	28.9677	28.9666	28.8333	28.7541	28.9953	28.9927	29.0718	29.1466	29.2015	29.1477	29.0625	28.7191	28.8692	28.6876	28.5646	29.2244	29.6402
A0A060YD33	CaMKII_AD domain-containing protein (Fragment)	2	201.09	26.096	26.6741	26.6398	24.4552	22.9611	26.8	26.876	26.3946	24.3354	25.3267	24.6594	23.9132	26.2468	26.077	26.6548	26.6205	NA	NA	26.7805	26.8565	26.3754	NA	NA	NA	NA	26.2278	26.2867	26.0493	26.077	26.6957	26.5174	26.6548	26.498	26.6205	26.9368	NA	NA	NA	NA	NA	NA	26.7805	26.8848	26.4308	26.5763	27.1155
A0A060YDK5	Ig-like domain-containing protein	2	73.325	26.8902	28.6174	25.2103	24.45	27.8596	27.361	24.7372	23.6896	24.0951	27.0086	26.9659	26.4439	24.1949	26.8706	28.5966	25.192	NA	27.8394	27.3412	NA	NA	NA	26.989	26.9464	26.4247	NA	27.0595	26.7922	26.8706	28.5966	28.6299	28.4172	NA	26.1493	24.2346	NA	NA	NA	26.2541	28.3534	27.8394	26.5326	27.3412	28.4085	NA	NA
A0A060YDR3	Complement component 8 subunit beta (Complement component C8 beta chain)	18	323.31	28.1232	27.8573	28.6759	28.059	28.0039	28.2632	29.1706	28.1385	28.4095	28.0917	27.9773	28.2308	27.7251	28.1027	27.837	28.655	28.0386	27.9836	28.2427	29.1494	28.1181	28.3889	28.0713	27.9569	28.2103	27.7049	28.1478	28.1027	27.9222	27.8343	28.1365	27.837	28.655	28.4466	28.6692	27.9591	28.0386	28.0934	28.4723	27.9836	27.7173	28.5542	28.0195	28.2427	28.9896	29.4191
A0A060YET5	Ig-like domain-containing protein	2	290.05	25.9837	26.0369	26.5133	24.457	26.5942	26.4762	26.0975	23.7915	23.6253	25.3753	27.4865	26.1164	24.4452	25.9648	26.018	26.494	NA	26.5748	26.457	26.0785	NA	NA	25.3569	27.4666	26.0974	NA	25.9682	25.9614	NA	26.377	25.8385	26.018	26.5243	26.1932	26.494	NA	NA	NA	26.7851	26.5748	26.1587	26.9068	26.457	26.2305	NA	26.1904
A0A060YG41	Uncharacterized protein	13	308.01	27.0089	27.0496	27.7616	27.5427	28.6178	28.2938	27.5352	27.4589	27.2416	28.2409	28.4409	27.4637	28.5383	26.9893	27.03	27.7415	27.5227	28.597	28.2732	27.5152	27.4389	27.2218	28.2204	28.4202	27.4437	28.5176	26.3383	27.0424	26.9893	27.03	27.3627	26.8697	27.7398	27.8971	27.7415	27.2072	27.5227	27.5351	28.7211	28.597	28.3168	28.1093	28.6227	28.2732	27.5152	27.6227
A0A060YH37	Uncharacterized protein	29	323.31	29.313	29.5502	29.2459	29.6377	29.8432	29.5655	29.0679	29.5883	29.154	29.0098	27.9135	28.4591	28.6675	29.2917	29.5287	29.2246	29.6161	29.8216	29.544	29.0467	29.5668	29.1328	28.9887	27.8932	28.4385	28.6467	29.2667	29.2917	29.2947	29.7418	29.5287	29.497	29.196	29.2246	29.2709	29.6396	29.5949	29.6161	29.8216	30.0118	29.8016	29.1862	29.5819	29.544	28.9336	29.2248
A0A060YJ35	Ig-like domain-containing protein	3	157.66	23.7193	26.705	24.1451	24.9161	27.3906	27.395	25.8064	23.5625	24.0185	25.2287	26.1882	26.0181	24.6495	NA	26.6856	NA	NA	27.3707	27.3751	25.7876	NA	NA	NA	26.1692	25.9993	NA	NA	NA	NA	26.7322	26.6856	26.4697	25.2562	NA	NA	NA	NA	NA	27.5099	26.8414	27.3707	27.0196	27.3751	27.5836	25.5081	25.7876
A0A060YJ80	Ig-like domain-containing protein	2	166.7	29.2101	27.8198	28.0461	27.4061	28.8688	29.3344	27.9761	27.2632	28.1093	27.7437	28.0416	28.5409	24.4304	29.1889	27.7996	28.0258	27.3862	28.8478	29.3131	27.9558	27.2434	28.0889	27.7236	28.0212	28.5202	NA	29.1889	29.2224	29.1142	27.4933	27.7996	27.8448	28.0934	27.7385	28.0258	27.2984	27.5766	27.3862	28.6005	28.9172	28.8478	28.8686	29.3131	29.3604	28.1631	27.8489
A0A060YKA6	VWFA domain-containing protein	8	207.65	23.7748	26.4588	22.4699	24.2325	26.4735	24.3118	27.0582	23.0228	25.9865	25.9118	26.1105	26.2059	23.6373	NA	26.4395	NA	NA	26.4542	NA	27.0385	NA	25.9677	25.893	26.0916	26.1869	NA	NA	NA	NA	26.4395	26.5891	25.9018	NA	NA	NA	NA	NA	NA	26.734	26.4542	26.4406	NA	NA	NA	27.0522	27.0385
A0A060YLA8	Apolipoprotein C Ib	6	61.303	28.8556	28.2361	27.8445	28.4382	28.546	23.7073	23.8012	28.7634	30.41	28.4672	23.352	29.1771	23.2373	28.8346	28.2156	27.8242	28.4175	28.5253	NA	NA	28.7425	30.3879	28.4466	NA	29.1559	NA	28.8346	28.4813	29.0539	28.3754	28.0558	NA	27.8242	28.7047	27.7997	28.4175	28.3771	28.9685	28.5253	28.6519	28.4568	NA	28.7749	NA	NA	27.8821
A0A060YM30	Sushi domain-containing protein	6	183.48	27.6386	25.7401	28.5746	27.3224	24.6705	27.9549	27.2224	27.262	28.2665	28.2956	24.3405	29.5397	27.951	27.6186	25.7214	28.5538	27.3026	NA	27.9346	27.2027	27.2422	28.2459	28.2751	NA	29.5182	27.9307	27.5633	27.9224	27.6186	NA	25.5231	25.9197	28.5795	28.1853	28.5538	27.2173	27.3026	27.7913	NA	27.3449	NA	28.4712	27.9036	27.9346	27.1942	NA
A0A060YM51	Uncharacterized protein	6	298.42	26.5874	25.9384	26.199	25.9495	27.1848	26.7383	26.7492	26.2957	26.909	25.9051	26.0819	26.5509	26.6013	26.5681	25.9195	26.18	25.9306	27.165	26.7188	26.7298	26.2766	26.8895	25.8863	26.063	26.5316	26.582	26.7758	26.5594	26.5681	25.9616	25.8157	25.9195	26.3394	25.9942	26.18	25.9306	25.9059	26	27.6352	27.1512	27.165	26.9661	26.7188	26.2531	26.7116	26.8421
A0A060YNF5	Myosin motor domain-containing protein (Fragment)	0	323.31	24.9779	24.7522	24.1652	25.0138	23.6096	23.5241	23.7179	24.3644	26.9428	30.1032	29.1707	23.9887	24.5901	NA	NA	NA	NA	NA	NA	NA	NA	26.9232	30.0813	29.1495	23.9712	NA	NA	NA	NA	NA	NA	NA	NA	NA	NA	NA	NA	NA	NA	NA	NA	NA	NA	NA	NA	NA
A0A060YP37	GLOBIN domain-containing protein	3	323.31	33.2758	32.629	32.7244	32.4161	34.1452	32.0897	30.8005	30.337	30.045	30.438	32.4731	31.3515	31.9312	33.2516	32.6053	32.7006	32.3926	34.1204	32.0664	30.7781	30.315	30.0231	30.4159	32.4495	31.3288	31.908	33.2516	33.238	33.2537	32.7245	32.58	32.6053	32.704	32.6338	32.7006	32.307	32.4401	32.3926	34.2198	34.1204	33.9141	32.0664	31.9115	32.0903	30.2851	30.8583
A0A060YPN6	Lumican	4	170.71	27.0022	27.1201	26.4472	26.3663	24.3295	26.492	26.9151	26.4965	27.4637	27.3797	26.8833	27.2662	26.8939	26.9826	27.1004	26.428	26.3472	NA	26.4727	26.8956	26.4773	27.4437	27.3598	26.8637	27.2464	26.8744	27.0772	26.9826	26.9251	27.1004	27.0679	27.2183	26.1091	26.6406	26.428	26.3448	26.3472	26.5592	NA	NA	NA	26.446	26.4727	26.5405	26.8956	26.8864
A0A060YQ40	Uncharacterized protein	9	100.11	25.0209	24.8563	23.2828	24.213	23.745	25.0471	25.3174	24.8422	24.0593	24.5639	24.8914	24.9639	23.8413	25.0027	NA	NA	NA	NA	25.0289	25.299	24.8241	NA	24.546	24.8733	24.9458	NA	24.9698	25.1573	25.0027	NA	NA	NA	NA	NA	NA	NA	24.7795	NA	NA	NA	NA	25.0289	24.9395	25.108	25.299	24.9879
A0A060YQ67	Complement factor H-like; coagulation factor XIII B chain-like	8	306.02	26.6382	26.7367	27.5836	26.9383	27.5035	28.6846	27.8882	27.6626	27.2848	28.2731	27.6616	27.3857	26.7972	26.6189	26.7173	27.5635	26.9187	27.4835	28.6638	27.8679	27.6425	27.265	28.2526	27.6415	27.3659	26.7777	26.6618	26.6189	26.53	27.3956	26.7173	26.1297	27.824	27.4984	27.5635	27.6688	26.8826	26.9187	28.2953	27.4377	27.4835	28.1616	29.1394	28.6638	27.8679	28.1074
A0A060YRG9	Fibronectin type-I domain-containing protein	5	130.4	26.814	27.1859	27.0606	27.7721	27.2156	26.9292	27.6434	26.5462	27.601	27.5392	26.6737	27.1471	25.9778	26.7945	27.1662	27.0409	27.752	27.1958	26.9097	27.6233	26.5269	27.581	27.5192	26.6543	27.1274	25.9589	26.6998	26.9589	26.7945	27.1792	27.1116	27.1662	26.3711	27.0409	27.0963	27.5289	27.752	28.0227	26.6207	27.2215	27.1958	26.9294	26.9097	26.7113	27.6233	27.3261
A0A060YRH9	Apolipoprotein H (Beta-2-glycoprotein 1) (Beta-2-glycoprotein I)	5	111.9	27.0877	27.039	27.0577	27.2741	27.7542	27.5411	27.3945	26.9863	24.9037	27.7257	27.6417	27.5339	26.8822	27.068	27.0194	27.038	27.2542	27.7341	27.5211	27.3746	26.9667	NA	27.7056	27.6216	27.5139	26.8627	27.475	27.068	27.0565	27.0194	26.8989	27.0239	27.2772	26.9103	27.038	27.6758	27.2542	27.0464	27.9706	27.6123	27.7341	27.5211	27.2241	27.7858	27.3128	27.3746
A0A060YSA7	Uncharacterized protein (Fragment)	19	323.31	28.6268	29.0904	28.4664	29.2946	28.3835	29.0198	28.6569	28.4239	29.3712	29.0879	28.5645	28.7587	28.3051	28.606	29.0693	28.4458	29.2733	28.3628	28.9987	28.6361	28.4032	29.3498	29.0668	28.5437	28.7378	28.2845	28.8053	28.606	28.5423	29.0886	28.9866	29.0693	28.2881	28.4458	28.4803	29.2851	29.2733	29.2729	28.0603	28.3628	28.4096	28.4677	29.1138	28.9987	28.4427	28.6361
A0A060YSH4	Uncharacterized protein	19	323.31	29.1316	29.8617	29.3133	29.2967	29.8567	30.0299	29.9717	29.5453	29.4611	29.5651	28.8978	29.3218	29.6875	29.1104	29.84	29.2921	29.2754	29.835	30.0081	29.95	29.5238	29.4397	29.5436	28.8768	29.3005	29.666	29.5015	29.0636	29.1104	30.2572	29.84	29.4793	29.3448	29.2806	29.2921	29.4089	29.2754	29.2436	30.0775	29.835	29.638	29.8749	30.0081	30.0642	29.8621	30.2346
A0A060YSX4	A2M_recep domain-containing protein (Fragment)	20	323.31	26.9476	24.9506	26.3277	28.0534	26.4941	27.2264	26.8055	27.8846	28.527	27.2906	24.38	27.0085	27.9992	26.928	NA	26.3085	28.033	26.4749	27.2067	26.786	27.8643	28.5063	27.2707	NA	26.9889	27.9788	26.9612	26.8053	26.928	NA	NA	NA	26.5528	26.27	26.3085	28.0252	28.0911	28.033	26.6946	26.4749	26.3584	26.8315	27.3283	27.2067	26.786	27.1198
A0A060YTC6	Anaphylatoxin-like domain-containing protein	6	45.863	26.4983	27.2819	26.9548	28.7652	27.2804	27.4596	27.0084	27.8333	27.8594	28.2398	26.4799	27.757	28.1763	26.479	27.262	26.9352	28.7443	27.2606	27.4396	26.9888	27.8131	27.8391	28.2192	26.4606	27.7369	28.1558	27.0852	26.479	26.4343	27.262	27.5769	26.9955	26.9352	27.6746	26.8761	28.7443	28.7612	28.1163	26.9933	27.8492	27.2606	27.2741	27.4396	27.8707	26.364	27.0265
A0A060YV53	Peptidase S1 domain-containing protein	8	323.31	29.2348	28.9094	28.9031	28.809	28.7299	29.2538	28.8203	28.7795	29.5201	29.2228	28.865	29.1444	28.6379	29.2136	28.8884	28.8821	28.788	28.7091	29.2326	28.7994	28.7586	29.4986	29.2016	28.844	29.1232	28.6171	29.2136	29.2255	29.0451	29.6677	28.8884	28.6225	29.1046	28.7603	28.8821	28.788	28.7339	28.9907	28.895	28.7091	28.6434	28.9441	29.4578	29.2326	28.7994	29.167
A0A060YV80	Uncharacterized protein	3	73.788	27.1899	27.4369	26.3262	27.8399	26.1467	27.3272	27.1944	26.4702	25.0351	26.8193	26.8352	26.8266	23.8696	27.1702	27.417	26.3071	27.8197	26.1277	27.3074	27.1747	26.4509	NA	26.7998	26.8158	26.8071	NA	27.2146	26.9394	27.1702	26.9802	27.417	28.6394	26.6974	26.1785	26.3071	27.9737	27.8197	27.4512	26.6242	26.1277	25.9227	26.9722	27.3074	27.8056	27.1747	27.5336
A0A060YVB2	Cytosolic malate dehydrogenase (EC 1.1.1.37) (Malate dehydrogenase, cytoplasmic)	7	78.178	24.8226	23.9747	24.407	24.151	24.5223	25.0746	24.925	23.7653	25.2811	25.5957	26.082	26.0718	24.5531	24.8046	NA	24.3893	NA	NA	25.0564	24.9069	NA	25.2628	25.5771	26.0631	26.0529	NA	24.7583	24.8508	NA	NA	NA	NA	NA	24.2775	24.5011	NA	NA	NA	NA	NA	NA	25.1473	NA	24.9654	NA	25.117
A0A060YXV0	Uncharacterized protein	1	113.36	24.8196	25.4508	24.7501	25.38	24.8829	25.4781	25.2017	24.0525	24.5941	25.7322	25.001	25.3766	25.6884	24.8016	25.4323	24.7321	25.3616	24.8648	25.4596	25.1834	NA	24.5763	25.7135	24.9829	25.3581	NA	24.8656	24.8016	24.6693	25.4758	25.3888	NA	24.5781	24.7321	24.8787	25.2319	25.4119	25.3616	24.492	24.9383	24.8648	25.1335	25.4596	25.7057	24.9637	25.4836
A0A060YY24	Lumican	8	293.21	29.2322	29.1371	29.4678	29.3837	28.6526	29.6721	30.2481	29.3547	30.6658	30.6039	29.8826	30.4706	29.4274	29.211	29.116	29.4464	29.3623	28.6318	29.6505	30.2261	29.3334	30.6435	30.5817	29.8609	30.4485	29.406	29.4829	29.1379	29.211	29.0203	29.1187	29.116	29.4464	28.9797	29.4634	29.3266	29.3623	29.3754	29.4137	28.2879	28.6318	29.685	29.2724	29.6505	29.8265	30.2439
A0A060YZ76	Apolipoprotein H (Beta-2-glycoprotein 1) (Beta-2-glycoprotein I)	7	128.4	24.7841	25.1864	25.4225	26.1219	26.1814	26.2529	26.0369	25.919	26.3042	25.8114	25.2836	25.9882	25.6889	24.7661	25.1681	25.4041	26.1029	26.1624	26.2338	26.018	25.9002	26.2851	25.7926	25.2652	25.9693	25.6702	24.7661	24.8031	24.6304	25.1681	25.1208	25.5413	25.5076	25.3857	25.4041	26.1029	25.7721	26.5954	26.5122	26.1624	25.9487	26.139	26.2545	26.2338	25.8272	26.3216
A0A060Z062	Ig-like domain-containing protein	2	81.137	28.1935	28.3643	30.2333	27.7183	28.5955	28.7142	29.3938	27.9946	23.9985	27.8741	29.0995	29.242	26.3428	28.173	28.3437	30.2113	27.6982	28.5748	28.6934	29.3724	27.9743	NA	27.8538	29.0784	29.2208	26.3237	28.3453	28.173	27.7057	28.1793	28.3437	28.4392	30.2113	29.4321	30.2342	27.8585	27.6847	27.6982	29.5274	28.2121	28.5748	28.8251	28.448	28.6934	29.0323	29.3724
A0A060Z272	C-type lectin domain-containing protein	2	323.31	28.3346	27.4262	28.4911	27.7387	26.9521	27.8508	28.3334	27.0664	28.0457	27.1551	28.0772	27.5323	27.9173	28.314	27.4063	28.4704	27.7185	26.9326	27.8305	28.3128	27.0467	28.0254	27.1354	28.0568	27.5124	27.897	28.314	28.4019	28.2612	27.4653	27.4063	27.1587	28.5441	28.2732	28.4704	27.5254	27.8492	27.7185	26.9326	27.1497	26.7736	27.5637	27.8305	27.9547	28.1899	28.4224
A0A060Z3J5	Ig-like domain-containing protein	2	137.36	27.2845	25.0572	26.672	25.1532	26.5157	27.2527	27.3655	26.5207	24.5912	26.6048	25.9708	27.2038	25.5103	27.2647	25.039	26.6526	25.1349	26.4964	27.2329	27.3456	26.5014	24.5733	26.5854	25.952	27.184	NA	27.2647	27.3129	27.1491	25.039	25.1513	24.9873	26.755	26.6324	26.6526	25.0115	NA	25.2584	27.3043	26.4964	26.3747	27.608	27.2329	26.9388	27.3456	27.5323
A0A060Z4W3	Uncharacterized protein	5	149.18	26.6016	26.8443	26.8445	26.523	26.3479	26.8768	26.7264	27.8802	25.7099	25.46	26.1167	24.8768	23.5719	26.5823	26.8248	26.825	26.5038	26.3288	26.8573	26.707	27.86	25.6912	25.4415	26.0977	24.8588	NA	26.4781	26.5956	26.5823	26.8248	26.7376	26.8615	26.6447	26.825	26.9006	26.5038	26.4514	26.5978	26.8518	26.3288	25.8941	26.8573	26.8311	27.2691	26.5859	26.9027
A0A060Z757	Apolipoprotein B-100-like; DUF1081 domain-containing protein	3	84.986	25.9321	25.8213	22.7147	24.8665	23.4938	25.217	25.038	24.475	24.0403	23.7585	24.5117	23.7772	25.7428	25.9132	25.8026	NA	24.8484	NA	25.1986	25.0198	NA	NA	NA	NA	NA	NA	25.4279	25.9132	26.0883	26.1707	25.8026	25.7452	NA	NA	NA	24.6654	24.8484	25.1809	NA	NA	NA	NA	25.2858	25.1115	24.737	25.266
A0A060Z9P5	Ig-like domain-containing protein	3	73.982	25.8334	23.904	23.7286	24.3312	26.0146	24.7463	25.5817	23.8051	23.2443	23.8973	25.0529	23.209	24.7973	25.8147	NA	NA	NA	25.9957	24.7283	25.5632	NA	NA	NA	NA	NA	NA	NA	25.8339	25.7954	NA	NA	NA	NA	NA	NA	NA	NA	NA	25.8476	26.2112	25.9957	NA	24.6057	24.8509	25.3292	25.6166
A0A060ZDQ0	Anaphylatoxin-like domain-containing protein (Fragment)	10	242.45	25.6997	26.8412	25.4424	25.5161	23.8062	24.4891	25.9877	25.9134	26.7837	27.2895	25.6661	26.4073	26.781	25.681	26.8217	25.4239	25.4976	23.7889	24.4713	25.9688	25.8945	26.7642	27.2696	25.6475	26.3881	26.7615	25.6958	25.681	25.4091	27.3083	26.1667	26.8217	25.5009	25.4192	25.4239	25.4976	25.409	25.9136	25.1296	23.7889	23.6927	24.1757	24.8797	24.4713	25.9688	26.0791
A0A060ZGE4	TED_complement domain-containing protein (Fragment)	4	185.34	25.8713	25.4585	26.6158	26.6526	26.3831	25.9665	27.5792	25.2568	25.8182	25.7111	25.0113	26.0117	24.949	25.8525	NA	26.5965	26.6333	26.3639	25.9476	27.5592	25.2384	25.7995	NA	NA	25.9928	24.9309	25.7008	25.8525	25.9924	NA	NA	NA	NA	26.5728	26.6201	26.6333	26.8783	26.5131	26.7566	26.3639	26.266	NA	25.9398	25.9555	27.3959	27.674
A0A060ZVC3	Uncharacterized protein (Fragment)	6	323.31	30.0089	29.5003	30.3608	29.8458	29.7759	30.7892	31.1193	30.9818	30.9259	30.3247	30.6327	29.978	29.4651	29.9871	29.4788	30.3388	29.8241	29.7542	30.7668	31.0967	30.9593	30.9034	30.3027	30.6104	29.9562	29.4437	29.9871	30.0301	29.9721	29.4788	29.4136	29.5558	30.3388	29.8489	30.4921	29.8172	29.8241	29.8499	29.868	29.7542	29.6148	30.9316	30.7445	30.7668	31.0967	31.1991
A0A061A7A8	Inter-alpha-trypsin inhibitor heavy chain H3-like	4	109.77	26.0002	25.1707	25.3573	25.7063	25.1792	25.497	25.4353	26.0849	23.7932	24.6844	24.6397	24.6994	24.915	25.9813	25.1524	25.3389	25.6877	25.1609	25.4785	25.4168	26.066	NA	24.6665	24.6218	24.6814	24.8969	25.9258	26.0369	NA	25.1524	25.0835	25.3875	25.3389	25.0661	25.5238	25.6877	25.5643	25.8931	25.6933	25.1609	24.7771	25.4785	25.7123	25.3365	24.8673	25.6068
A0A061A7B4	Uncharacterized protein (Fragment)	5	166.18	29.5255	29.727	29.9718	30.3344	30.9238	29.6799	30.0986	29.9408	30.5444	29.3769	28.5437	29.0518	28.8988	29.5041	29.7054	29.95	30.3124	30.9014	29.6583	30.0768	29.9191	30.5222	29.3556	28.523	29.0307	28.8779	29.4079	29.5041	29.7646	26.0455	29.7054	30.5202	29.7815	30.0326	29.95	30.3124	30.008	30.3459	30.8278	30.977	30.9014	29.6583	29.9899	27.8672	30.0768	30.4317
A0A061A7Q3	Ig-like domain-containing protein	1	78.282	26.222	26.8443	27.0133	25.2715	26.9144	27.3602	26.7104	23.8817	24.116	27.2069	26.9761	26.9263	25.5084	26.203	26.8248	26.9936	NA	26.8949	27.3404	26.691	NA	NA	27.1871	26.9565	26.9067	25.4899	26.4403	26.203	25.641	27.4804	26.294	26.8248	26.9936	27.1375	26.7851	NA	NA	NA	26.727	26.8949	26.921	27.3327	27.3404	27.5233	26.1544	26.691
A0A061A8T0	Peptidase S1 domain-containing protein	1	213.5	26.3772	24.8823	27.0035	27.1425	27.3922	26.9137	27.1975	23.3983	27.4682	26.6397	25.9249	26.6836	25.7783	26.3581	NA	26.9838	27.1227	27.3723	26.8942	27.1778	NA	27.4483	26.6204	25.906	26.6642	25.7596	26.1347	26.3581	26.4203	NA	NA	NA	26.9838	26.6327	27.069	27.1227	27.2749	26.8404	27.3569	27.3796	27.3723	27.0561	26.5855	26.8942	27.1778	27.2313
A0A061AD33	Ceruloplasmin	9	268.11	25.3541	26.402	26.9092	26.6418	27.3066	26.9434	27.3091	26.1255	26.9167	28.2226	27.5382	27.6255	27.3961	25.3357	26.3828	26.8897	26.6225	27.2868	26.9239	27.2893	26.1065	26.8971	28.2021	27.5182	27.6054	27.3762	25.9872	25.3357	25.1956	26.3828	26.4493	26.1674	26.8897	26.8992	26.7998	26.6225	26.9784	26.5007	27.455	27.2868	26.8061	26.9239	27.0051	26.1544	27.1746	27.4854
A5H0J9	Serum albumin (Fragment)	18	323.31	33.5759	33.5967	33.1004	33.563	33.7816	33.4231	33.6829	33.9149	31.7299	33.0062	32.9476	33.1685	32.9791	33.5515	33.5723	33.0763	33.5386	33.757	33.3988	33.6584	33.8903	31.7068	32.9822	32.9236	33.1444	32.9552	33.5337	33.5515	33.6041	33.6811	33.5723	33.5192	33.0227	33.0763	33.0969	33.5386	33.4108	33.5806	33.3973	33.8716	33.757	33.2429	33.3988	33.5073	33.5033	33.9119
A5JUT5	Sex hormone-binding globulin beta form	10	102.73	26.3211	26.2019	27.073	26.7182	24.2657	26.7772	27.8078	26.1658	23.4905	26.6385	27.4162	27.87	25.8802	26.302	26.1829	27.0533	26.6988	NA	26.7577	27.7876	26.1468	NA	26.6192	27.3963	27.8497	25.8614	26.2977	26.3064	NA	25.9123	NA	26.4535	27.2165	26.1961	27.0533	NA	26.908	26.4897	NA	25.7746	NA	27.0541	26.7577	26.3657	27.3663	27.7876
A8YQG5	Properdin P factor 3	3	78.363	24.9438	24.6116	23.5509	24.9443	22.6592	25.4368	25.6562	25.3653	24.0146	25.7845	26.1999	24.0696	25.6138	24.9257	24.5937	NA	24.9262	NA	25.4183	25.6376	NA	NA	25.7657	26.1809	NA	NA	NA	25.0616	24.7897	24.3703	24.8171	NA	25.6371	NA	NA	24.7531	24.9262	25.2475	26.5996	NA	NA	25.5226	25.4183	25.184	NA	25.7081
B5AXN8	Chitinase (EC 3.2.1.14)	8	90.928	25.7644	25.1657	25.4335	25.8618	26.8027	26.3716	25.5766	25.0081	26.9293	26.8012	26.4431	26.6883	25.6907	25.7457	25.1474	25.415	25.843	26.7832	26.3524	25.558	24.99	26.9097	26.7817	26.4239	26.6689	25.672	25.7457	25.5166	25.7499	25.2807	25.1474	25.1357	25.415	25.3454	25.4574	25.843	25.9039	25.838	26.7832	26.752	26.8048	26.0328	26.3524	26.3539	25.4263	25.558
B5KWB3	Mannan-binding lectin H3	2	146.31	22.8784	24.3064	25.39	23.5146	24.2355	22.8739	25.3745	23.9009	24.7538	24.4426	24.0212	24.2988	24.2981	NA	24.2888	25.3716	23.4975	24.2179	22.8573	25.3561	23.8836	24.7358	NA	24.0038	24.2812	NA	NA	NA	NA	24.2888	24.2994	24.1035	25.01	25.3716	25.693	23.7307	23.4975	22.9712	24.5603	24.1807	24.2179	22.7416	22.9731	NA	25.3561	25.6724
C0KIP4	C type lectin receptor B	14	323.31	31.1171	31.3826	30.6838	31.7693	32.0937	31.5105	31.374	31.8761	31.6487	32.4012	32.4059	31.9675	32.3486	31.0945	31.3598	30.6615	31.7462	32.0704	31.4877	31.3512	31.853	31.6257	32.3777	32.3824	31.9443	32.3251	31.0945	31.0135	31.1389	31.4231	31.3598	31.2898	30.5302	30.666	30.6615	31.6474	31.7462	31.8206	32.2305	32.0704	31.8515	31.4877	31.4771	31.561	31.3512	31.6972
C1BEH9	Histone H2A	1	45.28	28.7752	30.0035	27.5027	24.0052	29.277	27.8598	24.0107	24.2124	24.61	25.1009	24.8258	24.5424	24.4552	28.7543	29.9817	27.4827	NA	29.2557	27.8396	NA	NA	NA	NA	NA	NA	NA	28.7543	28.8151	28.7193	30.0669	29.9329	29.9817	27.608	27.4113	27.4827	NA	26.2608	NA	29.0277	29.3851	29.2557	27.1051	27.8967	27.8396	NA	NA
C1BEM6	Hemoglobin subunit beta	1	147.93	30.5183	29.3355	30.288	29.8134	31.3581	29.1727	27.7925	27.4709	23.5429	26.8834	29.9864	28.472	28.5711	30.4961	29.3142	30.266	29.7918	31.3354	29.1515	27.7723	27.451	NA	26.8639	29.9646	28.4513	28.5504	30.4194	30.5096	30.4961	29.5689	29.1823	29.3142	30.0522	30.266	30.2702	29.7918	29.8142	29.7747	32.0619	31.3354	31.203	29.76	28.9617	29.1515	27.7933	27.7723
C1BEX3	Hemoglobin subunit beta-4	3	323.31	34.1893	33.2334	33.1766	33.346	34.837	33.0608	30.9822	30.3292	30.3268	31.042	33.2618	31.9692	32.3319	34.1644	33.2092	33.1525	33.3217	34.8117	33.0368	30.9597	30.3072	30.3048	31.0195	33.2376	31.9459	32.3084	34.1253	34.1644	34.1756	33.2214	33.1409	33.2092	33.2353	32.9488	33.1525	33.3125	33.4033	33.3217	34.9469	34.8117	34.7099	33.1324	33.0156	33.0368	30.9597	31.3042
C1BF66	Cofilin-2	1	227.05	24.2508	24.8256	23.5563	24.7195	22.922	24.8608	24.4731	23.623	25.5984	25.8797	24.9991	25.633	24.7861	NA	24.8075	NA	NA	NA	NA	NA	NA	25.5798	25.8609	24.9809	25.6144	NA	NA	NA	24.3705	NA	24.754	24.861	NA	NA	NA	24.2163	NA	NA	NA	24.6015	NA	NA	NA	NA	NA	NA
C1BGI7	Hemoglobin subunit alpha-4	3	110.73	28.707	26.7902	27.4514	27.3193	29.5227	27.5863	23.2183	23.9217	25.463	25.3481	27.7106	26.2661	26.2104	28.6862	26.7707	27.4315	27.2995	29.5012	27.5663	NA	NA	25.4445	25.3297	27.6904	26.247	26.1913	28.6862	28.5631	28.6869	26.759	26.7707	26.9174	27.6348	27.2642	27.4315	27.3226	27.2995	27.1213	29.5012	29.8158	29.4207	27.5663	27.6305	27.4688	NA	NA
C1BH52	Heme-binding protein 2	7	111.96	28.1821	27.7922	27.2097	26.7039	26.9404	27.7881	27.7686	27.8306	23.5528	25.9187	26.4235	26.5354	26.2004	28.1617	27.772	27.1899	26.6845	26.9209	27.7679	27.7484	27.8104	NA	25.8999	26.4043	26.5161	26.1814	28.0964	28.1617	28.417	27.5317	27.772	27.7786	26.9828	27.5012	27.1899	26.5831	26.6845	26.7721	26.9209	27.3302	26.8077	27.6067	27.7679	27.9048	27.6775	27.7484
C1BHQ1	Prothrombin (EC 3.4.21.5) (Coagulation factor II)	6	117.85	25.36	26.3692	27.4592	25.1507	26.4159	24.5871	25.0786	23.6967	26.3265	27.8799	27.8814	28.5029	25.0655	25.3416	26.35	27.4393	25.1325	26.3967	24.5693	25.0603	NA	26.3074	27.8597	27.8612	28.4822	NA	24.7766	25.3416	25.5232	26.3116	26.35	26.3638	27.4393	27.7635	26.7708	25.1325	24.6043	25.1386	27.5397	26.3967	25.9032	NA	24.3499	24.7886	24.6155	25.5311
C4B4C5	Apolipoprotein A-II	6	323.31	33.033	32.9401	33.2045	32.7236	32.9578	33.4524	33.6145	33.1076	32.058	32.899	33.0518	33.1032	32.5465	33.009	32.9162	33.1803	32.6998	32.9339	33.4281	33.5901	33.0836	32.0347	32.8751	33.0278	33.0792	32.5228	32.9613	33.0494	33.009	32.9927	32.8135	32.9162	33.2812	32.9635	33.1803	32.6998	32.7641	32.5937	33.6089	32.9339	32.8727	33.56	33.3729	33.4281	33.5562	33.8613
D0FZZ1	Myoglobin	9	73.537	28.5861	27.9947	29.3607	28.3392	24.3698	29.8609	28.3798	24.6409	30.7002	26.8006	30.6231	30.4154	24.4465	28.5653	27.9743	29.3394	28.3186	NA	29.8392	28.3592	NA	30.6779	26.7811	30.6009	30.3933	NA	29.2247	28.4461	28.5653	28.1084	27.9743	27.7547	29.4418	28.5555	29.3394	28.2532	28.8186	28.3186	NA	NA	NA	30.4636	29.8392	29.7006	28.4607	28.1448
D5H440	Serum albumin 1 protein (Fragment)	10	323.31	33.5261	33.3592	32.9552	33.0624	33.3187	33.2669	33.3106	33.5437	32.1524	32.561	32.4681	32.7916	32.6001	33.5017	33.335	32.9312	33.0384	33.2945	33.2428	33.2864	33.5193	32.129	32.5373	32.4445	32.7678	32.5764	33.5526	33.4811	33.5017	33.335	33.3315	33.3802	32.9312	32.7896	32.9503	33.0384	33.152	32.9558	33.2945	33.3225	33.1519	33.1007	33.2428	33.2747	33.1197	33.5485
E7BAR3	Complement factor I (Fragment)	21	323.31	29.9332	29.8729	30.1927	29.8877	30.4516	30.2566	30.1388	30.5533	29.3891	30.2183	30.0834	29.7472	29.8521	29.9114	29.8512	30.1708	29.866	30.4295	30.2346	30.1169	30.5311	29.3677	30.1963	30.0616	29.7256	29.8304	30.1746	29.9114	29.9069	29.8704	29.8375	29.8512	30.1484	30.3177	30.1708	29.866	29.8628	30.0737	30.339	30.5903	30.4295	30.2346	30.2136	30.4172	29.6388	30.1765
F1DRC4	Complement factor B/C2	19	230.98	26.4869	25.9838	27.2228	26.6693	26.9774	27.3072	26.9456	25.6074	26.9075	26.3884	25.9579	26.5733	26.4625	26.4676	25.9649	27.203	26.6499	26.9578	27.2874	26.926	25.5888	26.8879	26.3693	25.939	26.554	26.4433	26.4676	26.7823	26.3643	26.4914	25.7539	25.9649	27.203	27.0753	27.263	26.7307	26.4912	26.6499	27.3437	26.9578	26.6256	27.1818	27.429	27.2874	27.0007	26.926
M9PNX6	Peptidoglycan recognition protein L2	3	46.222	24.249	23.9351	26.2517	24.2484	26.0231	22.9493	25.9267	22.6207	25.9628	26.4963	26.1694	25.8893	23.75	NA	NA	26.2326	NA	26.0042	NA	25.9079	NA	25.9439	26.477	26.1504	25.8705	NA	NA	NA	NA	NA	NA	NA	26.2326	26.0967	26.4671	NA	NA	NA	27.0214	26.0042	25.298	25.8867	NA	NA	25.6486	26.0652
O57523	Apolipoprotein A-I-1 (Apo-AI-1) (ApoA-I-1) (Apolipoprotein A1-1) [Cleaved into: Proapolipoprotein A-I-1 (ProapoA-I-1)]	33	323.31	34.9637	34.8989	34.7256	34.7214	35.0999	34.8656	34.8923	34.9244	35.3341	34.2601	34.0887	34.4136	34.3564	34.9383	34.8736	34.7004	34.6962	35.0744	34.8403	34.8669	34.899	35.3085	34.2352	34.0639	34.3886	34.3314	34.9154	34.9383	34.9938	34.855	34.8859	34.8736	34.6996	34.8096	34.7004	34.5865	34.6962	34.7327	35.1461	35.0744	34.7753	34.8468	34.8353	34.8403	34.7478	35.0806
P06350	Histone H1 [Cleaved into: Oncorhyncin II]	4	42.53	27.2839	27.3662	26.0144	24.5994	27.7696	24.3465	23.4746	23.9646	25.0853	26.2748	24.5758	22.7826	24.1676	27.2641	27.3463	25.9955	NA	27.7494	NA	NA	NA	NA	26.2558	NA	NA	NA	27.3961	27.1994	27.2641	27.1252	27.3463	27.358	26.1014	NA	25.8896	NA	NA	NA	27.7494	27.5977	28.0177	NA	NA	NA	NA	NA
P14527	Hemoglobin subunit alpha-4 (Alpha-4-globin) (Hemoglobin alpha-4 chain)	0	82.491	30.328	30.1963	28.2217	29.6622	30.5112	29.6924	26.0619	24.2951	25.2498	26.9955	29.8034	27.02	29.3601	30.306	30.1744	28.2012	29.6407	30.4891	29.6709	26.0429	NA	NA	26.9759	29.7817	27.0004	29.3388	30.5808	30.306	30.2805	30.1744	30.1612	30.1829	28.3651	27.9528	28.2012	29.8325	29.4594	29.6407	30.6089	30.4727	30.4891	28.6102	29.6709	29.6834	26.0135	26.0429
P62797	Histone H4	7	60.383	30.1152	30.6552	29.7498	27.2572	31.6777	28.6774	23.2559	23.481	27.4063	27.1797	22.7985	22.9569	27.791	30.0934	30.633	29.7282	27.2374	31.6547	28.6566	NA	NA	27.3864	27.1599	NA	NA	27.7708	30.1646	30.0934	30.046	30.479	30.7196	30.633	29.7282	29.642	29.8518	27.2374	27.1558	27.3109	32.0211	31.6547	31.2611	26.7792	28.6566	28.759	NA	NA
P69069	Histone H2B	4	95.606	28.5875	28.8346	26.816	24.5581	28.2855	26.6329	23.4841	24.1036	24.7422	25.2648	24.321	24.7098	25.0608	28.5667	28.8137	26.7965	NA	28.265	26.6136	NA	NA	NA	NA	NA	NA	NA	29.0065	28.3434	28.5667	29.2582	NA	28.3691	NA	26.4342	27.1587	NA	NA	NA	NA	28.4919	28.0381	26.5457	26.6814	NA	NA	NA
P79825	Hemopexin (Fragment)	11	323.31	33.603	32.2977	32.0017	32.3224	31.8857	32.6759	32.7577	33.7823	30.7962	31.1121	31.9113	31.9877	31.5799	33.5786	32.2742	31.9785	32.2989	31.8625	32.6522	32.7339	33.7578	30.7739	31.0895	31.8882	31.9645	31.557	33.6012	33.5534	33.5786	32.5073	32.2742	32.2335	32.1274	31.9785	31.9053	32.2989	32.4275	32.2005	31.8625	31.9318	31.576	32.2753	32.6599	32.6522	32.4622	32.8423
P98093	Complement C3 [Cleaved into: Complement C3 beta chain; Complement C3 alpha chain; C3a anaphylatoxin; Complement C3b alpha' chain; Complement C3c alpha' chain fragment 1; Complement C3dg fragment; Complement C3g fragment; Complement C3d fragment; Complement C3f fragment; Complement C3c alpha' chain fragment 2] (Fragment)	43	323.31	33.9361	34.3345	34.4921	34.8988	35.0531	33.9378	34.5806	34.5917	34.6297	35.0741	34.2117	34.5019	34.5901	33.9114	34.3096	34.4671	34.8734	35.0276	33.9131	34.5555	34.5666	34.6045	35.0486	34.1868	34.4768	34.565	33.9114	33.9412	33.8999	34.4255	34.2799	34.3096	34.4671	34.4317	34.5543	34.8478	34.8734	34.8991	35.1743	35.0276	34.831	33.9373	33.8128	33.9131	34.4186	34.8029
Q2L4Q6	Complement factor H	16	323.31	30.3579	31.2636	30.9242	31.2162	31.4761	31.7268	31.8655	30.8806	30.7108	31.6221	30.9232	30.8989	30.9233	30.3358	31.2409	30.9017	31.1935	31.4533	31.7037	31.8424	30.8581	30.6885	31.5991	30.9007	30.8764	30.9008	30.3073	30.3358	30.5322	31.2396	31.2867	31.2409	30.812	30.9017	30.9391	31.1935	31.1891	31.2135	31.5575	31.4533	31.3136	31.7037	31.6383	31.7368	31.6034	32.0126
Q2WFI5	Sex hormone-binding globulin	16	323.31	27.8695	27.8777	28.2607	28.3855	27.8469	28.2978	29.3876	27.3601	28.3259	27.8138	27.7246	28.4027	27.5751	27.8492	27.8575	28.2402	28.3649	27.8267	28.2772	29.3663	27.3402	28.3054	27.7936	27.7045	28.3821	27.555	27.9293	27.8492	27.7033	28.1111	27.5264	27.8575	28.2402	28.2321	28.447	28.3649	28.3103	28.4368	28.0053	27.8267	27.818	28.2772	28.3843	28.2156	29.1349	29.544
Q3LA41	Properdin P factor complement 1	1	128.88	25.3236	25.5225	25.9296	24.9001	23.5526	26.2894	26.2966	25.3882	23.6863	24.4424	24.4513	23.4954	24.9198	NA	25.504	25.9108	NA	NA	26.2703	26.2775	25.3697	NA	NA	NA	NA	NA	NA	NA	NA	NA	25.3336	25.6744	25.9108	25.7483	26.0776	NA	26.0772	NA	26.191	NA	NA	25.7455	26.2703	26.4728	26.1119	26.3027
Q4QZ18	Complement factor H1 protein	4	323.31	29.237	30.554	30.6094	30.1301	31.2219	31.2796	30.618	30.9222	29.9822	31.3131	30.2271	30.6945	30.3055	29.2158	30.5318	30.5872	30.1082	31.1992	31.2569	30.5957	30.8997	29.9604	31.2903	30.2051	30.6723	30.2835	29.4844	28.9134	29.2158	30.8269	30.5318	30.4242	30.5872	30.6101	30.5208	29.6901	30.1082	30.2016	31.3182	31.1992	30.9265	31.1594	31.2569	31.7727	30.1859	30.5957
Q5F4T3	Alpha-1-microglobulin (Bikunin) (HI-30) (Inter-alpha-trypsin inhibitor light chain) (Protein AMBP)	8	115.83	26.4811	27.6332	27.049	27.834	27.4369	27.638	27.9424	27.2764	27.5583	27.0663	27.1162	26.452	27.0186	26.4618	27.6131	27.0294	27.8138	27.417	27.6179	27.9221	27.2566	27.5383	27.0466	27.0966	26.4328	26.999	26.4228	26.4618	26.7583	27.4143	27.6131	27.8066	27.0294	26.7773	27.0486	27.7646	27.8578	27.8138	27.5427	27.4139	27.417	27.2749	27.7622	27.6179	27.8983	27.9221
Q6H963	Complement component C8 gamma	4	116.04	23.1517	24.6577	23.4479	23.8466	23.5768	23.7555	23.5066	23.8292	24.1539	23.4249	24.2206	23.079	24.1375	NA	NA	23.4309	NA	NA	23.7383	23.4896	NA	24.1363	23.4078	NA	23.0622	NA	NA	NA	NA	NA	NA	NA	23.146	NA	23.7158	NA	NA	NA	NA	NA	NA	23.596	NA	23.8806	23.4204	23.7569
Q6H964	Complement component C6	33	323.31	29.6163	29.4373	29.9058	29.5855	29.9908	29.8934	29.6099	29.6169	30.2777	30.0285	29.5734	29.7746	29.8101	29.5948	29.4159	29.8841	29.564	29.969	29.8717	29.5884	29.5954	30.2557	30.0067	29.5519	29.7529	29.7884	29.6571	29.471	29.5948	29.5432	29.4159	29.3876	29.8841	29.9106	29.7397	29.4374	29.564	29.5752	29.969	30.1392	29.8454	29.8375	29.8787	29.8717	29.3774	29.6896
Q6H965	Complement component C7-2	15	217.68	27.6983	27.7451	27.69	26.9824	26.7553	27.3284	28.032	26.9974	27.7851	26.9785	27.3714	27.6982	26.5684	27.6782	27.7249	27.6699	26.9628	26.7359	27.3085	28.0116	26.9778	27.7649	26.9589	27.3515	27.6781	26.5491	27.5517	27.7734	27.6782	27.7249	27.6275	27.8537	27.4528	27.6699	27.6754	26.9406	26.9628	27.0736	27.4836	26.7359	25.8047	27.3085	27.2569	27.3182	27.8492	28.1924
Q6XZB7	Complement C4 (Fragment)	1	70.398	23.9263	25.2148	26.6289	26.3738	23.8694	23.9536	23.1024	24.0693	24.0414	25.2186	24.7903	23.8322	24.6138	NA	25.1964	26.6095	26.3546	NA	NA	NA	NA	NA	25.2003	NA	NA	NA	NA	NA	NA	25.1174	NA	25.2755	26.6237	26.5098	26.6095	26.3393	26.3699	NA	25.152	NA	NA	NA	NA	NA	NA	NA
Q70TF5	Complement C4	3	323.31	27.6164	28.3508	29.942	29.7531	28.8641	28.1496	28.3162	28.7443	29.1804	28.8971	27.0472	27.9249	27.716	27.5963	28.3302	29.9203	29.7315	28.8431	28.1291	28.2957	28.7234	29.1592	28.8761	27.0275	27.9046	27.6958	27.6455	27.5963	27.5487	28.3958	28.3302	28.1948	29.9203	29.8773	30.0614	29.7258	29.7315	29.7611	29.0385	28.8431	28.4527	28.2219	28.0224	28.1291	27.933	28.3371
Q70W32	C1 inhibitor	9	323.31	27.2622	28.0811	28.9276	29.056	29.623	28.4479	29.1912	27.387	28.9401	28.7913	28.3187	28.3676	28.7204	27.2424	28.0607	28.9066	29.0349	29.6015	28.4273	29.17	27.3671	28.9191	28.7704	28.2982	28.347	28.6995	27.8903	26.952	27.2424	28.2298	27.6345	28.0607	28.9066	28.5978	29.0013	28.9908	29.0349	29.1417	30.1822	29.4435	29.6015	28.6837	28.4273	27.8589	28.8742	29.3818
Q70Z26	Actin beta (Beta-actin)	5	323.31	27.8695	29.2487	28.6399	27.974	28.9623	27.9574	27.2531	27.0904	29.3382	31.0038	29.8951	30.2266	28.1092	27.8492	29.2275	28.6191	27.9537	28.9413	27.9371	27.2333	27.0708	29.3169	30.9812	29.8734	30.2046	28.0887	27.8492	27.8594	27.6831	29.2275	29.0406	29.253	28.5067	28.6191	28.8261	27.9537	27.8658	27.998	29.3335	28.9413	28.7229	28.7184	27.9371	27.8107	27.2333	27.463
Q7T2K6	Carbonic anhydrase (EC 4.2.1.1)	8	256.18	26.9932	25.0444	26.6065	25.8363	28.6729	25.786	23.6675	23.5556	24.5997	24.3519	26.2243	23.1108	23.5805	26.9736	25.0262	26.5872	25.8176	28.652	25.7673	NA	NA	NA	NA	26.2052	NA	NA	27.1654	26.9032	26.9736	25.0262	24.1268	25.2319	26.5872	26.2116	26.6127	25.6329	26.049	25.8176	28.652	28.7653	28.4144	25.9041	25.7317	25.7673	NA	NA
Q7ZZW1	Alpha-1-antiproteinase-like protein	23	323.31	31.4087	30.8846	31.5312	31.5981	31.7426	31.672	32.691	31.1563	29.4837	31.3135	30.8958	31.7874	30.2787	31.3859	30.8622	31.5083	31.5751	31.7195	31.649	32.6673	31.1337	29.4623	31.2907	30.8733	31.7643	30.2567	31.3859	31.3682	31.4767	30.8622	30.807	30.9114	31.4668	31.5083	31.6377	31.4621	31.5751	31.6369	32.0685	31.7195	31.3533	31.8622	31.649	31.6486	32.2319	32.6673
Q804V3	Transferrin (Fragment)	1	323.31	23.8369	24.9674	23.0411	23.4512	24.6596	24.1809	22.9517	23.5645	24.7152	25.032	24.0552	24.0549	24.6398	23.8196	NA	NA	NA	24.6417	24.1633	NA	23.5474	NA	NA	NA	NA	NA	23.8274	23.6334	23.8196	NA	NA	NA	NA	NA	NA	NA	NA	NA	NA	24.8417	24.4417	24.4397	24.1633	23.8226	NA	NA
Q92004	Beta-2-microglobulin	3	108.81	26.3611	26.6448	25.8251	25.4583	25.4625	26.4043	26.7512	26.7037	23.8916	25.5943	25.4471	26.2139	24.9455	26.3419	26.6255	25.8064	25.4398	25.444	26.3851	26.7317	26.6843	NA	25.5757	25.4286	26.1949	24.9273	26.069	26.3419	26.3616	26.6626	26.6255	26.473	25.6577	25.8064	25.8739	25.4345	25.445	NA	25.7823	25.4422	25.444	26.2912	26.3851	26.6445	26.514	27.0098
Q92093	Vitellogenin (VTG) [Cleaved into: Lipovitellin I (LVI); Phosvitin (PV); Lipovitellin II (LVII)]	63	323.31	26.557	24.4802	31.2108	31.5027	24.3445	31.0995	32.6496	23.1601	29.4851	24.4985	30.8155	26.9866	27.8674	26.5377	NA	31.1881	31.4798	NA	31.077	32.6259	NA	29.4637	NA	30.7931	26.967	27.8471	27.1601	26.1861	26.5377	NA	NA	NA	31.1756	31.1881	31.2262	31.3989	31.4798	31.5802	NA	NA	NA	31.3277	31.0469	31.077	32.4808	32.7657
Q98973	Alpha-globin I	3	323.31	33.2815	31.9265	32.4185	31.9811	34.0848	31.8319	30.3872	29.4733	30.3497	30.4009	32.456	30.8049	30.9541	33.2573	31.9033	32.395	31.9578	34.06	31.8088	30.3652	29.4519	30.3277	30.3789	32.4324	30.7826	30.9316	33.3649	33.2573	33.2465	31.9033	31.9381	31.692	32.4858	32.3655	32.395	31.9459	32.079	31.9578	34.0762	34.06	33.7833	31.7826	31.8088	31.9336	30.0926	30.4709
Q98974	Alpha-globin IV (Hemoglobin subunit alpha-1)	6	323.31	33.0189	32.0711	31.5432	32.2754	33.8756	32.1085	29.4337	29.6985	29.871	29.9961	32.2234	30.315	31.6711	32.9949	32.0478	31.5202	32.252	33.851	32.0852	29.4123	29.6769	29.8493	29.9743	32.2	30.2929	31.6481	32.9617	32.9949	32.9956	31.9606	32.4008	32.0478	31.8628	31.5202	31.4871	32.252	32.1573	32.3416	33.6034	33.851	33.9257	31.4909	32.0852	32.1833	29.4123	29.9186
Q98977	Complement component C3-3 (Fragment)	6	210.16	26.4231	24.5167	26.7173	26.9277	27.1814	26.5475	27.1333	27.2662	27.392	26.6538	27.1126	27.8877	28.4408	26.404	NA	26.6979	26.9081	27.1616	26.5282	27.1135	27.2464	27.3721	26.6344	27.0929	27.8674	28.4202	26.5448	26.404	26.207	NA	NA	NA	NA	26.8339	26.5619	26.7273	27.2897	26.9081	26.9095	27.1616	27.5385	26.5282	26.5743	26.2639	26.8323	27.1689
Q9DDV9	Complement component C3-4 (Fragment)	1	323.31	26.934	28.2144	28.8575	28.6834	27.8916	28.9172	29.2058	29.4566	27.3934	29.2382	27.0284	28.6719	27.8857	26.9144	28.1939	28.8366	28.6626	27.8713	28.8962	29.1846	29.4352	27.3735	29.2169	27.0088	28.6511	27.8655	27.1854	26.9144	26.3078	28.3037	28.1939	28.1001	28.6643	28.8366	28.8824	28.6134	28.7307	28.6626	27.8713	27.9346	27.659	28.7843	28.9064	28.8962	28.8833	29.3065
Q9DEC8	Complement factor B/C2-B	23	323.31	26.275	25.6152	26.5536	27.8913	27.0415	26.7452	27.4238	25.2865	26.4186	27.0084	26.8404	27.0628	26.5038	26.2559	25.5966	26.5343	27.871	27.0219	26.7258	27.4039	25.2682	26.3994	26.9888	26.8209	27.0431	26.4845	26.1054	26.2559	26.4282	NA	25.4533	25.7399	26.5487	26.4494	26.5343	27.871	27.9842	27.6681	26.6658	27.0847	27.0219	27.0758	26.4691	26.7258	27.4039	27.3842
Q9DFF7	Biotinidase 2 (Fragment)	5	228.69	26.8751	24.6097	26.3592	26.8368	27.2262	26.467	26.9361	27.5021	27.3287	28.2005	25.3807	26.0908	24.6919	26.8556	NA	26.3401	26.8173	27.2064	26.4477	26.9165	27.4821	27.3089	28.18	25.3623	26.0719	NA	26.8556	26.8773	26.4762	27.0919	NA	NA	27.0258	26.3401	26.3297	26.8926	26.8173	26.2592	27.2064	27.6855	26.1564	26.424	26.9643	26.4477	26.9165	27.2784
Q9DFF8	Biotinidase 1 (Fragment)	1	224.88	24.7373	26.4355	25.9463	26.6642	25.7576	25.9012	26.8508	26.3953	25.7896	26.1001	25.0926	25.9655	26.0203	24.7194	26.4163	25.9274	26.6448	25.7389	25.8824	26.8313	26.3761	25.7708	26.0811	25.0744	25.9467	26.0014	24.7194	24.5133	24.9469	26.4531	26.4163	26.2753	25.7729	25.9274	26.0038	26.5184	26.6448	27.0568	26.6754	25.6959	25.7389	25.5576	25.9974	25.8824	26.5642	27.2989
Q9DG75	Apolipoprotein C-II (Apo-CII) (ApoC-II) (Apolipoprotein C2)	2	117.37	26.814	26.8132	24.7147	25.8016	25.1069	25.8961	24.893	27.6016	26.4235	23.9357	23.8104	23.6982	24.5174	26.7946	26.7938	24.6968	25.7829	25.0887	25.8773	24.8749	27.5815	26.4043	23.9183	23.7931	23.681	NA	26.7946	26.6187	27.5613	26.7938	26.8837	26.4918	24.6016	24.6968	24.9297	25.4353	NA	26.1305	24.77	25.2144	25.0887	24.7328	25.8773	25.8799	NA	25.0518
Q9I9M6	Zona pellucida sperm-binding protein 3	14	323.31	26.4765	26.0198	27.3326	27.6955	24.9916	27.6685	28.8636	23.693	24.3786	24.4481	26.6654	23.8981	25.2769	26.4572	26.0009	27.3128	27.6753	NA	27.6484	28.8426	NA	NA	NA	26.646	NA	NA	26.4652	26.4572	26.1933	26.2014	25.451	26.0009	27.171	27.7824	27.3128	27.6753	27.6204	27.8217	NA	NA	NA	27.8492	27.6484	27.4649	28.7639	28.9004
Q9IB53	Rhamnose binding lectin STL1	1	323.31	26.5434	27.5242	27.2097	26.7913	26.9601	26.5677	27.4307	25.7125	26.5626	27.828	26.4324	27.4287	27.2357	26.5241	27.5042	27.1899	26.7718	26.9405	26.5484	27.4108	25.6938	26.5433	27.8078	26.4132	27.4088	27.2159	27.4014	26.5241	26.3738	26.9041	27.8598	27.5042	26.8814	27.333	27.1899	26.482	26.7964	26.7718	27.0596	26.9405	26.5942	26.7741	26.5484	26.3338	26.9548	27.5042
Q9PT02	Apolipoprotein E	11	323.31	28.5456	28.1003	26.5285	27.8488	29.293	28.1825	27.6331	27.587	28.5338	27.5219	27.7606	28.2746	28.7187	28.5248	28.0799	26.5092	27.8286	29.2717	28.162	27.6131	27.567	28.513	27.5019	27.7404	28.254	28.6979	28.5248	28.4568	28.5432	28.0183	28.2158	28.0799	26.3658	26.5092	27.2095	28.0092	27.7687	27.8286	29.2276	29.4418	29.2717	27.634	28.3384	28.162	27.6131	27.9549
Q9PT13	Serotransferrin	2	311.77	27.6245	24.3374	23.334	27.5578	26.8498	27.4841	24.0417	26.8399	24.4755	25.4109	23.8983	23.8729	27.2845	27.6045	NA	NA	27.5378	26.8303	27.4642	NA	26.8204	NA	NA	NA	NA	27.2647	27.3712	27.6045	27.8576	NA	NA	NA	NA	NA	NA	27.5378	27.6843	27.176	27.6996	26.6479	26.8303	26.5115	27.4877	27.4642	NA	NA
Q9YGE8	Complement factor Bf-2 (Fragment)	5	323.31	30.5221	30.703	30.7035	31.2501	30.9533	31.8175	30.9158	30.1264	31.0661	31.9085	31.8115	31.8344	30.8927	30.4999	30.6807	30.6812	31.2274	30.9308	31.7944	30.8933	30.1045	31.0436	31.8853	31.7884	31.8112	30.8703	30.4999	30.4308	30.5189	30.6807	30.6678	30.8189	30.6812	30.5203	30.8159	31.2274	31.3077	31.0668	31.2848	30.8977	30.9308	32.0209	31.7428	31.7944	30.7659	31.061
W8W0X1	Glutathione peroxidase 4a1 (EC 1.11.1.9)	5	42.06	26.2602	26.5125	24.0978	26.0597	23.865	23.6004	26.5446	23.4161	24.1322	26.1067	23.534	23.3597	24.9073	26.2411	26.4933	NA	26.0407	NA	NA	26.5253	NA	NA	NA	NA	NA	NA	26.2898	26.1924	NA	26.5487	26.1908	26.4933	NA	NA	NA	25.8981	26.1833	NA	NA	NA	NA	NA	NA	NA	26.2314	26.5253
[truncated: 58 more columns]

## Sheet: Table S2.3.
Table S2.3. Differently expressed plasma proteins (DEPs) of Oncorhynchus mykiss from fish farm with a vibriosis outbreak.
*Kanehisa M, Sato Y, Morishima K. BlastKOALA and GhostKOALA: KEGG Tools for Functional Characterization of Genome and Metagenome Sequences. J Mol Biol. 2016;428(4):726-731. doi: 10.1016/j.jmb.2015.11.006. Epub 2015 Nov 14. PMID: 26585406.
** Toronen P, Medlar A, Holm L (2018) PANNZER2: A rapid functional annotation webserver. Nucl. Acids Res.46, W84-W88.doi: 10.1093/nar/gky350
^ Hallgren J., Tsirigos K.D., Pedersen M.D., Armenteros J.J.A., Marcatili P., Nielsen H., Krogh A., Winther O. (2021). DeepTMHMM. https://biolib.com/DTU/DeepTMHMM
^^Almagro Armenteros JJ, Tsirigos KD, Sønderby CK, Petersen TN, Winther O, Brunak S, von Heijne G, Nielsen H. SignalP 5.0 improves signal peptide predictions using deep neural networks. Nat Biotechnol. 2019 Apr;37(4):420-423. doi: 10.1038/s41587-019-0036-z. Epub 2019 Feb 18. PMID: 30778233.
Cluster of co-regulated proteins	ProteinID (UniprotKB)	Protein Name	DEPs AS vs SL	DEPs IP vs SL	DEP AS vs IP	KEGG Pathway*	GO Terms*	Transtrans Membrane Domain^	Secretion Signal^^	Correlation with IchthyopathologyScore	Correlation with Granulocytes%	Correlation with il8(spleen)	Correlation with il1b(spleen)	Correlation with tgfb(spleen)	Correlation with Vibrio Otu0001(spleen)	Correlation with Lymphocytes%
2	A0A060YJC7	Hemoglobin subunit alpha	AS>SL	-	-		hemoglobin complex [GO:0005833]; oxygen binding [GO:0019825]; metal ion binding [GO:0046872]; oxygen transport [GO:0015671]; heme binding [GO:0020037]; oxygen carrier activity [GO:0005344]; iron ion binding [GO:0005506]	-	-	-	-	-	-	-	-	-
2	A0A060WXT1	Ig light chain (kappa ) precursor	-	IP>SL	-			-	-	-	-	-	-	-	-	-
2	A0A060YKT0	Apolipoprotein A-I-like protein	AS>SL	-	-	Fat digestion and absorption[map04975]; Vitamin digestion and absorption[map04977]; Cholesterol metabolism[map04979]	lipid transport [GO:0006869]; lipoprotein metabolic process [GO:0042157]; lipid binding [GO:0008289]; extracellular region [GO:0005576]; membrane [GO:0016020]; integral component of membrane [GO:0016021]; extracellular space [GO:0005615]; response to lipopolysaccharide [GO:0032496]; high-density lipoprotein particle [GO:0034364]; lipid metabolic process [GO:0006629]; cholesterol metabolic process…	-	-	-	-0.654238	-	-	-	-	0.61535
2	A0A060WCH3	Apolipoprotein B-100-like, DUF1943 domain-containing protein	AS>SL	IP>SL	-		lipid transport [GO:0006869]; lipid transporter activity [GO:0005319]	-	-	-	-	-	-	-	-	-
2	A0A060W754	Apolipoprotein B-100-like;Vitellogenin domain-containing protein	AS>SL	IP>SL	-		lipid transport [GO:0006869]; lipid transporter activity [GO:0005319]; membrane [GO:0016020]; integral component of membrane [GO:0016021]	-	secreted	-	-	-	-	-	-	-
2	P79899	Pentraxin	-	IP>SL	-		metal ion binding [GO:0046872]; extracellular region [GO:0005576]	-	secreted	-	-	-0.764564	-0.692886	-	-	-
2	A0A060WI78	Kininogen-1-like protein	AS>SL	-	-	Complement and coagulation cascades[map04610]; Inflammatory mediator regulation of TRP channels[map04750]; Neuroactive ligand-receptor interaction[map04080]; Regulation of actin cytoskeleton[map04810]; cGMP-PKG signaling pathway[map04022]; Sphingolipid signaling pathway[map04071]	negative regulation of endopeptidase activity [GO:0010951]; cysteine-type endopeptidase inhibitor activity [GO:0004869]; immune response [GO:0006955]; sperm flagellum [GO:0036126]; protease binding [GO:0002020]; proteolysis [GO:0006508]; cysteine-type peptidase activity [GO:0008234]	-	secreted	-	-	-	-	-	-	-
2	A0A060WW01	Alpha-2-macroglobulin-like, MG3 domain-containing protein	AS>SL	IP>SL	-		negative regulation of endopeptidase activity [GO:0010951]; endopeptidase inhibitor activity [GO:0004866]	-	secreted	-0.684996	-0.627125	-0.734756	-0.700845	-	-	0.609143
2	A0A060YZ84	Alpha-2-macroglobulin-like	-	IP>SL	-		negative regulation of endopeptidase activity [GO:0010951]; negative regulation of peptidase activity [GO:0010466]; endopeptidase inhibitor activity [GO:0004866]; extracellular space [GO:0005615]; serine-type endopeptidase inhibitor activity [GO:0004867]; extracellular region [GO:0005576]; peptidase inhibitor activity [GO:0030414]	-	-	-	-	-	-	-	-	-
2	A0A060WUN3	Alpha-2-macroglobulin-like	AS>SL	IP>SL	-		negative regulation of endopeptidase activity [GO:0010951]; negative regulation of peptidase activity [GO:0010466]; endopeptidase inhibitor activity [GO:0004866]; serine-type endopeptidase inhibitor activity [GO:0004867]; extracellular space [GO:0005615]; extracellular region [GO:0005576]; peptidase inhibitor activity [GO:0030414]	-	-	-	-	-	-	-	-	-
2	A0A060XRC5	Inter-alpha-trypsin inhibitor heavy chain H3-like	AS>SL	IP>SL	-		negative regulation of endopeptidase activity [GO:0010951]; negative regulation of peptidase activity [GO:0010466]; serine-type endopeptidase inhibitor activity [GO:0004867]; hyaluronan metabolic process [GO:0030212]; extracellular region [GO:0005576]; peptidase inhibitor activity [GO:0030414]	-	secreted	-	-	-	-	-	-	-
2	A0A060YU50	Apolipoprotein M-like protein	AS>SL	IP>SL	-		membrane [GO:0016020]; integral component of membrane [GO:0016021]	-	secreted	-	-	-0.686813	-0.626374	-	-	-
3	A0A060WUV2	Cadherin-1	AS>SL	-	AS>IP	Cell adhesion molecules[map04514]; Adherens junction[map04520]; Rap1 signaling pathway[map04015]; Apelin signaling pathway[map04371]; Hippo signaling pathway[map04390]	cell adhesion [GO:0007155]; membrane [GO:0016020]; calcium ion binding [GO:0005509]; homophilic cell adhesion via plasma membrane adhesion molecules [GO:0007156]; cellular anatomical entity [GO:0110165]; cell-cell adhesion [GO:0098609]; plasma membrane [GO:0005886]; metal ion binding [GO:0046872]; integral component of membrane [GO:0016021]; regulation of signal transduction [GO:0009966]	-	secreted	-	-	-	-	-	-	-
1	A0A060WKG4	Creatine kinase	AS<SL	IP<SL	-	Arginine and proline metabolism[map00330]	nucleotide binding [GO:0000166]; catalytic activity [GO:0003824]; transferase activity, transferring phosphorus-containing groups [GO:0016772]; phosphorylation [GO:0016310]; transferase activity [GO:0016740]; creatine kinase activity [GO:0004111]; phosphocreatine biosynthetic process [GO:0046314]; kinase activity [GO:0016301]; ATP binding [GO:0005524]	-	-	-	-	0.62647	-	-	-	-
1	S0F2P2	Creatine kinase	AS<SL	IP<SL	-	Arginine and proline metabolism[map00330]	nucleotide binding [GO:0000166]; catalytic activity [GO:0003824]; transferase activity, transferring phosphorus-containing groups [GO:0016772]; phosphorylation [GO:0016310]; transferase activity [GO:0016740]; phosphocreatine biosynthetic process [GO:0046314]; creatine kinase activity [GO:0004111]; kinase activity [GO:0016301]; ATP binding [GO:0005524]	-	-	-	-	0.674967	0.621208	-	-	-
1	A0A060WE68	Nucleoside diphosphate kinase	-	IP<SL	-	Purine metabolism[map00230]; Pyrimidine metabolism[map00240]; Drug metabolism - other enzymes[map00983]; Biosynthesis of cofactors[map01240]	nucleotide binding [GO:0000166]; GTP biosynthetic process [GO:0006183]; CTP biosynthetic process [GO:0006241]; nucleoside diphosphate phosphorylation [GO:0006165]; nucleoside diphosphate kinase activity [GO:0004550]; phosphorylation [GO:0016310]; transferase activity [GO:0016740]; kinase activity [GO:0016301]; UTP biosynthetic process [GO:0006228]; ATP binding [GO:0005524]; metal ion binding [GO:…	-	-	-	-	-	-	-	-	-
1	A0A060XGG8	Haptoglobin;Peptidase S1 domain-containing protein	AS<SL	IP<SL	-		blood coagulation [GO:0007596]; serine-type endopeptidase activity [GO:0004252]; proteolysis [GO:0006508]; extracellular space [GO:0005615]; complement activation, classical pathway [GO:0006958]; calcium ion binding [GO:0005509]; anatomical structure development [GO:0048856]; peptidase activity [GO:0008233]; serine-type peptidase activity [GO:0008236]; hemostasis [GO:0007599]; acute-phase respons…	-	-	-	-	0.653846	0.664835	-	-	-
1	A0A060YZR6	Haptoglobin;Peptidase S1 domain-containing protein	AS<SL	IP<SL	-		blood coagulation [GO:0007596]; serine-type endopeptidase activity [GO:0004252]; proteolysis [GO:0006508]; extracellular space [GO:0005615]; complement activation, classical pathway [GO:0006958]; calcium ion binding [GO:0005509]; anatomical structure development [GO:0048856]	-	-	-	-	0.613481	0.640991	-	-	-
1	A0A060YWY3	Fibrinogen beta chain	-	IP<SL	-	Complement and coagulation cascades[map04610]; Neutrophil extracellular trap formation[map04613]; Platelet activation[map04611]	blood coagulation [GO:0007596]; protein polymerization [GO:0051258]; metal ion binding [GO:0046872]; hemostasis [GO:0007599]; signaling receptor binding [GO:0005102]; platelet activation [GO:0030168]; fibrinogen complex [GO:0005577]; extracellular region [GO:0005576]; cellular anatomical entity [GO:0110165]; angiogenesis [GO:0001525]; cell differentiation [GO:0030154]; receptor tyrosine kinase bi…	-	-	-	-	-	-	-	-	-
1	A0A060XUK2	Fibrinogen gamma chain	-	IP<SL	-	Complement and coagulation cascades[map04610]; Neutrophil extracellular trap formation[map04613]; Platelet activation[map04611]	blood coagulation [GO:0007596]; platelet activation [GO:0030168]; fibrinogen complex [GO:0005577]; protein polymerization [GO:0051258]; metal ion binding [GO:0046872]; hemostasis [GO:0007599]; signaling receptor binding [GO:0005102]; extracellular region [GO:0005576]; cellular anatomical entity [GO:0110165]; membrane [GO:0016020]; integral component of membrane [GO:0016021]	-	secreted	-	-	-	-	-	-	-
1	A0A060X9D3	Pigment epithelium-derived factor;SERPIN domain-containing protein, Serpin F1-like protein	AS<SL	-	-	Wnt signaling pathway[map04310]	blood coagulation [GO:0007596]; negative regulation of endopeptidase activity [GO:0010951]; serine-type endopeptidase inhibitor activity [GO:0004867]; extracellular space [GO:0005615]; negative regulation of fibrinolysis [GO:0051918]; thiol-dependent deubiquitinase [GO:0004843]; peptidase activity [GO:0008233]; proteolysis [GO:0006508]; cysteine-type peptidase activity [GO:0008234]; protein metab…	-	secreted	0.735193	-	-	-	-	-	-
1	A0A060WGU6	Angiotensin	AS<SL	IP<SL	-	Renin-angiotensin system[map04614]; Renin secretion[map04924]; Vascular smooth muscle contraction[map04270]; Cortisol synthesis and secretion[map04927]; Aldosterone synthesis and secretion[map04925]; Adrenergic signaling in cardiomyocytes[map04261]; Neuroactive ligand-receptor interaction[map04080]; Phospholipase D signaling pathway[map04072]	blood coagulation [GO:0007596]; negative regulation of endopeptidase activity [GO:0010951]; serine-type endopeptidase inhibitor activity [GO:0004867]; regulation of systemic arterial blood pressure by renin-angiotensin [GO:0003081]; extracellular space [GO:0005615]; vasoconstriction [GO:0042310]; extracellular region [GO:0005576]; cytoplasm [GO:0005737]; sperm flagellum [GO:0036126]; thiol-depend…	-	secreted	-	0.701099	0.686813	0.615385	-	-	-0.648352
1	A0A060WHT8	Complement component C7-1	AS<SL	IP<SL	-	Complement and coagulation cascades[map04610]	complement activation, classical pathway [GO:0006958]; innate immune response [GO:0045087]; immune response [GO:0006955]; complement activation [GO:0006956]; immune system process [GO:0002376]; extracellular region [GO:0005576]; membrane attack complex [GO:0005579]; cytolysis [GO:0019835]; complement activation, alternative pathway [GO:0006957]; anatomical structure development [GO:0048856]; memb…	-	secreted	-	-	-	-	-	-	-
1	A0A060X8X3	Complement factor B-like	-	IP<SL	-	Complement and coagulation cascades[map04610]	complement activation [GO:0006956]; innate immune response [GO:0045087]; peptidase activity [GO:0008233]; proteolysis [GO:0006508]; serine-type peptidase activity [GO:0008236]; serine-type endopeptidase activity [GO:0004252]; immune system process [GO:0002376]; extracellular region [GO:0005576]; hydrolase activity [GO:0016787]	-	secreted	-	-	-	-	-	-	-
1	C1BGU6	Lysozyme g	-	IP<SL	-		defense response to bacterium [GO:0042742]; lysozyme activity [GO:0003796]; cell wall macromolecule catabolic process [GO:0016998]; metabolic process [GO:0008152]; catalytic activity [GO:0003824]; peptidoglycan catabolic process [GO:0009253]; hydrolase activity [GO:0016787]; cytolysis [GO:0019835]; hydrolase activity, acting on glycosyl bonds [GO:0016798]; extracellular space [GO:0005615]; membra…	-	-	-	-	0.610697	0.617408	-	-	-
1	P11941	Lysozyme C II	AS<SL	IP<SL	-		defense response to bacterium [GO:0042742]; metabolic process [GO:0008152]; extracellular space [GO:0005615]; catalytic activity [GO:0003824]; extracellular region [GO:0005576]; lysozyme activity [GO:0003796]; hydrolase activity [GO:0016787]; cytolysis [GO:0019835]; hydrolase activity, acting on glycosyl bonds [GO:0016798]	-	secreted	-	0.655666	0.662999	0.685008	-	-	-
1	Q08G23	Cathelicidin antimicrobial peptide	-	IP<SL	-		defense response to Gram-negative bacterium [GO:0050829]; cytolysis [GO:0019835]; lipopolysaccharide binding [GO:0001530]; positive regulation of gene expression [GO:0010628]; defense response to Gram-positive bacterium [GO:0050830]	-	secreted	-	-	0.637541	0.63083	-	0.615142	-
1	P0DMV4	Intelectin	AS<SL	IP<SL	-		induction of bacterial agglutination[GO:0043152]; mannose binding [GO:0005537]; cytoplasm [GO:0005737]; extracellular space [GO:0005615]; chitin binding [GO:0008061]; metal ion binding [GO:0046872]; carbohydrate binding [GO:0030246]; lipopolysaccharide binding [GO:0001530]; cytolytic granule [GO:0044194]; brush border [GO:0005903]; cytosol [GO:0005829]; plasma membrane [GO:0005886]	-	secreted	-	-	-	-	-	-	-
1	Q9PT14	Precerebellin-like protein, Cerebellin 10	AS<SL	IP<SL	-		response to lipopolysaccharide [GO:0032496]; extracellular space [GO:0005615]; membrane [GO:0016020]; integral component of membrane [GO:0016021]	-	secreted	-	0.604396	-	0.604396	-	-	-
1	A0A060Y0R7	Ceruloplasmin;Plastocyanin-like domain-containing protein	AS<SL	IP<SL	-	Porphyrin metabolism[map00860]; Ferroptosis[map04216]	copper ion binding [GO:0005507]; oxidoreductase activity [GO:0016491]; metal ion binding [GO:0046872]; regulation of response to external stimulus [GO:0032101]; extracellular region [GO:0005576]	-	secreted	0.656509	0.608791	-	-	-	-	-
1	C1BG12	Leukocyte cell-derived chemotaxin 2;Chemotaxin;LECT2 neutrophil	AS<SL	IP<SL	-		metal ion binding [GO:0046872]; membrane [GO:0016020]; integral component of membrane [GO:0016021]	-	-	-	-	-	-	-	-	-
1	A0A060WC08	Phosphoglycerate kinase	-	IP<SL	-	Glycolysis / Gluconeogenesis[map00010]; Carbon metabolism[map01200]; Biosynthesis of amino acids[map01230] HIF-1 signaling pathway[map04066]	glycolytic process [GO:0006096]; nucleotide binding [GO:0000166]; phosphoglycerate kinase activity [GO:0004618]; phosphorylation [GO:0016310]; transferase activity [GO:0016740]; kinase activity [GO:0016301]; ATP binding [GO:0005524]	-	-	-	-	0.620205	-	-	-	-
1	A0A060Z9H8	Phosphoglycerate mutase	AS<SL	IP<SL	-	Glycolysis / Gluconeogenesis[map00010]; Carbon metabolism[map01200]; Glucagon signaling pathway[map04922]; Biosynthesis of amino acids[map01230]; Glycineserine and threonine metabolism[map00260]	glycolytic process [GO:0006096]; bisphosphoglycerate mutase activity [GO:0004082]; intramolecular transferase activity, phosphotransferases [GO:0016868]; catalytic activity [GO:0003824]; phosphoglycerate mutase activity [GO:0004619]; isomerase activity [GO:0016853]; hydrolase activity [GO:0016787]	-	-	-	-	0.620205	-	-	-	-
1	A0A060WUI1	Fructose-bisphosphate aldolase	AS<SL	IP<SL	-	Glycolysis / Gluconeogenesis[map00010]; Carbon metabolism[map01200]; Fructose and mannose metabolism[map00051]; Pentose phosphate pathway[map00030]; Biosynthesis of amino acids[map01230]; HIF-1 signaling pathway[map04066]	glycolytic process [GO:0006096]; catalytic activity [GO:0003824]; lyase activity [GO:0016829]; fructose-bisphosphate aldolase activity [GO:0004332]	-	-	-	-	-	-	-	-	-
1	A0A060VVE5	Fructose-bisphosphate aldolase	-	IP<SL	-	Glycolysis / Gluconeogenesis[map00010]; Carbon metabolism[map01200]; Fructose and mannose metabolism[map00051]; Biosynthesis of amino acids[map01230]; Pentose phosphate pathway[map00030]; HIF-1 signaling pathway[map04066]	glycolytic process [GO:0006096]; catalytic activity [GO:0003824]; lyase activity [GO:0016829]; fructose-bisphosphate aldolase activity [GO:0004332]	-	-	-	-	0.624119	-	-	-	-
1	A0A060VUA9	Triosephosphate isomerase	AS<SL	IP<SL	-	Glycolysis / Gluconeogenesis[map00010]; Carbon metabolism[map01200]; Fructose and mannose metabolism[map00051]; Biosynthesis of amino acids[map01230]; Inositol phosphate metabolism[map00562]	glycolytic process [GO:0006096]; gluconeogenesis [GO:0006094]; catalytic activity [GO:0003824]; methylglyoxal synthase activity [GO:0008929]; lyase activity [GO:0016829]; triose-phosphate isomerase activity [GO:0004807]; isomerase activity [GO:0016853]	-	-	-	-	-	-	-	-	-
1	Q90ZF1	Glyceraldehyde-3-phosphate dehydrogenase	-	IP<SL	-	Glycolysis / Gluconeogenesis[map00010]; Carbon metabolism[map01200]; Biosynthesis of amino acids[map01230]; HIF-1 signaling pathway[map04066]	glycolytic process [GO:0006096]; nucleotide binding [GO:0000166]; NAD binding [GO:0051287]; oxidoreductase activity [GO:0016491]; NADP binding [GO:0050661]; glyceraldehyde-3-phosphate dehydrogenase (NAD+) (phosphorylating) activity [GO:0004365]; oxidoreductase activity, acting on the aldehyde or oxo group of donors, NAD or NADP as acceptor [GO:0016620]; glucose metabolic process [GO:0006006]; cyt…	-	-	-	-	-	-	-	-	-
1	A0A060YWQ3	Enolase	AS<SL	IP<SL	-	Glycolysis / Gluconeogenesis[map00010]; Carbon metabolism[map01200]; Biosynthesis of amino acids[map01230]; RNA degradation[map03018]; HIF-1 signaling pathway[map04066]	glycolytic process [GO:0006096]; magnesium ion binding [GO:0000287]; phosphopyruvate hydratase activity [GO:0004634]; lyase activity [GO:0016829]; phosphopyruvate hydratase complex [GO:0000015]	-	-	-	-	-	-	-	-	-
1	A0A060WGR2	L-lactate dehydrogenase	-	IP<SL	-	Glycolysis / Gluconeogenesis[map00010]; Glucagon signaling pathway[map04922]; Pyruvate metabolism[map00620]; Propanoate metabolism[map00640]; Cysteine and methionine metabolism[map00270]; HIF-1 signaling pathway[map04066]	carbohydrate metabolic process [GO:0005975]; L-lactate dehydrogenase activity [GO:0004459]; extracellular exosome [GO:0070062]; cytoplasm [GO:0005737]; oxidoreductase activity, acting on the CH-OH group of donors, NAD or NADP as acceptor [GO:0016616]; oxidoreductase activity [GO:0016491]; catalytic activity [GO:0003824]; carboxylic acid metabolic process [GO:0019752]; malate dehydrogenase activit…	-	-	-	-	-	-	-	-	-
1	A0A060XKK4	Saxitoxin and tetrodotoxin-binding protein 2-like; Apolipoprotein M-like	AS<SL	-	-		membrane [GO:0016020]; integral component of membrane [GO:0016021]	-	secreted	-	-	-	-	-	-	-
1	A0A060YST0	Apolipoprotein M-like protein	AS<SL	IP<SL	-		extracellular region[GO:0005576]	-	-	-	-	0.627182	0.603289	-	-	-
1	A0A060XLW3	Plastin-2; Lymphocyte cytosolic protein 1	-	IP<SL	-		actin filament bundle assembly [GO:0051017]; actin binding [GO:0003779]; actin filament binding [GO:0051015]; calcium ion binding [GO:0005509]	-	-	-	-	-	-	-	0.603811	-
1	A0A060WRB4	Actin-depolymerizing factor (Brevin) (Gelsolin)	AS<SL	IP<SL	-	Fc gamma R-mediated phagocytosis[map04666]; Regulation of actin cytoskeleton[map04810]	actin binding [GO:0003779]; barbed-end actin filament capping [GO:0051016]; actin nucleation [GO:0045010]; actin filament severing [GO:0051014]; actin filament binding [GO:0051015]; cell projection organization [GO:0030030]; calcium ion binding [GO:0005509]; GTP binding [GO:0005525]; nucleotide binding [GO:0000166]; membrane [GO:0016020]; integral component of membrane [GO:0016021]; cytoskeleton …	-	-	-	-	0.613941	-	-	-	-
1	A0A060YXK5	Catechol-O-methyltransferase domain-containing protein 1	AS<SL	-	-		O-methyltransferase activity [GO:0008171]; methyltransferase activity [GO:0008168]; transferase activity [GO:0016740]; methylation [GO:0032259]; membrane [GO:0016020]; integral component of membrane [GO:0016021]	-	-	-	-	-	-	-	-	-
1	A0A060Z9B8	Catechol-O-methyltransferase domain-containing protein 1	AS<SL	-	-		O-methyltransferase activity [GO:0008171]; transferase activity [GO:0016740]; methyltransferase activity [GO:0008168]; methylation [GO:0032259]; membrane [GO:0016020]; integral component of membrane [GO:0016021]; oxidoreductase activity [GO:0016491]; catechol O-methyltransferase activity [GO:0016206]; magnesium ion binding [GO:0000287]; L-dopa O-methyltransferase activity [GO:0102084]; metal ion …	-	-	-	-	-	-	-	-	-
1	Q9DFD5	Differentially regulated trout protein; CD59 glycoprotein-like; Phospholipase A2 inhibitor 31 kDa subunit-like	AS<SL	IP<SL	-		negative regulation of activation of membrane attack complex [GO:0001971]	-	secreted	-	-	-	-	-	-	-

## Sheet: Table S2.4.
Table S2.4. Analysis of the correlation between plasma protein abundance (LFQ), IPS, immune gene expression, spleen OTUs and blood cells count.
Row	Column	Spearman correlation	p-value
A0A060VUA9	A0A060VVE5	0.714805	0.00274557
A0A060VUA9	A0A060W748	0.719268	0.00250785
A0A060VUA9	A0A060W754	-0.61654	0.01437
A0A060VUA9	A0A060WC08	0.894669	6.73852e-06
A0A060VUA9	A0A060WCH3	-0.632587	0.0113819
A0A060VUA9	A0A060WGR2	0.836656	0.000100859
A0A060VUA9	A0A060WGU6	0.621522	0.0133841
A0A060VUA9	A0A060WHC7	-0.682358	0.00506697
A0A060VUA9	A0A060WHT8	0.844734	7.4038e-05
A0A060VUA9	A0A060WI78	-0.682445	0.00505911
A0A060VUA9	A0A060WKG4	0.863007	3.43613e-05
A0A060VUA9	A0A060WN18	-0.790334	0.00045365
A0A060VUA9	A0A060WRB4	0.814696	0.000216461
A0A060VUA9	A0A060WUN3	-0.680539	0.00523264
A0A060VUA9	A0A060WW01	-0.636683	0.0107031
A0A060VUA9	A0A060X0D1	-0.697137	0.00386949
A0A060VUA9	A0A060X960	0.601235	0.0177527
A0A060VUA9	A0A060XBB9	0.854223	5.03357e-05
A0A060VUA9	A0A060XE72	-0.686071	0.00474171
A0A060VUA9	A0A060XGG8	0.648843	0.00887208
A0A060VUA9	A0A060XKK4	0.688531	0.00453558
A0A060VUA9	A0A060XMW3	0.673161	0.00594883
A0A060VUA9	A0A060XRC5	-0.70267	0.00348413
A0A060VUA9	A0A060XTF5	0.627054	0.0123515
A0A060VUA9	A0A060XWZ8	-0.66394	0.00695048
A0A060VUA9	A0A060Y572	0.863007	3.43613e-05
A0A060VUA9	A0A060Y9S3	-0.695293	0.00400522
A0A060VUA9	A0A060YC43	-0.619677	0.0137427
A0A060VUA9	A0A060YD01	-0.67685	0.00558166
A0A060VUA9	A0A060YH37	-0.735867	0.00176395
A0A060VUA9	A0A060YNF5	0.858615	4.17196e-05
A0A060VUA9	A0A060YPN6	0.804105	0.000302295
A0A060VUA9	A0A060YST0	0.861379	3.69518e-05
A0A060VUA9	A0A060YU50	-0.732178	0.0019115
A0A060VUA9	A0A060YWQ3	0.936067	2.90736e-07
A0A060VUA9	A0A060YWY3	0.657131	0.00777169
A0A060VUA9	A0A060YY24	0.713736	0.00280515
A0A060VUA9	A0A060YZ84	-0.745088	0.00143482
A0A060VUA9	A0A060YZR6	0.631157	0.0116267
A0A060VUA9	A0A060Z4W3	-0.662688	0.00709616
A0A060VUA9	A0A060Z9H8	0.867399	2.81118e-05
A0A060VUA9	A0A060ZGE4	-0.761136	0.000980915
A0A060VUA9	A0A061A7A8	-0.740217	0.00160188
A0A060VUA9	A0A061A7B4	-0.730334	0.0019889
A0A060VUA9	A5H0J9	-0.756154	0.00110716
A0A060VUA9	B5AXN8	0.68976	0.00443524
A0A060VUA9	C1BF66	0.819767	0.000183112
A0A060VUA9	C1BG12	0.797159	0.00037238
A0A060VUA9	C1BGU6	0.681669	0.00512922
A0A060VUA9	C1BH52	-0.612848	0.015136
A0A060VUA9	C1BHQ1	0.610079	0.015731
A0A060VUA9	D5H440	-0.713736	0.00280515
A0A060VUA9	P11941	0.650689	0.00861705
A0A060VUA9	P79899	-0.748455	0.0013278
A0A060VUA9	Q08G23	0.700604	0.00362426
A0A060VUA9	Q70Z26	0.785662	0.000517199
A0A060VUA9	Q90ZF1	0.935238	3.15491e-07
A0A060VUA9	Q9DFD5	0.680952	0.00519458
A0A060VUA9	S0F2P2	0.944189	1.22627e-07
A0A060VVE5	A0A060WKG4	0.638525	0.0104083
A0A060VVE5	A0A060WRB4	0.611238	0.0154798
A0A060VVE5	A0A060X8X3	0.656701	0.00782601
A0A060VVE5	A0A060XBB9	0.62761	0.0122514
A0A060VVE5	A0A060Y572	0.71493	0.00273872
A0A060VVE5	A0A060YNF5	0.709472	0.00305292
A0A060VVE5	A0A060YST0	0.610163	0.0157125
A0A060VVE5	A0A060Z9H8	0.676727	0.00559358
A0A060VVE5	C1BGU6	0.664706	0.00686256
A0A060VVE5	Q08G23	0.676471	0.00561857
A0A060VWC6	A0A060W7E7	0.743521	0.00148694
A0A060VWC6	A0A060X0D1	0.600536	0.0179204
A0A060VWC6	A0A060XA94	0.779268	0.000615759
A0A060VWC6	A0A060XKA1	0.673816	0.00588229
A0A060VWC6	A0A060XNR6	0.739947	0.00161157
A0A060VWC6	A0A060XPI6	0.618068	0.0140617
A0A060VWC6	A0A060XUR3	0.716458	0.00265554
A0A060VWC6	A0A060YU50	0.613048	0.0150937
A0A060VWC6	P79825	0.741734	0.00154825
A0A060VWW1	A0A060W754	0.739947	0.00161157
A0A060VWW1	A0A060WCH3	0.867857	2.75181e-05
A0A060VWW1	A0A060WGR2	-0.62936	0.01194
A0A060VWW1	A0A060WHT8	-0.660775	0.00732329
A0A060VWW1	A0A060WN18	0.673839	0.00587994
A0A060VWW1	A0A060WUN3	0.710714	0.00297899
A0A060VWW1	A0A060WXK2	0.610714	0.0155928
A0A060VWW1	A0A060XBB9	-0.620855	0.0135128
A0A060VWW1	A0A060XKA1	0.721429	0.00239887
A0A060VWW1	A0A060XRC5	0.710714	0.00297899
A0A060VWW1	A0A060Y2D3	0.709682	0.00304033
A0A060VWW1	A0A060Y5T9	0.853571	5.17314e-05
A0A060VWW1	A0A060YST0	-0.632571	0.0113847
A0A060VWW1	A5H0J9	0.778571	0.00062735
A0A060VWW1	C1BG12	-0.761193	0.000979532
A0A060VWW1	C4B4C5	0.771429	0.000756875
A0A060VWW1	D5H440	0.892857	7.49474e-06
A0A060VWW1	P79825	0.678571	0.00541655
A0A060VWW1	P79899	0.688925	0.00450321
A0A060VWW1	Q3LA41	0.608098	0.0161675
A0A060VWW1	Q9PT14	-0.75	0.0012809
A0A060VWW1	Q9YGE8	-0.657143	0.00777025
A0A060VXZ0	A0A060W7T7	0.642857	0.00973994
A0A060VXZ0	A0A060WHF0	0.646429	0.00921455
A0A060VXZ0	A0A060XVF4	0.671429	0.00612777
A0A060VXZ0	A0A060XWZ8	0.621429	0.013402
A0A060VXZ0	C1BEH9	-0.604367	0.017015
A0A060VXZ0	C1BGI7	-0.604111	0.0170744
A0A060VXZ0	P14527	-0.634495	0.0110616
A0A060VXZ0	P98093	0.614286	0.014834
A0A060VXZ0	Q98974	-0.632143	0.0114575
A0A060VXZ0	Q98977	0.735714	0.00176987
A0A060VZH2	A0A060W754	-0.613185	0.0150647
A0A060VZH2	A0A060WC08	0.620001	0.0136793
A0A060VZH2	A0A060WCH3	-0.621647	0.01336
A0A060VZH2	A0A060WGR2	0.753056	0.00119207
A0A060VZH2	A0A060WGU6	0.66309	0.0070491
A0A060VZH2	A0A060WHF0	0.727957	0.00209233
A0A060VZH2	A0A060WHT8	0.676919	0.00557499
A0A060VZH2	A0A060WKG4	0.735892	0.00176297
A0A060VZH2	A0A060WRB4	0.77451	0.000698562
A0A060VZH2	A0A060WW01	-0.673423	0.00592219
A0A060VZH2	A0A060XBB9	0.697274	0.00385956
A0A060VZH2	A0A060XEG1	0.666694	0.00663843
A0A060VZH2	A0A060XGG8	0.669093	0.00637561
A0A060VZH2	A0A060XKK4	0.648353	0.00894076
A0A060VZH2	A0A060XTF5	0.677505	0.00551837
A0A060VZH2	A0A060Y572	0.714438	0.00276593
A0A060VZH2	A0A060YH37	-0.625251	0.0126811
A0A060VZH2	A0A060YNF5	0.735892	0.00176297
A0A060VZH2	A0A060YST0	0.605771	0.0166922
A0A060VZH2	A0A060YU50	-0.657684	0.00770229
A0A060VZH2	A0A060YY24	0.627052	0.0123519
A0A060VZH2	A0A060YZ84	-0.756787	0.00109041
A0A060VZH2	A0A060Z9H8	0.723019	0.00232106
A0A060VZH2	A5H0J9	-0.731561	0.00193712
A0A060VZH2	C1BF66	0.668788	0.00640862
A0A060VZH2	C1BG12	0.608798	0.0160122
A0A060VZH2	C1BGU6	0.628996	0.0120042
A0A060VZH2	C1BH52	-0.645648	0.00932745
A0A060VZH2	D5H440	-0.646873	0.00915074
A0A060VZH2	Q08G23	0.665996	0.00671642
A0A060W1F1	A0A060XPE1	0.614286	0.014834
A0A060W1F1	C4B4C5	-0.635714	0.0108607
A0A060W1F1	P98093	0.678571	0.00541655
A0A060W1F1	Q3LA41	-0.631486	0.01157
A0A060W2L1	A0A060Y244	-0.607143	0.0163813
A0A060W2U3	A0A060WXT1	-0.600723	0.0178754
A0A060W2U3	A0A060XE72	-0.684592	0.00486922
A0A060W2U3	A0A060YD01	-0.602154	0.0175336
A0A060W2U3	A0A060ZVC3	-0.634413	0.0110754
A0A060W2U3	A0A061A7B4	-0.652334	0.00839469
A0A060W2U3	P79899	-0.612058	0.0153039
A0A060W3H4	P79899	0.645474	0.00935277
A0A060W748	A0A060VWW1	-0.667857	0.00650996
A0A060W748	A0A060W754	-0.886506	1.07261e-05
A0A060W748	A0A060WC08	0.628542	0.0120848
A0A060W748	A0A060WCH3	-0.803571	0.000307265
A0A060W748	A0A060WGR2	0.795205	0.000394329
A0A060W748	A0A060WGU6	0.807143	0.000275244
A0A060W748	A0A060WHF0	0.667857	0.00650996
A0A060W748	A0A060WHT8	0.846114	7.0109e-05
A0A060W748	A0A060WKG4	0.727166	0.00212772
A0A060W748	A0A060WRB4	0.765438	0.000881531
A0A060W748	A0A060WUN3	-0.735714	0.00176987
A0A060W748	A0A060X0D1	-0.653571	0.00823037
A0A060W748	A0A060X8X3	0.612425	0.0152256
A0A060W748	A0A060XBB9	0.752681	0.0012027
A0A060W748	A0A060XKK4	0.775693	0.000677183
A0A060W748	A0A060XRC5	-0.678571	0.00541655
A0A060W748	A0A060Y2D3	-0.695345	0.00400132
A0A060W748	A0A060Y572	0.744176	0.00146499
A0A060W748	A0A060Y9M1	0.682143	0.00508633
A0A060W748	A0A060YNF5	0.756933	0.00108659
A0A060W748	A0A060YST0	0.781648	0.000577424
A0A060W748	A0A060YY24	0.814286	0.000219366
A0A060W748	A0A060Z9H8	0.739923	0.00161241
A0A060W748	A5H0J9	-0.682143	0.00508633
A0A060W748	C1BF66	0.741357	0.00156143
A0A060W748	C1BG12	0.751509	0.00123639
A0A060W748	C1BGU6	0.650856	0.0085943
A0A060W748	D5H440	-0.817857	0.000195137
A0A060W748	Q08G23	0.632522	0.011393
A0A060W748	Q9PT14	0.721429	0.00239887
A0A060W748	Q9YGE8	0.610714	0.0155928
A0A060W748	S0F2P2	0.69534	0.00400173
A0A060W754	A0A060WC08	-0.677496	0.00551919
A0A060W754	A0A060WGR2	-0.821453	0.000173003
A0A060W754	A0A060WHF0	-0.781055	0.000586793
A0A060W754	A0A060WHT8	-0.828723	0.00013452
A0A060W754	A0A060WKG4	-0.778891	0.000622008
A0A060W754	A0A060WRB4	-0.815069	0.000213852
A0A060W754	A0A060X8X3	-0.707742	0.00315832
A0A060W754	A0A060XBB9	-0.783147	0.000554303
A0A060W754	A0A060XKA1	0.614835	0.0147198
A0A060W754	A0A060XRC5	0.725648	0.00219693
A0A060W754	A0A060Y572	-0.795916	0.000386226
A0A060W754	A0A060Y5T9	0.779268	0.000615759
A0A060W754	A0A060Y9M1	-0.680965	0.00519338
A0A060W754	A0A060YNF5	-0.810813	0.00024524
A0A060W754	A0A060YST0	-0.770249	0.000780214
A0A060W754	A0A060YY24	-0.754245	0.00115887
A0A060W754	A0A060Z9H8	-0.789531	0.000464091
A0A060W754	A5H0J9	0.697051	0.00387573
A0A060W754	C1BF66	-0.699676	0.00368862
A0A060W754	C1BG12	-0.816155	0.000206394
A0A060W754	C1BGU6	-0.706489	0.00323645
A0A060W754	D5H440	0.866846	2.88428e-05
A0A060W754	P79825	0.663092	0.00704883
A0A060W754	Q08G23	-0.706489	0.00323645
A0A060W754	Q9PT14	-0.82395	0.000158882
A0A060W754	Q9YGE8	-0.634495	0.0110616
A0A060W754	S0F2P2	-0.71147	0.00293472
A0A060W7E7	A0A060XA94	0.689286	0.00447373
A0A060W7E7	A0A060XNR6	0.760714	0.000991129
A0A060W7E7	P79825	0.642857	0.00973994
A0A060W7T7	A0A060WCY0	0.7	0.00366607
A0A060W7T7	A0A060XZ25	-0.657143	0.00777025
A0A060W7T7	A0A060YDR3	0.775	0.000689645
A0A060W7T7	A0A060YJC7	-0.6	0.0180501
A0A060W7T7	A0A060YP37	-0.675	0.0057635
A0A060W7T7	A0A060ZVC3	0.610714	0.0155928
A0A060W7T7	C1BEM6	-0.603571	0.0172001
A0A060W7T7	C1BEX3	-0.696429	0.00392119
A0A060W7T7	C1BGI7	-0.650581	0.00863182
A0A060W7T7	P14527	-0.815014	0.000214237
A0A060W7T7	Q6H965	0.614286	0.014834
A0A060W7T7	Q98973	-0.639286	0.0102884
A0A060W7T7	Q98974	-0.771429	0.000756875
A0A060W917	A0A060VWW1	0.782143	0.00056971
A0A060W917	A0A060W1F1	-0.646429	0.00921455
A0A060W917	A0A060W2S2	0.757143	0.00108111
A0A060W917	A0A060WCH3	0.689286	0.00447373
A0A060W917	A0A060XKA1	0.767857	0.00082933
A0A060W917	A0A060Y2D3	0.681008	0.00518948
A0A060W917	A0A060Y5T9	0.753571	0.00117758
A0A060W917	A0A060ZVC3	0.621429	0.013402
A0A060W917	C4B4C5	0.871429	2.32365e-05
A0A060W917	D5H440	0.660714	0.00733057
A0A060W917	P79825	0.635714	0.0108607
A0A060W917	Q3LA41	0.70803	0.00314057
A0A060W917	Q9PT14	-0.639286	0.0102884
A0A060WAQ6	A0A060Y2D6	-0.667857	0.00650996
A0A060WAQ6	C0KIP4	0.721429	0.00239887
A0A060WC08	A0A060VVE5	0.625676	0.0126028
A0A060WC08	A0A060WGR2	0.913903	1.90576e-06
A0A060WC08	A0A060WHT8	0.809091	0.000258964
A0A060WC08	A0A060WKG4	0.942687	1.45192e-07
A0A060WC08	A0A060WRB4	0.889916	8.872e-06
A0A060WC08	A0A060X8X3	0.645455	0.00935559
A0A060WC08	A0A060XBB9	0.933093	3.87895e-07
A0A060WC08	A0A060Y572	0.942687	1.45192e-07
A0A060WC08	A0A060YNF5	0.93789	2.4198e-07
A0A060WC08	A0A060YST0	0.804545	0.000298245
A0A060WC08	A0A060YWY3	0.609641	0.0158266
A0A060WC08	A0A060Z9H8	0.947485	8.32234e-08
A0A060WC08	C1BG12	0.758228	0.0010531
A0A060WC08	C1BGU6	0.744606	0.00145069
A0A060WC08	P79899	-0.615824	0.0145161
A0A060WC08	Q08G23	0.76529	0.000884811
A0A060WC08	S0F2P2	0.957071	2.29806e-08
A0A060WCH3	A0A060VVE5	-0.68294	0.00501481
A0A060WCH3	A0A060W754	0.902592	4.13393e-06
A0A060WCH3	A0A060WC08	-0.612425	0.0152256
A0A060WCH3	A0A060WGR2	-0.776069	0.000670496
A0A060WCH3	A0A060WHF0	-0.725	0.00222703
A0A060WCH3	A0A060WHT8	-0.809852	0.000252822
A0A060WCH3	A0A060WKG4	-0.729292	0.00203373
A0A060WCH3	A0A060WN18	0.659502	0.00747751
A0A060WCH3	A0A060WRB4	-0.746302	0.00139547
A0A060WCH3	A0A060WUN3	0.7	0.00366607
A0A060WCH3	A0A060XA94	0.675	0.0057635
A0A060WCH3	A0A060XBB9	-0.733545	0.00185573
A0A060WCH3	A0A060XKA1	0.767857	0.00082933
A0A060WCH3	A0A060XRC5	0.807143	0.000275244
A0A060WCH3	A0A060XVF4	-0.610714	0.0155928
A0A060WCH3	A0A060Y2D3	0.76703	0.000846887
A0A060WCH3	A0A060Y572	-0.750554	0.0012644
A0A060WCH3	A0A060Y5T9	0.842857	7.9672e-05
A0A060WCH3	A0A060YNF5	-0.767564	0.000835516
A0A060WCH3	A0A060YST0	-0.765532	0.000879455
A0A060WCH3	A0A060YY24	-0.657143	0.00777025
A0A060WCH3	A0A060Z9H8	-0.746302	0.00139547
A0A060WCH3	A5H0J9	0.835714	0.000104447
A0A060WCH3	C1BF66	-0.656746	0.00782039
A0A060WCH3	C1BG12	-0.823174	0.000163169
A0A060WCH3	C1BGU6	-0.627938	0.0121925
A0A060WCH3	C4B4C5	0.646429	0.00921455
A0A060WCH3	D5H440	0.914286	1.85311e-06
A0A060WCH3	P79825	0.817857	0.000195137
A0A060WCH3	P79899	0.703983	0.0033973
A0A060WCH3	Q08G23	-0.637105	0.0106349
A0A060WCH3	Q9PT14	-0.889286	9.19297e-06
A0A060WCH3	Q9YGE8	-0.657143	0.00777025
A0A060WCH3	S0F2P2	-0.693403	0.00414821
A0A060WCI5	A0A060Y7H2	-0.614286	0.014834
A0A060WCI5	D0FZZ1	-0.754986	0.00113858
A0A060WCI5	Q2L4Q6	0.717857	0.00258117
A0A060WCY0	A0A060W917	0.646429	0.00921455
A0A060WCY0	A0A060WXK2	0.635714	0.0108607
A0A060WCY0	A0A060XA94	0.603571	0.0172001
A0A060WCY0	A0A060XKA1	0.725	0.00222703
A0A060WCY0	A0A060XPI6	0.713137	0.00283893
A0A060WCY0	A0A060XYF3	0.675	0.0057635
A0A060WCY0	A0A060Y2D3	0.605739	0.0166996
A0A060WCY0	A0A060Y5T9	0.660714	0.00733057
A0A060WCY0	A0A060YDR3	0.8	0.00034227
A0A060WCY0	C4B4C5	0.717857	0.00258117
A0A060WCY0	Q3LA41	0.603845	0.0171362
A0A060WE68	A0A060VUA9	0.954677	3.25135e-08
A0A060WE68	A0A060VVE5	0.601246	0.0177499
A0A060WE68	A0A060W748	0.675703	0.00569385
A0A060WE68	A0A060WC08	0.88223	1.34958e-05
A0A060WE68	A0A060WCI5	-0.645071	0.00941155
A0A060WE68	A0A060WGR2	0.81742	0.000197981
A0A060WE68	A0A060WHT8	0.784657	0.000531785
A0A060WE68	A0A060WKG4	0.826002	0.000148003
A0A060WE68	A0A060WN18	-0.716105	0.00267459
A0A060WE68	A0A060WRB4	0.77022	0.000780802
A0A060WE68	A0A060WUI1	0.954677	3.25135e-08
A0A060WE68	A0A060WUN3	-0.630656	0.0117133
A0A060WE68	A0A060X9D3	0.632122	0.0114611
A0A060WE68	A0A060XBB9	0.847456	6.64549e-05
A0A060WE68	A0A060XKK4	0.639336	0.0102806
A0A060WE68	A0A060XMW3	0.717146	0.00261874
A0A060WE68	A0A060XTF5	0.625251	0.0126811
A0A060WE68	A0A060XUK2	0.742134	0.00153434
A0A060WE68	A0A060XWZ8	-0.661288	0.00726179
A0A060WE68	A0A060Y572	0.830292	0.000127218
A0A060WE68	A0A060Y5Z9	-0.734019	0.00183669
A0A060WE68	A0A060Y7H2	0.69192	0.0042632
A0A060WE68	A0A060Y9S3	-0.625251	0.0126811
A0A060WE68	A0A060YC43	-0.614439	0.014802
A0A060WE68	A0A060YH37	-0.740571	0.00158923
A0A060WE68	A0A060YNF5	0.81742	0.000197981
A0A060WE68	A0A060YPN6	0.828862	0.000133859
A0A060WE68	A0A060YST0	0.788722	0.000474815
A0A060WE68	A0A060YU50	-0.632458	0.0114039
A0A060WE68	A0A060YVB2	0.831853	0.000120282
A0A060WE68	A0A060YWQ3	0.934545	3.37507e-07
A0A060WE68	A0A060YWY3	0.645932	0.00928628
A0A060WE68	A0A060YY24	0.753184	0.00118846
A0A060WE68	A0A060YZ84	-0.758589	0.0010439
A0A060WE68	A0A060Z9H8	0.834583	0.000108896
A0A060WE68	A0A060ZGE4	-0.665455	0.00677746
A0A060WE68	A0A061A7A8	-0.753857	0.00116962
A0A060WE68	A0A061A7B4	-0.706335	0.00324615
A0A060WE68	A5H0J9	-0.72075	0.00243269
A0A060WE68	C1BF66	0.804984	0.00029425
A0A060WE68	C1BG12	0.706518	0.00323459
A0A060WE68	C1BGU6	0.642871	0.00973783
A0A060WE68	C1BHQ1	0.664585	0.00687643
A0A060WE68	D0FZZ1	0.706364	0.00324434
A0A060WE68	D5H440	-0.673901	0.0058737
A0A060WE68	P0DMV4	0.634889	0.0109964
A0A060WE68	P79899	-0.621085	0.0134683
A0A060WE68	Q08G23	0.633621	0.0112075
A0A060WE68	Q70Z26	0.754986	0.00113858
A0A060WE68	Q90ZF1	0.932345	4.16175e-07
A0A060WE68	S0F2P2	0.897073	5.83424e-06
A0A060WFS6	Q7ZZW1	0.714286	0.00277438
A0A060WFW3	A0A060XAE5	0.614286	0.014834
A0A060WFW3	A0A060YV53	0.667857	0.00650996
A0A060WGR2	A0A060WHT8	0.899511	5.02289e-06
A0A060WGR2	A0A060WKG4	0.95443	3.36597e-08
A0A060WGR2	A0A060WRB4	0.934177	3.49726e-07
A0A060WGR2	A0A060X8X3	0.60687	0.0164428
A0A060WGR2	A0A060XBB9	0.964557	6.73479e-09
A0A060WGR2	A0A060Y572	0.95443	3.36597e-08
A0A060WGR2	A0A060YNF5	0.964557	6.73479e-09
A0A060WGR2	A0A060YST0	0.834746	0.000108246
A0A060WGR2	A0A060Z9H8	0.964557	6.73479e-09
A0A060WGR2	C1BGU6	0.73676	0.00172966
A0A060WGR2	Q08G23	0.747674	0.00135202
A0A060WGU6	A0A060VVE5	0.609605	0.0158346
A0A060WGU6	A0A060W3H4	-0.661253	0.00726595
A0A060WGU6	A0A060W754	-0.798928	0.000353391
A0A060WGU6	A0A060WC08	0.612425	0.0152256
A0A060WGU6	A0A060WCH3	-0.810714	0.000246008
A0A060WGU6	A0A060WGR2	0.790952	0.000445741
A0A060WGU6	A0A060WHF0	0.782143	0.00056971
A0A060WGU6	A0A060WHT8	0.842085	8.209e-05
A0A060WGU6	A0A060WKG4	0.731418	0.00194309
A0A060WGU6	A0A060WRB4	0.782448	0.000564998
A0A060WGU6	A0A060WUN3	-0.703571	0.00342434
A0A060WGU6	A0A060XA94	-0.642857	0.00973994
A0A060WGU6	A0A060XAE5	0.65	0.00871158
A0A060WGU6	A0A060XBB9	0.744176	0.00146499
A0A060WGU6	A0A060XEG1	0.660714	0.00733057
A0A060WGU6	A0A060XRC5	-0.757143	0.00108111
A0A060WGU6	A0A060Y2D3	-0.663087	0.00704948
A0A060WGU6	A0A060Y572	0.752681	0.0012027
A0A060WGU6	A0A060YH37	-0.607143	0.0163813
A0A060WGU6	A0A060YNF5	0.76969	0.000791469
A0A060WGU6	A0A060YST0	0.777619	0.000643494
A0A060WGU6	A0A060YY24	0.732143	0.00191296
A0A060WGU6	A0A060Z9H8	0.744176	0.00146499
A0A060WGU6	A5H0J9	-0.685714	0.00477225
A0A060WGU6	C0KIP4	0.617857	0.0141039
A0A060WGU6	C1BF66	0.733299	0.00186566
A0A060WGU6	C1BG12	0.72633	0.00216564
A0A060WGU6	C1BGU6	0.68294	0.00501481
A0A060WGU6	D5H440	-0.696429	0.00392119
A0A060WGU6	P79825	-0.714286	0.00277438
A0A060WGU6	P79899	-0.673866	0.00587723
A0A060WGU6	Q08G23	0.673773	0.00588662
A0A060WGU6	Q9PT14	0.764286	0.00090731
A0A060WGU6	S0F2P2	0.681781	0.005119
A0A060WHC7	A0A060VWW1	0.820686	0.000177541
A0A060WHC7	A0A060W748	-0.737865	0.00168795
A0A060WHC7	A0A060W754	0.749828	0.00128604
A0A060WHC7	A0A060WCH3	0.843274	7.8391e-05
A0A060WHC7	A0A060WGR2	-0.672369	0.00603017
A0A060WHC7	A0A060WGU6	-0.613632	0.0149706
A0A060WHC7	A0A060WHT8	-0.764471	0.000903128
A0A060WHC7	A0A060WI78	0.717753	0.00258664
A0A060WHC7	A0A060WKG4	-0.672369	0.00603017
A0A060WHC7	A0A060WN18	0.698955	0.00373933
A0A060WHC7	A0A060WRB4	-0.672369	0.00603017
A0A060WHC7	A0A060WUN3	0.760452	0.000997511
A0A060WHC7	A0A060WW01	0.716901	0.00263178
A0A060WHC7	A0A060X0D1	0.662572	0.00710968
A0A060WHC7	A0A060X960	-0.613632	0.0149706
A0A060WHC7	A0A060XBB9	-0.672369	0.00603017
A0A060WHC7	A0A060XE72	0.624926	0.0127411
A0A060WHC7	A0A060XGG8	-0.796928	0.000374924
A0A060WHC7	A0A060XKK4	-0.73664	0.0017342
A0A060WHC7	A0A060XRC5	0.805628	0.000288476
A0A060WHC7	A0A060XTF5	-0.711512	0.00293225
A0A060WHC7	A0A060Y0R7	-0.681396	0.00515407
A0A060WHC7	A0A060Y572	-0.672369	0.00603017
A0A060WHC7	A0A060Y5T9	0.632456	0.0114043
A0A060WHC7	A0A060YD01	0.696454	0.00391932
A0A060WHC7	A0A060YNF5	-0.672369	0.00603017
A0A060WHC7	A0A060YST0	-0.764471	0.000903128
A0A060WHC7	A0A060YU50	0.752923	0.00119582
A0A060WHC7	A0A060YWQ3	-0.670468	0.00622877
A0A060WHC7	A0A060YXK5	-0.802888	0.000313723
A0A060WHC7	A0A060YY24	-0.639985	0.0101792
A0A060WHC7	A0A060YZR6	-0.759405	0.00102339
A0A060WHC7	A0A060Z4W3	0.685773	0.00476724
A0A060WHC7	A0A060Z9H8	-0.672369	0.00603017
A0A060WHC7	A0A061AD33	-0.632456	0.0114043
A0A060WHC7	A5H0J9	0.824451	0.000156168
A0A060WHC7	B5AXN8	-0.873391	2.11296e-05
A0A060WHC7	C1BG12	-0.783994	0.000541583
A0A060WHC7	C1BH52	0.787508	0.000491277
A0A060WHC7	D5H440	0.805628	0.000288476
A0A060WHC7	P11941	-0.689541	0.004453
A0A060WHC7	P79899	0.742063	0.00153679
A0A060WHC7	Q70Z26	-0.63622	0.0107782
A0A060WHC7	Q92004	0.651279	0.00853684
A0A060WHC7	Q9DFD5	-0.727071	0.00213201
A0A060WHC7	Q9PT14	-0.809392	0.000256516
A0A060WHC7	Q9YGE8	-0.843274	7.8391e-05
A0A060WHC7	S0F2P2	-0.65537	0.00799611
A0A060WHC7	W8W0X1	0.739605	0.00162389
A0A060WHF0	A0A060VVE5	0.600438	0.0179443
A0A060WHF0	A0A060WC08	0.600338	0.0179683
A0A060WHF0	A0A060WGR2	0.69102	0.0043342
A0A060WHF0	A0A060WHT8	0.789707	0.000461799
A0A060WHF0	A0A060WKG4	0.720787	0.00243082
A0A060WHF0	A0A060WRB4	0.788826	0.000473425
A0A060WHF0	A0A060X8X3	0.672862	0.00597943
A0A060WHF0	A0A060XAE5	0.664286	0.00691068
A0A060WHF0	A0A060XBB9	0.686768	0.00468259
A0A060WHF0	A0A060XEG1	0.735714	0.00176987
A0A060WHF0	A0A060Y572	0.729292	0.00203373
A0A060WHF0	A0A060Y9M1	0.671429	0.00612777
A0A060WHF0	A0A060YNF5	0.737797	0.00169048
A0A060WHF0	A0A060YST0	0.777619	0.000643494
A0A060WHF0	A0A060Z9H8	0.712282	0.00288772
A0A060WHF0	A5H0J9	-0.678571	0.00541655
A0A060WHF0	C1BEH9	-0.745386	0.00142507
A0A060WHF0	C1BF66	0.632571	0.0113847
A0A060WHF0	C1BG12	0.751509	0.00123639
A0A060WHF0	C1BGU6	0.765443	0.000881412
A0A060WHF0	D5H440	-0.735714	0.00176987
A0A060WHF0	P62797	-0.603736	0.0171617
A0A060WHF0	P69069	-0.737328	0.0017081
A0A060WHF0	Q08G23	0.77461	0.000696738
A0A060WHF0	Q804V3	-0.627938	0.0121925
A0A060WHF0	Q9YGE8	0.621429	0.013402
A0A060WHF0	S0F2P2	0.660476	0.00735931
A0A060WHT8	A0A060WKG4	0.880321	1.49115e-05
A0A060WHT8	A0A060WRB4	0.909106	2.67912e-06
A0A060WHT8	A0A060XBB9	0.865929	3.00886e-05
A0A060WHT8	A0A060Y572	0.856334	4.60273e-05
A0A060WHT8	A0A060YNF5	0.865929	3.00886e-05
A0A060WHT8	A0A060YST0	0.963636	7.9386e-09
A0A060WHT8	A0A060Z9H8	0.865929	3.00886e-05
A0A060WHT8	C1BGU6	0.749777	0.00128758
A0A060WHT8	Q08G23	0.760119	0.00100569
A0A060WI78	A0A060VWC6	0.693627	0.00413101
A0A060WI78	A0A060VWW1	0.616455	0.0143872
A0A060WI78	A0A060W3H4	0.652445	0.00837982
A0A060WI78	A0A060W748	-0.68092	0.00519751
A0A060WI78	A0A060W7E7	0.725241	0.00221582
A0A060WI78	A0A060WCH3	0.608396	0.0161012
A0A060WI78	A0A060WHT8	-0.613636	0.0149698
A0A060WI78	A0A060WN18	0.634842	0.0110042
A0A060WI78	A0A060WN38	0.688979	0.0044988
A0A060WI78	A0A060WUN3	0.697037	0.00387677
A0A060WI78	A0A060WW01	0.623664	0.0129767
A0A060WI78	A0A060X0D1	0.72927	0.0020347
A0A060WI78	A0A060X960	-0.612425	0.0152256
A0A060WI78	A0A060XA94	0.721212	0.00240964
A0A060WI78	A0A060XGG8	-0.617006	0.0142754
A0A060WI78	A0A060XNR6	0.608396	0.0161012
A0A060WI78	A0A060XPI6	0.600875	0.017839
A0A060WI78	A0A060YCI1	0.672862	0.00597943
A0A060WI78	A0A060YD01	0.709124	0.00307388
A0A060WI78	A0A060YST0	-0.613636	0.0149698
A0A060WI78	A0A060YU50	0.693008	0.0041786
A0A060WI78	A0A060YXK5	-0.626268	0.0124943
A0A060WI78	A5H0J9	0.616455	0.0143872
A0A060WI78	B5AXN8	-0.68495	0.00483817
A0A060WI78	C1BF66	-0.613636	0.0149698
A0A060WI78	D5H440	0.612425	0.0152256
A0A060WI78	P79899	0.692271	0.00423577
A0A060WI78	Q70Z26	-0.749415	0.00129849
A0A060WI78	Q9YGE8	-0.628542	0.0120848
A0A060WJ96	A0A060Y9M1	-0.603571	0.0172001
A0A060WJB1	A0A061A7B4	0.732143	0.00191296
A0A060WJB1	O57523	0.635714	0.0108607
A0A060WKG4	A0A060WRB4	0.944304	1.21029e-07
A0A060WKG4	A0A060X8X3	0.69802	0.00380579
A0A060WKG4	A0A060XBB9	0.974684	7.74643e-10
A0A060WKG4	A0A060Y572	0.98481	2.86846e-11
A0A060WKG4	A0A060YNF5	0.979747	1.83855e-10
A0A060WKG4	A0A060YST0	0.887517	1.01455e-05
A0A060WKG4	A0A060Z9H8	0.994937	2.33147e-14
A0A060WKG4	C1BGU6	0.780419	0.000596962
A0A060WKG4	Q08G23	0.813164	0.000227464
A0A060WN18	A0A060VVE5	-0.630193	0.0117939
A0A060WN18	A0A060WC08	-0.646973	0.00913643
A0A060WN18	A0A060WGR2	-0.640155	0.0101527
A0A060WN18	A0A060WHT8	-0.671235	0.00614806
A0A060WN18	A0A060WUN3	0.702513	0.00349458
A0A060WN18	A0A060XBB9	-0.618817	0.0139126
A0A060WN18	A0A060Y572	-0.601746	0.0176306
A0A060WN18	A0A060YNF5	-0.606014	0.0166369
A0A060WN18	A0A060YST0	-0.64293	0.00972907
A0A060WN18	A0A060Z9H8	-0.601746	0.0176306
A0A060WN18	A5H0J9	0.813625	0.000224105
A0A060WN18	C1BG12	-0.620083	0.0136632
A0A060WN18	D5H440	0.630828	0.0116835
A0A060WN18	P79899	0.793408	0.000415427
A0A060WN18	Q7ZZW1	0.734772	0.00180677
A0A060WN18	S0F2P2	-0.765871	0.000872005
A0A060WN38	A0A060W917	0.696429	0.00392119
A0A060WN38	A0A060WXK2	0.614286	0.014834
A0A060WN38	A0A060X0D1	0.603571	0.0172001
A0A060WN38	A0A060XPI6	0.73101	0.00196024
A0A060WN38	A0A060YDR3	0.646429	0.00921455
A0A060WN38	C4B4C5	0.821429	0.000173148
A0A060WN38	P62797	-0.61101	0.0155289
A0A060WN38	Q70Z26	-0.642857	0.00973994
A0A060WN38	Q7ZZW1	0.6	0.0180501
A0A060WN38	Q92093	0.669202	0.00636395
A0A060WN38	Q9DDV9	0.685714	0.00477225
A0A060WN38	Q9I9M6	0.681396	0.00515407
A0A060WN38	Q9PT02	-0.6	0.0180501
A0A060WQM5	A0A060WJ96	0.771429	0.000756875
A0A060WRB4	A0A060X8X3	0.745994	0.00140536
A0A060WRB4	A0A060XBB9	0.908861	2.72472e-06
A0A060WRB4	A0A060Y572	0.949367	6.59463e-08
A0A060WRB4	A0A060YNF5	0.964557	6.73479e-09
A0A060WRB4	A0A060YST0	0.858733	4.15065e-05
A0A060WRB4	A0A060Z9H8	0.939241	2.10451e-07
A0A060WRB4	C1BGU6	0.905941	3.32041e-06
A0A060WRB4	Q08G23	0.927771	6.29623e-07
A0A060WRW9	A0A060VWC6	-0.638673	0.0103849
A0A060WRW9	A0A060WJ96	0.726571	0.00215465
A0A060WUI1	A0A060VVE5	0.714805	0.00274557
A0A060WUI1	A0A060W748	0.719268	0.00250785
A0A060WUI1	A0A060W754	-0.61654	0.01437
A0A060WUI1	A0A060WC08	0.894669	6.73852e-06
A0A060WUI1	A0A060WCH3	-0.632587	0.0113819
A0A060WUI1	A0A060WGR2	0.836656	0.000100859
A0A060WUI1	A0A060WGU6	0.621522	0.0133841
A0A060WUI1	A0A060WHC7	-0.682358	0.00506697
A0A060WUI1	A0A060WHT8	0.844734	7.4038e-05
A0A060WUI1	A0A060WI78	-0.682445	0.00505911
A0A060WUI1	A0A060WKG4	0.863007	3.43613e-05
A0A060WUI1	A0A060WN18	-0.790334	0.00045365
A0A060WUI1	A0A060WRB4	0.814696	0.000216461
A0A060WUI1	A0A060WUN3	-0.680539	0.00523264
A0A060WUI1	A0A060WW01	-0.636683	0.0107031
A0A060WUI1	A0A060X0D1	-0.697137	0.00386949
A0A060WUI1	A0A060X960	0.601235	0.0177527
A0A060WUI1	A0A060XBB9	0.854223	5.03357e-05
A0A060WUI1	A0A060XE72	-0.686071	0.00474171
A0A060WUI1	A0A060XGG8	0.648843	0.00887208
A0A060WUI1	A0A060XKK4	0.688531	0.00453558
A0A060WUI1	A0A060XMW3	0.673161	0.00594883
A0A060WUI1	A0A060XRC5	-0.70267	0.00348413
A0A060WUI1	A0A060XTF5	0.627054	0.0123515
A0A060WUI1	A0A060XWZ8	-0.66394	0.00695048
A0A060WUI1	A0A060Y572	0.863007	3.43613e-05
A0A060WUI1	A0A060Y9S3	-0.695293	0.00400522
A0A060WUI1	A0A060YC43	-0.619677	0.0137427
A0A060WUI1	A0A060YD01	-0.67685	0.00558166
A0A060WUI1	A0A060YH37	-0.735867	0.00176395
A0A060WUI1	A0A060YNF5	0.858615	4.17196e-05
A0A060WUI1	A0A060YPN6	0.804105	0.000302295
A0A060WUI1	A0A060YST0	0.861379	3.69518e-05
A0A060WUI1	A0A060YU50	-0.732178	0.0019115
A0A060WUI1	A0A060YWQ3	0.936067	2.90736e-07
A0A060WUI1	A0A060YWY3	0.657131	0.00777169
A0A060WUI1	A0A060YY24	0.713736	0.00280515
A0A060WUI1	A0A060YZ84	-0.745088	0.00143482
A0A060WUI1	A0A060YZR6	0.631157	0.0116267
A0A060WUI1	A0A060Z4W3	-0.662688	0.00709616
A0A060WUI1	A0A060Z9H8	0.867399	2.81118e-05
A0A060WUI1	A0A060ZGE4	-0.761136	0.000980915
A0A060WUI1	A0A061A7A8	-0.740217	0.00160188
A0A060WUI1	A0A061A7B4	-0.730334	0.0019889
A0A060WUI1	A5H0J9	-0.756154	0.00110716
A0A060WUI1	B5AXN8	0.68976	0.00443524
A0A060WUI1	C1BF66	0.819767	0.000183112
A0A060WUI1	C1BG12	0.797159	0.00037238
A0A060WUI1	C1BGU6	0.681669	0.00512922
A0A060WUI1	C1BH52	-0.612848	0.015136
A0A060WUI1	D5H440	-0.713736	0.00280515
A0A060WUI1	P11941	0.650689	0.00861705
A0A060WUI1	P79899	-0.748455	0.0013278
A0A060WUI1	Q08G23	0.700604	0.00362426
A0A060WUI1	Q70Z26	0.785662	0.000517199
A0A060WUI1	Q90ZF1	0.935238	3.15491e-07
A0A060WUI1	Q9DFD5	0.680952	0.00519458
A0A060WUI1	S0F2P2	0.944189	1.22627e-07
A0A060WUN3	A0A060W3H4	0.705904	0.00327345
A0A060WUN3	A0A060WGR2	-0.676137	0.00565122
A0A060WUN3	A0A060WHT8	-0.781648	0.000577424
A0A060WUN3	A0A060WRB4	-0.620855	0.0135128
A0A060WUN3	A0A060XBB9	-0.620855	0.0135128
A0A060WUN3	A0A060YST0	-0.713153	0.002838
A0A060WUN3	A0A060YWY3	-0.602369	0.0174827
A0A060WUN3	A5H0J9	0.764286	0.00090731
A0A060WUN3	C1BF66	-0.68495	0.00483817
A0A060WUN3	C1BG12	-0.749572	0.00129375
A0A060WUN3	D5H440	0.757143	0.00108111
A0A060WUN3	P79899	0.798099	0.000362194
A0A060WUV2	Q6XZB7	0.621437	0.0134004
A0A060WW01	A0A060W3H4	0.833615	0.000112829
A0A060WW01	A0A060WCH3	0.651017	0.00857241
A0A060WW01	A0A060WGR2	-0.701535	0.00356054
A0A060WW01	A0A060WGU6	-0.771037	0.000764568
A0A060WW01	A0A060WHT8	-0.742652	0.00151651
A0A060WW01	A0A060WKG4	-0.701535	0.00356054
A0A060WW01	A0A060WN18	0.649704	0.0087524
A0A060WW01	A0A060WRB4	-0.688544	0.00453448
A0A060WW01	A0A060WUN3	0.800132	0.000340918
A0A060WW01	A0A060X0D1	0.760126	0.00100553
A0A060WW01	A0A060XAE5	-0.603736	0.0171617
A0A060WW01	A0A060XBB9	-0.727518	0.00211192
A0A060WW01	A0A060XE72	0.629195	0.0119691
A0A060WW01	A0A060XKK4	-0.657059	0.00778081
A0A060WW01	A0A060XRC5	0.738304	0.0016716
A0A060WW01	A0A060XTF5	-0.658291	0.00762675
A0A060WW01	A0A060Y4C1	0.677718	0.00549793
A0A060WW01	A0A060Y572	-0.701535	0.00356054
A0A060WW01	A0A060YH37	0.603736	0.0171617
A0A060WW01	A0A060YNF5	-0.688544	0.00453448
A0A060WW01	A0A060YST0	-0.738549	0.00166253
A0A060WW01	A0A060YU50	0.792858	0.000422063
A0A060WW01	A0A060YZ84	0.774674	0.000695582
A0A060WW01	A0A060Z9H8	-0.701535	0.00356054
A0A060WW01	A0A060Z9P5	0.667467	0.00655284
A0A060WW01	A5H0J9	0.741941	0.00154105
A0A060WW01	C1BF66	-0.677003	0.0055668
A0A060WW01	C1BG12	-0.672596	0.00600679
A0A060WW01	C1BGU6	-0.60212	0.0175417
A0A060WW01	D5H440	0.603736	0.0171617
A0A060WW01	P79899	0.866416	2.94219e-05
A0A060WW01	Q9PT14	-0.632832	0.0113405
A0A060WX05	A0A060XAE5	-0.610836	0.0155666
A0A060WX05	A0A061A8T0	0.613029	0.0150977
A0A060WX26	A0A060VM28	-0.619845	0.0137098
A0A060WX26	A0A060VXZ0	-0.600024	0.0180442
A0A060WX26	A0A060XPE1	-0.645071	0.00941155
A0A060WX26	A0A060XSJ5	0.612637	0.0151806
A0A060WX26	A0A060YCI1	-0.63426	0.0111008
A0A060WX26	A0A060YDK5	0.790912	0.000446261
A0A060WX26	A0A060YJ35	0.619547	0.0137683
A0A060WX26	A0A060YJC7	0.672099	0.006058
A0A060WX26	A0A060YP37	0.643269	0.00967814
A0A060WX26	A0A060YSX4	-0.847638	6.59709e-05
A0A060WX26	A0A060YTC6	-0.652279	0.00840208
A0A060WX26	C1BEH9	0.63423	0.0111057
A0A060WX26	C1BEM6	0.619845	0.0137098
A0A060WX26	C1BEX3	0.693722	0.00412379
A0A060WX26	C1BGI7	0.715082	0.00273033
A0A060WX26	P14527	0.715984	0.00268112
A0A060WX26	P98093	-0.655882	0.00793026
A0A060WX26	Q7T2K6	0.65413	0.00815698
A0A060WX26	Q98973	0.677505	0.00551837
A0A060WX26	Q98974	0.63426	0.0111008
A0A060WX77	Q70W32	-0.614286	0.014834
A0A060WXK2	A0A060WC08	-0.656746	0.00782039
A0A060WXK2	A0A060WGR2	-0.639991	0.0101782
A0A060WXK2	A0A060XKA1	0.607143	0.0163813
A0A060WXK2	A0A060Y5T9	0.685714	0.00477225
A0A060WXK2	A0A060YNF5	-0.610224	0.0156993
A0A060WXK2	C4B4C5	0.728571	0.00206521
A0A060WXK2	Q3LA41	0.625108	0.0127076
A0A060WXT1	A0A060WFS6	0.609868	0.015777
A0A060WXT1	A0A060WUN3	0.677631	0.00550627
A0A060WXT1	A0A060X083	0.771744	0.000750738
A0A060WXT1	A0A060X0D1	0.760452	0.000997511
A0A060WXT1	A0A060XKA1	0.609868	0.015777
A0A060WXT1	A0A060XPI6	0.651861	0.00845818
A0A060WXT1	A0A060Y4C1	0.63875	0.0103727
A0A060WXT1	A0A060Z9P5	0.657074	0.00777895
A0A060WXT1	C1BH52	0.640557	0.0100905
A0A060WXT1	E7BAR3	0.63622	0.0107782
A0A060WXT1	P79825	0.624926	0.0127411
A0A060WXT1	P79899	0.65873	0.00757235
A0A060WXT1	Q804V3	0.777859	0.000639388
A0A060WZY4	A0A060W754	0.620197	0.013641
A0A060WZY4	A0A060X8X3	-0.620484	0.013585
A0A060WZY4	D5H440	0.610714	0.0155928
A0A060X083	A0A060Z9P5	0.651266	0.00853856
A0A060X083	Q804V3	0.770582	0.00077357
A0A060X0D1	A0A060VVE5	-0.637105	0.0106349
A0A060X0D1	A0A060VWW1	0.739286	0.00163551
A0A060X0D1	A0A060W3H4	0.686768	0.00468259
A0A060X0D1	A0A060W754	0.605898	0.0166632
A0A060X0D1	A0A060WCH3	0.771429	0.000756875
A0A060X0D1	A0A060WGR2	-0.697399	0.00385052
A0A060X0D1	A0A060WGU6	-0.728571	0.00206521
A0A060X0D1	A0A060WHT8	-0.701066	0.00359254
A0A060X0D1	A0A060WKG4	-0.620855	0.0135128
A0A060X0D1	A0A060WN18	0.724019	0.00227322
A0A060X0D1	A0A060WRB4	-0.637865	0.0105132
A0A060X0D1	A0A060WUN3	0.821429	0.000173148
A0A060X0D1	A0A060XA94	0.739286	0.00163551
A0A060X0D1	A0A060XBB9	-0.650622	0.00862621
A0A060X0D1	A0A060XKA1	0.696429	0.00392119
A0A060X0D1	A0A060XRC5	0.825	0.000153236
A0A060X0D1	A0A060Y2D3	0.673839	0.00587994
A0A060X0D1	A0A060Y4C1	0.767564	0.000835516
A0A060X0D1	A0A060Y572	-0.659127	0.00752349
A0A060X0D1	A0A060Y5T9	0.617857	0.0141039
A0A060X0D1	A0A060YNF5	-0.676137	0.00565122
A0A060X0D1	A0A060YST0	-0.640629	0.0100793
A0A060X0D1	A0A060YWY3	-0.689529	0.00445396
A0A060X0D1	A0A060Z9H8	-0.650622	0.00862621
A0A060X0D1	A0A060Z9P5	0.609605	0.0158346
A0A060X0D1	A5H0J9	0.689286	0.00447373
A0A060X0D1	C1BF66	-0.745386	0.00142507
A0A060X0D1	C1BG12	-0.691466	0.00429893
A0A060X0D1	C4B4C5	0.703571	0.00342434
A0A060X0D1	D5H440	0.707143	0.00319548
A0A060X0D1	P79825	0.735714	0.00176987
A0A060X0D1	P79899	0.869626	2.53221e-05
A0A060X0D1	Q7ZZW1	0.792857	0.000422077
A0A060X0D1	Q9PT14	-0.660714	0.00733057
A0A060X0D1	S0F2P2	-0.619801	0.0137184
A0A060X2P7	A0A060W1F1	-0.707143	0.00319548
A0A060X2P7	A0A060W917	0.614286	0.014834
A0A060X2P7	A0A060WN38	0.657143	0.00777025
A0A060X2P7	A0A060XPI6	0.613048	0.0150937
A0A060X2P7	A0A060YD33	0.741629	0.0015519
A0A060X2P7	A0A060Z062	0.645219	0.00938992
A0A060X2P7	A0A061A7Q3	0.655882	0.00793026
A0A060X2P7	A5JUT5	0.677424	0.00552619
A0A060X2P7	C4B4C5	0.692857	0.00419023
A0A060X2P7	P11941	-0.614835	0.0147198
A0A060X2P7	Q2L4Q6	0.6	0.0180501
A0A060X2P7	Q92093	0.658291	0.00762675
A0A060X2P7	Q9I9M6	0.786805	0.000501028
A0A060X309	A0A060W1F1	-0.714286	0.00277438
A0A060X309	A0A060WCH3	0.628571	0.0120795
A0A060X309	A0A060WXK2	0.614286	0.014834
A0A060X309	A0A060XKA1	0.707143	0.00319548
A0A060X309	A0A060XPI6	0.63807	0.0104806
A0A060X309	P79825	0.635714	0.0108607
A0A060X339	A0A060VZH2	0.720195	0.00246064
A0A060X339	A0A060X309	-0.614145	0.0148634
A0A060X339	A0A060XKA1	-0.745088	0.00143482
A0A060X339	A0A060XYF3	-0.708203	0.00312997
A0A060X339	C1BH52	-0.609156	0.0159332
A0A060X339	P79825	-0.800417	0.000338027
A0A060X7U1	A0A060XEG1	0.672838	0.00598185
A0A060X7U1	A0A060XSW8	0.603736	0.0171617
A0A060X7U1	C1BEM6	-0.632832	0.0113405
A0A060X7U1	C1BEX3	-0.61101	0.0155289
A0A060X7U1	Q7T2K6	-0.657342	0.00774518
A0A060X7U1	Q98973	-0.618284	0.0140186
A0A060X8D9	A0A060Y462	0.6366	0.0107165
A0A060X8X3	A0A060XBB9	0.674033	0.00586035
A0A060X8X3	A0A060Y572	0.750792	0.00125739
A0A060X8X3	A0A060YNF5	0.741197	0.00156706
A0A060X8X3	A0A060Z9H8	0.707615	0.00316615
A0A060X8X3	C1BGU6	0.842853	7.9685e-05
A0A060X8X3	Q08G23	0.832511	0.000117451
A0A060X960	A0A060VWW1	-0.757143	0.00108111
A0A060X960	A0A060W2S2	-0.671429	0.00612777
A0A060X960	A0A060W748	0.685714	0.00477225
A0A060X960	A0A060W754	-0.750671	0.00126096
A0A060X960	A0A060W917	-0.796429	0.000380468
A0A060X960	A0A060WCH3	-0.8	0.00034227
A0A060X960	A0A060WGR2	0.671884	0.0060803
A0A060X960	A0A060WGU6	0.603571	0.0172001
A0A060X960	A0A060WHT8	0.777619	0.000643494
A0A060X960	A0A060WKG4	0.659127	0.00752349
A0A060X960	A0A060WRB4	0.642117	0.00985165
A0A060X960	A0A060X0D1	-0.657143	0.00777025
A0A060X960	A0A060XA94	-0.675	0.0057635
A0A060X960	A0A060XBB9	0.616603	0.0143571
A0A060X960	A0A060XE72	-0.617857	0.0141039
A0A060X960	A0A060XKA1	-0.717857	0.00258117
A0A060X960	A0A060XKK4	0.795353	0.000392626
A0A060X960	A0A060XPI6	-0.636283	0.010768
A0A060X960	A0A060XRC5	-0.689286	0.00447373
A0A060X960	A0A060XTF5	0.639286	0.0102884
A0A060X960	A0A060XVF4	0.642857	0.00973994
A0A060X960	A0A060Y2D3	-0.727603	0.00210811
A0A060X960	A0A060Y572	0.608098	0.0161675
A0A060X960	A0A060Y5T9	-0.835714	0.000104447
A0A060X960	A0A060YD01	-0.617857	0.0141039
A0A060X960	A0A060YNF5	0.625108	0.0127076
A0A060X960	A0A060YST0	0.765532	0.000879455
A0A060X960	A0A060YU50	-0.728571	0.00206521
A0A060X960	A0A060YWY3	0.60818	0.0161492
A0A060X960	A0A060YZR6	0.824378	0.000156561
A0A060X960	A0A060Z9H8	0.637865	0.0105132
A0A060X960	A5H0J9	-0.614286	0.014834
A0A060X960	C1BF66	0.628542	0.0120848
A0A060X960	C1BG12	0.842542	8.06504e-05
A0A060X960	C4B4C5	-0.685714	0.00477225
A0A060X960	D5H440	-0.828571	0.000135245
A0A060X960	O57523	-0.664286	0.00691068
A0A060X960	P79825	-0.678571	0.00541655
A0A060X960	P79899	-0.628691	0.0120583
A0A060X960	Q3LA41	-0.631486	0.01157
A0A060X960	Q70Z26	0.782143	0.00056971
A0A060X960	Q9PT14	0.8	0.00034227
A0A060X9D3	A0A060VUA9	0.652535	0.00836781
A0A060X9D3	A0A060VWW1	-0.602324	0.0174935
A0A060X9D3	A0A060VZH2	0.874691	1.98234e-05
A0A060X9D3	A0A060W748	0.645219	0.00938992
A0A060X9D3	A0A060W754	-0.708408	0.00311741
A0A060X9D3	A0A060WC08	0.701693	0.00354986
A0A060X9D3	A0A060WCH3	-0.700626	0.00362276
A0A060X9D3	A0A060WGR2	0.8023	0.000319372
A0A060X9D3	A0A060WGU6	0.707775	0.00315627
A0A060X9D3	A0A060WHC7	-0.749828	0.00128604
A0A060X9D3	A0A060WHF0	0.768544	0.000814983
A0A060X9D3	A0A060WHT8	0.810576	0.00024709
A0A060X9D3	A0A060WJB1	-0.63807	0.0104806
A0A060X9D3	A0A060WKG4	0.806556	0.000280306
A0A060X9D3	A0A060WRB4	0.776763	0.000658299
A0A060X9D3	A0A060WUI1	0.652535	0.00836781
A0A060X9D3	A0A060WUN3	-0.700626	0.00362276
A0A060X9D3	A0A060WW01	-0.777186	0.000650944
A0A060X9D3	A0A060XBB9	0.8023	0.000319372
A0A060X9D3	A0A060XEG1	0.686327	0.00471991
A0A060X9D3	A0A060XGG8	0.773703	0.000713474
A0A060X9D3	A0A060XKK4	0.847048	6.75482e-05
A0A060X9D3	A0A060XRC5	-0.65773	0.00769653
A0A060X9D3	A0A060XTF5	0.773906	0.000709709
A0A060X9D3	A0A060Y0R7	0.789991	0.000458086
A0A060X9D3	A0A060Y572	0.776763	0.000658299
A0A060X9D3	A0A060Y5T9	-0.650581	0.00863182
A0A060X9D3	A0A060YD01	-0.65773	0.00769653
A0A060X9D3	A0A060YH37	-0.80429	0.00030059
A0A060X9D3	A0A060YNF5	0.772507	0.000736046
A0A060X9D3	A0A060YST0	0.798478	0.000358146
A0A060X9D3	A0A060YU50	-0.775693	0.000677183
A0A060X9D3	A0A060YWQ3	0.722296	0.00235618
A0A060X9D3	A0A060YY24	0.77748	0.000645877
A0A060X9D3	A0A060YZ84	-0.750671	0.00126096
A0A060X9D3	A0A060YZR6	0.742604	0.00151817
A0A060X9D3	A0A060Z4W3	-0.631485	0.0115702
A0A060X9D3	A0A060Z9H8	0.793788	0.000410894
A0A060X9D3	A0A061A7A8	-0.640429	0.0101103
A0A060X9D3	A0A061AD33	0.738159	0.00167697
A0A060X9D3	A5H0J9	-0.80429	0.00030059
A0A060X9D3	B5AXN8	0.802503	0.000317419
A0A060X9D3	C1BF66	0.651284	0.00853613
A0A060X9D3	C1BG12	0.787076	0.000497251
A0A060X9D3	C1BGU6	0.61015	0.0157155
A0A060X9D3	C1BH52	-0.745975	0.00140598
A0A060X9D3	D5H440	-0.766756	0.000852762
A0A060X9D3	O57523	-0.66488	0.00684273
A0A060X9D3	P11941	0.663685	0.00697993
A0A060X9D3	P79899	-0.712149	0.00289542
A0A060X9D3	Q08G23	0.619325	0.0138121
A0A060X9D3	Q9DFD5	0.738371	0.00166913
A0A060X9D3	Q9DG75	-0.674419	0.0058216
A0A060X9D3	Q9PT14	0.634495	0.0110616
A0A060X9D3	Q9YGE8	0.677391	0.00552936
A0A060X9D3	S0F2P2	0.680452	0.00524059
A0A060XA94	A0A060W3H4	0.608098	0.0161675
A0A060XA94	A0A060XKA1	0.757143	0.00108111
A0A060XA94	P79825	0.710714	0.00297899
A0A060XA94	P79899	0.63622	0.0107782
A0A060XA94	Q7ZZW1	0.621429	0.013402
A0A060XAE5	A0A060VVE5	0.614188	0.0148543
A0A060XAE5	A0A060W3H4	-0.608098	0.0161675
A0A060XAE5	A0A060Y4C1	-0.610224	0.0156993
A0A060XAE5	A0A060YP37	-0.7	0.00366607
A0A060XAE5	A0A060Z9P5	-0.600438	0.0179443
A0A060XAE5	C0KIP4	0.742857	0.00150949
A0A060XAE5	C1BEH9	-0.793736	0.000411514
A0A060XAE5	C1BEX3	-0.692857	0.00419023
A0A060XAE5	C1BGU6	0.614188	0.0148543
A0A060XAE5	P69069	-0.809852	0.000252822
A0A060XAE5	Q98973	-0.664286	0.00691068
A0A060XBB9	A0A060Y572	0.979747	1.83855e-10
A0A060XBB9	A0A060YNF5	0.964557	6.73479e-09
A0A060XBB9	A0A060YST0	0.858733	4.15065e-05
A0A060XBB9	A0A060Z9H8	0.98481	2.86846e-11
A0A060XBB9	C1BGU6	0.758589	0.0010439
A0A060XBB9	Q08G23	0.747674	0.00135202
A0A060XCX2	Q70W32	-0.737951	0.00168473
A0A060XE72	A0A060WC08	-0.620484	0.013585
A0A060XE72	A0A060WCH3	0.603571	0.0172001
A0A060XE72	A0A060WGR2	-0.616603	0.0143571
A0A060XE72	A0A060WHT8	-0.709124	0.00307388
A0A060XE72	A0A060WKG4	-0.637865	0.0105132
A0A060XE72	A0A060WN18	0.666671	0.00664097
A0A060XE72	A0A060X0D1	0.65	0.00871158
A0A060XE72	A0A060XKK4	-0.602324	0.0174935
A0A060XE72	A0A060XRC5	0.871429	2.32365e-05
A0A060XE72	A0A060Y2D3	0.620076	0.0136646
A0A060XE72	A0A060Y4C1	0.710156	0.00301203
A0A060XE72	A0A060Y9S3	0.635714	0.0108607
A0A060XE72	A0A060YD01	0.721429	0.00239887
A0A060XE72	A0A060YH37	0.664286	0.00691068
A0A060XE72	A0A060YST0	-0.741357	0.00156143
A0A060XE72	A0A060Z9H8	-0.616603	0.0143571
A0A060XE72	A0A061A7B4	0.660714	0.00733057
A0A060XE72	C0KIP4	-0.625	0.0127275
A0A060XE72	C1BG12	-0.809615	0.000254718
A0A060XE72	O57523	0.610714	0.0155928
A0A060XE72	P79899	0.798099	0.000362194
A0A060XE72	Q3LA41	0.703778	0.00341078
A0A060XE72	Q9PT14	-0.728571	0.00206521
A0A060XE72	S0F2P2	-0.683718	0.00494582
A0A060XEG1	Q08G23	0.614188	0.0148543
A0A060XGG8	A0A060VVE5	0.692726	0.00420037
A0A060XGG8	A0A060VWW1	-0.786417	0.000506474
A0A060XGG8	A0A060W748	0.789991	0.000458086
A0A060XGG8	A0A060W754	-0.896243	6.1342e-06
A0A060XGG8	A0A060WC08	0.63112	0.011633
A0A060XGG8	A0A060WCH3	-0.913316	1.98896e-06
A0A060XGG8	A0A060WGR2	0.749097	0.00130814
A0A060XGG8	A0A060WGU6	0.798928	0.000353391
A0A060XGG8	A0A060WHF0	0.809652	0.000254426
A0A060XGG8	A0A060WHT8	0.822674	0.000165975
A0A060XGG8	A0A060WKG4	0.744841	0.00144294
A0A060XGG8	A0A060WRB4	0.804428	0.000299318
A0A060XGG8	A0A060WUN3	-0.682753	0.00503157
A0A060XGG8	A0A060WW01	-0.66434	0.00690451
A0A060XGG8	A0A060X0D1	-0.732797	0.00188606
A0A060XGG8	A0A060X8X3	0.733955	0.00183926
A0A060XGG8	A0A060X960	0.775693	0.000677183
A0A060XGG8	A0A060XBB9	0.740585	0.00158873
A0A060XGG8	A0A060XKA1	-0.654156	0.00815366
A0A060XGG8	A0A060XKK4	0.904293	3.70212e-06
A0A060XGG8	A0A060XPI6	-0.624329	0.0128521
A0A060XGG8	A0A060XRC5	-0.768544	0.000814983
A0A060XGG8	A0A060XTF5	0.818588	0.000190458
A0A060XGG8	A0A060Y2D3	-0.681617	0.00513394
A0A060XGG8	A0A060Y572	0.774635	0.000696291
A0A060XGG8	A0A060Y5T9	-0.788204	0.000481785
A0A060XGG8	A0A060Y9M1	0.756032	0.00111039
A0A060XGG8	A0A060YNF5	0.783147	0.000554303
A0A060XGG8	A0A060YST0	0.794445	0.000403139
A0A060XGG8	A0A060YU50	-0.879357	1.56721e-05
A0A060XGG8	A0A060YXK5	0.86574	3.03516e-05
A0A060XGG8	A0A060YY24	0.654156	0.00815366
A0A060XGG8	A0A060YZR6	0.904039	3.76414e-06
A0A060XGG8	A0A060Z4W3	-0.813953	0.00022174
A0A060XGG8	A0A060Z9H8	0.753353	0.00118369
A0A060XGG8	A5H0J9	-0.772118	0.000743494
A0A060XGG8	C0KIP4	0.600536	0.0179204
A0A060XGG8	C1BF66	0.709758	0.00303576
A0A060XGG8	C1BG12	0.804523	0.000298446
A0A060XGG8	C1BGU6	0.775303	0.000684177
A0A060XGG8	C1BH52	-0.919499	1.24836e-06
A0A060XGG8	D5H440	-0.87042	2.43849e-05
A0A060XGG8	P79825	-0.82395	0.000158882
A0A060XGG8	P79899	-0.747944	0.0013436
A0A060XGG8	Q08G23	0.766128	0.000866384
A0A060XGG8	Q3LA41	-0.618218	0.0140317
A0A060XGG8	Q70Z26	0.652368	0.00839007
A0A060XGG8	Q9PT14	0.832887	0.00011586
A0A060XGG8	Q9YGE8	0.734585	0.00181416
A0A060XGG8	S0F2P2	0.712439	0.00287871
A0A060XHI9	A0A060XE72	0.65	0.00871158
A0A060XHI9	A0A060XRC5	0.6	0.0180501
A0A060XHI9	A0A060YM30	-0.680965	0.00519338
A0A060XHI9	C1BG12	-0.617864	0.0141025
A0A060XHI9	Q5F4T3	0.607143	0.0163813
A0A060XIK2	A0A060W1F1	-0.643432	0.00965385
A0A060XIK2	A0A060Y2D3	0.713904	0.0027957
A0A060XIK2	A0A060Z062	0.807692	0.00027057
A0A060XIK2	P98093	-0.600536	0.0179204
A0A060XKA1	A0A060Y5T9	0.75	0.0012809
A0A060XKA1	C4B4C5	0.717857	0.00258117
A0A060XKA1	D5H440	0.617857	0.0141039
A0A060XKA1	P79825	0.85	5.99589e-05
A0A060XKA1	P79899	0.606103	0.0166165
A0A060XKA1	Q3LA41	0.699525	0.0036992
A0A060XKK4	A0A060VWW1	-0.756032	0.00111039
A0A060XKK4	A0A060W754	-0.851521	5.63331e-05
A0A060XKK4	A0A060WC08	0.673464	0.00591803
A0A060XKK4	A0A060WCH3	-0.781055	0.000586793
A0A060XKK4	A0A060WGR2	0.785275	0.000522774
A0A060XKK4	A0A060WGU6	0.73101	0.00196024
A0A060XKK4	A0A060WHF0	0.770331	0.000778573
A0A060XKK4	A0A060WHT8	0.8751	1.94266e-05
A0A060XKK4	A0A060WKG4	0.772507	0.000736046
A0A060XKK4	A0A060WRB4	0.785275	0.000522774
A0A060XKK4	A0A060WUN3	-0.722074	0.00236707
A0A060XKK4	A0A060X0D1	-0.655943	0.00792251
A0A060XKK4	A0A060X8X3	0.612973	0.0151095
A0A060XKK4	A0A060XBB9	0.785275	0.000522774
A0A060XKK4	A0A060XRC5	-0.764969	0.000891948
A0A060XKK4	A0A060Y2D3	-0.670854	0.00618798
A0A060XKK4	A0A060Y572	0.759738	0.0010151
A0A060XKK4	A0A060Y5T9	-0.764969	0.000891948
A0A060XKK4	A0A060Y9M1	0.720286	0.00245602
A0A060XKK4	A0A060YH37	-0.675603	0.00570367
A0A060XKK4	A0A060YNF5	0.755482	0.00112515
A0A060XKK4	A0A060YST0	0.854936	4.88453e-05
A0A060XKK4	A0A060YY24	0.745309	0.00142761
A0A060XKK4	A0A060Z9H8	0.763994	0.000913931
A0A060XKK4	A5H0J9	-0.702413	0.0035013
A0A060XKK4	C1BF66	0.713791	0.00280204
A0A060XKK4	C1BG12	0.891761	7.98557e-06
A0A060XKK4	C1BGU6	0.669788	0.00630105
A0A060XKK4	D5H440	-0.848973	6.2516e-05
A0A060XKK4	O57523	-0.609473	0.0158635
A0A060XKK4	P79825	-0.614835	0.0147198
A0A060XKK4	P79899	-0.73664	0.0017342
A0A060XKK4	Q08G23	0.651438	0.00851527
A0A060XKK4	Q3LA41	-0.602257	0.0175093
A0A060XKK4	Q9PT14	0.782842	0.000558945
A0A060XKK4	Q9YGE8	0.698839	0.00374754
A0A060XKK4	S0F2P2	0.717286	0.00261132
A0A060XLW3	A0A060VUA9	0.659029	0.00753549
A0A060XLW3	A0A060VWC6	-0.661281	0.00726266
A0A060XLW3	A0A060WC08	0.662541	0.00711333
A0A060XLW3	A0A060WE68	0.657173	0.0077665
A0A060XLW3	A0A060WGR2	0.717193	0.00261625
A0A060XLW3	A0A060WHT8	0.675283	0.00573543
A0A060XLW3	A0A060WI78	-0.637059	0.0106424
A0A060XLW3	A0A060WKG4	0.753053	0.00119215
A0A060XLW3	A0A060WRB4	0.793395	0.000415584
A0A060XLW3	A0A060WUI1	0.659029	0.00753549
A0A060XLW3	A0A060X8X3	0.615824	0.0145161
A0A060XLW3	A0A060X960	0.628691	0.0120583
A0A060XLW3	A0A060XBB9	0.699263	0.00371758
A0A060XLW3	A0A060XNR6	-0.63622	0.0107782
A0A060XLW3	A0A060XUK2	0.687657	0.004608
A0A060XLW3	A0A060Y572	0.744088	0.00146792
A0A060XLW3	A0A060YCI1	-0.703983	0.0033973
A0A060XLW3	A0A060YNF5	0.757535	0.00107091
A0A060XLW3	A0A060YST0	0.645553	0.00934124
A0A060XLW3	A0A060YWQ3	0.603991	0.0171023
A0A060XLW3	A0A060YWY3	0.851368	5.66886e-05
A0A060XLW3	A0A060YZ84	-0.756688	0.00109303
A0A060XLW3	A0A060Z9H8	0.739605	0.00162389
A0A060XLW3	A0A061A7A8	-0.79316	0.000418408
A0A060XLW3	C1BF66	0.883388	1.26929e-05
A0A060XLW3	C1BGU6	0.715051	0.00273204
A0A060XLW3	C1BHQ1	0.8591	4.08485e-05
A0A060XLW3	D5H440	-0.606103	0.0166165
A0A060XLW3	M9PNX6	0.639036	0.0103276
A0A060XLW3	Q08G23	0.753702	0.00117393
A0A060XLW3	Q70Z26	0.899743	4.95069e-06
A0A060XLW3	Q90ZF1	0.627925	0.0121949
A0A060XLW3	Q9PT13	-0.722222	0.00235979
A0A060XLW3	S0F2P2	0.604328	0.017024
A0A060XMW3	A0A060WC08	0.608396	0.0161012
A0A060XMW3	A0A060WCI5	-0.607143	0.0163813
A0A060XMW3	A0A060WN18	-0.645165	0.00939777
A0A060XMW3	A0A060WXK2	-0.635714	0.0108607
A0A060XMW3	A0A060XPE1	-0.603571	0.0172001
A0A060XMW3	A0A060XWZ8	-0.789286	0.000467327
A0A060XMW3	A0A060YSA7	0.739286	0.00163551
A0A060XMW3	A0A060YZ84	-0.6	0.0180501
A0A060XMW3	A5H0J9	-0.603571	0.0172001
A0A060XMW3	D0FZZ1	0.706335	0.00324615
A0A060XMW3	E7BAR3	-0.628571	0.0120795
A0A060XMW3	Q9DDV9	-0.632143	0.0114575
A0A060XN19	O57523	0.796429	0.000380468
A0A060XNR6	P79825	0.742857	0.00150949
A0A060XNS8	A0A060WN38	0.653571	0.00823037
A0A060XNS8	A0A060WX26	-0.774806	0.000693164
A0A060XNS8	A0A060YCI1	0.646429	0.00921455
A0A060XNS8	A0A060YJC7	-0.6	0.0180501
A0A060XNS8	A0A060YSX4	0.764969	0.000891948
A0A060XNS8	A0A060YTC6	0.65	0.00871158
A0A060XNS8	P06350	-0.652717	0.00834361
A0A060XNS8	Q98973	-0.603571	0.0172001
A0A060XNS8	Q9DDV9	0.671429	0.00612777
A0A060XNS8	Q9DFF8	0.714286	0.00277438
A0A060XPE1	P98093	0.885714	1.11998e-05
A0A060XPI6	A0A060VWW1	0.668454	0.00644479
A0A060XPI6	A0A060W917	0.666667	0.00664141
A0A060XPI6	A0A060WCH3	0.723861	0.00228073
A0A060XPI6	A0A060WGU6	-0.652368	0.00839007
A0A060XPI6	A0A060WN18	0.62063	0.0135565
A0A060XPI6	A0A060X0D1	0.899017	5.17905e-06
A0A060XPI6	A0A060XA94	0.813226	0.000227008
A0A060XPI6	A0A060XKA1	0.807864	0.000269119
A0A060XPI6	A0A060XRC5	0.693477	0.00414255
A0A060XPI6	A0A060Y2D3	0.753366	0.00118334
A0A060XPI6	A0A060Y4C1	0.695894	0.00396054
A0A060XPI6	A0A060Y5T9	0.61841	0.0139935
A0A060XPI6	A0A060Z062	0.641324	0.00997257
A0A060XPI6	C4B4C5	0.802503	0.000317419
A0A060XPI6	P79825	0.784629	0.000532183
A0A060XPI6	P79899	0.674469	0.00581657
A0A060XPI6	Q3LA41	0.663973	0.00694672
A0A060XPI6	Q7ZZW1	0.811439	0.000240397
A0A060XRC5	A0A060VVE5	-0.600438	0.0179443
A0A060XRC5	A0A060W3H4	0.644244	0.00953329
A0A060XRC5	A0A060WGR2	-0.699525	0.0036992
A0A060XRC5	A0A060WHF0	-0.617857	0.0141039
A0A060XRC5	A0A060WHT8	-0.821939	0.000170176
A0A060XRC5	A0A060WKG4	-0.674011	0.00586266
A0A060XRC5	A0A060WN18	0.666671	0.00664097
A0A060XRC5	A0A060WRB4	-0.695273	0.00400671
A0A060XRC5	A0A060WUN3	0.785714	0.000516455
A0A060XRC5	A0A060XA94	0.607143	0.0163813
A0A060XRC5	A0A060XAE5	-0.732143	0.00191296
A0A060XRC5	A0A060XBB9	-0.644244	0.00953329
A0A060XRC5	A0A060XKA1	0.607143	0.0163813
A0A060XRC5	A0A060Y4C1	0.761185	0.000979726
A0A060XRC5	A0A060Y572	-0.661253	0.00726595
A0A060XRC5	A0A060Y5T9	0.614286	0.014834
A0A060XRC5	A0A060YNF5	-0.682515	0.00505282
A0A060XRC5	A0A060YST0	-0.797765	0.000365789
A0A060XRC5	A0A060Z9H8	-0.669758	0.00630426
A0A060XRC5	A5H0J9	0.660714	0.00733057
A0A060XRC5	C0KIP4	-0.735714	0.00176987
A0A060XRC5	C1BF66	-0.648687	0.00889386
A0A060XRC5	C1BG12	-0.871596	2.30506e-05
A0A060XRC5	D5H440	0.7	0.00366607
A0A060XRC5	P79899	0.847039	6.75743e-05
A0A060XRC5	Q3LA41	0.618729	0.01393
A0A060XRC5	S0F2P2	-0.681781	0.005119
A0A060XSJ5	A0A060XAE5	-0.617857	0.0141039
A0A060XSJ5	A0A060YJC7	0.957143	2.27368e-08
A0A060XSJ5	A0A060YP37	0.946429	9.44794e-08
A0A060XSJ5	C1BEM6	0.910714	2.39502e-06
A0A060XSJ5	C1BEX3	0.878571	1.63153e-05
A0A060XSJ5	P14527	0.825738	0.000149368
A0A060XSJ5	Q98973	0.932143	4.24122e-07
A0A060XSJ5	Q98974	0.825	0.000153236
A0A060XSW8	P98093	0.671429	0.00612777
A0A060XTF5	A0A060VWW1	-0.628571	0.0120795
A0A060XTF5	A0A060W748	0.878571	1.63153e-05
A0A060XTF5	A0A060W754	-0.85076	5.81235e-05
A0A060XTF5	A0A060WC08	0.632571	0.0113847
A0A060XTF5	A0A060WCH3	-0.817857	0.000195137
A0A060XTF5	A0A060WGR2	0.784574	0.000533
A0A060XTF5	A0A060WGU6	0.85	5.99589e-05
A0A060XTF5	A0A060WHF0	0.853571	5.17314e-05
A0A060XTF5	A0A060WHT8	0.854172	5.04436e-05
A0A060XTF5	A0A060WKG4	0.759059	0.00103204
A0A060XTF5	A0A060WRB4	0.788826	0.000473425
A0A060XTF5	A0A060WUN3	-0.682143	0.00508633
A0A060XTF5	A0A060WZY4	-0.642857	0.00973994
A0A060XTF5	A0A060X8X3	0.656746	0.00782039
A0A060XTF5	A0A060XBB9	0.788826	0.000473425
A0A060XTF5	A0A060XKK4	0.779268	0.000615759
A0A060XTF5	A0A060Y572	0.771817	0.000749325
A0A060XTF5	A0A060Y5T9	-0.617857	0.0141039
A0A060XTF5	A0A060Y7H2	0.696429	0.00392119
A0A060XTF5	A0A060YH37	-0.617857	0.0141039
A0A060XTF5	A0A060YNF5	0.767564	0.000835516
A0A060XTF5	A0A060YST0	0.821939	0.000170176
A0A060XTF5	A0A060YU50	-0.664286	0.00691068
A0A060XTF5	A0A060YY24	0.864286	3.24337e-05
A0A060XTF5	A0A060YZ84	-0.621429	0.013402
A0A060XTF5	A0A060YZR6	0.784951	0.000527477
A0A060XTF5	A0A060Z9H8	0.763312	0.000929578
A0A060XTF5	A5H0J9	-0.792857	0.000422077
A0A060XTF5	C1BF66	0.68495	0.00483817
A0A060XTF5	C1BG12	0.751509	0.00123639
A0A060XTF5	C1BGU6	0.715025	0.00273348
A0A060XTF5	D5H440	-0.846429	6.92382e-05
A0A060XTF5	P79825	-0.6	0.0180501
A0A060XTF5	Q08G23	0.678357	0.00543691
A0A060XTF5	Q9PT14	0.739286	0.00163551
A0A060XTF5	Q9YGE8	0.625	0.0127275
A0A060XTF5	S0F2P2	0.685655	0.00477731
A0A060XUK2	A0A060VUA9	0.767905	0.000828313
A0A060XUK2	A0A060W2U3	0.717491	0.00260044
A0A060XUK2	A0A060WC08	0.657333	0.00774635
A0A060XUK2	A0A060WGR2	0.653332	0.00826197
A0A060XUK2	A0A060WHT8	0.69766	0.00383168
A0A060XUK2	A0A060WKG4	0.670357	0.00624054
A0A060XUK2	A0A060WRB4	0.695894	0.00396054
A0A060XUK2	A0A060WUI1	0.767905	0.000828313
A0A060XUK2	A0A060WUN3	-0.645219	0.00938992
A0A060XUK2	A0A060X0D1	-0.641645	0.00992355
A0A060XUK2	A0A060XBB9	0.632051	0.0114733
A0A060XUK2	A0A060XE72	-0.613048	0.0150937
A0A060XUK2	A0A060XKK4	0.637746	0.0105322
A0A060XUK2	A0A060XMW3	0.688115	0.00456993
A0A060XUK2	A0A060XRC5	-0.630921	0.0116675
A0A060XUK2	A0A060XWZ8	-0.632708	0.0113614
A0A060XUK2	A0A060Y572	0.640563	0.0100895
A0A060XUK2	A0A060Y5Z9	-0.654741	0.00807745
A0A060XUK2	A0A060Y9S3	-0.763182	0.000932582
A0A060XUK2	A0A060YNF5	0.649076	0.00883963
A0A060XUK2	A0A060YPN6	0.689902	0.00442376
A0A060XUK2	A0A060YSA7	0.709562	0.0030475
A0A060XUK2	A0A060YST0	0.677496	0.00551919
A0A060XUK2	A0A060YU50	-0.648794	0.00887898
A0A060XUK2	A0A060YWQ3	0.626711	0.0124137
A0A060XUK2	A0A060YWY3	0.90727	3.03714e-06
A0A060XUK2	A0A060YZ84	-0.722074	0.00236707
A0A060XUK2	A0A060Z9H8	0.649076	0.00883963
A0A060XUK2	A0A060ZGE4	-0.616792	0.0143186
A0A060XUK2	A0A061A7B4	-0.604111	0.0170744
A0A060XUK2	C1BF66	0.806543	0.000280419
A0A060XUK2	C1BG12	0.707593	0.00316753
A0A060XUK2	C1BHQ1	0.610018	0.0157442
A0A060XUK2	E7BAR3	-0.63807	0.0104806
A0A060XUK2	P79899	-0.706497	0.00323596
A0A060XUK2	Q08G23	0.61015	0.0157155
A0A060XUK2	Q70Z26	0.677391	0.00552936
A0A060XUK2	Q90ZF1	0.790057	0.00045724
A0A060XUK2	S0F2P2	0.647496	0.00906191
A0A060XUR3	A0A060W7E7	0.641645	0.00992355
A0A060XUR3	A0A060XNR6	0.766756	0.000852762
A0A060XUR3	P79825	0.614835	0.0147198
A0A060XVF4	A0A060Z9P5	-0.623355	0.0130348
A0A060XVF4	C1BG12	0.643044	0.00971191
A0A060XWS9	A0A060WGU6	-0.680112	0.00527205
A0A060XWS9	A0A060WHF0	-0.61101	0.0155289
A0A060XWS9	A0A060WHT8	-0.652385	0.00838787
A0A060XWS9	A0A060WN18	0.726355	0.00216449
A0A060XWS9	A0A060WUN3	0.672838	0.00598185
A0A060XWS9	A0A060WW01	0.603704	0.0171693
A0A060XWS9	A0A060WXT1	0.617225	0.014231
A0A060XWS9	A0A060X0D1	0.61101	0.0155289
A0A060XWS9	A0A060X9D3	-0.695281	0.00400607
A0A060XWS9	A0A060XE72	0.64738	0.00907843
A0A060XWS9	A0A060XEG1	-0.658291	0.00762675
A0A060XWS9	A0A060XGG8	-0.618837	0.0139086
A0A060XWS9	A0A060XKK4	-0.660699	0.00733237
A0A060XWS9	A0A060XRC5	0.691023	0.00433396
A0A060XWS9	A0A060Y0R7	-0.738304	0.0016716
A0A060XWS9	A0A060YH37	0.727393	0.00211753
A0A060XWS9	A0A060YPN6	-0.621921	0.0133074
A0A060XWS9	A0A060YU50	0.709208	0.00306882
A0A060XWS9	A0A060Z4W3	0.67344	0.00592044
A0A060XWS9	A0A060Z9B8	-0.653354	0.00825902
A0A060XWS9	A5H0J9	0.618284	0.0140186
A0A060XWS9	C1BG12	-0.621313	0.0134244
A0A060XWS9	C1BH52	0.626117	0.0125219
A0A060XWS9	E7BAR3	0.691023	0.00433396
A0A060XWS9	P0DMV4	-0.62963	0.0118926
A0A060XWS9	P11941	-0.713482	0.00281939
A0A060XWS9	P79899	0.743737	0.00147967
A0A060XWS9	S0F2P2	-0.601588	0.0176682
A0A060XWZ8	A0A060WFS6	0.675	0.0057635
A0A060XWZ8	A0A060WN18	0.713266	0.00283161
A0A060XWZ8	A0A060WXK2	0.625	0.0127275
A0A060XWZ8	A0A060X0D1	0.685714	0.00477225
A0A060XWZ8	A0A060Y9S3	0.614286	0.014834
A0A060XWZ8	E7BAR3	0.617857	0.0141039
A0A060XWZ8	P79899	0.666337	0.00667821
A0A060XWZ8	Q7ZZW1	0.85	5.99589e-05
A0A060XWZ8	Q9DDV9	0.721429	0.00239887
A0A060XXG0	C1BGU6	0.646272	0.00923705
A0A060XXG0	Q08G23	0.637105	0.0106349
A0A060XYF3	A0A060X309	0.632143	0.0114575
A0A060XYF3	A0A060XKA1	0.789286	0.000467327
A0A060XZ25	A0A060XAE5	-0.739286	0.00163551
A0A060XZ25	A0A060XSJ5	0.939286	2.09458e-07
A0A060XZ25	A0A060YJC7	0.960714	1.30275e-08
A0A060XZ25	A0A060YP37	0.982143	8.15734e-11
A0A060XZ25	A0A060ZVC3	-0.603571	0.0172001
A0A060XZ25	C1BEH9	0.652717	0.00834361
A0A060XZ25	C1BEM6	0.960714	1.30275e-08
A0A060XZ25	C1BEX3	0.932143	4.24122e-07
A0A060XZ25	P14527	0.868633	2.65363e-05
A0A060XZ25	P62797	0.600099	0.0180261
A0A060XZ25	P69069	0.660775	0.00732329
A0A060XZ25	Q98973	0.935714	3.01065e-07
A0A060XZ25	Q98974	0.871429	2.32365e-05
A0A060XZ25	Q9DDV9	-0.607143	0.0163813
A0A060Y0R7	A0A060VVE5	0.641689	0.00991678
A0A060Y0R7	A0A060VZH2	0.657684	0.00770229
A0A060Y0R7	A0A060W748	0.725	0.00222703
A0A060Y0R7	A0A060W754	-0.743521	0.00148694
A0A060Y0R7	A0A060WCH3	-0.717857	0.00258117
A0A060Y0R7	A0A060WGR2	0.667632	0.00653467
A0A060Y0R7	A0A060WGU6	0.835714	0.000104447
A0A060Y0R7	A0A060WHF0	0.914286	1.85311e-06
A0A060Y0R7	A0A060WHT8	0.789707	0.000461799
A0A060Y0R7	A0A060WKG4	0.663379	0.00701539
A0A060Y0R7	A0A060WRB4	0.748428	0.00132863
A0A060Y0R7	A0A060WUN3	-0.746429	0.00139141
A0A060Y0R7	A0A060WW01	-0.716482	0.00265424
A0A060Y0R7	A0A060X0D1	-0.6	0.0180501
A0A060Y0R7	A0A060X8X3	0.600338	0.0179683
A0A060Y0R7	A0A060XAE5	0.817857	0.000195137
A0A060Y0R7	A0A060XBB9	0.659127	0.00752349
A0A060Y0R7	A0A060XEG1	0.814286	0.000219366
A0A060Y0R7	A0A060XGG8	0.836461	0.000101591
A0A060Y0R7	A0A060XKK4	0.806077	0.000284499
A0A060Y0R7	A0A060XRC5	-0.742857	0.00150949
A0A060Y0R7	A0A060XTF5	0.810714	0.000246008
A0A060Y0R7	A0A060XZ25	-0.65	0.00871158
A0A060Y0R7	A0A060Y572	0.693147	0.0041679
A0A060Y0R7	A0A060Y7H2	0.610714	0.0155928
A0A060Y0R7	A0A060Y9M1	0.728571	0.00206521
A0A060Y0R7	A0A060YH37	-0.667857	0.00650996
A0A060Y0R7	A0A060YNF5	0.701651	0.00355266
A0A060Y0R7	A0A060YST0	0.761503	0.000972107
A0A060Y0R7	A0A060YU50	-0.7	0.00366607
A0A060Y0R7	A0A060YXK5	0.658407	0.0076123
A0A060Y0R7	A0A060YY24	0.810714	0.000246008
A0A060Y0R7	A0A060YZR6	0.752693	0.00120235
A0A060Y0R7	A0A060Z9H8	0.667632	0.00653467
A0A060Y0R7	A0A061AD33	0.660714	0.00733057
A0A060Y0R7	A5H0J9	-0.675	0.0057635
A0A060Y0R7	C1BEH9	-0.72927	0.0020347
A0A060Y0R7	C1BEM6	-0.614286	0.014834
A0A060Y0R7	C1BF66	0.648687	0.00889386
A0A060Y0R7	C1BG12	0.728267	0.00207864
A0A060Y0R7	C1BGU6	0.751693	0.00123105
A0A060Y0R7	C1BH52	-0.747096	0.0013702
A0A060Y0R7	D5H440	-0.696429	0.00392119
A0A060Y0R7	P62797	-0.603736	0.0171617
A0A060Y0R7	P69069	-0.765532	0.000879455
A0A060Y0R7	P79899	-0.666337	0.00667821
A0A060Y0R7	Q08G23	0.733359	0.00186324
A0A060Y0R7	Q9PT14	0.721429	0.00239887
A0A060Y0R7	Q9YGE8	0.635714	0.0108607
A0A060Y0R7	S0F2P2	0.637233	0.0106144
A0A060Y1K2	A0A060XN19	-0.637997	0.0104922
A0A060Y1K2	O57523	-0.637997	0.0104922
A0A060Y2D3	A0A060VVE5	-0.639393	0.0102716
A0A060Y2D3	A0A060W1F1	-0.655918	0.00792569
A0A060Y2D3	A0A060W754	0.789241	0.000467924
A0A060Y2D3	A0A060WGR2	-0.625218	0.0126871
A0A060Y2D3	A0A060WHT8	-0.638886	0.0103513
A0A060Y2D3	A0A060XRC5	0.74194	0.00154107
A0A060Y2D3	A0A060Y5T9	0.752693	0.00120235
A0A060Y2D3	A0A060YST0	-0.618668	0.0139421
A0A060Y2D3	C1BG12	-0.728938	0.00204916
A0A060Y2D3	C4B4C5	0.691761	0.0042757
A0A060Y2D3	D5H440	0.691761	0.0042757
A0A060Y2D3	Q9PT14	-0.752693	0.00120235
A0A060Y2D3	S0F2P2	-0.620083	0.0136632
A0A060Y2D6	A0A060W1F1	-0.635714	0.0108607
A0A060Y2D6	A0A060XE72	0.657143	0.00777025
A0A060Y2D6	A0A060XRC5	0.642857	0.00973994
A0A060Y2D6	A0A060Y2D3	0.720435	0.00244853
A0A060Y2D6	A0A060YZR6	-0.605739	0.0166996
A0A060Y2D6	C0KIP4	-0.9	4.87197e-06
A0A060Y2D6	Q3LA41	0.616603	0.0143571
A0A060Y2D6	Q9PT14	-0.692857	0.00419023
A0A060Y462	Q98977	-0.624513	0.0128179
A0A060Y4C1	A0A060W3H4	0.613924	0.0149095
A0A060Y4C1	A0A060Z9P5	0.829537	0.000130693
A0A060Y4C1	P79899	0.719434	0.00249934
A0A060Y4F1	A0A060VM28	0.698981	0.00373745
A0A060Y4F1	A0A060W3H4	0.700507	0.00363095
A0A060Y4F1	A0A060XE72	0.686071	0.00474171
A0A060Y4F1	A0A060Y4C1	0.66098	0.00729866
A0A060Y4F1	A0A060ZGE4	0.784398	0.000535586
A0A060Y4F1	A0A061A8T0	0.666324	0.00667967
A0A060Y4F1	F1DRC4	0.724801	0.00223633
A0A060Y4F1	Q7ZZW1	0.617833	0.0141088
A0A060Y572	A0A060YNF5	0.994937	2.33147e-14
A0A060Y572	A0A060YST0	0.849138	6.2098e-05
A0A060Y572	A0A060Z9H8	0.994937	2.33147e-14
A0A060Y572	C1BGU6	0.834994	0.000107262
A0A060Y572	Q08G23	0.845909	7.06816e-05
A0A060Y5T9	A0A060WC08	-0.652717	0.00834361
A0A060Y5T9	A0A060WGR2	-0.72504	0.00222518
A0A060Y5T9	A0A060WHT8	-0.664804	0.00685136
A0A060Y5T9	A0A060WKG4	-0.716535	0.0026514
A0A060Y5T9	A0A060WRB4	-0.627234	0.0123191
A0A060Y5T9	A0A060XBB9	-0.729292	0.00203373
A0A060Y5T9	A0A060Y572	-0.712282	0.00288772
A0A060Y5T9	A0A060YNF5	-0.70803	0.00314057
A0A060Y5T9	A0A060YST0	-0.668833	0.00640371
A0A060Y5T9	A0A060Z9H8	-0.729292	0.00203373
A0A060Y5T9	A5H0J9	0.717857	0.00258117
A0A060Y5T9	C1BG12	-0.782499	0.000564204
A0A060Y5T9	C4B4C5	0.703571	0.00342434
A0A060Y5T9	D5H440	0.871429	2.32365e-05
A0A060Y5T9	O57523	0.65	0.00871158
A0A060Y5T9	P79899	0.602339	0.01749
A0A060Y5T9	Q3LA41	0.693147	0.0041679
A0A060Y5T9	S0F2P2	-0.662413	0.00712847
A0A060Y5Z9	A0A060VM28	0.68454	0.00487377
A0A060Y5Z9	A0A060VUA9	-0.671917	0.00607687
A0A060Y5Z9	A0A060WC08	-0.6533	0.00826617
A0A060Y5Z9	A0A060WCI5	0.641645	0.00992355
A0A060Y5Z9	A0A060WUI1	-0.671917	0.00607687
A0A060Y5Z9	A0A060XMW3	-0.723861	0.00228073
A0A060Y5Z9	A0A060XPE1	0.607686	0.0162595
A0A060Y5Z9	A0A060XWZ8	0.745309	0.00142761
A0A060Y5Z9	A0A060Y9S3	0.63807	0.0104806
A0A060Y5Z9	A0A060YPN6	-0.609473	0.0158635
A0A060Y5Z9	A0A060YWY3	-0.633926	0.0111565
A0A060Y5Z9	A0A060YZ84	0.648794	0.00887898
A0A060Y5Z9	A0A060ZGE4	0.723198	0.00231246
A0A060Y5Z9	C1BF66	-0.633137	0.011289
A0A060Y5Z9	C1BHQ1	-0.618962	0.0138837
A0A060Y5Z9	Q90ZF1	-0.791903	0.000433806
A0A060Y683	A0A060W1F1	0.685714	0.00477225
A0A060Y683	A0A060WFS6	-0.632143	0.0114575
A0A060Y683	A0A060X309	-0.657143	0.00777025
A0A060Y683	A0A060XIK2	-0.632708	0.0113614
A0A060Y683	A0A060XPE1	0.657143	0.00777025
A0A060Y683	A0A060XPI6	-0.65773	0.00769653
A0A060Y683	A0A060YTC6	0.732143	0.00191296
A0A060Y683	A0A060Z062	-0.756032	0.00111039
A0A060Y683	Q7ZZW1	-0.603571	0.0172001
A0A060Y7H2	A0A060W748	0.6	0.0180501
A0A060Y7H2	A0A060WUN3	-0.614286	0.014834
A0A060Y7H2	A0A060YH37	-0.617857	0.0141039
A0A060Y7H2	A0A060YY24	0.792857	0.000422077
A0A060Y7H2	A5H0J9	-0.625	0.0127275
A0A060Y7H2	D0FZZ1	0.670297	0.00624684
A0A060Y7H2	D5H440	-0.625	0.0127275
A0A060Y9M1	A0A060X8X3	0.628542	0.0120848
A0A060Y9M1	A0A060YST0	0.608396	0.0161012
A0A060Y9S3	A0A060VM28	0.614286	0.014834
A0A060Y9S3	A0A060WC08	-0.745386	0.00142507
A0A060Y9S3	A0A060WKG4	-0.650622	0.00862621
A0A060Y9S3	A0A060WRB4	-0.705904	0.00327345
A0A060Y9S3	A0A060Y572	-0.650622	0.00862621
A0A060Y9S3	A0A060YNF5	-0.663379	0.00701539
A0A060Y9S3	A0A060YWY3	-0.621738	0.0133425
A0A060Y9S3	A0A060Z9H8	-0.637865	0.0105132
A0A060Y9S3	C1BF66	-0.701066	0.00359254
A0A060Y9S3	C1BGU6	-0.678357	0.00543691
A0A060Y9S3	P79899	0.643749	0.00960655
A0A060Y9S3	Q08G23	-0.715025	0.00273348
A0A060Y9S3	S0F2P2	-0.724393	0.00225553
A0A060YBS8	A0A060XNR6	-0.659502	0.00747751
A0A060YBS8	A0A060XUR3	-0.629599	0.011898
A0A060YC43	A0A060VZH2	-0.600024	0.0180442
A0A060YC43	A0A060WC08	-0.850143	5.96093e-05
A0A060YC43	A0A060WGR2	-0.793079	0.000419393
A0A060YC43	A0A060WHF0	-0.603571	0.0172001
A0A060YC43	A0A060WHT8	-0.660775	0.00732329
A0A060YC43	A0A060WKG4	-0.788826	0.000473425
A0A060YC43	A0A060WRB4	-0.818593	0.000190427
A0A060YC43	A0A060XBB9	-0.793079	0.000419393
A0A060YC43	A0A060Y572	-0.818593	0.000190427
A0A060YC43	A0A060Y9S3	0.767857	0.00082933
A0A060YC43	A0A060YD33	0.658808	0.00756277
A0A060YC43	A0A060YNF5	-0.822846	0.000165007
A0A060YC43	A0A060YSH4	0.710714	0.00297899
A0A060YC43	A0A060YST0	-0.604367	0.017015
A0A060YC43	A0A060YZ84	0.6	0.0180501
A0A060YC43	A0A060Z9H8	-0.801584	0.000326368
A0A060YC43	C1BF66	-0.749415	0.00129849
A0A060YC43	C1BG12	-0.610117	0.0157226
A0A060YC43	C1BGU6	-0.765443	0.000881412
A0A060YC43	Q08G23	-0.756276	0.00110391
A0A060YC43	S0F2P2	-0.780562	0.000594663
A0A060YCI1	A0A060WN38	0.639286	0.0102884
A0A060YCI1	A0A060YSX4	0.661305	0.00725977
A0A060YCI1	P06350	-0.6366	0.0107165
A0A060YCI1	Q70Z26	-0.746429	0.00139141
A0A060YCI1	Q92093	0.643743	0.00960753
A0A060YD01	A0A060VM28	0.660714	0.00733057
A0A060YD01	A0A060WHT8	-0.628542	0.0120848
A0A060YD01	A0A060WJB1	0.614286	0.014834
A0A060YD01	A0A060WKG4	-0.635739	0.0108568
A0A060YD01	A0A060WN18	0.627244	0.0123173
A0A060YD01	A0A060XA94	0.689286	0.00447373
A0A060YD01	A0A060XN19	0.603571	0.0172001
A0A060YD01	A0A060XRC5	0.607143	0.0163813
A0A060YD01	A0A060YH37	0.642857	0.00973994
A0A060YD01	A0A060YST0	-0.68495	0.00483817
A0A060YD01	A0A061A7B4	0.739286	0.00163551
A0A060YD01	A5H0J9	0.603571	0.0172001
A0A060YD01	C1BG12	-0.648854	0.0088705
A0A060YD01	O57523	0.767857	0.00082933
A0A060YD01	P79899	0.681396	0.00515407
A0A060YD01	Q9YGE8	-0.603571	0.0172001
A0A060YD33	A0A060VWW1	0.624926	0.0127411
A0A060YD33	A0A060W754	0.7649	0.000893483
A0A060YD33	A0A060W917	0.707748	0.00315795
A0A060YD33	A0A060WC08	-0.67953	0.00532634
A0A060YD33	A0A060WCH3	0.643749	0.00960655
A0A060YD33	A0A060WGR2	-0.672369	0.00603017
A0A060YD33	A0A060WHT8	-0.637059	0.0106424
A0A060YD33	A0A060WKG4	-0.672369	0.00603017
A0A060YD33	A0A060WN38	0.655043	0.00803824
A0A060YD33	A0A060WRB4	-0.672369	0.00603017
A0A060YD33	A0A060WXK2	0.613632	0.0149706
A0A060YD33	A0A060WZY4	0.617397	0.0141964
A0A060YD33	A0A060X960	-0.696454	0.00391932
A0A060YD33	A0A060XBB9	-0.672369	0.00603017
A0A060YD33	A0A060XGG8	-0.627369	0.0122947
A0A060YD33	A0A060XKK4	-0.649977	0.00871477
A0A060YD33	A0A060Y2D3	0.691398	0.00430424
A0A060YD33	A0A060Y572	-0.672369	0.00603017
A0A060YD33	A0A060Y5T9	0.741629	0.0015519
A0A060YD33	A0A060YNF5	-0.672369	0.00603017
A0A060YD33	A0A060YSH4	0.68516	0.00481994
A0A060YD33	A0A060YST0	-0.611577	0.0154069
A0A060YD33	A0A060YU50	0.613632	0.0149706
A0A060YD33	A0A060YXK5	-0.629869	0.0118506
A0A060YD33	A0A060Z4W3	0.659397	0.00749042
A0A060YD33	A0A060Z9H8	-0.672369	0.00603017
A0A060YD33	C1BF66	-0.615824	0.0145161
A0A060YD33	C1BG12	-0.698244	0.00378978
A0A060YD33	C1BH52	0.625485	0.0126379
A0A060YD33	C4B4C5	0.741629	0.0015519
A0A060YD33	D5H440	0.666337	0.00667821
A0A060YD33	Q3LA41	0.683575	0.00495849
A0A060YD33	Q70Z26	-0.662572	0.00710968
A0A060YD33	Q9I9M6	0.607143	0.0163813
A0A060YD33	Q9PT14	-0.617397	0.0141964
A0A060YD33	S0F2P2	-0.657411	0.00773651
A0A060YDK5	A0A060XIK2	0.686685	0.00468962
A0A060YDR3	A0A060W2S2	0.610714	0.0155928
A0A060YDR3	A0A060ZVC3	0.814286	0.000219366
A0A060YDR3	P14527	-0.680965	0.00519338
A0A060YDR3	Q98974	-0.610714	0.0155928
A0A060YET5	A0A060W1F1	-0.634432	0.0110722
A0A060YET5	A0A060WFS6	0.675006	0.00576293
A0A060YET5	A0A060XIK2	0.791903	0.000433806
A0A060YET5	A0A060Y683	-0.822548	0.000166691
A0A060YET5	A0A060YDK5	0.66381	0.00696555
A0A060YET5	A0A060YJ35	0.637127	0.0106314
A0A060YET5	A0A060YSX4	-0.675609	0.00570311
A0A060YET5	A0A060YTC6	-0.684227	0.00490111
A0A060YET5	A0A060Z062	0.740217	0.00160188
A0A060YET5	A0A061A7Q3	0.774163	0.000704951
A0A060YG41	A0A060W7E7	-0.635714	0.0108607
A0A060YG41	C0KIP4	0.621429	0.013402
A0A060YH37	A0A060WC08	-0.713153	0.002838
A0A060YH37	A0A060WGR2	-0.665506	0.00677167
A0A060YH37	A0A060WHF0	-0.7	0.00366607
A0A060YH37	A0A060WHT8	-0.749415	0.00129849
A0A060YH37	A0A060WJB1	0.8	0.00034227
A0A060YH37	A0A060WKG4	-0.733545	0.00185573
A0A060YH37	A0A060WN18	0.616491	0.0143797
A0A060YH37	A0A060WRB4	-0.644244	0.00953329
A0A060YH37	A0A060XBB9	-0.695273	0.00400671
A0A060YH37	A0A060XEG1	-0.692857	0.00419023
A0A060YH37	A0A060Y572	-0.678263	0.00544585
A0A060YH37	A0A060YNF5	-0.665506	0.00677167
A0A060YH37	A0A060YST0	-0.813881	0.000222259
A0A060YH37	A0A060Z9H8	-0.70803	0.00314057
A0A060YH37	A0A061A7B4	0.746429	0.00139141
A0A060YH37	A5H0J9	0.635714	0.0108607
A0A060YH37	C1BG12	-0.730203	0.00199448
A0A060YH37	P79899	0.643749	0.00960655
A0A060YH37	S0F2P2	-0.751509	0.00123639
A0A060YJ35	A0A060XIK2	0.713409	0.00282355
A0A060YJ35	A0A060YDK5	0.737147	0.00171493
A0A060YJ35	A0A060YRH9	0.615928	0.0144948
A0A060YJ80	A0A060XIK2	0.763864	0.000916896
A0A060YJ80	A0A060Y2D3	0.678029	0.00546812
A0A060YJC7	A0A060XAE5	-0.721429	0.00239887
A0A060YJC7	A0A060YP37	0.953571	3.79244e-08
A0A060YJC7	C1BEH9	0.640629	0.0100793
A0A060YJC7	C1BEX3	0.95	6.08626e-08
A0A060YJC7	P62797	0.61101	0.0155289
A0A060YJC7	P69069	0.644658	0.00947212
A0A060YJC7	Q98973	0.989286	2.99893e-12
A0A060YJC7	Q98974	0.885714	1.11998e-05
A0A060YKA6	A0A060X8X3	0.664269	0.00691264
A0A060YKA6	Q9PT13	-0.718661	0.00253921
A0A060YKT0	A0A060W748	-0.603079	0.0173155
A0A060YKT0	A0A060W754	0.711605	0.00292689
A0A060YKT0	A0A060WCH3	0.687916	0.00458645
A0A060YKT0	A0A060WGU6	-0.71558	0.00270308
A0A060YKT0	A0A060X960	-0.604923	0.0168866
A0A060YKT0	A0A060XKA1	0.680539	0.00523264
A0A060YKT0	A0A060XRC5	0.67685	0.00558166
A0A060YKT0	A0A060XYF3	0.617833	0.0141088
A0A060YKT0	A0A060Y2D3	0.668175	0.00647521
A0A060YKT0	A0A060Y2D6	0.686071	0.00474171
A0A060YKT0	A0A060YTC6	-0.619677	0.0137427
A0A060YKT0	A0A060YV80	0.635922	0.0108268
A0A060YKT0	A0A060Z4W3	0.614694	0.0147491
A0A060YKT0	C0KIP4	-0.726645	0.00215126
A0A060YKT0	C1BH52	0.626692	0.0124172
A0A060YKT0	P11941	-0.699606	0.00369353
A0A060YKT0	P98093	-0.671317	0.00613942
A0A060YKT0	Q9DFD5	-0.669524	0.00632933
A0A060YKT0	Q9I9M6	0.703742	0.0034131
A0A060YKT0	Q9PT14	-0.817015	0.000200641
A0A060YKT0	W8W0X1	0.621453	0.0133973
A0A060YM30	A0A060YY24	0.629133	0.01198
A0A060YM51	Q6XZB7	-0.696691	0.00390199
A0A060YM51	Q9PT02	0.671429	0.00612777
A0A060YNF5	A0A060YST0	0.839543	9.04806e-05
A0A060YNF5	A0A060Z9H8	0.989873	2.08122e-12
A0A060YNF5	C1BGU6	0.840452	8.74048e-05
A0A060YNF5	Q08G23	0.862282	3.54967e-05
A0A060YP37	C1BEX3	0.953571	3.79244e-08
A0A060YPN6	A0A060W748	0.725	0.00222703
A0A060YPN6	A0A060WC08	0.640629	0.0100793
A0A060YPN6	A0A060WGR2	0.703778	0.00341078
A0A060YPN6	A0A060WGU6	0.671429	0.00612777
A0A060YPN6	A0A060WHT8	0.805823	0.000286743
A0A060YPN6	A0A060WKG4	0.622981	0.0131054
A0A060YPN6	A0A060WN18	-0.663087	0.00704948
A0A060YPN6	A0A060WRB4	0.648496	0.00892071
A0A060YPN6	A0A060WUN3	-0.75	0.0012809
A0A060YPN6	A0A060X0D1	-0.635714	0.0108607
A0A060YPN6	A0A060XBB9	0.661253	0.00726595
A0A060YPN6	A0A060XKK4	0.620197	0.013641
A0A060YPN6	A0A060XRC5	-0.628571	0.0120795
A0A060YPN6	A0A060XTF5	0.639286	0.0102884
A0A060YPN6	A0A060Y0R7	0.617857	0.0141039
A0A060YPN6	A0A060Y572	0.627234	0.0123191
A0A060YPN6	A0A060Y7H2	0.746429	0.00139141
A0A060YPN6	A0A060YH37	-0.635714	0.0108607
A0A060YPN6	A0A060YNF5	0.635739	0.0108568
A0A060YPN6	A0A060YST0	0.749415	0.00129849
A0A060YPN6	A0A060YWY3	0.612054	0.0153048
A0A060YPN6	A0A060YY24	0.785714	0.000516455
A0A060YPN6	A0A060YZ84	-0.617857	0.0141039
A0A060YPN6	A0A060Z4W3	-0.621984	0.0132953
A0A060YPN6	A0A060Z9H8	0.631486	0.01157
A0A060YPN6	A0A061A7B4	-0.610714	0.0155928
A0A060YPN6	A5H0J9	-0.6	0.0180501
A0A060YPN6	C1BF66	0.72927	0.0020347
A0A060YPN6	C1BG12	0.72633	0.00216564
A0A060YPN6	D5H440	-0.625	0.0127275
A0A060YPN6	Q70Z26	0.65	0.00871158
A0A060YPN6	S0F2P2	0.739888	0.00161369
A0A060YQ40	A0A060W917	0.674034	0.0058603
A0A060YQ40	A0A060WCY0	0.606243	0.0165847
A0A060YQ40	A0A060WFS6	0.617864	0.0141025
A0A060YQ40	A0A060WXT1	0.651286	0.0085358
A0A060YQ40	A0A060X083	0.667017	0.00660255
A0A060YQ40	A0A060XCX2	0.673319	0.00593273
A0A060YQ40	A0A060XKA1	0.658539	0.00759599
A0A060YQ40	A0A060XPI6	0.611632	0.0153951
A0A060YQ40	C4B4C5	0.672097	0.00605824
A0A060YQ67	A0A060ZVC3	0.667857	0.00650996
A0A060YQ67	C4B4C5	0.603571	0.0172001
A0A060YQ67	Q9DDV9	0.628571	0.0120795
A0A060YRG9	Q70TF5	0.614286	0.014834
A0A060YRH9	A0A060WFS6	0.725	0.00222703
A0A060YRH9	A0A060YG41	0.664286	0.00691068
A0A060YRH9	A0A060YQ67	0.653571	0.00823037
A0A060YSA7	A0A060VWW1	-0.632143	0.0114575
A0A060YSA7	A0A060WUN3	-0.746429	0.00139141
A0A060YSA7	A0A060X0D1	-0.621429	0.013402
A0A060YSA7	A0A060YWY3	0.706961	0.00320684
A0A060YSA7	A0A060YZ84	-0.703571	0.00342434
A0A060YSA7	A5H0J9	-0.610714	0.0155928
A0A060YSA7	C1BF66	0.616455	0.0143872
A0A060YSA7	D0FZZ1	0.632458	0.0114039
A0A060YSA7	D5H440	-0.65	0.00871158
A0A060YSA7	E7BAR3	-0.614286	0.014834
A0A060YSH4	A0A060WC08	-0.656746	0.00782039
A0A060YSH4	A0A060WXK2	0.607143	0.0163813
A0A060YSH4	Q2L4Q6	0.646429	0.00921455
A0A060YST0	A0A060Z9H8	0.86353	3.35613e-05
A0A060YST0	C1BGU6	0.713581	0.00281384
A0A060YST0	Q08G23	0.734265	0.00182688
A0A060YSX4	A0A060XAE5	0.670242	0.00625277
A0A060YSX4	A0A060XPE1	0.623771	0.0129564
A0A060YSX4	A0A060Y683	0.672029	0.0060653
A0A060YSX4	A0A060YDK5	-0.601772	0.0176244
A0A060YSX4	A0A060YJC7	-0.61126	0.0154749
A0A060YSX4	A0A060YTC6	0.75782	0.00106356
A0A060YSX4	C1BEH9	-0.60894	0.0159807
A0A060YSX4	C1BEM6	-0.613048	0.0150937
A0A060YSX4	P06350	-0.645235	0.00938765
A0A060YSX4	P69069	-0.612973	0.0151095
A0A060YTC6	A0A060XAE5	0.682143	0.00508633
A0A060YTC6	A0A060XIK2	-0.647007	0.00913166
A0A060YTC6	A0A060XPE1	0.664286	0.00691068
A0A060YTC6	A0A060XRC5	-0.685714	0.00477225
A0A060YTC6	A0A060Y4C1	-0.642117	0.00985165
A0A060YTC6	P98093	0.717857	0.00258117
A0A060YTC6	Q9PT14	0.607143	0.0163813
A0A060YU50	A0A060VWW1	0.767857	0.00082933
A0A060YU50	A0A060W748	-0.717857	0.00258117
A0A060YU50	A0A060W754	0.772118	0.000743494
A0A060YU50	A0A060WC08	-0.709124	0.00307388
A0A060YU50	A0A060WCH3	0.817857	0.000195137
A0A060YU50	A0A060WGR2	-0.822846	0.000165007
A0A060YU50	A0A060WGU6	-0.782143	0.00056971
A0A060YU50	A0A060WHT8	-0.829998	0.000128564
A0A060YU50	A0A060WKG4	-0.767564	0.000835516
A0A060YU50	A0A060WN18	0.713266	0.00283161
A0A060YU50	A0A060WRB4	-0.793079	0.000419393
A0A060YU50	A0A060WUN3	0.753571	0.00117758
A0A060YU50	A0A060WXK2	0.664286	0.00691068
A0A060YU50	A0A060X0D1	0.867857	2.75181e-05
A0A060YU50	A0A060XA94	0.678571	0.00541655
A0A060YU50	A0A060XBB9	-0.793079	0.000419393
A0A060YU50	A0A060XE72	0.682143	0.00508633
A0A060YU50	A0A060XKA1	0.75	0.0012809
A0A060YU50	A0A060XKK4	-0.873995	2.05139e-05
A0A060YU50	A0A060XPI6	0.768544	0.000814983
A0A060YU50	A0A060XRC5	0.821429	0.000173148
A0A060YU50	A0A060XWZ8	0.617857	0.0141039
A0A060YU50	A0A060Y2D3	0.641581	0.00993322
A0A060YU50	A0A060Y4C1	0.631486	0.01157
A0A060YU50	A0A060Y572	-0.784574	0.000533
A0A060YU50	A0A060Y5T9	0.739286	0.00163551
A0A060YU50	A0A060YNF5	-0.793079	0.000419393
A0A060YU50	A0A060YST0	-0.769561	0.000794094
A0A060YU50	A0A060YWY3	-0.631423	0.0115809
A0A060YU50	A0A060YZ84	0.692857	0.00419023
A0A060YU50	A0A060YZR6	-0.734772	0.00180677
A0A060YU50	A0A060Z9H8	-0.780321	0.000598543
A0A060YU50	A5H0J9	0.767857	0.00082933
A0A060YU50	C1BF66	-0.785677	0.000516983
A0A060YU50	C1BG12	-0.799931	0.000342976
A0A060YU50	C1BGU6	-0.678357	0.00543691
A0A060YU50	C4B4C5	0.664286	0.00691068
A0A060YU50	D5H440	0.782143	0.00056971
A0A060YU50	E7BAR3	0.625	0.0127275
A0A060YU50	P79825	0.792857	0.000422077
A0A060YU50	P79899	0.892214	7.77954e-06
A0A060YU50	Q08G23	-0.660023	0.00741412
A0A060YU50	Q3LA41	0.737797	0.00169048
A0A060YU50	Q9PT14	-0.721429	0.00239887
A0A060YU50	S0F2P2	-0.743762	0.00147885
A0A060YV53	C1BGU6	0.623355	0.0130348
A0A060YV80	A0A060WGU6	-0.614835	0.0147198
A0A060YV80	Q6H964	-0.652368	0.00839007
A0A060YV80	Q9I9M6	0.693309	0.00415543
A0A060YVB2	A0A060VUA9	0.754286	0.00115775
A0A060YVB2	A0A060VZH2	0.706238	0.00325231
A0A060YVB2	A0A060W748	0.65103	0.00857059
A0A060YVB2	A0A060W754	-0.609156	0.0159332
A0A060YVB2	A0A060WC08	0.844734	7.4038e-05
A0A060YVB2	A0A060WGR2	0.832264	0.000118508
A0A060YVB2	A0A060WHF0	0.634432	0.0110722
A0A060YVB2	A0A060WHT8	0.746945	0.00137498
A0A060YVB2	A0A060WJB1	-0.67685	0.00558166
A0A060YVB2	A0A060WKG4	0.845439	7.20077e-05
A0A060YVB2	A0A060WRB4	0.792737	0.000423542
A0A060YVB2	A0A060WUI1	0.754286	0.00115775
A0A060YVB2	A0A060X9D3	0.812208	0.000234562
A0A060YVB2	A0A060XBB9	0.845439	7.20077e-05
A0A060YVB2	A0A060XKK4	0.648843	0.00887208
A0A060YVB2	A0A060XPE1	-0.601235	0.0177527
A0A060YVB2	A0A060XTF5	0.713736	0.00280515
A0A060YVB2	A0A060Y572	0.819088	0.000187313
A0A060YVB2	A0A060Y7H2	0.603079	0.0173155
A0A060YVB2	A0A060YC43	-0.621522	0.0133841
A0A060YVB2	A0A060YH37	-0.7414	0.00155994
A0A060YVB2	A0A060YNF5	0.810304	0.000249229
A0A060YVB2	A0A060YST0	0.73238	0.00190317
A0A060YVB2	A0A060YWQ3	0.86535	3.08979e-05
A0A060YVB2	A0A060YY24	0.840991	8.56203e-05
A0A060YVB2	A0A060YZ84	-0.719268	0.00250785
A0A060YVB2	A0A060Z9H8	0.836656	0.000100859
A0A060YVB2	A0A061A7A8	-0.668225	0.0064697
A0A060YVB2	A0A061A7B4	-0.647342	0.00908388
A0A060YVB2	A0A061AD33	0.617833	0.0141088
A0A060YVB2	A5H0J9	-0.719268	0.00250785
A0A060YVB2	B5AXN8	0.66394	0.00695048
A0A060YVB2	C1BF66	0.705332	0.00330993
A0A060YVB2	C1BG12	0.668134	0.00647971
A0A060YVB2	C1BGU6	0.620129	0.0136542
A0A060YVB2	C1BHQ1	0.695914	0.00395906
A0A060YVB2	D0FZZ1	0.824409	0.000156394
A0A060YVB2	D5H440	-0.671317	0.00613942
A0A060YVB2	Q08G23	0.629597	0.0118983
A0A060YVB2	Q70Z26	0.66394	0.00695048
A0A060YVB2	Q90ZF1	0.75619	0.00110619
A0A060YVB2	S0F2P2	0.765153	0.000887848
A0A060YWQ3	A0A060VVE5	0.665996	0.00671642
A0A060YWQ3	A0A060W748	0.711741	0.002919
A0A060YWQ3	A0A060W754	-0.616792	0.0143186
A0A060YWQ3	A0A060WC08	0.870034	2.48376e-05
A0A060YWQ3	A0A060WCH3	-0.618043	0.0140667
A0A060YWQ3	A0A060WGR2	0.808838	0.000261034
A0A060YWQ3	A0A060WGU6	0.600024	0.0180442
A0A060YWQ3	A0A060WHF0	0.668496	0.00644029
A0A060YWQ3	A0A060WHT8	0.837509	9.76947e-05
A0A060YWQ3	A0A060WJB1	-0.632458	0.0114039
A0A060YWQ3	A0A060WKG4	0.847456	6.64549e-05
A0A060YWQ3	A0A060WN18	-0.741421	0.00155917
A0A060YWQ3	A0A060WRB4	0.800256	0.000339657
A0A060YWQ3	A0A060WUN3	-0.630656	0.0117133
A0A060YWQ3	A0A060XBB9	0.826002	0.000148003
A0A060YWQ3	A0A060XGG8	0.624908	0.0127445
A0A060YWQ3	A0A060XKK4	0.660978	0.00729895
A0A060YWQ3	A0A060XTF5	0.726156	0.0021736
A0A060YWQ3	A0A060Y0R7	0.639666	0.010229
A0A060YWQ3	A0A060Y572	0.834583	0.000108896
A0A060YWQ3	A0A060Y7H2	0.717146	0.00261874
A0A060YWQ3	A0A060YD01	-0.657684	0.00770229
A0A060YWQ3	A0A060YH37	-0.827061	0.000142631
A0A060YWQ3	A0A060YNF5	0.830292	0.000127218
A0A060YWQ3	A0A060YPN6	0.767599	0.000834783
A0A060YWQ3	A0A060YST0	0.861903	3.61019e-05
A0A060YWQ3	A0A060YU50	-0.600024	0.0180442
A0A060YWQ3	A0A060YY24	0.818051	0.000193886
A0A060YWQ3	A0A060YZ84	-0.729759	0.00201353
A0A060YWQ3	A0A060YZR6	0.656429	0.00786054
A0A060YWQ3	A0A060Z4W3	-0.602364	0.0174839
A0A060YWQ3	A0A060Z9H8	0.843165	7.87239e-05
A0A060YWQ3	A0A061A7B4	-0.782014	0.000571716
A0A060YWQ3	A0A061AD33	0.706335	0.00324615
A0A060YWQ3	A5H0J9	-0.800032	0.000341938
A0A060YWQ3	B5AXN8	0.679307	0.0053472
A0A060YWQ3	C1BF66	0.73587	0.00176385
A0A060YWQ3	C1BG12	0.776877	0.000656307
A0A060YWQ3	C1BGU6	0.661371	0.00725188
A0A060YWQ3	C1BH52	-0.611382	0.0154488
A0A060YWQ3	D0FZZ1	0.640909	0.0100362
A0A060YWQ3	D5H440	-0.738769	0.00165444
A0A060YWQ3	P79899	-0.617286	0.0142187
A0A060YWQ3	Q08G23	0.689121	0.00448717
A0A060YWQ3	Q70Z26	0.758589	0.0010439
A0A060YWQ3	Q90ZF1	0.86535	3.08979e-05
A0A060YWQ3	Q9DFD5	0.679253	0.00535221
A0A060YWQ3	Q9DG75	-0.602364	0.0174839
A0A060YWQ3	Q9YGE8	0.650477	0.00864609
A0A060YWQ3	S0F2P2	0.914663	1.80243e-06
A0A060YWY3	A0A060WGR2	0.701086	0.00359114
A0A060YWY3	A0A060WHT8	0.653343	0.00826049
A0A060YWY3	A0A060WKG4	0.687249	0.00464208
A0A060YWY3	A0A060WRB4	0.724148	0.00226708
A0A060YWY3	A0A060XBB9	0.654962	0.00804871
A0A060YWY3	A0A060Y4C1	-0.605379	0.0167819
A0A060YWY3	A0A060Y572	0.673412	0.0059233
A0A060YWY3	A0A060YNF5	0.691862	0.00426778
A0A060YWY3	A0A060Z9H8	0.678024	0.00546859
A0A060YWY3	C1BG12	0.646008	0.00927518
A0A060YWY3	C1BGU6	0.601551	0.0176771
A0A060YWY3	Q08G23	0.63138	0.0115883
A0A060YXK5	A0A060VVE5	0.634331	0.011089
A0A060YXK5	A0A060VWW1	-0.776441	0.000663934
A0A060YXK5	A0A060W748	0.739555	0.00162571
A0A060YXK5	A0A060W754	-0.799286	0.000349642
A0A060YXK5	A0A060W917	-0.617833	0.0141088
A0A060YXK5	A0A060WCH3	-0.820704	0.000177438
A0A060YXK5	A0A060WHT8	0.649155	0.00882855
A0A060YXK5	A0A060X0D1	-0.63812	0.0104726
A0A060YXK5	A0A060X960	0.660251	0.00738642
A0A060YXK5	A0A060XAE5	0.601235	0.0177527
A0A060YXK5	A0A060XKK4	0.719911	0.002475
A0A060YXK5	A0A060XRC5	-0.71558	0.00270308
A0A060YXK5	A0A060XTF5	0.632587	0.0113819
A0A060YXK5	A0A060Y2D3	-0.649666	0.0087577
A0A060YXK5	A0A060Y5T9	-0.604923	0.0168866
A0A060YXK5	A0A060Y9M1	0.783818	0.0005442
A0A060YXK5	A0A060YST0	0.611704	0.0153796
A0A060YXK5	A0A060YU50	-0.700826	0.00360902
A0A060YXK5	A0A060YZR6	0.758869	0.00103683
A0A060YXK5	A5H0J9	-0.604923	0.0168866
A0A060YXK5	C1BG12	0.656131	0.00789848
A0A060YXK5	C1BGU6	0.643798	0.00959928
A0A060YXK5	C1BH52	-0.782673	0.000561535
A0A060YXK5	C4B4C5	-0.623366	0.0130327
A0A060YXK5	D5H440	-0.735867	0.00176395
A0A060YXK5	P79825	-0.687916	0.00458645
A0A060YXK5	Q08G23	0.624863	0.0127528
A0A060YXK5	Q6H964	0.617833	0.0141088
A0A060YXK5	Q9PT14	0.789351	0.000466467
A0A060YXK5	Q9YGE8	0.732178	0.0019115
A0A060YXV0	A0A060X8D9	0.630828	0.0116835
A0A060YXV0	A0A060YDK5	0.603393	0.0172418
A0A060YXV0	A0A060YV80	0.613455	0.0150078
A0A060YXV0	A0A061A7Q3	0.690788	0.00435271
A0A060YXV0	A8YQG5	0.672508	0.00601583
A0A060YY24	A0A060WC08	0.701066	0.00359254
A0A060YY24	A0A060WGR2	0.818593	0.000190427
A0A060YY24	A0A060WHF0	0.825	0.000153236
A0A060YY24	A0A060WHT8	0.846114	7.0109e-05
A0A060YY24	A0A060WKG4	0.767564	0.000835516
A0A060YY24	A0A060WRB4	0.780321	0.000598543
A0A060YY24	A0A060WUN3	-0.728571	0.00206521
A0A060YY24	A0A060XBB9	0.793079	0.000419393
A0A060YY24	A0A060XRC5	-0.607143	0.0163813
A0A060YY24	A0A060Y572	0.767564	0.000835516
A0A060YY24	A0A060YH37	-0.703571	0.00342434
A0A060YY24	A0A060YNF5	0.771817	0.000749325
A0A060YY24	A0A060YST0	0.793736	0.000411514
A0A060YY24	A0A060Z9H8	0.771817	0.000749325
A0A060YY24	A5H0J9	-0.746429	0.00139141
A0A060YY24	C1BF66	0.709124	0.00307388
A0A060YY24	C1BG12	0.78831	0.000480356
A0A060YY24	C1BGU6	0.641689	0.00991678
A0A060YY24	D5H440	-0.785714	0.000516455
A0A060YY24	Q08G23	0.623355	0.0130348
A0A060YY24	S0F2P2	0.728267	0.00207864
A0A060YZ76	A0A060VM28	0.642857	0.00973994
A0A060YZ76	A0A060YP37	-0.614286	0.014834
A0A060YZ76	A0A060YSX4	0.695264	0.00400737
A0A060YZ76	P06350	-0.6366	0.0107165
A0A060YZ84	A0A060WC08	-0.72927	0.0020347
A0A060YZ84	A0A060WCH3	0.614286	0.014834
A0A060YZ84	A0A060WGR2	-0.835603	0.000104878
A0A060YZ84	A0A060WGU6	-0.610714	0.0155928
A0A060YZ84	A0A060WHT8	-0.741357	0.00156143
A0A060YZ84	A0A060WKG4	-0.818593	0.000190427
A0A060YZ84	A0A060WN18	0.602154	0.0175336
A0A060YZ84	A0A060WRB4	-0.780321	0.000598543
A0A060YZ84	A0A060WUN3	0.757143	0.00108111
A0A060YZ84	A0A060X0D1	0.710714	0.00297899
A0A060YZ84	A0A060XBB9	-0.818593	0.000190427
A0A060YZ84	A0A060XKK4	-0.616622	0.0143531
A0A060YZ84	A0A060Y572	-0.810088	0.000250939
A0A060YZ84	A0A060YH37	0.653571	0.00823037
A0A060YZ84	A0A060YNF5	-0.814341	0.000218974
A0A060YZ84	A0A060YST0	-0.705095	0.00332516
A0A060YZ84	A0A060YWY3	-0.776689	0.000659596
A0A060YZ84	A0A060YY24	-0.685714	0.00477225
A0A060YZ84	A0A060Z9H8	-0.822846	0.000165007
A0A060YZ84	A0A060Z9P5	0.627938	0.0121925
A0A060YZ84	A5H0J9	0.825	0.000153236
A0A060YZ84	C1BF66	-0.842085	8.209e-05
A0A060YZ84	C1BG12	-0.712772	0.00285972
A0A060YZ84	C1BGU6	-0.605021	0.0168641
A0A060YZ84	D0FZZ1	-0.619845	0.0137098
A0A060YZ84	D5H440	0.746429	0.00139141
A0A060YZ84	P79899	0.730336	0.00198884
A0A060YZ84	Q08G23	-0.623355	0.0130348
A0A060YZ84	Q804V3	0.650856	0.0085943
A0A060YZ84	S0F2P2	-0.675971	0.0056675
A0A060YZR6	A0A060VVE5	0.666993	0.00660522
A0A060YZR6	A0A060VWW1	-0.756277	0.00110388
A0A060YZR6	A0A060W748	0.709682	0.00304033
A0A060YZR6	A0A060W754	-0.81794	0.000194601
A0A060YZR6	A0A060WCH3	-0.849468	6.12725e-05
A0A060YZR6	A0A060WGR2	0.642289	0.00982562
A0A060YZR6	A0A060WGU6	0.706098	0.00326115
A0A060YZR6	A0A060WHF0	0.788536	0.000477316
A0A060YZR6	A0A060WHT8	0.788499	0.000477814
A0A060YZR6	A0A060WKG4	0.710572	0.00298737
A0A060YZR6	A0A060WRB4	0.672163	0.00605141
A0A060YZR6	A0A060X8X3	0.630799	0.0116886
A0A060YZR6	A0A060XBB9	0.684966	0.00483673
A0A060YZR6	A0A060XE72	-0.609323	0.0158964
A0A060YZR6	A0A060XKK4	0.869958	2.49267e-05
A0A060YZR6	A0A060XRC5	-0.731187	0.00195278
A0A060YZR6	A0A060XVF4	0.670255	0.00625133
A0A060YZR6	A0A060Y2D3	-0.708633	0.00310367
A0A060YZR6	A0A060Y572	0.693502	0.00414064
A0A060YZR6	A0A060Y5T9	-0.813625	0.000224105
A0A060YZR6	A0A060Y9M1	0.756277	0.00110388
A0A060YZR6	A0A060YH37	-0.684592	0.00486922
A0A060YZR6	A0A060YNF5	0.680698	0.00521791
A0A060YZR6	A0A060YST0	0.853196	5.25501e-05
A0A060YZR6	A0A060YY24	0.620076	0.0136646
A0A060YZR6	A0A060Z9H8	0.697769	0.00382382
A0A060YZR6	A5H0J9	-0.677424	0.00552619
A0A060YZR6	C0KIP4	0.677424	0.00552619
A0A060YZR6	C1BG12	0.837792	9.66627e-05
A0A060YZR6	D5H440	-0.824378	0.000156561
A0A060YZR6	O57523	-0.602154	0.0175336
A0A060YZR6	P79825	-0.670255	0.00625133
A0A060YZR6	P79899	-0.680064	0.00527654
A0A060YZR6	Q08G23	0.607193	0.0163699
A0A060YZR6	Q3LA41	-0.601746	0.0176306
A0A060YZR6	Q9PT14	0.88531	1.14481e-05
A0A060YZR6	Q9YGE8	0.770614	0.000772925
A0A060YZR6	S0F2P2	0.690061	0.00441094
A0A060Z062	A0A060W1F1	-0.677391	0.00552936
A0A060Z062	A0A060Y2D3	0.674442	0.00581927
A0A060Z062	C4B4C5	0.73101	0.00196024
A0A060Z062	Q7ZZW1	0.63807	0.0104806
A0A060Z272	A0A060XKA1	0.617857	0.0141039
A0A060Z272	A0A060XYF3	0.739286	0.00163551
A0A060Z272	A0A060Y7H2	0.6	0.0180501
A0A060Z272	A0A060YDR3	0.642857	0.00973994
A0A060Z272	Q2WFI5	0.607143	0.0163813
A0A060Z272	Q92093	0.621921	0.0133074
A0A060Z3J5	A0A060VWW1	0.707775	0.00315627
A0A060Z3J5	A0A060W917	0.679178	0.00535929
A0A060Z3J5	A0A060WCY0	0.634495	0.0110616
A0A060Z3J5	A0A060WN38	0.693477	0.00414255
A0A060Z3J5	A0A060X0D1	0.655943	0.00792251
A0A060Z3J5	A0A060XPI6	0.70483	0.00334224
A0A060Z3J5	A0A060Y2D3	0.724666	0.00224266
A0A060Z3J5	A0A060YJ80	0.645796	0.00930595
A0A060Z3J5	A0A060YQ67	0.607686	0.0162595
A0A060Z3J5	A0A060Z062	0.71288	0.00285352
A0A060Z3J5	A5JUT5	0.721079	0.00241625
A0A060Z3J5	C4B4C5	0.768544	0.000814983
A0A060Z3J5	Q7ZZW1	0.723861	0.00228073
A0A060Z4W3	A0A060VWW1	0.786417	0.000506474
A0A060Z4W3	A0A060W748	-0.702413	0.0035013
A0A060Z4W3	A0A060W754	0.756708	0.00109249
A0A060Z4W3	A0A060W917	0.782842	0.000558945
A0A060Z4W3	A0A060WCH3	0.781055	0.000586793
[truncated: 1,147 more rows]
